# Supplementary material for: Unveiling the Antidiabetic Potential of Achyranthes aspera In Vitro and In Silico Efficacy Insights
Source: Research Square preprint supplement (doi:10.21203/rs.3.rs-5777722/v1), 2025-04-29
Supplement: Supplementary file 1 [file 22d0a511a2e7d92729c6414f.xlsx]

## Sheet: TITLE
supplementary material 1:The bioactive compounds in the HW crude extract were identified using HPLC/LC-MS analysis. The full list of compound

## Sheet: Table s1
Cpd	File	ID Source	Name		Formula	RT	m/z	Mass	Score	Score (DB)	Diff (DB, ppm)	Polarity	Ions	Height	Vol
1	HW_Dougles.d	DBSearch	1,2-Dihydroxy-3-keto-5-methylthiopentene		C6 H10 O3 S	0.85	185.024	162.034	60.7	60.7	6.56	Positive	2	15202	69660
Best	ID Source	Name	Formula		Score	RT Diff	Diff (ppm)	Score (Lib)	Score (DB)	Num Spectra	Precursor (Acq)
TRUE	DBSearch	1,2-Dihydroxy-3-keto-5-methylthiopentene	C6 H10 O3 S		60.7		6.56		60.7	0
	m/z	Species	Ion Formula		Score (MFG)	Score (MS)	Score (mass)	Score (iso. abund)	Score (iso. spacing)
	185.024	(M+Na)+				60.7	87.49	57.23	11.3
		m/z	m/z (Calc)		Diff (ppm)	Height (Calc)	Height %	Height % (Calc)	Height Sum% (Calc)
		185.024	185.024		3.69	15650.6	100	100	93
2	HW_Dougles.d					0.85	271.918	270.91				Positive	3	6120	44995
3	HW_Dougles.d					0.851	167.013	166.006				Positive	2	62176	257273
4	HW_Dougles.d	DBSearch	Dimethyl trisulfide	Fungus growth inhibitions	C2 H6 S3	0.851	143.997	125.963	74.61	74.61	-1.17	Positive	3	136600	594048
Best	ID Source	Name	Formula		Score	RT Diff	Diff (ppm)	Score (Lib)	Score (DB)	Num Spectra	Precursor (Acq)
TRUE	DBSearch	Dimethyl trisulfide	C2 H6 S3		74.61		-1.17		74.61	0
	m/z	Species	Ion Formula		Score (MFG)	Score (MS)	Score (mass)	Score (iso. abund)	Score (iso. spacing)
	143.997	(M+NH4)+				74.61	99.7	16.14	94.59
		m/z	m/z (Calc)		Diff (ppm)	Height (Calc)	Height %	Height % (Calc)	Height Sum% (Calc)
		143.997	143.997		-0.16	122504	100	100	84.4
5	HW_Dougles.d					0.851	117.998	233.982				Positive	3	6219	28820
6	HW_Dougles.d					0.851	125.986	124.979				Positive	2	717224	2937270
7	HW_Dougles.d					0.851	223.989	222.982				Positive	3	8685	42526
8	HW_Dougles.d					0.851	110.009	109.002				Positive	2	83194	392765
9	HW_Dougles.d	DBSearch	1-Isothiocyanato-2-(methylthio)ethane		C4 H7 N S2	0.852	151.035	133.001	52.9	52.9	5.95	Positive	2	34443	173260
Best	ID Source	Name	Formula		Score	RT Diff	Diff (ppm)	Score (Lib)	Score (DB)	Num Spectra	Precursor (Acq)
TRUE	DBSearch	1-Isothiocyanato-2-(methylthio)ethane	C4 H7 N S2		52.9		5.95		52.9	0
	m/z	Species	Ion Formula		Score (MFG)	Score (MS)	Score (mass)	Score (iso. abund)	Score (iso. spacing)
	151.036	(M+NH4)+				52.9	92.03	3.28	34.17
		m/z	m/z (Calc)		Diff (ppm)	Height (Calc)	Height %	Height % (Calc)	Height Sum% (Calc)
		151.035	151.036		3.62	38973.1	100	100	93.7
10	HW_Dougles.d					0.852	255.945	254.937				Positive	2	70981	283733
11	HW_Dougles.d					0.852	239.967	238.959				Positive	3	40329	197283
12	HW_Dougles.d					0.852	128.017	127.01				Positive	2	20883	97399
13	HW_Dougles.d					0.853	198.94	197.933				Positive	3	22006	108003
14	HW_Dougles.d					0.853	539.817	516.827				Positive	2	2239	11516
15	HW_Dougles.d					0.853	430.863	429.857				Positive	3	5087	27225
16	HW_Dougles.d	DBSearch	Methylselenopyruvate		C4 H6 O3 Se	0.853	214.918	175.955	58.65	58.65	-5.84	Positive	3	158595	629559
Best	ID Source	Name	Formula		Score	RT Diff	Diff (ppm)	Score (Lib)	Score (DB)	Num Spectra	Precursor (Acq)
TRUE	DBSearch	Methylselenopyruvate	C4 H6 O3 Se		58.65		-5.84		58.65	0
	m/z	Species	Ion Formula		Score (MFG)	Score (MS)	Score (mass)	Score (iso. abund)	Score (iso. spacing)
	220.911	(M+K)+				58.65	88.82	0	68.67
		m/z	m/z (Calc)		Diff (ppm)	Height (Calc)	Height %	Height % (Calc)	Height Sum% (Calc)
		214.918	214.917		-3.09	14517.9	100	9.4	8.6
17	HW_Dougles.d					0.853	273.955	272.948				Positive	2	26001	111162
18	HW_Dougles.d					0.853	474.835	473.827				Positive	3	15839	59715
19	HW_Dougles.d					0.853	344.876	343.869				Positive	3	27893	110527
20	HW_Dougles.d					0.853	257.977	256.97				Positive	2	10584	49902
21	HW_Dougles.d					0.856	300.905	299.898				Positive	2	7386	32046
22	HW_Dougles.d					0.875	959.966	958.959				Positive	2	11704	46184
23	HW_Dougles.d	DBSearch	(E)-2-Methyl-2-buten-1-ol O-beta-D-Glucopyranoside		C11 H20 O6	0.914	266.159	248.125	80.51	80.51	4.34	Positive	2	39896	131861
Best	ID Source	Name	Formula		Score	RT Diff	Diff (ppm)	Score (Lib)	Score (DB)	Num Spectra	Precursor (Acq)
TRUE	DBSearch	(E)-2-Methyl-2-buten-1-ol O-beta-D-Glucopyranoside	C11 H20 O6		80.51		4.34		80.51	0
	m/z	Species	Ion Formula		Score (MFG)	Score (MS)	Score (mass)	Score (iso. abund)	Score (iso. spacing)
	266.16	(M+NH4)+				80.51	90.41	94.57	43.84
		m/z	m/z (Calc)		Diff (ppm)	Height (Calc)	Height %	Height % (Calc)	Height Sum% (Calc)
		266.159	266.16		4.45	39632.6	100	100	88.7
24	HW_Dougles.d					0.919	130.526	259.038				Positive	2	14684	43994
25	HW_Dougles.d	DBSearch	Panose		C18 H32 O16	0.941	543.132	504.17	61.09	61.09	-0.83	Positive	2	7902	30326
Best	ID Source	Name	Formula		Score	RT Diff	Diff (ppm)	Score (Lib)	Score (DB)	Num Spectra	Precursor (Acq)
TRUE	DBSearch	Panose	C18 H32 O16		61.09		-0.83		61.09	0
	m/z	Species	Ion Formula		Score (MFG)	Score (MS)	Score (mass)	Score (iso. abund)	Score (iso. spacing)
	543.132	(M+K)+				61.09	99.24	13.86	41.47
		m/z	m/z (Calc)		Diff (ppm)	Height (Calc)	Height %	Height % (Calc)	Height Sum% (Calc)
		543.132	543.132		-0.14	8192.2	100	100	83
26	HW_Dougles.d	DBSearch	Licoagroside B		C18 H24 O12	0.941	455.117	432.128	74.96	74.96	-2.33	Positive	2	12685	40906
Best	ID Source	Name	Formula		Score	RT Diff	Diff (ppm)	Score (Lib)	Score (DB)	Num Spectra	Precursor (Acq)
TRUE	DBSearch	Licoagroside B	C18 H24 O12		74.96		-2.33		74.96	0
	m/z	Species	Ion Formula		Score (MFG)	Score (MS)	Score (mass)	Score (iso. abund)	Score (iso. spacing)
	455.116	(M+Na)+				74.96	94.94	79.93	29.05
		m/z	m/z (Calc)		Diff (ppm)	Height (Calc)	Height %	Height % (Calc)	Height Sum% (Calc)
		455.117	455.116		-1.23	12603.3	100	100	83.2
27	HW_Dougles.d	DBSearch	Theobromine	theobromine is used as a vasodilator, a diuretic, and heart stimulant. And similar to caffeine, it may be useful in management of fatigue and orthostatic hypotensio	C7 H8 N4 O2	0.942	219.028	180.065	85.06	85.06	-2.97	Positive	3	27846	98211
Best	ID Source	Name	Formula		Score	RT Diff	Diff (ppm)	Score (Lib)	Score (DB)	Num Spectra	Precursor (Acq)
TRUE	DBSearch	Theobromine	C7 H8 N4 O2		85.06		-2.97		85.06	0
	m/z	Species	Ion Formula		Score (MFG)	Score (MS)	Score (mass)	Score (iso. abund)	Score (iso. spacing)
	219.028	(M+K)+				85.06	96.89	90.57	54.78
		m/z	m/z (Calc)		Diff (ppm)	Height (Calc)	Height %	Height % (Calc)	Height Sum% (Calc)
		219.028	219.028		-0.48	27761.9	100	100	85.3
28	HW_Dougles.d	DBSearch	Nigerose (Sakebiose)		C12 H22 O11	0.943	381.08	342.117	94.18	94.18	-3.55	Positive	3	64409	246170
Best	ID Source	Name	Formula		Score	RT Diff	Diff (ppm)	Score (Lib)	Score (DB)	Num Spectra	Precursor (Acq)
TRUE	DBSearch	Nigerose (Sakebiose)	C12 H22 O11		94.18		-3.55		94.18	0
	m/z	Species	Ion Formula		Score (MFG)	Score (MS)	Score (mass)	Score (iso. abund)	Score (iso. spacing)
	381.079	(M+K)+				94.18	90.81	97.02	97.52
		m/z	m/z (Calc)		Diff (ppm)	Height (Calc)	Height %	Height % (Calc)	Height Sum% (Calc)
		381.08	381.079		-2.95	64964.9	100	100	80.6
29	HW_Dougles.d	DBSearch	Cyclopenthiazide	High blood pressure, heart failure water retention	C13 H18 Cl N3 O4 S2	0.946	397.077	379.044	55.32	55.32	-3.83	Positive	3	9652	35517
Best	ID Source	Name	Formula		Score	RT Diff	Diff (ppm)	Score (Lib)	Score (DB)	Num Spectra	Precursor (Acq)
TRUE	DBSearch	Cyclopenthiazide	C13 H18 Cl N3 O4 S2		55.32		-3.83		55.32	0
	m/z	Species	Ion Formula		Score (MFG)	Score (MS)	Score (mass)	Score (iso. abund)	Score (iso. spacing)
	397.077	(M+NH4)+				55.32	88.32	11.03	42.45
		m/z	m/z (Calc)		Diff (ppm)	Height (Calc)	Height %	Height % (Calc)	Height Sum% (Calc)
		397.077	397.077		-0.4	8259.3	100	100	62.2
30	HW_Dougles.d	DBSearch	tert-butyl p-(bromomethyl) Benzoate		C12 H15 Br O2	0.948	288.06	270.027	43.81	43.81	-3.75	Positive	2	7219	37262
Best	ID Source	Name	Formula		Score	RT Diff	Diff (ppm)	Score (Lib)	Score (DB)	Num Spectra	Precursor (Acq)
TRUE	DBSearch	tert-butyl p-(bromomethyl) Benzoate	C12 H15 Br O2		43.81		-3.75		43.81	0
	m/z	Species	Ion Formula		Score (MFG)	Score (MS)	Score (mass)	Score (iso. abund)	Score (iso. spacing)
	288.059	(M+NH4)+				43.81	92.01	0	0
		m/z	m/z (Calc)		Diff (ppm)	Height (Calc)	Height %	Height % (Calc)	Height Sum% (Calc)
		288.06	288.059		-3.52	7218.8	100	100	100
31	HW_Dougles.d					0.95	279.051	278.044				Positive	2	6117	30533
32	HW_Dougles.d	DBSearch	Nigerose (Sakebiose)		C12 H22 O11	0.952	365.104	342.116	73.11	73.11	1.23	Positive	2	14176	58404
Best	ID Source	Name	Formula		Score	RT Diff	Diff (ppm)	Score (Lib)	Score (DB)	Num Spectra	Precursor (Acq)
TRUE	DBSearch	Nigerose (Sakebiose)	C12 H22 O11		73.11		1.23		73.11	0
	m/z	Species	Ion Formula		Score (MFG)	Score (MS)	Score (mass)	Score (iso. abund)	Score (iso. spacing)
	365.105	(M+Na)+				73.11	98.85	80.15	13.18
		m/z	m/z (Calc)		Diff (ppm)	Height (Calc)	Height %	Height % (Calc)	Height Sum% (Calc)
		365.104	365.105		2.87	14494.8	100	100	88
33	HW_Dougles.d					0.954	266.133	265.126				Positive	2	35109	98773
34	HW_Dougles.d					0.955	293.063	292.056				Positive	4	21572	125741
35	HW_Dougles.d	DBSearch	Nigerose (Sakebiose)		C12 H22 O11	0.976	360.151	342.117	81.64	81.64	-1.17	Positive	3	23552	139985
Best	ID Source	Name	Formula		Score	RT Diff	Diff (ppm)	Score (Lib)	Score (DB)	Num Spectra	Precursor (Acq)
TRUE	DBSearch	Nigerose (Sakebiose)	C12 H22 O11		81.64		-1.17		81.64	0
	m/z	Species	Ion Formula		Score (MFG)	Score (MS)	Score (mass)	Score (iso. abund)	Score (iso. spacing)
	360.15	(M+NH4)+				81.64	98.97	79.65	49.38
		m/z	m/z (Calc)		Diff (ppm)	Height (Calc)	Height %	Height % (Calc)	Height Sum% (Calc)
		360.151	360.15		-1.25	24088.3	100	100	87.7
36	HW_Dougles.d	DBSearch	3-Hydroxy-3-methyl-glutaric acid		C6 H10 O5	0.983	180.087	162.052	73.02	73.02	4.39	Positive	5	24978	346667
Best	ID Source	Name	Formula		Score	RT Diff	Diff (ppm)	Score (Lib)	Score (DB)	Num Spectra	Precursor (Acq)
TRUE	DBSearch	3-Hydroxy-3-methyl-glutaric acid	C6 H10 O5		73.02		4.39		73.02	3
	m/z	Species	Ion Formula		Score (MFG)	Score (MS)	Score (mass)	Score (iso. abund)	Score (iso. spacing)
	180.087	(M+NH4)+				73.02	94.19	90.26	10
		m/z	m/z (Calc)		Diff (ppm)	Height (Calc)	Height %	Height % (Calc)	Height Sum% (Calc)
		180.087	180.087		0.56	25531.9	100	100	93.3
37	HW_Dougles.d					0.984	119.034	118.028				Positive	2	1917	15106
38	HW_Dougles.d	DBSearch	D-Fructuronic acid		C6 H10 O7	0.987	212.077	194.043	47.29	47.29	-1.32	Positive	2	9707	54640
Best	ID Source	Name	Formula		Score	RT Diff	Diff (ppm)	Score (Lib)	Score (DB)	Num Spectra	Precursor (Acq)
TRUE	DBSearch	D-Fructuronic acid	C6 H10 O7		47.29		-1.32		47.29	0
	m/z	Species	Ion Formula		Score (MFG)	Score (MS)	Score (mass)	Score (iso. abund)	Score (iso. spacing)
	212.077	(M+NH4)+				47.29	99.31	0	0
		m/z	m/z (Calc)		Diff (ppm)	Height (Calc)	Height %	Height % (Calc)	Height Sum% (Calc)
		212.077	212.077		-1.21	9707.3	100	100	100
39	HW_Dougles.d					0.988	194.067	176.033				Positive	2	7124	39134
40	HW_Dougles.d	DBSearch	Galactosylglycerol		C9 H18 O8	0.989	255.107	254.099	46.29	46.29	4.99	Positive	3	6801	42193
Best	ID Source	Name	Formula		Score	RT Diff	Diff (ppm)	Score (Lib)	Score (DB)	Num Spectra	Precursor (Acq)
TRUE	DBSearch	Galactosylglycerol	C9 H18 O8		46.29		4.99		46.29	0
	m/z	Species	Ion Formula		Score (MFG)	Score (MS)	Score (mass)	Score (iso. abund)	Score (iso. spacing)
	255.107	(M+H)+				46.29	87.18	8.35	10.05
		m/z	m/z (Calc)		Diff (ppm)	Height (Calc)	Height %	Height % (Calc)	Height Sum% (Calc)
		255.107	255.107		-0.1	7785.6	100	100	90.7
41	HW_Dougles.d					0.989	429.033	428.026				Positive	3	11346	91374
42	HW_Dougles.d	DBSearch	2-Hydroxy-3,4-dimethoxybenzoic Acid		C9 H10 O5	0.99	216.087	198.053	73.24	73.24	-1.12	Positive	4	15480	87751
Best	ID Source	Name	Formula		Score	RT Diff	Diff (ppm)	Score (Lib)	Score (DB)	Num Spectra	Precursor (Acq)
TRUE	DBSearch	2-Hydroxy-3,4-dimethoxybenzoic Acid	C9 H10 O5		73.24		-1.12		73.24	3
	m/z	Species	Ion Formula		Score (MFG)	Score (MS)	Score (mass)	Score (iso. abund)	Score (iso. spacing)
	216.087	(M+NH4)+				73.24	99.49	16.61	88.7
		m/z	m/z (Calc)		Diff (ppm)	Height (Calc)	Height %	Height % (Calc)	Height Sum% (Calc)
		216.087	216.087		-0.49	17638.6	100	100	89.3
43	HW_Dougles.d					0.999	443.012	442.004				Positive	2	4577	28539
44	HW_Dougles.d	DBSearch	N-(1-Deoxy-1-fructosyl)proline		C11 H19 N O7	1.002	278.124	277.116	84.41	84.41	1.7	Positive	3	41183	211934
Best	ID Source	Name	Formula		Score	RT Diff	Diff (ppm)	Score (Lib)	Score (DB)	Num Spectra	Precursor (Acq)
TRUE	DBSearch	N-(1-Deoxy-1-fructosyl)proline	C11 H19 N O7		84.41		1.7		84.41	0
	m/z	Species	Ion Formula		Score (MFG)	Score (MS)	Score (mass)	Score (iso. abund)	Score (iso. spacing)
	278.123	(M+H)+				84.41	98.26	96.26	42.46
		m/z	m/z (Calc)		Diff (ppm)	Height (Calc)	Height %	Height % (Calc)	Height Sum% (Calc)
		278.124	278.123		-0.84	42147.1	100	100	87
45	HW_Dougles.d	DBSearch	Osmaronin		C11 H17 N O6	1.003	260.113	259.105	75.27	75.27	1.39	Positive	2	11750	56380
Best	ID Source	Name	Formula		Score	RT Diff	Diff (ppm)	Score (Lib)	Score (DB)	Num Spectra	Precursor (Acq)
TRUE	DBSearch	Osmaronin	C11 H17 N O6		75.27		1.39		75.27	0
	m/z	Species	Ion Formula		Score (MFG)	Score (MS)	Score (mass)	Score (iso. abund)	Score (iso. spacing)
	260.113	(M+H)+				75.27	98.92	89.89	10.42
		m/z	m/z (Calc)		Diff (ppm)	Height (Calc)	Height %	Height % (Calc)	Height Sum% (Calc)
		260.113	260.113		-1.16	11955.7	100	100	88.7
46	HW_Dougles.d	DBSearch	5'-O-beta-D-Glucosylpyridoxine		C14 H21 N O8	1.012	332.134	331.127	74.28	74.28	-1.55	Positive	2	10053	58090
Best	ID Source	Name	Formula		Score	RT Diff	Diff (ppm)	Score (Lib)	Score (DB)	Num Spectra	Precursor (Acq)
TRUE	DBSearch	5'-O-beta-D-Glucosylpyridoxine	C14 H21 N O8		74.28		-1.55		74.28	0
	m/z	Species	Ion Formula		Score (MFG)	Score (MS)	Score (mass)	Score (iso. abund)	Score (iso. spacing)
	332.134	(M+H)+				74.28	98.24	57.52	46.47
		m/z	m/z (Calc)		Diff (ppm)	Height (Calc)	Height %	Height % (Calc)	Height Sum% (Calc)
		332.134	332.134		-1.09	10627.7	100	100	86.2
47	HW_Dougles.d					1.025	316.159	298.126				Positive	2	2659	19904
48	HW_Dougles.d	DBSearch	8-Amino Caprylic acid		C8 H17 N O2	1.042	160.133	159.126	87.68	87.68	0.83	Positive	2	22696	93593
Best	ID Source	Name	Formula		Score	RT Diff	Diff (ppm)	Score (Lib)	Score (DB)	Num Spectra	Precursor (Acq)
TRUE	DBSearch	8-Amino Caprylic acid	C8 H17 N O2		87.68		0.83		87.68	4
	m/z	Species	Ion Formula		Score (MFG)	Score (MS)	Score (mass)	Score (iso. abund)	Score (iso. spacing)
	160.133	(M+H)+				87.68	99.79	98.9	49.99
		m/z	m/z (Calc)		Diff (ppm)	Height (Calc)	Height %	Height % (Calc)	Height Sum% (Calc)
		160.133	160.133		0.84	22603.2	100	100	91.5
49	HW_Dougles.d	DBSearch	SWEP		C8 H7 Cl2 N O2	1.142	241.975	218.986	49.26	49.26	-3.11	Positive	2	7046	36816
Best	ID Source	Name	Formula		Score	RT Diff	Diff (ppm)	Score (Lib)	Score (DB)	Num Spectra	Precursor (Acq)
TRUE	DBSearch	SWEP	C8 H7 Cl2 N O2		49.26		-3.11		49.26	0
	m/z	Species	Ion Formula		Score (MFG)	Score (MS)	Score (mass)	Score (iso. abund)	Score (iso. spacing)
	241.975	(M+Na)+				49.26	95.65	0	15.6
		m/z	m/z (Calc)		Diff (ppm)	Height (Calc)	Height %	Height % (Calc)	Height Sum% (Calc)
		241.975	241.975		-0.8	7575.2	100	100	91.6
50	HW_Dougles.d	DBSearch	Oxaloglutarate		C7 H8 O7	1.169	222.061	204.027	85.11	85.11	-1.94	Positive	2	13239	93058
Best	ID Source	Name	Formula		Score	RT Diff	Diff (ppm)	Score (Lib)	Score (DB)	Num Spectra	Precursor (Acq)
TRUE	DBSearch	Oxaloglutarate	C7 H8 O7		85.11		-1.94		85.11	0
	m/z	Species	Ion Formula		Score (MFG)	Score (MS)	Score (mass)	Score (iso. abund)	Score (iso. spacing)
	222.061	(M+NH4)+				85.11	98.42	92.49	49.64
		m/z	m/z (Calc)		Diff (ppm)	Height (Calc)	Height %	Height % (Calc)	Height Sum% (Calc)
		222.061	222.061		-1.7	13418.8	100	100	92.3
51	HW_Dougles.d	DBSearch	(S)-2,3,4,5-Tetrahydropiperidine-2-carboxylate		C6 H9 N O2	1.223	128.071	127.063	69.81	69.81	1.74	Positive	3	10510	76681
Best	ID Source	Name	Formula		Score	RT Diff	Diff (ppm)	Score (Lib)	Score (DB)	Num Spectra	Precursor (Acq)
TRUE	DBSearch	(S)-2,3,4,5-Tetrahydropiperidine-2-carboxylate	C6 H9 N O2		69.81		1.74		69.81	0
	m/z	Species	Ion Formula		Score (MFG)	Score (MS)	Score (mass)	Score (iso. abund)	Score (iso. spacing)
	128.071	(M+H)+				69.81	99.34	65.47	15.95
		m/z	m/z (Calc)		Diff (ppm)	Height (Calc)	Height %	Height % (Calc)	Height Sum% (Calc)
		128.071	128.071		-0.61	11079.6	100	100	93.4
52	HW_Dougles.d	DBSearch	Alendronic acid	Osteoporosis	C4 H13 N O7 P2	1.238	287.98	249.018	62.04	62.04	-5.14	Positive	3	12021	88566
Best	ID Source	Name	Formula		Score	RT Diff	Diff (ppm)	Score (Lib)	Score (DB)	Num Spectra	Precursor (Acq)
TRUE	DBSearch	Alendronic acid	C4 H13 N O7 P2		62.04		-5.14		62.04	0
	m/z	Species	Ion Formula		Score (MFG)	Score (MS)	Score (mass)	Score (iso. abund)	Score (iso. spacing)
	287.98	(M+K)+				62.04	86.73	25.43	56.6
		m/z	m/z (Calc)		Diff (ppm)	Height (Calc)	Height %	Height % (Calc)	Height Sum% (Calc)
		287.98	287.98		-1	13808.1	100	100	87.8
53	HW_Dougles.d	DBSearch	Octulose-1,8-bisphosphate		C8 H18 O14 P2	1.243	438.981	400.018	77.7	77.7	-2.57	Positive	3	17408	75641
Best	ID Source	Name	Formula		Score	RT Diff	Diff (ppm)	Score (Lib)	Score (DB)	Num Spectra	Precursor (Acq)
TRUE	DBSearch	Octulose-1,8-bisphosphate	C8 H18 O14 P2		77.7		-2.57		77.7	0
	m/z	Species	Ion Formula		Score (MFG)	Score (MS)	Score (mass)	Score (iso. abund)	Score (iso. spacing)
	438.98	(M+K)+				77.7	94.27	61.92	63.51
		m/z	m/z (Calc)		Diff (ppm)	Height (Calc)	Height %	Height % (Calc)	Height Sum% (Calc)
		438.981	438.98		-1.02	18812.2	100	100	83.4
54	HW_Dougles.d	DBSearch	Aconitic acid		C6 H6 O6	1.243	175.024	174.017	81.33	81.33	-1.85	Positive	2	21168	99816
Best	ID Source	Name	Formula		Score	RT Diff	Diff (ppm)	Score (Lib)	Score (DB)	Num Spectra	Precursor (Acq)
TRUE	DBSearch	Aconitic acid	C6 H6 O6		81.33		-1.85		81.33	6
	m/z	Species	Ion Formula		Score (MFG)	Score (MS)	Score (mass)	Score (iso. abund)	Score (iso. spacing)
	175.024	(M+H)+				81.33	98.84	94.25	30.81
		m/z	m/z (Calc)		Diff (ppm)	Height (Calc)	Height %	Height % (Calc)	Height Sum% (Calc)
		175.024	175.024		-0.95	21435.2	100	100	93.6
55	HW_Dougles.d	DBSearch	Citric acid	flaovouring and perservation	C6 H8 O7	1.244	210.061	192.027	80.23	80.23	-1.29	Positive	3	25478	184972
Best	ID Source	Name	Formula		Score	RT Diff	Diff (ppm)	Score (Lib)	Score (DB)	Num Spectra	Precursor (Acq)
TRUE	DBSearch	Citric acid	C6 H8 O7		80.23		-1.29		80.23	6
	m/z	Species	Ion Formula		Score (MFG)	Score (MS)	Score (mass)	Score (iso. abund)	Score (iso. spacing)
	210.061	(M+NH4)+				80.23	99.35	73.59	49.96
		m/z	m/z (Calc)		Diff (ppm)	Height (Calc)	Height %	Height % (Calc)	Height Sum% (Calc)
		210.061	210.061		-1.15	26545.8	100	100	93.2
56	HW_Dougles.d	DBSearch	Muconic dialdehyde		C6 H6 O2	1.672	128.071	110.037	47.35	47.35	-1.78	Positive	2	18918	88201
Best	ID Source	Name	Formula		Score	RT Diff	Diff (ppm)	Score (Lib)	Score (DB)	Num Spectra	Precursor (Acq)
TRUE	DBSearch	Muconic dialdehyde	C6 H6 O2		47.35		-1.78		47.35	0
	m/z	Species	Ion Formula		Score (MFG)	Score (MS)	Score (mass)	Score (iso. abund)	Score (iso. spacing)
	128.071	(M+NH4)+				47.35	99.44	0	0
		m/z	m/z (Calc)		Diff (ppm)	Height (Calc)	Height %	Height % (Calc)	Height Sum% (Calc)
		128.071	128.071		-1.53	18917.7	100	100	100
57	HW_Dougles.d	DBSearch	Hypoglycin	cause vomitting, food poisoning	C7 H11 N O2	1.74	159.112	141.078	46.2	46.2	3.44	Positive	2	10890	102514
Best	ID Source	Name	Formula		Score	RT Diff	Diff (ppm)	Score (Lib)	Score (DB)	Num Spectra	Precursor (Acq)
TRUE	DBSearch	Hypoglycin	C7 H11 N O2		46.2		3.44		46.2	0
	m/z	Species	Ion Formula		Score (MFG)	Score (MS)	Score (mass)	Score (iso. abund)	Score (iso. spacing)
	159.113	(M+NH4)+				46.2	97.02	0	0
		m/z	m/z (Calc)		Diff (ppm)	Height (Calc)	Height %	Height % (Calc)	Height Sum% (Calc)
		159.112	159.113		3.05	10890.3	100	100	100
58	HW_Dougles.d	DBSearch	2-Acetyl-1-ethylpyrrole		C8 H11 N O	1.901	138.091	137.084	87.3	87.3	0.42	Positive	2	15127	59858
Best	ID Source	Name	Formula		Score	RT Diff	Diff (ppm)	Score (Lib)	Score (DB)	Num Spectra	Precursor (Acq)
TRUE	DBSearch	2-Acetyl-1-ethylpyrrole	C8 H11 N O		87.3		0.42		87.3	0
	m/z	Species	Ion Formula		Score (MFG)	Score (MS)	Score (mass)	Score (iso. abund)	Score (iso. spacing)
	138.091	(M+H)+				87.3	99.96	97.35	49.94
		m/z	m/z (Calc)		Diff (ppm)	Height (Calc)	Height %	Height % (Calc)	Height Sum% (Calc)
		138.091	138.091		0.37	15304.3	100	100	91.6
59	HW_Dougles.d					2.249	439.054	438.046				Positive	2	12062	56191
60	HW_Dougles.d	DBSearch	Phosphocreatine		C4 H10 N3 O5 P	2.252	423.081	211.038	32.13	32.13	-9.46	Positive	2	1754	12947
Best	ID Source	Name	Formula		Score	RT Diff	Diff (ppm)	Score (Lib)	Score (DB)	Num Spectra	Precursor (Acq)
TRUE	DBSearch	Phosphocreatine	C4 H10 N3 O5 P		32.13		-9.46		32.13	3
	m/z	Species	Ion Formula		Score (MFG)	Score (MS)	Score (mass)	Score (iso. abund)	Score (iso. spacing)
	423.079	(2M+H)+				32.13	67.48	0	0
		m/z	m/z (Calc)		Diff (ppm)	Height (Calc)	Height %	Height % (Calc)	Height Sum% (Calc)
		423.081	423.079		-4.72	1754.2	100	100	100
61	HW_Dougles.d					2.252	288.017	287.01				Positive	2	8787	61604
62	HW_Dougles.d					2.55	195.123	194.116				Positive	2	25104	136465
63	HW_Dougles.d	DBSearch	Pirbuterol	relieve cough, wheezing, shortness of breath, and troubled breathing by increasing the flow of air through the bronchial tubes	C12 H20 N2 O3	2.797	258.182	240.148	79.82	79.82	-2.51	Positive	3	21636	148093
Best	ID Source	Name	Formula		Score	RT Diff	Diff (ppm)	Score (Lib)	Score (DB)	Num Spectra	Precursor (Acq)
TRUE	DBSearch	Pirbuterol	C12 H20 N2 O3		79.82		-2.51		79.82	0
	m/z	Species	Ion Formula		Score (MFG)	Score (MS)	Score (mass)	Score (iso. abund)	Score (iso. spacing)
	258.181	(M+NH4)+				79.82	96.81	79.37	46.4
		m/z	m/z (Calc)		Diff (ppm)	Height (Calc)	Height %	Height % (Calc)	Height Sum% (Calc)
		258.182	258.181		-1.88	22443.4	100	100	87.4
64	HW_Dougles.d	DBSearch	Val Leu		C11 H22 N2 O3	3.17	231.17	230.163	85.92	85.92	-0.43	Positive	2	24762	160762
Best	ID Source	Name	Formula		Score	RT Diff	Diff (ppm)	Score (Lib)	Score (DB)	Num Spectra	Precursor (Acq)
TRUE	DBSearch	Val Leu	C11 H22 N2 O3		85.92		-0.43		85.92	3
	m/z	Species	Ion Formula		Score (MFG)	Score (MS)	Score (mass)	Score (iso. abund)	Score (iso. spacing)
	231.17	(M+H)+				85.92	99.91	97.04	44.58
		m/z	m/z (Calc)		Diff (ppm)	Height (Calc)	Height %	Height % (Calc)	Height Sum% (Calc)
		231.17	231.17		0.01	24842.6	100	100	88.5
65	HW_Dougles.d	DBSearch	Vernolepin	Anti tumor	C15 H16 O5	3.336	294.134	276.1	85.93	85.93	-0.14	Positive	2	17127	98876
Best	ID Source	Name	Formula		Score	RT Diff	Diff (ppm)	Score (Lib)	Score (DB)	Num Spectra	Precursor (Acq)
TRUE	DBSearch	Vernolepin	C15 H16 O5		85.93		-0.14		85.93	0
	m/z	Species	Ion Formula		Score (MFG)	Score (MS)	Score (mass)	Score (iso. abund)	Score (iso. spacing)
	294.134	(M+NH4)+				85.93	99.99	92.53	49.87
		m/z	m/z (Calc)		Diff (ppm)	Height (Calc)	Height %	Height % (Calc)	Height Sum% (Calc)
		294.134	294.134		-0.06	17181.2	100	100	85.5
66	HW_Dougles.d	DBSearch	Ammodendrine		C12 H20 N2 O	3.363	226.192	208.158	85.59	85.59	-1.85	Positive	2	28389	218033
Best	ID Source	Name	Formula		Score	RT Diff	Diff (ppm)	Score (Lib)	Score (DB)	Num Spectra	Precursor (Acq)
TRUE	DBSearch	Ammodendrine	C12 H20 N2 O		85.59		-1.85		85.59	0
	m/z	Species	Ion Formula		Score (MFG)	Score (MS)	Score (mass)	Score (iso. abund)	Score (iso. spacing)
	226.191	(M+NH4)+				85.59	98.53	96.56	46.53
		m/z	m/z (Calc)		Diff (ppm)	Height (Calc)	Height %	Height % (Calc)	Height Sum% (Calc)
		226.192	226.191		-1.29	28664.1	100	100	87.4
67	HW_Dougles.d	DBSearch	Leucyl-Hydroxyproline		C11 H20 N2 O4	3.459	245.15	244.143	85.42	85.42	-1.4	Positive	2	7311	42331
Best	ID Source	Name	Formula		Score	RT Diff	Diff (ppm)	Score (Lib)	Score (DB)	Num Spectra	Precursor (Acq)
TRUE	DBSearch	Leucyl-Hydroxyproline	C11 H20 N2 O4		85.42		-1.4		85.42	0
	m/z	Species	Ion Formula		Score (MFG)	Score (MS)	Score (mass)	Score (iso. abund)	Score (iso. spacing)
	245.15	(M+H)+				85.42	98.98	92.8	49.46
		m/z	m/z (Calc)		Diff (ppm)	Height (Calc)	Height %	Height % (Calc)	Height Sum% (Calc)
		245.15	245.15		-1.54	7421.3	100	100	88.5
68	HW_Dougles.d					4.566	239.149	238.142				Positive	3	14018	96534
69	HW_Dougles.d					5.523	259.166	258.158				Positive	4	69394	359226
70	HW_Dougles.d					5.602	272.197	271.19				Positive	2	20567	164373
71	HW_Dougles.d	DBSearch	3-Hydroxymonoethylglycylxylidide (3-Hydroxy-MEGX)		C12 H18 N2 O2	5.968	240.171	222.137	83.13	83.13	-1.21	Positive	2	11667	50871
Best	ID Source	Name	Formula		Score	RT Diff	Diff (ppm)	Score (Lib)	Score (DB)	Num Spectra	Precursor (Acq)
TRUE	DBSearch	3-Hydroxymonoethylglycylxylidide (3-Hydroxy-MEGX)	C12 H18 N2 O2		83.13		-1.21		83.13	0
	m/z	Species	Ion Formula		Score (MFG)	Score (MS)	Score (mass)	Score (iso. abund)	Score (iso. spacing)
	240.171	(M+NH4)+				83.13	99.32	86.77	46.39
		m/z	m/z (Calc)		Diff (ppm)	Height (Calc)	Height %	Height % (Calc)	Height Sum% (Calc)
		240.171	240.171		-0.67	11996.8	100	100	87.4
72	HW_Dougles.d					6.135	283.175	282.168				Positive	4	16743	97535
73	HW_Dougles.d					6.407	371.266	370.259				Positive	3	30547	143922
74	HW_Dougles.d	DBSearch	2,5-Dimethoxycinnamic acid		C11 H12 O4	6.459	209.081	208.074	86.18	86.18	-0.66	Positive	2	14441	58837
Best	ID Source	Name	Formula		Score	RT Diff	Diff (ppm)	Score (Lib)	Score (DB)	Num Spectra	Precursor (Acq)
TRUE	DBSearch	2,5-Dimethoxycinnamic acid	C11 H12 O4		86.18		-0.66		86.18	0
	m/z	Species	Ion Formula		Score (MFG)	Score (MS)	Score (mass)	Score (iso. abund)	Score (iso. spacing)
	209.081	(M+H)+				86.18	99.81	94.28	49.19
		m/z	m/z (Calc)		Diff (ppm)	Height (Calc)	Height %	Height % (Calc)	Height Sum% (Calc)
		209.081	209.081		-0.84	14620.5	100	100	89.1
75	HW_Dougles.d	DBSearch	N-Succinyl-2-amino-6-ketopimelate		C11 H15 N O8	6.461	312.069	289.079	47.28	47.28	1.06	Positive	2	2072	12280
Best	ID Source	Name	Formula		Score	RT Diff	Diff (ppm)	Score (Lib)	Score (DB)	Num Spectra	Precursor (Acq)
TRUE	DBSearch	N-Succinyl-2-amino-6-ketopimelate	C11 H15 N O8		47.28		1.06		47.28	0
	m/z	Species	Ion Formula		Score (MFG)	Score (MS)	Score (mass)	Score (iso. abund)	Score (iso. spacing)
	312.069	(M+Na)+				47.28	99.28	0	0
		m/z	m/z (Calc)		Diff (ppm)	Height (Calc)	Height %	Height % (Calc)	Height Sum% (Calc)
		312.069	312.069		0.99	2072.1	100	100	100
76	HW_Dougles.d	DBSearch	Zizybeoside I		C19 H28 O11	6.493	450.197	432.163	80.54	80.54	-0.52	Positive	2	12573	45558
Best	ID Source	Name	Formula		Score	RT Diff	Diff (ppm)	Score (Lib)	Score (DB)	Num Spectra	Precursor (Acq)
TRUE	DBSearch	Zizybeoside I	C19 H28 O11		80.54		-0.52		80.54	0
	m/z	Species	Ion Formula		Score (MFG)	Score (MS)	Score (mass)	Score (iso. abund)	Score (iso. spacing)
	450.197	(M+NH4)+				80.54	99.74	76.03	47.55
		m/z	m/z (Calc)		Diff (ppm)	Height (Calc)	Height %	Height % (Calc)	Height Sum% (Calc)
		450.197	450.197		-0.17	12707.6	100	100	82.2
77	HW_Dougles.d	DBSearch	Val Ile Leu		C17 H33 N3 O4	6.604	344.255	343.248	84.78	84.78	-1.39	Positive	3	39663	175994
Best	ID Source	Name	Formula		Score	RT Diff	Diff (ppm)	Score (Lib)	Score (DB)	Num Spectra	Precursor (Acq)
TRUE	DBSearch	Val Ile Leu	C17 H33 N3 O4		84.78		-1.39		84.78	3
	m/z	Species	Ion Formula		Score (MFG)	Score (MS)	Score (mass)	Score (iso. abund)	Score (iso. spacing)
	344.254	(M+H)+				84.78	98.53	91.08	49.69
		m/z	m/z (Calc)		Diff (ppm)	Height (Calc)	Height %	Height % (Calc)	Height Sum% (Calc)
		344.255	344.254		-1.5	39725.5	100	100	83.3
78	HW_Dougles.d					6.613	339.276	338.269				Positive	2	56912	236540
79	HW_Dougles.d	DBSearch	2,5-Dimethoxycinnamic acid		C11 H12 O4	6.645	209.081	208.074	86.59	86.59	-0.24	Positive	2	62941	236396
Best	ID Source	Name	Formula		Score	RT Diff	Diff (ppm)	Score (Lib)	Score (DB)	Num Spectra	Precursor (Acq)
TRUE	DBSearch	2,5-Dimethoxycinnamic acid	C11 H12 O4		86.59		-0.24		86.59	0
	m/z	Species	Ion Formula		Score (MFG)	Score (MS)	Score (mass)	Score (iso. abund)	Score (iso. spacing)
	209.081	(M+H)+				86.59	99.97	96.77	47.59
		m/z	m/z (Calc)		Diff (ppm)	Height (Calc)	Height %	Height % (Calc)	Height Sum% (Calc)
		209.081	209.081		0.03	62613.3	100	100	89.1
80	HW_Dougles.d					6.648	835.284	834.277				Positive	2	10892	38309
81	HW_Dougles.d	DBSearch	Perindoprilat	Hypertension activities	C17 H28 N2 O5	6.73	358.234	340.2	83.62	83.62	-1.31	Positive	2	19306	73941
Best	ID Source	Name	Formula		Score	RT Diff	Diff (ppm)	Score (Lib)	Score (DB)	Num Spectra	Precursor (Acq)
TRUE	DBSearch	Perindoprilat	C17 H28 N2 O5		83.62		-1.31		83.62	0
	m/z	Species	Ion Formula		Score (MFG)	Score (MS)	Score (mass)	Score (iso. abund)	Score (iso. spacing)
	358.234	(M+NH4)+				83.62	98.7	86.7	49.76
		m/z	m/z (Calc)		Diff (ppm)	Height (Calc)	Height %	Height % (Calc)	Height Sum% (Calc)
		358.234	358.234		-1.35	19558.1	100	100	83.3
82	HW_Dougles.d					6.814	344.231	326.196				Positive	3	20566	89118
83	HW_Dougles.d	DBSearch	W123		C17 H26 N2 O3	6.894	324.228	306.195	83.21	83.21	-1.11	Positive	2	20988	80215
Best	ID Source	Name	Formula		Score	RT Diff	Diff (ppm)	Score (Lib)	Score (DB)	Num Spectra	Precursor (Acq)
TRUE	DBSearch	W123	C17 H26 N2 O3		83.21		-1.11		83.21	0
	m/z	Species	Ion Formula		Score (MFG)	Score (MS)	Score (mass)	Score (iso. abund)	Score (iso. spacing)
	324.228	(M+NH4)+				83.21	99.17	84.99	49.13
		m/z	m/z (Calc)		Diff (ppm)	Height (Calc)	Height %	Height % (Calc)	Height Sum% (Calc)
		324.228	324.228		-0.82	21464.1	100	100	83.4
84	HW_Dougles.d	DBSearch	Pro Gln Pro		C15 H24 N4 O5	6.928	358.207	340.173	41	41	4.44	Positive	2	6867	20958
Best	ID Source	Name	Formula		Score	RT Diff	Diff (ppm)	Score (Lib)	Score (DB)	Num Spectra	Precursor (Acq)
TRUE	DBSearch	Pro Gln Pro	C15 H24 N4 O5		41		4.44		41	0
	m/z	Species	Ion Formula		Score (MFG)	Score (MS)	Score (mass)	Score (iso. abund)	Score (iso. spacing)
	358.209	(M+NH4)+				41	86.09	0	0
		m/z	m/z (Calc)		Diff (ppm)	Height (Calc)	Height %	Height % (Calc)	Height Sum% (Calc)
		358.207	358.209		4.22	6867.4	100	100	100
85	HW_Dougles.d	DBSearch	8Z-Decene-4,6-diynoic acid		C10 H10 O2	7.028	163.075	162.068	79.53	79.53	2.43	Positive	2	18557	62966
Best	ID Source	Name	Formula		Score	RT Diff	Diff (ppm)	Score (Lib)	Score (DB)	Num Spectra	Precursor (Acq)
TRUE	DBSearch	8Z-Decene-4,6-diynoic acid	C10 H10 O2		79.53		2.43		79.53	0
	m/z	Species	Ion Formula		Score (MFG)	Score (MS)	Score (mass)	Score (iso. abund)	Score (iso. spacing)
	163.075	(M+H)+				79.53	98.19	98.44	19.5
		m/z	m/z (Calc)		Diff (ppm)	Height (Calc)	Height %	Height % (Calc)	Height Sum% (Calc)
		163.075	163.075		3.82	18459.8	100	100	90.1
86	HW_Dougles.d					7.159	385.281	384.274				Positive	3	28779	144470
87	HW_Dougles.d					7.229	372.25	371.242				Positive	6	103629	478023
88	HW_Dougles.d					7.276	388.254	370.221				Positive	3	20660	88964
89	HW_Dougles.d	DBSearch	2-Phenylethyl 3-methylbutanoate		C13 H18 O2	7.292	207.138	206.131	85.77	85.77	0.38	Positive	2	19736	71626
Best	ID Source	Name	Formula		Score	RT Diff	Diff (ppm)	Score (Lib)	Score (DB)	Num Spectra	Precursor (Acq)
TRUE	DBSearch	2-Phenylethyl 3-methylbutanoate	C13 H18 O2		85.77		0.38		85.77	0
	m/z	Species	Ion Formula		Score (MFG)	Score (MS)	Score (mass)	Score (iso. abund)	Score (iso. spacing)
	207.138	(M+H)+				85.77	99.94	93.79	47.79
		m/z	m/z (Calc)		Diff (ppm)	Height (Calc)	Height %	Height % (Calc)	Height Sum% (Calc)
		207.138	207.138		0.02	20040.4	100	100	87.4
90	HW_Dougles.d					7.311	356.255	355.248				Positive	3	15430	130975
91	HW_Dougles.d					7.342	484.349	483.342				Positive	3	14858	74608
92	HW_Dougles.d	DBSearch	Crosatoside B		C20 H30 O11	7.386	464.212	446.179	78.11	78.11	0.27	Positive	2	8566	31918
Best	ID Source	Name	Formula		Score	RT Diff	Diff (ppm)	Score (Lib)	Score (DB)	Num Spectra	Precursor (Acq)
TRUE	DBSearch	Crosatoside B	C20 H30 O11		78.11		0.27		78.11	0
	m/z	Species	Ion Formula		Score (MFG)	Score (MS)	Score (mass)	Score (iso. abund)	Score (iso. spacing)
	464.213	(M+NH4)+				78.11	99.93	76.47	36.44
		m/z	m/z (Calc)		Diff (ppm)	Height (Calc)	Height %	Height % (Calc)	Height Sum% (Calc)
		464.212	464.213		1.1	8594.3	100	100	81.4
93	HW_Dougles.d	DBSearch	(R)-Roscovitine	treat cancers, neurodegenerative diseases, inflammation, viral infections, polycystic kidney disease and glomerulonephritis.	C19 H26 N6 O	7.452	372.25	354.216	84.72	84.72	1.05	Positive	2	7579	28624
Best	ID Source	Name	Formula		Score	RT Diff	Diff (ppm)	Score (Lib)	Score (DB)	Num Spectra	Precursor (Acq)
TRUE	DBSearch	(R)-Roscovitine	C19 H26 N6 O		84.72		1.05		84.72	3
	m/z	Species	Ion Formula		Score (MFG)	Score (MS)	Score (mass)	Score (iso. abund)	Score (iso. spacing)
	372.251	(M+NH4)+				84.72	99.13	90.87	48.53
		m/z	m/z (Calc)		Diff (ppm)	Height (Calc)	Height %	Height % (Calc)	Height Sum% (Calc)
		372.25	372.251		0.73	7486.6	100	100	81
94	HW_Dougles.d					7.454	452.36	451.353				Positive	5	43723	201142
95	HW_Dougles.d					7.504	457.339	456.332				Positive	3	23011	108758
96	HW_Dougles.d	DBSearch	Phlorisobutyrophenone		C10 H12 O4	7.541	197.081	196.073	86.06	86.06	1.76	Positive	2	25967	82869
Best	ID Source	Name	Formula		Score	RT Diff	Diff (ppm)	Score (Lib)	Score (DB)	Num Spectra	Precursor (Acq)
TRUE	DBSearch	Phlorisobutyrophenone	C10 H12 O4		86.06		1.76		86.06	0
	m/z	Species	Ion Formula		Score (MFG)	Score (MS)	Score (mass)	Score (iso. abund)	Score (iso. spacing)
	197.081	(M+H)+				86.06	98.77	95.03	49.89
		m/z	m/z (Calc)		Diff (ppm)	Height (Calc)	Height %	Height % (Calc)	Height Sum% (Calc)
		197.081	197.081		1.81	26267.8	100	100	90
97	HW_Dougles.d	DBSearch	Funtumine	induce cell Death in cancer cells	C21 H35 N O	7.557	340.26	317.271	80.5	80.5	2.91	Positive	2	8610	29161
Best	ID Source	Name	Formula		Score	RT Diff	Diff (ppm)	Score (Lib)	Score (DB)	Num Spectra	Precursor (Acq)
TRUE	DBSearch	Funtumine	C21 H35 N O		80.5		2.91		80.5	0
	m/z	Species	Ion Formula		Score (MFG)	Score (MS)	Score (mass)	Score (iso. abund)	Score (iso. spacing)
	340.261	(M+Na)+				80.5	94.21	83.06	49.99
		m/z	m/z (Calc)		Diff (ppm)	Height (Calc)	Height %	Height % (Calc)	Height Sum% (Calc)
		340.26	340.261		2.73	8323.9	100	100	81
98	HW_Dougles.d	DBSearch	PE(16:0/0:0)		C21 H44 N O7 P	7.607	471.319	453.285	75.27	75.27	1.3	Positive	2	8377	35224
Best	ID Source	Name	Formula		Score	RT Diff	Diff (ppm)	Score (Lib)	Score (DB)	Num Spectra	Precursor (Acq)
TRUE	DBSearch	PE(16:0/0:0)	C21 H44 N O7 P		75.27		1.3		75.27	0
	m/z	Species	Ion Formula		Score (MFG)	Score (MS)	Score (mass)	Score (iso. abund)	Score (iso. spacing)
	471.319	(M+NH4)+				75.27	98.34	59.46	48.12
		m/z	m/z (Calc)		Diff (ppm)	Height (Calc)	Height %	Height % (Calc)	Height Sum% (Calc)
		471.319	471.319		0.9	8761.1	100	100	80.5
99	HW_Dougles.d					7.608	353.255	352.248				Positive	2	14805	50907
100	HW_Dougles.d					7.633	432.281	414.247				Positive	3	19924	84132
101	HW_Dougles.d	DBSearch	Acebutolol	High blood pressure treatment	C18 H28 N2 O4	7.696	354.24	336.205	67.31	67.31	-1.9	Positive	2	4792	24710
Best	ID Source	Name	Formula		Score	RT Diff	Diff (ppm)	Score (Lib)	Score (DB)	Num Spectra	Precursor (Acq)
TRUE	DBSearch	Acebutolol	C18 H28 N2 O4		67.31		-1.9		67.31	3
	m/z	Species	Ion Formula		Score (MFG)	Score (MS)	Score (mass)	Score (iso. abund)	Score (iso. spacing)
	354.239	(M+NH4)+				67.31	97.32	59.93	16.15
		m/z	m/z (Calc)		Diff (ppm)	Height (Calc)	Height %	Height % (Calc)	Height Sum% (Calc)
		354.24	354.239		-4.15	5058.5	100	100	82.6
102	HW_Dougles.d	DBSearch	8Z-Decene-4,6-diynoic acid		C10 H10 O2	7.713	163.076	162.068	87.14	87.14	-0.82	Positive	2	10853	33092
Best	ID Source	Name	Formula		Score	RT Diff	Diff (ppm)	Score (Lib)	Score (DB)	Num Spectra	Precursor (Acq)
TRUE	DBSearch	8Z-Decene-4,6-diynoic acid	C10 H10 O2		87.14		-0.82		87.14	0
	m/z	Species	Ion Formula		Score (MFG)	Score (MS)	Score (mass)	Score (iso. abund)	Score (iso. spacing)
	163.075	(M+H)+				87.14	99.79	98.53	48.16
		m/z	m/z (Calc)		Diff (ppm)	Height (Calc)	Height %	Height % (Calc)	Height Sum% (Calc)
		163.076	163.075		-1.1	10879.9	100	100	90.1
103	HW_Dougles.d	DBSearch	Palmitoyl Serotonin		C26 H42 N2 O2	7.716	437.312	414.323	74.97	74.97	4.03	Positive	2	13174	51490
Best	ID Source	Name	Formula		Score	RT Diff	Diff (ppm)	Score (Lib)	Score (DB)	Num Spectra	Precursor (Acq)
TRUE	DBSearch	Palmitoyl Serotonin	C26 H42 N2 O2		74.97		4.03		74.97	6
	m/z	Species	Ion Formula		Score (MFG)	Score (MS)	Score (mass)	Score (iso. abund)	Score (iso. spacing)
	437.314	(M+Na)+				74.97	86.15	81.09	45.25
		m/z	m/z (Calc)		Diff (ppm)	Height (Calc)	Height %	Height % (Calc)	Height Sum% (Calc)
		437.312	437.314		3.25	13064	100	100	77.3
104	HW_Dougles.d					7.745	446.26	445.253				Positive	2	6493	23751
105	HW_Dougles.d	DBSearch	17beta-Amino-5alpha-androstan-11beta-ol		C19 H33 N O	7.783	314.245	291.256	84.54	84.54	0.43	Positive	2	7175	25625
Best	ID Source	Name	Formula		Score	RT Diff	Diff (ppm)	Score (Lib)	Score (DB)	Num Spectra	Precursor (Acq)
TRUE	DBSearch	17beta-Amino-5alpha-androstan-11beta-ol	C19 H33 N O		84.54		0.43		84.54	0
	m/z	Species	Ion Formula		Score (MFG)	Score (MS)	Score (mass)	Score (iso. abund)	Score (iso. spacing)
	314.245	(M+Na)+				84.54	99.88	91.87	45.04
		m/z	m/z (Calc)		Diff (ppm)	Height (Calc)	Height %	Height % (Calc)	Height Sum% (Calc)
		314.245	314.245		0.95	7234.7	100	100	82.4
106	HW_Dougles.d					7.836	498.365	497.358				Positive	3	15246	73358
107	HW_Dougles.d	DBSearch	1-(O-alpha-D-glucopyranosyl)-3-keto-(1,25R)-hexacosanediol		C32 H62 O8	7.876	597.434	574.445	46.48	46.48	-1.41	Positive	2	4288	33741
Best	ID Source	Name	Formula		Score	RT Diff	Diff (ppm)	Score (Lib)	Score (DB)	Num Spectra	Precursor (Acq)
TRUE	DBSearch	1-(O-alpha-D-glucopyranosyl)-3-keto-(1,25R)-hexacosanediol	C32 H62 O8		46.48		-1.41		46.48	0
	m/z	Species	Ion Formula		Score (MFG)	Score (MS)	Score (mass)	Score (iso. abund)	Score (iso. spacing)
	597.434	(M+Na)+				46.48	97.61	0	0
		m/z	m/z (Calc)		Diff (ppm)	Height (Calc)	Height %	Height % (Calc)	Height Sum% (Calc)
		597.434	597.434		-1.36	4288.3	100	100	100
108	HW_Dougles.d					7.914	215.175	214.168				Positive	7	218755	985981
109	HW_Dougles.d					7.915	114.091	113.083				Positive	3	38892	155800
110	HW_Dougles.d	DBSearch	Arg Arg Gln		C17 H34 N10 O5	7.926	476.307	458.273	75.73	75.73	-4	Positive	3	19783	77893
Best	ID Source	Name	Formula		Score	RT Diff	Diff (ppm)	Score (Lib)	Score (DB)	Num Spectra	Precursor (Acq)
TRUE	DBSearch	Arg Arg Gln	C17 H34 N10 O5		75.73		-4		75.73	0
	m/z	Species	Ion Formula		Score (MFG)	Score (MS)	Score (mass)	Score (iso. abund)	Score (iso. spacing)
	476.305	(M+NH4)+				75.73	85.08	83.25	48.02
		m/z	m/z (Calc)		Diff (ppm)	Height (Calc)	Height %	Height % (Calc)	Height Sum% (Calc)
		476.307	476.305		-3.55	20009.7	100	100	81.3
111	HW_Dougles.d					7.932	507.316	242.163				Positive	2	3702	31039
112	HW_Dougles.d	DBSearch	PE(17:0/0:0)		C22 H46 N O7 P	7.935	485.334	467.3	90.98	90.98	2.31	Positive	3	29656	143964
Best	ID Source	Name	Formula		Score	RT Diff	Diff (ppm)	Score (Lib)	Score (DB)	Num Spectra	Precursor (Acq)
TRUE	DBSearch	PE(17:0/0:0)	C22 H46 N O7 P		90.98		2.31		90.98	0
	m/z	Species	Ion Formula		Score (MFG)	Score (MS)	Score (mass)	Score (iso. abund)	Score (iso. spacing)
	485.335	(M+NH4)+				90.98	94.7	82.57	93.65
		m/z	m/z (Calc)		Diff (ppm)	Height (Calc)	Height %	Height % (Calc)	Height Sum% (Calc)
		485.334	485.335		2.68	31400.3	100	100	77
113	HW_Dougles.d					7.961	565.444	564.438				Positive	4	19231	141491
114	HW_Dougles.d					8.052	469.339	468.331				Positive	2	15056	109905
115	HW_Dougles.d	DBSearch	Apigenin 7-glucuronosyl-(1->2)-glucuronide		C27 H26 O17	8.071	623.123	622.116	95.83	95.83	1.56	Positive	3	23458	116332
Best	ID Source	Name	Formula		Score	RT Diff	Diff (ppm)	Score (Lib)	Score (DB)	Num Spectra	Precursor (Acq)
TRUE	DBSearch	Apigenin 7-glucuronosyl-(1->2)-glucuronide	C27 H26 O17		95.83		1.56		95.83	0
	m/z	Species	Ion Formula		Score (MFG)	Score (MS)	Score (mass)	Score (iso. abund)	Score (iso. spacing)
	623.124	(M+H)+				95.83	96.9	94.2	95.66
		m/z	m/z (Calc)		Diff (ppm)	Height (Calc)	Height %	Height % (Calc)	Height Sum% (Calc)
		623.123	623.124		1.51	24017.9	100	100	72.4
116	HW_Dougles.d	DBSearch	Solanocapsine		C27 H46 N2 O2	8.124	453.344	430.354	74.26	74.26	4.12	Positive	2	10943	68747
Best	ID Source	Name	Formula		Score	RT Diff	Diff (ppm)	Score (Lib)	Score (DB)	Num Spectra	Precursor (Acq)
TRUE	DBSearch	Solanocapsine	C27 H46 N2 O2		74.26		4.12		74.26	0
	m/z	Species	Ion Formula		Score (MFG)	Score (MS)	Score (mass)	Score (iso. abund)	Score (iso. spacing)
	453.345	(M+Na)+				74.26	85.07	77.11	49.21
		m/z	m/z (Calc)		Diff (ppm)	Height (Calc)	Height %	Height % (Calc)	Height Sum% (Calc)
		453.344	453.345		3.68	10977	100	100	76.6
117	HW_Dougles.d	DBSearch	2-{2-[4[(2-Hydroxy-3-isopropylaminopropoxy)-benzyloxy]ethoxy}-propionic acid		C18 H29 N O6	8.159	373.234	355.2	83.26	83.26	-1.44	Positive	2	19629	72890
Best	ID Source	Name	Formula		Score	RT Diff	Diff (ppm)	Score (Lib)	Score (DB)	Num Spectra	Precursor (Acq)
TRUE	DBSearch	2-{2-[4[(2-Hydroxy-3-isopropylaminopropoxy)-benzyloxy]ethoxy}-propionic acid	C18 H29 N O6		83.26		-1.44		83.26	0
	m/z	Species	Ion Formula		Score (MFG)	Score (MS)	Score (mass)	Score (iso. abund)	Score (iso. spacing)
	373.233	(M+NH4)+				83.26	98.36	85.9	49.89
		m/z	m/z (Calc)		Diff (ppm)	Height (Calc)	Height %	Height % (Calc)	Height Sum% (Calc)
		373.234	373.233		-1.3	19796.6	100	100	82.8
118	HW_Dougles.d					8.177	520.333	519.325				Positive	2	18096	67498
119	HW_Dougles.d					8.219	550.397	549.39				Positive	3	7829	34151
120	HW_Dougles.d	DBSearch	Loganin	neuroprotective and anti-inflammatory	C17 H26 O10	8.222	408.186	390.153	82.48	82.48	0.09	Positive	7	12859	110909
Best	ID Source	Name	Formula		Score	RT Diff	Diff (ppm)	Score (Lib)	Score (DB)	Num Spectra	Precursor (Acq)
TRUE	DBSearch	Loganin	C17 H26 O10		82.48		0.09		82.48	0
	m/z	Species	Ion Formula		Score (MFG)	Score (MS)	Score (mass)	Score (iso. abund)	Score (iso. spacing)
	408.186	(M+NH4)+				82.48	99.99	80.68	49.64
		m/z	m/z (Calc)		Diff (ppm)	Height (Calc)	Height %	Height % (Calc)	Height Sum% (Calc)
		408.186	408.186		0.21	13001.2	100	100	83.7
121	HW_Dougles.d	DBSearch	Methylorsellinic Acid, Ethyl Ester		C11 H14 O4	8.223	211.096	210.089	86.66	86.66	0.24	Positive	2	61187	207533
Best	ID Source	Name	Formula		Score	RT Diff	Diff (ppm)	Score (Lib)	Score (DB)	Num Spectra	Precursor (Acq)
TRUE	DBSearch	Methylorsellinic Acid, Ethyl Ester	C11 H14 O4		86.66		0.24		86.66	3
	m/z	Species	Ion Formula		Score (MFG)	Score (MS)	Score (mass)	Score (iso. abund)	Score (iso. spacing)
	211.096	(M+H)+				86.66	99.97	95.13	49.85
		m/z	m/z (Calc)		Diff (ppm)	Height (Calc)	Height %	Height % (Calc)	Height Sum% (Calc)
		211.096	211.096		0.17	61788.6	100	100	89.1
122	HW_Dougles.d	DBSearch	Depdecin		C11 H16 O5	8.223	229.107	228.1	85.57	85.57	-1.28	Positive	2	18787	59819
Best	ID Source	Name	Formula		Score	RT Diff	Diff (ppm)	Score (Lib)	Score (DB)	Num Spectra	Precursor (Acq)
TRUE	DBSearch	Depdecin	C11 H16 O5		85.57		-1.28		85.57	0
	m/z	Species	Ion Formula		Score (MFG)	Score (MS)	Score (mass)	Score (iso. abund)	Score (iso. spacing)
	229.107	(M+H)+				85.57	99.21	95.94	45.84
		m/z	m/z (Calc)		Diff (ppm)	Height (Calc)	Height %	Height % (Calc)	Height Sum% (Calc)
		229.107	229.107		-0.91	18795.8	100	100	89.1
123	HW_Dougles.d	DBSearch	3-(3-Indolyl)-2-oxopropanoic acid		C11 H9 N O3	8.224	445.08	203.059	44.37	44.37	-4.11	Positive	2	3517	29312
Best	ID Source	Name	Formula		Score	RT Diff	Diff (ppm)	Score (Lib)	Score (DB)	Num Spectra	Precursor (Acq)
TRUE	DBSearch	3-(3-Indolyl)-2-oxopropanoic acid	C11 H9 N O3		44.37		-4.11		44.37	6
	m/z	Species	Ion Formula		Score (MFG)	Score (MS)	Score (mass)	Score (iso. abund)	Score (iso. spacing)
	445.08	(2M+K)+				44.37	93.18	0	0
		m/z	m/z (Calc)		Diff (ppm)	Height (Calc)	Height %	Height % (Calc)	Height Sum% (Calc)
		445.08	445.08		-1.87	3517.1	100	100	100
124	HW_Dougles.d					8.273	355.764	709.511				Positive	3	5692	33254
125	HW_Dougles.d					8.285	611.449	305.221				Positive	4	7954	84019
126	HW_Dougles.d					8.308	467.328	466.32				Positive	3	6524	40773
127	HW_Dougles.d					8.325	339.768	677.521				Positive	5	19093	123202
128	HW_Dougles.d					8.386	598.417	597.41				Positive	7	30034	196185
129	HW_Dougles.d					8.399	564.359	563.352				Positive	2	15220	58857
130	HW_Dougles.d	DBSearch	PE-Cer(d14:1(4E)/20:0)		C36 H73 N2 O6 P	8.413	683.508	660.519	69.62	69.62	2.54	Positive	3	4393	41998
Best	ID Source	Name	Formula		Score	RT Diff	Diff (ppm)	Score (Lib)	Score (DB)	Num Spectra	Precursor (Acq)
TRUE	DBSearch	PE-Cer(d14:1(4E)/20:0)	C36 H73 N2 O6 P		69.62		2.54		69.62	0
	m/z	Species	Ion Formula		Score (MFG)	Score (MS)	Score (mass)	Score (iso. abund)	Score (iso. spacing)
	683.51	(M+Na)+				69.62	91.72	49.89	49.08
		m/z	m/z (Calc)		Diff (ppm)	Height (Calc)	Height %	Height % (Calc)	Height Sum% (Calc)
		683.508	683.51		2.69	4229.9	100	100	71.1
131	HW_Dougles.d	DBSearch	Megastachine		C20 H29 N O3	8.507	349.247	331.213	40.59	40.59	4.65	Positive	2	2083	15568
Best	ID Source	Name	Formula		Score	RT Diff	Diff (ppm)	Score (Lib)	Score (DB)	Num Spectra	Precursor (Acq)
TRUE	DBSearch	Megastachine	C20 H29 N O3		40.59		4.65		40.59	0
	m/z	Species	Ion Formula		Score (MFG)	Score (MS)	Score (mass)	Score (iso. abund)	Score (iso. spacing)
	349.249	(M+NH4)+				40.59	85.25	0	0
		m/z	m/z (Calc)		Diff (ppm)	Height (Calc)	Height %	Height % (Calc)	Height Sum% (Calc)
		349.247	349.249		4.41	2082.7	100	100	100
132	HW_Dougles.d					8.581	412.306	822.598				Positive	2	4407	20619
133	HW_Dougles.d					8.59	663.481	331.237				Positive	2	3177	21239
134	HW_Dougles.d					8.596	608.386	607.378				Positive	2	12552	46734
135	HW_Dougles.d	DBSearch	PG(O-20:0/18:1(9Z))		C44 H87 O9 P	8.607	396.31	790.605	83.84	83.84	4.34	Positive	3	12480	65612
Best	ID Source	Name	Formula		Score	RT Diff	Diff (ppm)	Score (Lib)	Score (DB)	Num Spectra	Precursor (Acq)
TRUE	DBSearch	PG(O-20:0/18:1(9Z))	C44 H87 O9 P		83.84		4.34		83.84	0
	m/z	Species	Ion Formula		Score (MFG)	Score (MS)	Score (mass)	Score (iso. abund)	Score (iso. spacing)
	396.312	(M+2H)+2				83.84	75.21	84.95	99.77
		m/z	m/z (Calc)		Diff (ppm)	Height (Calc)	Height %	Height % (Calc)	Height Sum% (Calc)
		396.31	396.312		4.16	13063.3	100	100	61.5
136	HW_Dougles.d	DBSearch	PE(18:3(9Z,12Z,15Z)/P-18:1(9Z))		C41 H74 N O7 P	8.617	362.769	723.523	59.58	59.58	-3.19	Positive	3	4387	24584
Best	ID Source	Name	Formula		Score	RT Diff	Diff (ppm)	Score (Lib)	Score (DB)	Num Spectra	Precursor (Acq)
TRUE	DBSearch	PE(18:3(9Z,12Z,15Z)/P-18:1(9Z))	C41 H74 N O7 P		59.58		-3.19		59.58	0
	m/z	Species	Ion Formula		Score (MFG)	Score (MS)	Score (mass)	Score (iso. abund)	Score (iso. spacing)
	362.767	(M+2H)+2				59.58	86.44	30.74	40.47
		m/z	m/z (Calc)		Diff (ppm)	Height (Calc)	Height %	Height % (Calc)	Height Sum% (Calc)
		362.769	362.767		-4.48	4420.7	100	100	68.6
137	HW_Dougles.d					8.664	566.426	565.419				Positive	7	45609	264006
138	HW_Dougles.d	DBSearch	(22E)-(25S)-26,26,26-trifluoro-1α,25-dihydroxy-22,23-didehydrovitamin D3 / (22E)-(25S)-26,26,26-trifluoro-1α,25-dihydroxy-22,23-didehydrocholecalciferol		C27 H39 F3 O3	8.683	486.317	468.283	68.33	68.33	4.61	Positive	2	8942	35529
Best	ID Source	Name	Formula		Score	RT Diff	Diff (ppm)	Score (Lib)	Score (DB)	Num Spectra	Precursor (Acq)
TRUE	DBSearch	(22E)-(25S)-26,26,26-trifluoro-1α,25-dihydroxy-22,23-didehydrovitamin D3 / (22E)-(25S)-26,26,26-trifluoro-1α,25-dihydroxy-22,23-didehydrocholecalciferol	C27 H39 F3 O3		68.33		4.61		68.33	0
	m/z	Species	Ion Formula		Score (MFG)	Score (MS)	Score (mass)	Score (iso. abund)	Score (iso. spacing)
	486.319	(M+NH4)+				68.33	80.42	75.38	35.67
		m/z	m/z (Calc)		Diff (ppm)	Height (Calc)	Height %	Height % (Calc)	Height Sum% (Calc)
		486.317	486.319		3.36	8998.3	100	100	76.8
139	HW_Dougles.d					8.711	580.408	579.401				Positive	3	4380	28624
140	HW_Dougles.d					8.724	356.255	710.495				Positive	6	15371	132679
141	HW_Dougles.d					8.776	652.413	317.189				Positive	3	8429	73514
142	HW_Dougles.d					8.818	328.26	327.252				Positive	6	234438	1064411
143	HW_Dougles.d	DBSearch	PS(22:0/22:0)		C50 H98 N O10 P	8.838	452.853	903.69	50.87	50.87	3.34	Positive	2	4960	24299
Best	ID Source	Name	Formula		Score	RT Diff	Diff (ppm)	Score (Lib)	Score (DB)	Num Spectra	Precursor (Acq)
TRUE	DBSearch	PS(22:0/22:0)	C50 H98 N O10 P		50.87		3.34		50.87	0
	m/z	Species	Ion Formula		Score (MFG)	Score (MS)	Score (mass)	Score (iso. abund)	Score (iso. spacing)
	452.854	(M+2H)+2				50.87	83.32	10.37	34.57
		m/z	m/z (Calc)		Diff (ppm)	Height (Calc)	Height %	Height % (Calc)	Height Sum% (Calc)
		452.853	452.854		1.54	5015.8	100	100	64.1
144	HW_Dougles.d					8.871	695.505	694.499				Positive	4	3695	35709
145	HW_Dougles.d					8.885	419.313	836.612				Positive	2	3026	13228
146	HW_Dougles.d	DBSearch	3-(2,5-Dimethoxyphenyl)propanoic acid		C11 H14 O4	8.91	211.097	210.09	83.47	83.47	-3.89	Positive	2	17611	73064
Best	ID Source	Name	Formula		Score	RT Diff	Diff (ppm)	Score (Lib)	Score (DB)	Num Spectra	Precursor (Acq)
TRUE	DBSearch	3-(2,5-Dimethoxyphenyl)propanoic acid	C11 H14 O4		83.47		-3.89		83.47	1
	m/z	Species	Ion Formula		Score (MFG)	Score (MS)	Score (mass)	Score (iso. abund)	Score (iso. spacing)
	211.096	(M+H)+				83.47	93.58	96.77	47.29
		m/z	m/z (Calc)		Diff (ppm)	Height (Calc)	Height %	Height % (Calc)	Height Sum% (Calc)
		211.097	211.096		-3.57	17638.7	100	100	89.1
147	HW_Dougles.d					8.987	412.797	823.579				Positive	5	15207	99473
148	HW_Dougles.d					9	693.492	346.242				Positive	3	3181	34901
149	HW_Dougles.d	DBSearch	DAT(18:0/24:0(2Me[S],3OH[S],4Me[S],6Me[S]))		C57 H108 O14	9.026	509.396	1016.78	54.01	54.01	-2.57	Positive	2	2141	8892
Best	ID Source	Name	Formula		Score	RT Diff	Diff (ppm)	Score (Lib)	Score (DB)	Num Spectra	Precursor (Acq)
TRUE	DBSearch	DAT(18:0/24:0(2Me[S],3OH[S],4Me[S],6Me[S]))	C57 H108 O14		54.01		-2.57		54.01	0
	m/z	Species	Ion Formula		Score (MFG)	Score (MS)	Score (mass)	Score (iso. abund)	Score (iso. spacing)
	509.394	(M+2H)+2				54.01	89.13	2.61	45.45
		m/z	m/z (Calc)		Diff (ppm)	Height (Calc)	Height %	Height % (Calc)	Height Sum% (Calc)
		509.396	509.394		-3.5	2198.5	100	100	61.2
150	HW_Dougles.d					9.052	679.924	678.917				Positive	2	2652	11248
151	HW_Dougles.d	DBSearch	GlcCer(d18:0/16:0)		C40 H79 N O8	9.054	724.57	701.58	68.94	68.94	0.71	Positive	2	5353	27146
Best	ID Source	Name	Formula		Score	RT Diff	Diff (ppm)	Score (Lib)	Score (DB)	Num Spectra	Precursor (Acq)
TRUE	DBSearch	GlcCer(d18:0/16:0)	C40 H79 N O8		68.94		0.71		68.94	0
	m/z	Species	Ion Formula		Score (MFG)	Score (MS)	Score (mass)	Score (iso. abund)	Score (iso. spacing)
	724.57	(M+Na)+				68.94	99.29	37.34	46.14
		m/z	m/z (Calc)		Diff (ppm)	Height (Calc)	Height %	Height % (Calc)	Height Sum% (Calc)
		724.57	724.57		0.14	5238.6	100	100	69
152	HW_Dougles.d					9.054	679.511	678.505				Positive	11	112674	1034703
153	HW_Dougles.d	DBSearch	Calenduloside G methyl ester		C43 H68 O14	9.055	831.452	808.464	49.82	49.82	-3.76	Positive	2	2805	14023
Best	ID Source	Name	Formula		Score	RT Diff	Diff (ppm)	Score (Lib)	Score (DB)	Num Spectra	Precursor (Acq)
TRUE	DBSearch	Calenduloside G methyl ester	C43 H68 O14		49.82		-3.76		49.82	0
	m/z	Species	Ion Formula		Score (MFG)	Score (MS)	Score (mass)	Score (iso. abund)	Score (iso. spacing)
	831.45	(M+Na)+				49.82	80.5	22.13	21.69
		m/z	m/z (Calc)		Diff (ppm)	Height (Calc)	Height %	Height % (Calc)	Height Sum% (Calc)
		831.452	831.45		-1.67	2786.9	100	100	67.6
154	HW_Dougles.d					9.09	379.249	739.458				Positive	4	5218	39512
155	HW_Dougles.d					9.092	740.466	361.216				Positive	2	2601	21543
156	HW_Dougles.d	DBSearch	Acacetin 7-glucuronide		C22 H20 O11	9.108	461.108	460.101	47.4	47.4	-0.68	Positive	3	4545	39900
Best	ID Source	Name	Formula		Score	RT Diff	Diff (ppm)	Score (Lib)	Score (DB)	Num Spectra	Precursor (Acq)
TRUE	DBSearch	Acacetin 7-glucuronide	C22 H20 O11		47.4		-0.68		47.4	0
	m/z	Species	Ion Formula		Score (MFG)	Score (MS)	Score (mass)	Score (iso. abund)	Score (iso. spacing)
	461.108	(M+H)+				47.4	99.53	0	0
		m/z	m/z (Calc)		Diff (ppm)	Height (Calc)	Height %	Height % (Calc)	Height Sum% (Calc)
		461.108	461.108		-0.68	4545.4	100	100	100
157	HW_Dougles.d	DBSearch	Catechin 5-O-gallate		C22 H18 O10	9.109	443.099	442.091	77.52	77.52	-2.95	Positive	2	7064	27705
Best	ID Source	Name	Formula		Score	RT Diff	Diff (ppm)	Score (Lib)	Score (DB)	Num Spectra	Precursor (Acq)
TRUE	DBSearch	Catechin 5-O-gallate	C22 H18 O10		77.52		-2.95		77.52	0
	m/z	Species	Ion Formula		Score (MFG)	Score (MS)	Score (mass)	Score (iso. abund)	Score (iso. spacing)
	443.097	(M+H)+				77.52	91.88	77.25	49.13
		m/z	m/z (Calc)		Diff (ppm)	Height (Calc)	Height %	Height % (Calc)	Height Sum% (Calc)
		443.099	443.097		-2.74	6976.1	100	100	80.4
158	HW_Dougles.d	DBSearch	4-(2-hydroxypropoxy)-3,5-dimethyl-Phenol		C11 H16 O3	9.113	197.117	196.11	83.69	83.69	0.21	Positive	2	11790	43744
Best	ID Source	Name	Formula		Score	RT Diff	Diff (ppm)	Score (Lib)	Score (DB)	Num Spectra	Precursor (Acq)
TRUE	DBSearch	4-(2-hydroxypropoxy)-3,5-dimethyl-Phenol	C11 H16 O3		83.69		0.21		83.69	0
	m/z	Species	Ion Formula		Score (MFG)	Score (MS)	Score (mass)	Score (iso. abund)	Score (iso. spacing)
	197.117	(M+H)+				83.69	99.98	91.34	41.93
		m/z	m/z (Calc)		Diff (ppm)	Height (Calc)	Height %	Height % (Calc)	Height Sum% (Calc)
		197.117	197.117		0.88	12034.6	100	100	89.1
159	HW_Dougles.d					9.124	404.8	807.586				Positive	3	4072	33571
160	HW_Dougles.d	DBSearch	PI(20:0/21:0)		C50 H97 O13 P	9.202	469.339	936.662	79.8	79.8	4.62	Positive	3	8281	46662
Best	ID Source	Name	Formula		Score	RT Diff	Diff (ppm)	Score (Lib)	Score (DB)	Num Spectra	Precursor (Acq)
TRUE	DBSearch	PI(20:0/21:0)	C50 H97 O13 P		79.8		4.62		79.8	0
	m/z	Species	Ion Formula		Score (MFG)	Score (MS)	Score (mass)	Score (iso. abund)	Score (iso. spacing)
	469.341	(M+2H)+2				79.8	70	85.82	92.19
		m/z	m/z (Calc)		Diff (ppm)	Height (Calc)	Height %	Height % (Calc)	Height Sum% (Calc)
		469.339	469.341		3.82	8418.1	100	100	57.6
161	HW_Dougles.d	DBSearch	PE(18:4(6Z,9Z,12Z,15Z)/22:6(4Z,7Z,10Z,13Z,16Z,19Z))		C45 H70 N O8 P	9.228	401.263	783.485	66.04	66.04	-0.88	Positive	5	6997	51768
Best	ID Source	Name	Formula		Score	RT Diff	Diff (ppm)	Score (Lib)	Score (DB)	Num Spectra	Precursor (Acq)
TRUE	DBSearch	PE(18:4(6Z,9Z,12Z,15Z)/22:6(4Z,7Z,10Z,13Z,16Z,19Z))	C45 H70 N O8 P		66.04		-0.88		66.04	0
	m/z	Species	Ion Formula		Score (MFG)	Score (MS)	Score (mass)	Score (iso. abund)	Score (iso. spacing)
	401.262	(M+H+H4N)+2				66.04	98.85	25.28	49.35
		m/z	m/z (Calc)		Diff (ppm)	Height (Calc)	Height %	Height % (Calc)	Height Sum% (Calc)
		401.263	401.262		-1.16	6826	100	100	66.4
162	HW_Dougles.d	DBSearch	N-(3-Oxododecanoyl)homoserine lactone	a pivotal QS molecule, which regulates numerous virulence genes in P. aeruginosa and exhibits broad biological modulation effects in mammalian cells.	C16 H27 N O4	9.233	315.228	297.194	83.91	83.91	-1.26	Positive	2	14446	50047
Best	ID Source	Name	Formula		Score	RT Diff	Diff (ppm)	Score (Lib)	Score (DB)	Num Spectra	Precursor (Acq)
TRUE	DBSearch	N-(3-Oxododecanoyl)homoserine lactone	C16 H27 N O4		83.91		-1.26		83.91	0
	m/z	Species	Ion Formula		Score (MFG)	Score (MS)	Score (mass)	Score (iso. abund)	Score (iso. spacing)
	315.228	(M+NH4)+				83.91	98.96	88.24	48.61
		m/z	m/z (Calc)		Diff (ppm)	Height (Calc)	Height %	Height % (Calc)	Height Sum% (Calc)
		315.228	315.228		-0.92	14683.1	100	100	84.4
163	HW_Dougles.d					9.235	403.792	805.568				Positive	3	3320	19604
164	HW_Dougles.d					9.29	441.344	440.337				Positive	6	125836	627087
165	HW_Dougles.d					9.329	397.124	792.234				Positive	2	2182	8034
166	HW_Dougles.d					9.331	396.802	791.589				Positive	13	110888	1208662
167	HW_Dougles.d	DBSearch	c		C51 H90 O7	9.331	837.655	814.665	49.01	49.01	4.71	Positive	2	3714	15914
Best	ID Source	Name	Formula		Score	RT Diff	Diff (ppm)	Score (Lib)	Score (DB)	Num Spectra	Precursor (Acq)
TRUE	DBSearch	Sitoindoside I	C51 H90 O7		49.01		4.71		49.01	0
	m/z	Species	Ion Formula		Score (MFG)	Score (MS)	Score (mass)	Score (iso. abund)	Score (iso. spacing)
	837.658	(M+Na)+				49.01	71.04	16.54	43.94
		m/z	m/z (Calc)		Diff (ppm)	Height (Calc)	Height %	Height % (Calc)	Height Sum% (Calc)
		837.655	837.658		3.81	3591.8	100	100	63.9
168	HW_Dougles.d	DBSearch	Halstoctacosanolide A	Antimicrobial metabolite	C48 H76 O12	9.351	423.275	844.527	27.68	27.68	8.55	Positive	3	7234	55933
Best	ID Source	Name	Formula		Score	RT Diff	Diff (ppm)	Score (Lib)	Score (DB)	Num Spectra	Precursor (Acq)
TRUE	DBSearch	Halstoctacosanolide A	C48 H76 O12		27.68		8.55		27.68	0
	m/z	Species	Ion Formula		Score (MFG)	Score (MS)	Score (mass)	Score (iso. abund)	Score (iso. spacing)
	423.274	(M+2H)+2				27.68	31.64	26.97	20.61
		m/z	m/z (Calc)		Diff (ppm)	Height (Calc)	Height %	Height % (Calc)	Height Sum% (Calc)
		423.275	423.274		-2.07	8831.9	100	100	58.9
169	HW_Dougles.d	DBSearch	Ethyl 3-(N-butylacetamido)propionate	Insect repellent	C11 H21 N O3	9.376	216.159	215.152	86.53	86.53	1.4	Positive	2	27585	102288
Best	ID Source	Name	Formula		Score	RT Diff	Diff (ppm)	Score (Lib)	Score (DB)	Num Spectra	Precursor (Acq)
TRUE	DBSearch	Ethyl 3-(N-butylacetamido)propionate	C11 H21 N O3		86.53		1.4		86.53	0
	m/z	Species	Ion Formula		Score (MFG)	Score (MS)	Score (mass)	Score (iso. abund)	Score (iso. spacing)
	216.159	(M+H)+				86.53	99.12	97.23	48.53
		m/z	m/z (Calc)		Diff (ppm)	Height (Calc)	Height %	Height % (Calc)	Height Sum% (Calc)
		216.159	216.159		1.16	27669.9	100	100	88.8
170	HW_Dougles.d					9.389	525.882	1049.75				Positive	2	2341	12186
171	HW_Dougles.d	DBSearch	5''-Phosphoribostamycin		C17 H35 N4 O13 P	9.413	552.227	534.194	77.52	77.52	0.49	Positive	2	10506	47555
Best	ID Source	Name	Formula		Score	RT Diff	Diff (ppm)	Score (Lib)	Score (DB)	Num Spectra	Precursor (Acq)
TRUE	DBSearch	5''-Phosphoribostamycin	C17 H35 N4 O13 P		77.52		0.49		77.52	0
	m/z	Species	Ion Formula		Score (MFG)	Score (MS)	Score (mass)	Score (iso. abund)	Score (iso. spacing)
	552.228	(M+NH4)+				77.52	99.72	71.03	40.88
		m/z	m/z (Calc)		Diff (ppm)	Height (Calc)	Height %	Height % (Calc)	Height Sum% (Calc)
		552.227	552.228		1.09	10682.1	100	100	82.5
172	HW_Dougles.d	DBSearch	Isoeugenitol	traditional medicine as a remedy for colic, flatulence and indigestion	C11 H10 O4	9.421	207.065	206.058	85.37	85.37	-0.2	Positive	2	11915	45399
Best	ID Source	Name	Formula		Score	RT Diff	Diff (ppm)	Score (Lib)	Score (DB)	Num Spectra	Precursor (Acq)
TRUE	DBSearch	Isoeugenitol	C11 H10 O4		85.37		-0.2		85.37	6
	m/z	Species	Ion Formula		Score (MFG)	Score (MS)	Score (mass)	Score (iso. abund)	Score (iso. spacing)
	207.065	(M+H)+				85.37	99.98	96	43.39
		m/z	m/z (Calc)		Diff (ppm)	Height (Calc)	Height %	Height % (Calc)	Height Sum% (Calc)
		207.065	207.065		-0.72	11993.9	100	100	89.1
173	HW_Dougles.d					9.427	460.333	918.652				Positive	2	3308	15863
174	HW_Dougles.d					9.477	430.264	858.514				Positive	2	3252	13013
175	HW_Dougles.d					9.481	445.288	888.561				Positive	2	9201	38096
176	HW_Dougles.d					9.545	453.344	904.672				Positive	6	16720	108004
177	HW_Dougles.d					9.591	452.277	902.54				Positive	2	3422	14526
178	HW_Dougles.d					9.594	467.301	932.588				Positive	2	8788	37248
179	HW_Dougles.d					9.603	554.428	553.42				Positive	7	58664	388783
180	HW_Dougles.d					9.658	428.311	427.304				Positive	2	8556	32921
181	HW_Dougles.d					9.701	489.314	976.614				Positive	2	7025	33273
182	HW_Dougles.d	DBSearch	Artonin K	anti cnacer, lung cancer	C21 H18 O7	9.783	383.113	382.105	75.5	75.5	-0.4	Positive	2	6986	158754
Best	ID Source	Name	Formula		Score	RT Diff	Diff (ppm)	Score (Lib)	Score (DB)	Num Spectra	Precursor (Acq)
TRUE	DBSearch	Artonin K	C21 H18 O7		75.5		-0.4		75.5	0
	m/z	Species	Ion Formula		Score (MFG)	Score (MS)	Score (mass)	Score (iso. abund)	Score (iso. spacing)
	383.113	(M+H)+				75.5	99.87	56.46	49.59
		m/z	m/z (Calc)		Diff (ppm)	Height (Calc)	Height %	Height % (Calc)	Height Sum% (Calc)
		383.113	383.113		-0.22	7351.3	100	100	81.2
183	HW_Dougles.d					9.8	511.329	1020.64				Positive	2	5577	27308
184	HW_Dougles.d					9.827	329.244	328.237				Positive	3	43530	186922
185	HW_Dougles.d					9.834	667.511	666.504				Positive	8	23161	231079
186	HW_Dougles.d	DBSearch	Phytosphingosine		C18 H39 N O3	9.896	356.255	317.292	64.27	64.27	3.44	Positive	2	11025	40144
Best	ID Source	Name	Formula		Score	RT Diff	Diff (ppm)	Score (Lib)	Score (DB)	Num Spectra	Precursor (Acq)
TRUE	DBSearch	Phytosphingosine	C18 H39 N O3		64.27		3.44		64.27	3
	m/z	Species	Ion Formula		Score (MFG)	Score (MS)	Score (mass)	Score (iso. abund)	Score (iso. spacing)
	356.256	(M+K)+				64.27	91.98	33.1	46.25
		m/z	m/z (Calc)		Diff (ppm)	Height (Calc)	Height %	Height % (Calc)	Height Sum% (Calc)
		356.255	356.256		2.63	11133.8	100	100	83.1
187	HW_Dougles.d					9.897	533.34	1064.66				Positive	2	5745	24313
188	HW_Dougles.d					9.912	540.265	539.258				Positive	2	6078	24456
189	HW_Dougles.d					9.985	555.353	1108.69				Positive	2	4252	18249
190	HW_Dougles.d					10.012	390.802	779.588				Positive	7	19034	161066
191	HW_Dougles.d	DBSearch	Ganglioside GM3 (d18:1/16:0)		C57 H104 N2 O21	10.069	577.366	1152.72	48.28	48.28	-3.91	Positive	2	3184	16024
Best	ID Source	Name	Formula		Score	RT Diff	Diff (ppm)	Score (Lib)	Score (DB)	Num Spectra	Precursor (Acq)
TRUE	DBSearch	Ganglioside GM3 (d18:1/16:0)	C57 H104 N2 O21		48.28		-3.91		48.28	0
	m/z	Species	Ion Formula		Score (MFG)	Score (MS)	Score (mass)	Score (iso. abund)	Score (iso. spacing)
	577.364	(M+2H)+2				48.28	75.28	2.67	49.01
		m/z	m/z (Calc)		Diff (ppm)	Height (Calc)	Height %	Height % (Calc)	Height Sum% (Calc)
		577.366	577.364		-4.29	3145.4	100	100	60.8
192	HW_Dougles.d					10.074	580.333	579.326				Positive	2	11003	59635
193	HW_Dougles.d	DBSearch	(25S)-3-oxo-12beta-acetoxy-cholest-1,4-dien-26-oic acid		C30 H44 O5	10.094	485.326	484.319	76.46	76.46	0.14	Positive	2	6519	29579
Best	ID Source	Name	Formula		Score	RT Diff	Diff (ppm)	Score (Lib)	Score (DB)	Num Spectra	Precursor (Acq)
TRUE	DBSearch	(25S)-3-oxo-12beta-acetoxy-cholest-1,4-dien-26-oic acid	C30 H44 O5		76.46		0.14		76.46	0
	m/z	Species	Ion Formula		Score (MFG)	Score (MS)	Score (mass)	Score (iso. abund)	Score (iso. spacing)
	485.326	(M+H)+				76.46	99.98	67.96	39.62
		m/z	m/z (Calc)		Diff (ppm)	Height (Calc)	Height %	Height % (Calc)	Height Sum% (Calc)
		485.326	485.326		0.98	6329.1	100	100	75.1
194	HW_Dougles.d					10.099	786.314	1570.61				Positive	3	4052	26920
195	HW_Dougles.d					10.111	442.329	441.321				Positive	3	29476	123839
196	HW_Dougles.d					10.158	447.344	892.673				Positive	4	11348	72402
197	HW_Dougles.d					10.179	469.339	468.332				Positive	2	9052	33820
198	HW_Dougles.d					10.24	580.331	579.323				Positive	2	5179	25984
199	HW_Dougles.d					10.269	720.291	1438.57				Positive	2	2409	12545
200	HW_Dougles.d					10.274	503.885	1005.75				Positive	2	2761	12226
201	HW_Dougles.d	DBSearch	(25R)-5alpha-spirostan-3beta,6alpha,23S-triol 6-O-beta-D-glucopyranoside		C34 H58 O10	10.275	649.391	626.403	68.32	68.32	-0.15	Positive	2	3716	16011
Best	ID Source	Name	Formula		Score	RT Diff	Diff (ppm)	Score (Lib)	Score (DB)	Num Spectra	Precursor (Acq)
TRUE	DBSearch	(25R)-5alpha-spirostan-3beta,6alpha,23S-triol 6-O-beta-D-glucopyranoside	C34 H58 O10		68.32		-0.15		68.32	0
	m/z	Species	Ion Formula		Score (MFG)	Score (MS)	Score (mass)	Score (iso. abund)	Score (iso. spacing)
	649.392	(M+Na)+				68.32	99.97	50.5	26.42
		m/z	m/z (Calc)		Diff (ppm)	Height (Calc)	Height %	Height % (Calc)	Height Sum% (Calc)
		649.391	649.392		1.27	3580.5	100	100	72.6
202	HW_Dougles.d	DBSearch	Pristimerol		C30 H42 O4	10.275	467.315	466.308	74.15	74.15	1.04	Positive	2	4919	24466
Best	ID Source	Name	Formula		Score	RT Diff	Diff (ppm)	Score (Lib)	Score (DB)	Num Spectra	Precursor (Acq)
TRUE	DBSearch	Pristimerol	C30 H42 O4		74.15		1.04		74.15	0
	m/z	Species	Ion Formula		Score (MFG)	Score (MS)	Score (mass)	Score (iso. abund)	Score (iso. spacing)
	467.316	(M+H)+				74.15	98.91	53.16	49.81
		m/z	m/z (Calc)		Diff (ppm)	Height (Calc)	Height %	Height % (Calc)	Height Sum% (Calc)
		467.315	467.316		1.16	5107.4	100	100	75.1
203	HW_Dougles.d	DBSearch	Liquoric acid	anti microbial, antioxidant, cytotoxic	C30 H44 O5	10.278	485.326	484.319	73.72	73.72	0.13	Positive	2	7597	43523
Best	ID Source	Name	Formula		Score	RT Diff	Diff (ppm)	Score (Lib)	Score (DB)	Num Spectra	Precursor (Acq)
TRUE	DBSearch	Liquoric acid	C30 H44 O5		73.72		0.13		73.72	0
	m/z	Species	Ion Formula		Score (MFG)	Score (MS)	Score (mass)	Score (iso. abund)	Score (iso. spacing)
	485.326	(M+H)+				73.72	99.98	49.71	49.99
		m/z	m/z (Calc)		Diff (ppm)	Height (Calc)	Height %	Height % (Calc)	Height Sum% (Calc)
		485.326	485.326		0.11	7913.1	100	100	75.1
204	HW_Dougles.d					10.306	577.391	277.202				Positive	2	1683	12451
205	HW_Dougles.d	DBSearch	LysoPE(0:0/22:0)		C27 H56 N O7 P	10.307	555.411	537.377	67.28	67.28	4.32	Positive	2	13130	52869
Best	ID Source	Name	Formula		Score	RT Diff	Diff (ppm)	Score (Lib)	Score (DB)	Num Spectra	Precursor (Acq)
TRUE	DBSearch	LysoPE(0:0/22:0)	C27 H56 N O7 P		67.28		4.32		67.28	0
	m/z	Species	Ion Formula		Score (MFG)	Score (MS)	Score (mass)	Score (iso. abund)	Score (iso. spacing)
	555.413	(M+NH4)+				67.28	80.7	66.12	41.82
		m/z	m/z (Calc)		Diff (ppm)	Height (Calc)	Height %	Height % (Calc)	Height Sum% (Calc)
		555.411	555.413		3.43	13251	100	100	76.4
206	HW_Dougles.d	DBSearch	DL-threo-PDMP		C23 H38 N2 O3	10.575	391.294	390.287	40.66	40.66	4.26	Positive	2	2478	15445
Best	ID Source	Name	Formula		Score	RT Diff	Diff (ppm)	Score (Lib)	Score (DB)	Num Spectra	Precursor (Acq)
TRUE	DBSearch	DL-threo-PDMP	C23 H38 N2 O3		40.66		4.26		40.66	0
	m/z	Species	Ion Formula		Score (MFG)	Score (MS)	Score (mass)	Score (iso. abund)	Score (iso. spacing)
	391.296	(M+H)+				40.66	85.39	0	0
		m/z	m/z (Calc)		Diff (ppm)	Height (Calc)	Height %	Height % (Calc)	Height Sum% (Calc)
		391.294	391.296		4.25	2477.6	100	100	100
207	HW_Dougles.d	DBSearch	Deoxyloganin		C17 H26 O9	11.048	392.193	374.159	40.46	40.46	-4.42	Positive	2	4850	21149
Best	ID Source	Name	Formula		Score	RT Diff	Diff (ppm)	Score (Lib)	Score (DB)	Num Spectra	Precursor (Acq)
TRUE	DBSearch	Deoxyloganin	C17 H26 O9		40.46		-4.42		40.46	0
	m/z	Species	Ion Formula		Score (MFG)	Score (MS)	Score (mass)	Score (iso. abund)	Score (iso. spacing)
	392.192	(M+NH4)+				40.46	84.97	0	0
		m/z	m/z (Calc)		Diff (ppm)	Height (Calc)	Height %	Height % (Calc)	Height Sum% (Calc)
		392.193	392.192		-4.21	4849.8	100	100	100
208	HW_Dougles.d	DBSearch	Granisetron metabolite 4	nausea management	C17 H22 N4 O2	11.057	332.208	314.174	47.17	47.17	1.16	Positive	2	4714	22932
Best	ID Source	Name	Formula		Score	RT Diff	Diff (ppm)	Score (Lib)	Score (DB)	Num Spectra	Precursor (Acq)
TRUE	DBSearch	Granisetron metabolite 4	C17 H22 N4 O2		47.17		1.16		47.17	0
	m/z	Species	Ion Formula		Score (MFG)	Score (MS)	Score (mass)	Score (iso. abund)	Score (iso. spacing)
	332.208	(M+NH4)+				47.17	99.07	0	0
		m/z	m/z (Calc)		Diff (ppm)	Height (Calc)	Height %	Height % (Calc)	Height Sum% (Calc)
		332.208	332.208		1.1	4713.5	100	100	100
209	HW_Dougles.d	DBSearch	Jasmolone glucoside	Insecticide	C17 H26 O7	11.24	343.176	342.169	80.86	80.86	-2.87	Positive	2	20509	78070
Best	ID Source	Name	Formula		Score	RT Diff	Diff (ppm)	Score (Lib)	Score (DB)	Num Spectra	Precursor (Acq)
TRUE	DBSearch	Jasmolone glucoside	C17 H26 O7		80.86		-2.87		80.86	0
	m/z	Species	Ion Formula		Score (MFG)	Score (MS)	Score (mass)	Score (iso. abund)	Score (iso. spacing)
	343.175	(M+H)+				80.86	93.91	85.64	49.03
		m/z	m/z (Calc)		Diff (ppm)	Height (Calc)	Height %	Height % (Calc)	Height Sum% (Calc)
		343.176	343.175		-3.07	20750.2	100	100	84.1
210	HW_Dougles.d	DBSearch	Trp Val Gly		C18 H24 N4 O4	11.242	378.214	360.18	46.79	46.79	-1.48	Positive	2	6016	26183
Best	ID Source	Name	Formula		Score	RT Diff	Diff (ppm)	Score (Lib)	Score (DB)	Num Spectra	Precursor (Acq)
TRUE	DBSearch	Trp Val Gly	C18 H24 N4 O4		46.79		-1.48		46.79	3
	m/z	Species	Ion Formula		Score (MFG)	Score (MS)	Score (mass)	Score (iso. abund)	Score (iso. spacing)
	378.214	(M+NH4)+				46.79	98.26	0	0
		m/z	m/z (Calc)		Diff (ppm)	Height (Calc)	Height %	Height % (Calc)	Height Sum% (Calc)
		378.214	378.214		-1.41	6016	100	100	100
211	HW_Dougles.d	DBSearch	Val Trp Val		C21 H30 N4 O4	11.421	420.26	402.226	81.12	81.12	0.6	Positive	2	7533	28911
Best	ID Source	Name	Formula		Score	RT Diff	Diff (ppm)	Score (Lib)	Score (DB)	Num Spectra	Precursor (Acq)
TRUE	DBSearch	Val Trp Val	C21 H30 N4 O4		81.12		0.6		81.12	3
	m/z	Species	Ion Formula		Score (MFG)	Score (MS)	Score (mass)	Score (iso. abund)	Score (iso. spacing)
	420.26	(M+NH4)+				81.12	99.68	84.21	40.29
		m/z	m/z (Calc)		Diff (ppm)	Height (Calc)	Height %	Height % (Calc)	Height Sum% (Calc)
		420.26	420.26		1.28	7392.1	100	100	79.9
212	HW_Dougles.d					11.557	464.286	463.279				Positive	2	6960	27841
213	HW_Dougles.d					11.676	508.312	507.305				Positive	2	6497	24878
214	HW_Dougles.d	DBSearch	Edulone A		C22 H22 O8	11.702	415.139	414.131	62.43	62.43	0.08	Positive	2	5566	150100
Best	ID Source	Name	Formula		Score	RT Diff	Diff (ppm)	Score (Lib)	Score (DB)	Num Spectra	Precursor (Acq)
TRUE	DBSearch	Edulone A	C22 H22 O8		62.43		0.08		62.43	0
	m/z	Species	Ion Formula		Score (MFG)	Score (MS)	Score (mass)	Score (iso. abund)	Score (iso. spacing)
	415.139	(M+H)+				62.43	99.99	14.53	44.78
		m/z	m/z (Calc)		Diff (ppm)	Height (Calc)	Height %	Height % (Calc)	Height Sum% (Calc)
		415.139	415.139		-0.7	6270.4	100	100	80.4
215	HW_Dougles.d					11.779	552.338	551.33				Positive	2	5911	23075
216	HW_Dougles.d	DBSearch	1-NBD-decanoyl-2-decanoyl-sn-Glycerol		C29 H46 N4 O8	11.875	596.364	578.33	71.83	71.83	2.41	Positive	2	5822	23265
Best	ID Source	Name	Formula		Score	RT Diff	Diff (ppm)	Score (Lib)	Score (DB)	Num Spectra	Precursor (Acq)
TRUE	DBSearch	1-NBD-decanoyl-2-decanoyl-sn-Glycerol	C29 H46 N4 O8		71.83		2.41		71.83	6
	m/z	Species	Ion Formula		Score (MFG)	Score (MS)	Score (mass)	Score (iso. abund)	Score (iso. spacing)
	596.365	(M+NH4)+				71.83	93.15	55.18	49.17
		m/z	m/z (Calc)		Diff (ppm)	Height (Calc)	Height %	Height % (Calc)	Height Sum% (Calc)
		596.364	596.365		2.58	5906.3	100	100	74.6
217	HW_Dougles.d	DBSearch	NAc-FnorLRF-amide		C32 H46 N8 O5	11.957	640.39	622.356	65.19	65.19	4.21	Positive	2	5559	19989
Best	ID Source	Name	Formula		Score	RT Diff	Diff (ppm)	Score (Lib)	Score (DB)	Num Spectra	Precursor (Acq)
TRUE	DBSearch	NAc-FnorLRF-amide	C32 H46 N8 O5		65.19		4.21		65.19	0
	m/z	Species	Ion Formula		Score (MFG)	Score (MS)	Score (mass)	Score (iso. abund)	Score (iso. spacing)
	640.393	(M+NH4)+				65.19	79.61	56.48	46.8
		m/z	m/z (Calc)		Diff (ppm)	Height (Calc)	Height %	Height % (Calc)	Height Sum% (Calc)
		640.39	640.393		4.55	5406.8	100	100	72.1
218	HW_Dougles.d					12.031	684.416	683.409				Positive	2	4501	17727
219	HW_Dougles.d					12.1	728.442	727.435				Positive	2	4026	14132
220	HW_Dougles.d					12.166	772.467	385.73				Positive	2	2052	14355
221	HW_Dougles.d	DBSearch	PI(14:0/20:3(8Z,11Z,14Z))		C43 H77 O13 P	12.223	417.262	832.511	62.25	62.25	-1.13	Positive	2	3267	14649
Best	ID Source	Name	Formula		Score	RT Diff	Diff (ppm)	Score (Lib)	Score (DB)	Num Spectra	Precursor (Acq)
TRUE	DBSearch	PI(14:0/20:3(8Z,11Z,14Z))	C43 H77 O13 P		62.25		-1.13		62.25	0
	m/z	Species	Ion Formula		Score (MFG)	Score (MS)	Score (mass)	Score (iso. abund)	Score (iso. spacing)
	417.262	(M+2H)+2				62.25	98.02	24.14	36.44
		m/z	m/z (Calc)		Diff (ppm)	Height (Calc)	Height %	Height % (Calc)	Height Sum% (Calc)
		417.262	417.262		0.34	3220.4	100	100	67.6
222	HW_Dougles.d					12.276	439.277	876.54				Positive	2	3689	16345
223	HW_Dougles.d					12.332	461.29	920.566				Positive	2	3776	17315
224	HW_Dougles.d					12.377	483.305	964.595				Positive	2	3896	16655
225	HW_Dougles.d					12.421	505.316	1008.62				Positive	2	3731	17627
226	HW_Dougles.d					12.462	527.33	1052.64				Positive	2	3247	13655
227	HW_Dougles.d					12.502	549.343	1096.67				Positive	2	2914	13170
228	HW_Dougles.d					12.539	571.356	1140.7				Positive	2	2620	10948
229	HW_Dougles.d					12.578	593.371	1184.73				Positive	2	1989	9799
230	HW_Dougles.d	DBSearch	C16 Sphinganine		C16 H35 N O2	12.794	274.274	273.267	85.05	85.05	-1.74	Positive	2	13502	49369
Best	ID Source	Name	Formula		Score	RT Diff	Diff (ppm)	Score (Lib)	Score (DB)	Num Spectra	Precursor (Acq)
TRUE	DBSearch	C16 Sphinganine	C16 H35 N O2		85.05		-1.74		85.05	0
	m/z	Species	Ion Formula		Score (MFG)	Score (MS)	Score (mass)	Score (iso. abund)	Score (iso. spacing)
	274.274	(M+H)+				85.05	98.2	93.65	48.44
		m/z	m/z (Calc)		Diff (ppm)	Height (Calc)	Height %	Height % (Calc)	Height Sum% (Calc)
		274.274	274.274		-1.45	13618.9	100	100	84.6
231	HW_Dougles.d	DBSearch	Phytosphingosine	Anti-aging, hydration	C18 H39 N O3	12.898	318.301	317.293	78.82	78.82	-1.09	Positive	2	9258	34277
Best	ID Source	Name	Formula		Score	RT Diff	Diff (ppm)	Score (Lib)	Score (DB)	Num Spectra	Precursor (Acq)
TRUE	DBSearch	Phytosphingosine	C18 H39 N O3		78.82		-1.09		78.82	3
	m/z	Species	Ion Formula		Score (MFG)	Score (MS)	Score (mass)	Score (iso. abund)	Score (iso. spacing)
	318.3	(M+H)+				78.82	99.16	69.21	49.67
		m/z	m/z (Calc)		Diff (ppm)	Height (Calc)	Height %	Height % (Calc)	Height Sum% (Calc)
		318.301	318.3		-0.93	9681.6	100	100	83.1
232	HW_Dougles.d					13.1	228.196	227.189				Positive	2	6631	80594
233	HW_Dougles.d	DBSearch	2,6-Nonadien-1-ol	flovouring (vege taste)	C9 H16 O	13.336	158.154	140.12	87.1	87.1	2.51	Positive	2	18146	112691
Best	ID Source	Name	Formula		Score	RT Diff	Diff (ppm)	Score (Lib)	Score (DB)	Num Spectra	Precursor (Acq)
TRUE	DBSearch	2,6-Nonadien-1-ol	C9 H16 O		87.1		2.51		87.1	0
	m/z	Species	Ion Formula		Score (MFG)	Score (MS)	Score (mass)	Score (iso. abund)	Score (iso. spacing)
	158.154	(M+NH4)+				87.1	98.41	99.31	49.82
		m/z	m/z (Calc)		Diff (ppm)	Height (Calc)	Height %	Height % (Calc)	Height Sum% (Calc)
		158.154	158.154		2.15	18125.7	100	100	90.6
234	HW_Dougles.d	DBSearch	(-)-trans-C75		C14 H22 O4	13.652	255.159	254.152	86.26	86.26	-0.5	Positive	3	11635	60850
Best	ID Source	Name	Formula		Score	RT Diff	Diff (ppm)	Score (Lib)	Score (DB)	Num Spectra	Precursor (Acq)
TRUE	DBSearch	(-)-trans-C75	C14 H22 O4		86.26		-0.5		86.26	4
	m/z	Species	Ion Formula		Score (MFG)	Score (MS)	Score (mass)	Score (iso. abund)	Score (iso. spacing)
	255.159	(M+H)+				86.26	99.86	94.09	49.68
		m/z	m/z (Calc)		Diff (ppm)	Height (Calc)	Height %	Height % (Calc)	Height Sum% (Calc)
		255.159	255.159		-0.61	11712	100	100	86.5
235	HW_Dougles.d	DBSearch	(S)-p-Mentha-1,8-dien-10-yl acetate		C12 H18 O2	15.016	195.138	194.131	81	81	-0.5	Positive	2	14540	62253
Best	ID Source	Name	Formula		Score	RT Diff	Diff (ppm)	Score (Lib)	Score (DB)	Num Spectra	Precursor (Acq)
TRUE	DBSearch	(S)-p-Mentha-1,8-dien-10-yl acetate	C12 H18 O2		81		-0.5		81	0
	m/z	Species	Ion Formula		Score (MFG)	Score (MS)	Score (mass)	Score (iso. abund)	Score (iso. spacing)
	195.138	(M+H)+				81	99.9	78.59	46.09
		m/z	m/z (Calc)		Diff (ppm)	Height (Calc)	Height %	Height % (Calc)	Height Sum% (Calc)
		195.138	195.138		0.04	15120.1	100	100	88.3
236	HW_Dougles.d					15.084	393.287	375.253				Positive	4	15519	108560
237	HW_Dougles.d	DBSearch	N-Methyldioctylamine		C17 H37 N	15.089	256.3	255.293	84.46	84.46	-0.84	Positive	2	13612	87802
Best	ID Source	Name	Formula		Score	RT Diff	Diff (ppm)	Score (Lib)	Score (DB)	Num Spectra	Precursor (Acq)
TRUE	DBSearch	N-Methyldioctylamine	C17 H37 N		84.46		-0.84		84.46	0
	m/z	Species	Ion Formula		Score (MFG)	Score (MS)	Score (mass)	Score (iso. abund)	Score (iso. spacing)
	256.3	(M+H)+				84.46	99.61	88.32	49.54
		m/z	m/z (Calc)		Diff (ppm)	Height (Calc)	Height %	Height % (Calc)	Height Sum% (Calc)
		256.3	256.3		-0.65	13939.3	100	100	83.9
238	HW_Dougles.d	DBSearch	His Met Lys		C17 H30 N6 O4 S	15.419	415.212	414.205	47.36	47.36	-0.77	Positive	3	5705	26514
Best	ID Source	Name	Formula		Score	RT Diff	Diff (ppm)	Score (Lib)	Score (DB)	Num Spectra	Precursor (Acq)
TRUE	DBSearch	His Met Lys	C17 H30 N6 O4 S		47.36		-0.77		47.36	0
	m/z	Species	Ion Formula		Score (MFG)	Score (MS)	Score (mass)	Score (iso. abund)	Score (iso. spacing)
	415.212	(M+H)+				47.36	99.45	0	0
		m/z	m/z (Calc)		Diff (ppm)	Height (Calc)	Height %	Height % (Calc)	Height Sum% (Calc)
		415.212	415.212		-0.77	5704.8	100	100	100
239	HW_Dougles.d					16.854	221.133	220.126				Positive	2	7679	33931
240	HW_Dougles.d					17.228	603.341	602.334				Positive	2	2727	17519
241	HW_Dougles.d	DBSearch	Polysorbate 60		C22 H42 O8	18.122	452.322	434.288	81.38	81.38	-0.08	Positive	2	10357	67906
Best	ID Source	Name	Formula		Score	RT Diff	Diff (ppm)	Score (Lib)	Score (DB)	Num Spectra	Precursor (Acq)
TRUE	DBSearch	Polysorbate 60	C22 H42 O8		81.38		-0.08		81.38	0
	m/z	Species	Ion Formula		Score (MFG)	Score (MS)	Score (mass)	Score (iso. abund)	Score (iso. spacing)
	452.322	(M+NH4)+				81.38	99.99	79.15	46.84
		m/z	m/z (Calc)		Diff (ppm)	Height (Calc)	Height %	Height % (Calc)	Height Sum% (Calc)
		452.322	452.322		-0.47	10315.5	100	100	80
242	HW_Dougles.d	DBSearch	Emmotin A		C16 H22 O4	18.883	279.16	278.153	45.03	45.03	-3.02	Positive	2	6346	28766
Best	ID Source	Name	Formula		Score	RT Diff	Diff (ppm)	Score (Lib)	Score (DB)	Num Spectra	Precursor (Acq)
TRUE	DBSearch	Emmotin A	C16 H22 O4		45.03		-3.02		45.03	0
	m/z	Species	Ion Formula		Score (MFG)	Score (MS)	Score (mass)	Score (iso. abund)	Score (iso. spacing)
	279.159	(M+H)+				45.03	94.57	0	0
		m/z	m/z (Calc)		Diff (ppm)	Height (Calc)	Height %	Height % (Calc)	Height Sum% (Calc)
		279.16	279.159		-3.01	6346.4	100	100	100
243	HW_Dougles.d					18.971	149.023	148.016				Positive	2	48644	300550
244	HW_Dougles.d	DBSearch	Emmotin A	Terpenes	C16 H22 O4	18.974	279.159	278.152	81.05	81.05	-1.26	Positive	5	14079	142599
Best	ID Source	Name	Formula		Score	RT Diff	Diff (ppm)	Score (Lib)	Score (DB)	Num Spectra	Precursor (Acq)
TRUE	DBSearch	Emmotin A	C16 H22 O4		81.05		-1.26		81.05	0
	m/z	Species	Ion Formula		Score (MFG)	Score (MS)	Score (mass)	Score (iso. abund)	Score (iso. spacing)
	279.159	(M+H)+				81.05	99.04	78.64	47.95
		m/z	m/z (Calc)		Diff (ppm)	Height (Calc)	Height %	Height % (Calc)	Height Sum% (Calc)
		279.159	279.159		-0.89	14562	100	100	84.9
245	HW_Dougles.d					19.338	590.426	589.419				Positive	2	7532	61954
246	HW_Dougles.d					19.36	483.317	482.31				Positive	7	46121	438778
247	HW_Dougles.d					19.399	546.4	545.393				Positive	2	16029	110249
248	HW_Dougles.d	DBSearch	(25S)-5alpha-cholestan-3beta,6alpha,7beta,8beta,15alpha,16beta,26-heptol		C27 H48 O7	19.463	502.374	484.34	98.61	98.61	-0.41	Positive	3	20592	165189
Best	ID Source	Name	Formula		Score	RT Diff	Diff (ppm)	Score (Lib)	Score (DB)	Num Spectra	Precursor (Acq)
TRUE	DBSearch	(25S)-5alpha-cholestan-3beta,6alpha,7beta,8beta,15alpha,16beta,26-heptol	C27 H48 O7		98.61		-0.41		98.61	0
	m/z	Species	Ion Formula		Score (MFG)	Score (MS)	Score (mass)	Score (iso. abund)	Score (iso. spacing)
	502.374	(M+NH4)+				98.61	99.83	99.19	95.46
		m/z	m/z (Calc)		Diff (ppm)	Height (Calc)	Height %	Height % (Calc)	Height Sum% (Calc)
		502.374	502.374		0.16	20612.7	100	100	73.3
249	HW_Dougles.d					19.5	458.349	457.341				Positive	2	15292	124232
250	HW_Dougles.d	DBSearch	24-Nor-5β-cholane-3α,7α,12α,22,23-pentol		C23 H40 O5	19.521	397.295	396.288	47.56	47.56	-0.38	Positive	2	2853	18880
Best	ID Source	Name	Formula		Score	RT Diff	Diff (ppm)	Score (Lib)	Score (DB)	Num Spectra	Precursor (Acq)
TRUE	DBSearch	24-Nor-5β-cholane-3α,7α,12α,22,23-pentol	C23 H40 O5		47.56		-0.38		47.56	0
	m/z	Species	Ion Formula		Score (MFG)	Score (MS)	Score (mass)	Score (iso. abund)	Score (iso. spacing)
	397.295	(M+H)+				47.56	99.87	0	0
		m/z	m/z (Calc)		Diff (ppm)	Height (Calc)	Height %	Height % (Calc)	Height Sum% (Calc)
		397.295	397.295		-0.38	2852.7	100	100	100
251	HW_Dougles.d	DBSearch	N-stearoyl glutamic acid		C23 H43 N O5	19.522	414.321	413.314	76.54	76.54	0.41	Positive	2	9104	70157
Best	ID Source	Name	Formula		Score	RT Diff	Diff (ppm)	Score (Lib)	Score (DB)	Num Spectra	Precursor (Acq)
TRUE	DBSearch	N-stearoyl glutamic acid	C23 H43 N O5		76.54		0.41		76.54	0
	m/z	Species	Ion Formula		Score (MFG)	Score (MS)	Score (mass)	Score (iso. abund)	Score (iso. spacing)
	414.321	(M+H)+				76.54	99.85	63.66	45.37
		m/z	m/z (Calc)		Diff (ppm)	Height (Calc)	Height %	Height % (Calc)	Height Sum% (Calc)
		414.321	414.321		1.01	9469.2	100	100	79.4
252	HW_Dougles.d					19.685	439.291	438.283				Positive	2	4540	23687
253	HW_Dougles.d	DBSearch	Val Trp Val		C21 H30 N4 O4	20.283	403.234	402.226	47.43	47.43	0.66	Positive	2	2511	12853
Best	ID Source	Name	Formula		Score	RT Diff	Diff (ppm)	Score (Lib)	Score (DB)	Num Spectra	Precursor (Acq)
TRUE	DBSearch	Val Trp Val	C21 H30 N4 O4		47.43		0.66		47.43	3
	m/z	Species	Ion Formula		Score (MFG)	Score (MS)	Score (mass)	Score (iso. abund)	Score (iso. spacing)
	403.234	(M+H)+				47.43	99.61	0	0
		m/z	m/z (Calc)		Diff (ppm)	Height (Calc)	Height %	Height % (Calc)	Height Sum% (Calc)
		403.234	403.234		0.66	2511.4	100	100	100
254	HW_Dougles.d	DBSearch	28:2(5Z,9Z)(6Br)		C28 H51 Br O2	20.609	499.313	498.306	51.93	51.93	3.16	Positive	3	7466	47571
Best	ID Source	Name	Formula		Score	RT Diff	Diff (ppm)	Score (Lib)	Score (DB)	Num Spectra	Precursor (Acq)
TRUE	DBSearch	28:2(5Z,9Z)(6Br)	C28 H51 Br O2		51.93		3.16		51.93	0
	m/z	Species	Ion Formula		Score (MFG)	Score (MS)	Score (mass)	Score (iso. abund)	Score (iso. spacing)
	501.313	(M+H)+				51.93	89.76	0	38.58
		m/z	m/z (Calc)		Diff (ppm)	Height (Calc)	Height %	Height % (Calc)	Height Sum% (Calc)
		499.313	499.315		2.29	7331.8	100	100	76.4
255	HW_Dougles.d					21.024	319.267	318.26				Positive	2	5143	27743
256	HW_Dougles.d					21.029	256.265	255.258				Positive	2	7442	35767
257	HW_Dougles.d	DBSearch	Dihydrostreptomycin 6-phosphate	Anti microbal	C21 H42 N7 O15 P	21.652	702.214	663.248	60.5	60.5	-0.61	Positive	3	2633	33394
Best	ID Source	Name	Formula		Score	RT Diff	Diff (ppm)	Score (Lib)	Score (DB)	Num Spectra	Precursor (Acq)
TRUE	DBSearch	Dihydrostreptomycin 6-phosphate	C21 H42 N7 O15 P		60.5		-0.61		60.5	0
	m/z	Species	Ion Formula		Score (MFG)	Score (MS)	Score (mass)	Score (iso. abund)	Score (iso. spacing)
	702.211	(M+K)+				60.5	99.5	0.03	55.07
		m/z	m/z (Calc)		Diff (ppm)	Height (Calc)	Height %	Height % (Calc)	Height Sum% (Calc)
		702.214	702.211		-4.31	4385.7	100	100	71.4
258	HW_Dougles.d					21.875	777.232	776.225				Positive	3	3028	112695
259	HW_Dougles.d	DBSearch	1α,25-dihydroxy-3-deoxy-19-nor-22-oxavitamin D3 / 1α,25-dihydroxy-3-deoxy-19-nor-22-oxacholecalciferol	Vitamin D3 deriaratives	C25 H42 O3	22.187	408.348	390.314	81.63	81.63	-1.25	Positive	2	6255	40279
Best	ID Source	Name	Formula		Score	RT Diff	Diff (ppm)	Score (Lib)	Score (DB)	Num Spectra	Precursor (Acq)
TRUE	DBSearch	1α,25-dihydroxy-3-deoxy-19-nor-22-oxavitamin D3 / 1α,25-dihydroxy-3-deoxy-19-nor-22-oxacholecalciferol	C25 H42 O3		81.63		-1.25		81.63	0
	m/z	Species	Ion Formula		Score (MFG)	Score (MS)	Score (mass)	Score (iso. abund)	Score (iso. spacing)
	408.347	(M+NH4)+				81.63	98.65	80.37	49.12
		m/z	m/z (Calc)		Diff (ppm)	Height (Calc)	Height %	Height % (Calc)	Height Sum% (Calc)
		408.348	408.347		-1.41	6105.6	100	100	78.1
260	HW_Dougles.d					22.19	476.352	475.344				Positive	2	7239	44503
261	HW_Dougles.d					22.191	747.561	724.572				Positive	4	4042	29019
262	HW_Dougles.d					22.193	363.293	362.286				Positive	6	186859	1315495
263	HW_Dougles.d					22.194	464.376	463.369				Positive	2	7946	43621
264	HW_Dougles.d	DBSearch	Dihydrotachysterol	treatment for lack of calcium in blood	C28 H46 O	22.194	421.345	398.358	33.08	33.08	-7.51	Positive	2	4026	28407
Best	ID Source	Name	Formula		Score	RT Diff	Diff (ppm)	Score (Lib)	Score (DB)	Num Spectra	Precursor (Acq)
TRUE	DBSearch	Dihydrotachysterol	C28 H46 O		33.08		-7.51		33.08	1
	m/z	Species	Ion Formula		Score (MFG)	Score (MS)	Score (mass)	Score (iso. abund)	Score (iso. spacing)
	421.344	(M+Na)+				33.08	60.63	6.18	10.24
		m/z	m/z (Calc)		Diff (ppm)	Height (Calc)	Height %	Height % (Calc)	Height Sum% (Calc)
		421.345	421.344		-1.45	4708.1	100	100	76.4
265	HW_Dougles.d					22.323	531.408	530.401				Positive	3	3028	92719
266	HW_Dougles.d					22.473	779.232	778.225				Positive	3	4222	116379
267	HW_Dougles.d					22.475	804.264	803.256				Positive	3	2440	91182
268	HW_Dougles.d	DBSearch	Camptothecin	Anti cancer	C20 H16 N2 O4	22.588	371.101	348.111	58.54	58.54	-0.96	Positive	2	5924	29199
Best	ID Source	Name	Formula		Score	RT Diff	Diff (ppm)	Score (Lib)	Score (DB)	Num Spectra	Precursor (Acq)
TRUE	DBSearch	Camptothecin	C20 H16 N2 O4		58.54		-0.96		58.54	6
	m/z	Species	Ion Formula		Score (MFG)	Score (MS)	Score (mass)	Score (iso. abund)	Score (iso. spacing)
	371.1	(M+Na)+				58.54	99.28	23.8	18.75
		m/z	m/z (Calc)		Diff (ppm)	Height (Calc)	Height %	Height % (Calc)	Height Sum% (Calc)
		371.101	371.1		-3.42	6574.2	100	100	81.5
269	HW_Dougles.d					22.59	554.177	553.17				Positive	3	4137	28368
270	HW_Dougles.d	DBSearch	Hexacosanedioic acid	Breast cancer, colon cancer	C26 H50 O4	22.616	427.378	426.371	68.01	68.01	-0.92	Positive	2	5983	153501
Best	ID Source	Name	Formula		Score	RT Diff	Diff (ppm)	Score (Lib)	Score (DB)	Num Spectra	Precursor (Acq)
TRUE	DBSearch	Hexacosanedioic acid	C26 H50 O4		68.01		-0.92		68.01	0
	m/z	Species	Ion Formula		Score (MFG)	Score (MS)	Score (mass)	Score (iso. abund)	Score (iso. spacing)
	427.378	(M+H)+				68.01	99.21	31.19	49.8
		m/z	m/z (Calc)		Diff (ppm)	Height (Calc)	Height %	Height % (Calc)	Height Sum% (Calc)
		427.378	427.378		-0.77	6513.7	100	100	77.6
271	HW_Dougles.d	DBSearch	Hexacosanedioic acid	Breast cancer, colon cancer	C26 H50 O4	22.742	449.36	426.371	80.43	80.43	0.75	Positive	2	5864	46376
Best	ID Source	Name	Formula		Score	RT Diff	Diff (ppm)	Score (Lib)	Score (DB)	Num Spectra	Precursor (Acq)
TRUE	DBSearch	Hexacosanedioic acid	C26 H50 O4		80.43		0.75		80.43	0
	m/z	Species	Ion Formula		Score (MFG)	Score (MS)	Score (mass)	Score (iso. abund)	Score (iso. spacing)
	449.36	(M+Na)+				80.43	99.46	74.86	49.05
		m/z	m/z (Calc)		Diff (ppm)	Height (Calc)	Height %	Height % (Calc)	Height Sum% (Calc)
		449.36	449.36		0.46	5930.2	100	100	77.6
272	HW_Dougles.d	DBSearch	Ganoderic acid DM	Prostate cancer treatment	C30 H44 O4	22.747	469.331	468.324	72.58	72.58	-0.14	Positive	2	3753	21674
Best	ID Source	Name	Formula		Score	RT Diff	Diff (ppm)	Score (Lib)	Score (DB)	Num Spectra	Precursor (Acq)
TRUE	DBSearch	Ganoderic acid DM	C30 H44 O4		72.58		-0.14		72.58	0
	m/z	Species	Ion Formula		Score (MFG)	Score (MS)	Score (mass)	Score (iso. abund)	Score (iso. spacing)
	469.331	(M+H)+				72.58	99.98	45.96	49.72
		m/z	m/z (Calc)		Diff (ppm)	Height (Calc)	Height %	Height % (Calc)	Height Sum% (Calc)
		469.331	469.331		0.02	3946.3	100	100	75.1
273	HW_Dougles.d	DBSearch	N-stearoyl valine	anti microbial/fats	C23 H45 N O3	22.75	406.328	383.339	45.72	45.72	2.18	Positive	3	4098	31968
Best	ID Source	Name	Formula		Score	RT Diff	Diff (ppm)	Score (Lib)	Score (DB)	Num Spectra	Precursor (Acq)
TRUE	DBSearch	N-stearoyl valine	C23 H45 N O3		45.72		2.18		45.72	0
	m/z	Species	Ion Formula		Score (MFG)	Score (MS)	Score (mass)	Score (iso. abund)	Score (iso. spacing)
	406.329	(M+Na)+				45.72	96.01	0	0
		m/z	m/z (Calc)		Diff (ppm)	Height (Calc)	Height %	Height % (Calc)	Height Sum% (Calc)
		406.328	406.329		2.06	4097.6	100	100	100
274	HW_Dougles.d	DBSearch	Pyrimidifen	Used as insecticide	C20 H28 Cl N3 O2	22.753	395.221	377.186	82.13	82.13	1.65	Positive	4	10123	131698
Best	ID Source	Name	Formula		Score	RT Diff	Diff (ppm)	Score (Lib)	Score (DB)	Num Spectra	Precursor (Acq)
TRUE	DBSearch	Pyrimidifen	C20 H28 Cl N3 O2		82.13		1.65		82.13	0
	m/z	Species	Ion Formula		Score (MFG)	Score (MS)	Score (mass)	Score (iso. abund)	Score (iso. spacing)
	395.221	(M+NH4)+				82.13	97.74	51.34	87.87
		m/z	m/z (Calc)		Diff (ppm)	Height (Calc)	Height %	Height % (Calc)	Height Sum% (Calc)
		395.221	395.221		0.59	11546.5	100	100	60.1
275	HW_Dougles.d	DBSearch	N-stearoyl valine	Probably anti microbial	C23 H45 N O3	22.833	384.348	383.341	45.39	45.39	-2.37	Positive	2	4035	28892
Best	ID Source	Name	Formula		Score	RT Diff	Diff (ppm)	Score (Lib)	Score (DB)	Num Spectra	Precursor (Acq)
TRUE	DBSearch	N-stearoyl valine	C23 H45 N O3		45.39		-2.37		45.39	0
	m/z	Species	Ion Formula		Score (MFG)	Score (MS)	Score (mass)	Score (iso. abund)	Score (iso. spacing)
	384.347	(M+H)+				45.39	95.32	0	0
		m/z	m/z (Calc)		Diff (ppm)	Height (Calc)	Height %	Height % (Calc)	Height Sum% (Calc)
		384.348	384.347		-2.36	4034.6	100	100	100
276	HW_Dougles.d					23.265	851.61	850.603				Positive	2	1374	10469
277	HW_Dougles.d	DBSearch	N-Hexadecanoylpyrrolidine		C20 H39 N O	23.347	310.311	309.303	66.49	66.49	-0.93	Positive	2	8578	83212
Best	ID Source	Name	Formula		Score	RT Diff	Diff (ppm)	Score (Lib)	Score (DB)	Num Spectra	Precursor (Acq)
TRUE	DBSearch	N-Hexadecanoylpyrrolidine	C20 H39 N O		66.49		-0.93		66.49	0
	m/z	Species	Ion Formula		Score (MFG)	Score (MS)	Score (mass)	Score (iso. abund)	Score (iso. spacing)
	310.31	(M+H)+				66.49	99.41	25.69	49.64
		m/z	m/z (Calc)		Diff (ppm)	Height (Calc)	Height %	Height % (Calc)	Height Sum% (Calc)
		310.311	310.31		-1.14	9518.8	100	100	81.6
278	HW_Dougles.d					23.369	850.506	849.498				Positive	2	1368	9202
279	HW_Dougles.d	DBSearch	Hexacosanedioic acid		C26 H50 O4	23.454	427.378	426.371	69.51	69.51	-0.73	Positive	2	7183	152756
Best	ID Source	Name	Formula		Score	RT Diff	Diff (ppm)	Score (Lib)	Score (DB)	Num Spectra	Precursor (Acq)
TRUE	DBSearch	Hexacosanedioic acid	C26 H50 O4		69.51		-0.73		69.51	0
	m/z	Species	Ion Formula		Score (MFG)	Score (MS)	Score (mass)	Score (iso. abund)	Score (iso. spacing)
	427.378	(M+H)+				69.51	99.5	39.18	45.93
		m/z	m/z (Calc)		Diff (ppm)	Height (Calc)	Height %	Height % (Calc)	Height Sum% (Calc)
		427.378	427.378		-0.07	7717.3	100	100	77.6
280	HW_Dougles.d	DBSearch	Pipericine		C22 H41 N O	23.764	336.327	335.319	83.24	83.24	-1.62	Positive	2	5313	34064
Best	ID Source	Name	Formula		Score	RT Diff	Diff (ppm)	Score (Lib)	Score (DB)	Num Spectra	Precursor (Acq)
TRUE	DBSearch	Pipericine	C22 H41 N O		83.24		-1.62		83.24	0
	m/z	Species	Ion Formula		Score (MFG)	Score (MS)	Score (mass)	Score (iso. abund)	Score (iso. spacing)
	336.326	(M+H)+				83.24	98.05	86.62	49.58
		m/z	m/z (Calc)		Diff (ppm)	Height (Calc)	Height %	Height % (Calc)	Height Sum% (Calc)
		336.327	336.326		-1.79	5374.6	100	100	80.2
281	HW_Dougles.d					24.511	628.195	627.188				Positive	3	9088	85141
282	HW_Dougles.d					24.802	926.517	925.509				Positive	2	1511	6997
283	HW_Dougles.d	DBSearch	17,20-dimethyl Prostaglandin F1α		C22 H40 O5	24.914	423.252	384.288	66.87	66.87	-0.51	Positive	3	8568	119647
Best	ID Source	Name	Formula		Score	RT Diff	Diff (ppm)	Score (Lib)	Score (DB)	Num Spectra	Precursor (Acq)
TRUE	DBSearch	17,20-dimethyl Prostaglandin F1α	C22 H40 O5		66.87		-0.51		66.87	5
	m/z	Species	Ion Formula		Score (MFG)	Score (MS)	Score (mass)	Score (iso. abund)	Score (iso. spacing)
	423.251	(M+K)+				66.87	99.78	0.68	80.47
		m/z	m/z (Calc)		Diff (ppm)	Height (Calc)	Height %	Height % (Calc)	Height Sum% (Calc)
		423.252	423.251		-2.72	10861.3	100	100	73.8
284	HW_Dougles.d	DBSearch	N-Cyclohexanecarbonylpentadecylamine		C22 H43 N O	25.678	360.324	337.335	84.02	84.02	-0.8	Positive	2	12040	82674
Best	ID Source	Name	Formula		Score	RT Diff	Diff (ppm)	Score (Lib)	Score (DB)	Num Spectra	Precursor (Acq)
TRUE	DBSearch	N-Cyclohexanecarbonylpentadecylamine	C22 H43 N O		84.02		-0.8		84.02	0
	m/z	Species	Ion Formula		Score (MFG)	Score (MS)	Score (mass)	Score (iso. abund)	Score (iso. spacing)
	360.324	(M+Na)+				84.02	99.52	86.53	49.99
		m/z	m/z (Calc)		Diff (ppm)	Height (Calc)	Height %	Height % (Calc)	Height Sum% (Calc)
		360.324	360.324		-0.77	12182.4	100	100	80.2
285	HW_Dougles.d	DBSearch	N-Cyclohexanecarbonylpentadecylamine		C22 H43 N O	25.686	338.342	337.335	98.83	98.83	-1.51	Positive	5	205792	2248113
Best	ID Source	Name	Formula		Score	RT Diff	Diff (ppm)	Score (Lib)	Score (DB)	Num Spectra	Precursor (Acq)
TRUE	DBSearch	N-Cyclohexanecarbonylpentadecylamine	C22 H43 N O		98.83		-1.51		98.83	0
	m/z	Species	Ion Formula		Score (MFG)	Score (MS)	Score (mass)	Score (iso. abund)	Score (iso. spacing)
	338.342	(M+H)+				98.83	98.3	99.11	99.55
		m/z	m/z (Calc)		Diff (ppm)	Height (Calc)	Height %	Height % (Calc)	Height Sum% (Calc)
		338.342	338.342		-1.64	205815	100	100	78.2
286	HW_Dougles.d	DBSearch	3α,12α-Dihydroxy-5β-chol-8(14)-en-24-oic Acid		C24 H38 O4	25.735	391.285	390.277	82.1	82.1	-1.12	Positive	4	12664	185180
Best	ID Source	Name	Formula		Score	RT Diff	Diff (ppm)	Score (Lib)	Score (DB)	Num Spectra	Precursor (Acq)
TRUE	DBSearch	3α,12α-Dihydroxy-5β-chol-8(14)-en-24-oic Acid	C24 H38 O4		82.1		-1.12		82.1	0
	m/z	Species	Ion Formula		Score (MFG)	Score (MS)	Score (mass)	Score (iso. abund)	Score (iso. spacing)
	391.284	(M+H)+				82.1	98.92	80.85	49.97
		m/z	m/z (Calc)		Diff (ppm)	Height (Calc)	Height %	Height % (Calc)	Height Sum% (Calc)
		391.285	391.284		-1.07	12742.1	100	100	79
287	HW_Dougles.d	DBSearch	CAY10621		C26 H45 N O4	25.74	436.343	435.335	76.77	76.77	-1.36	Positive	2	8598	78495
Best	ID Source	Name	Formula		Score	RT Diff	Diff (ppm)	Score (Lib)	Score (DB)	Num Spectra	Precursor (Acq)
TRUE	DBSearch	CAY10621	C26 H45 N O4		76.77		-1.36		76.77	0
	m/z	Species	Ion Formula		Score (MFG)	Score (MS)	Score (mass)	Score (iso. abund)	Score (iso. spacing)
	436.342	(M+H)+				76.77	98.25	63.51	49.75
		m/z	m/z (Calc)		Diff (ppm)	Height (Calc)	Height %	Height % (Calc)	Height Sum% (Calc)
		436.343	436.342		-1.49	8887.9	100	100	77.4
288	HW_Dougles.d	DBSearch	Docosanedioic acid		C22 H42 O4	25.868	371.317	370.31	72.03	72.03	-4.65	Positive	4	11777	208569
Best	ID Source	Name	Formula		Score	RT Diff	Diff (ppm)	Score (Lib)	Score (DB)	Num Spectra	Precursor (Acq)
TRUE	DBSearch	Docosanedioic acid	C22 H42 O4		72.03		-4.65		72.03	0
	m/z	Species	Ion Formula		Score (MFG)	Score (MS)	Score (mass)	Score (iso. abund)	Score (iso. spacing)
	371.316	(M+H)+				72.03	83.66	71.53	49.36
		m/z	m/z (Calc)		Diff (ppm)	Height (Calc)	Height %	Height % (Calc)	Height Sum% (Calc)
		371.317	371.316		-4.42	12173.8	100	100	80.4
289	HW_Dougles.d	DBSearch	Tetracosanedioic acid		C24 H46 O4	25.871	416.373	398.339	77.37	77.37	0.23	Positive	2	7063	74909
Best	ID Source	Name	Formula		Score	RT Diff	Diff (ppm)	Score (Lib)	Score (DB)	Num Spectra	Precursor (Acq)
TRUE	DBSearch	Tetracosanedioic acid	C24 H46 O4		77.37		0.23		77.37	0
	m/z	Species	Ion Formula		Score (MFG)	Score (MS)	Score (mass)	Score (iso. abund)	Score (iso. spacing)
	416.373	(M+NH4)+				77.37	99.95	63.38	48.98
		m/z	m/z (Calc)		Diff (ppm)	Height (Calc)	Height %	Height % (Calc)	Height Sum% (Calc)
		416.373	416.373		0.5	7347.1	100	100	78.7

## Sheet: Table s2
Cpd	File	ID Source	Name		Formula	RT	m/z	Mass	Score	Score (DB)	Diff (DB, ppm)	Polarity	Ions	Height	Vol
1	HW_Dougles.d	DBSearch	1,2-Dihydroxy-3-keto-5-methylthiopentene		C6 H10 O3 S	0.85	185.024	162.034	60.7	60.7	6.56	Positive	2	15202	69660
2	HW_Dougles.d					0.85	271.918	270.91				Positive	3	6120	44995
3	HW_Dougles.d					0.851	167.013	166.006				Positive	2	62176	257273
4	HW_Dougles.d	DBSearch	Dimethyl trisulfide	Fungus growth inhibitions	C2 H6 S3	0.851	143.997	125.963	74.61	74.61	-1.17	Positive	3	136600	594048
5	HW_Dougles.d					0.851	117.998	233.982				Positive	3	6219	28820
6	HW_Dougles.d					0.851	125.986	124.979				Positive	2	717224	2937270
7	HW_Dougles.d					0.851	223.989	222.982				Positive	3	8685	42526
8	HW_Dougles.d					0.851	110.009	109.002				Positive	2	83194	392765
9	HW_Dougles.d	DBSearch	1-Isothiocyanato-2-(methylthio)ethane		C4 H7 N S2	0.852	151.035	133.001	52.9	52.9	5.95	Positive	2	34443	173260
10	HW_Dougles.d					0.852	255.945	254.937				Positive	2	70981	283733
11	HW_Dougles.d					0.852	239.967	238.959				Positive	3	40329	197283
12	HW_Dougles.d					0.852	128.017	127.01				Positive	2	20883	97399
13	HW_Dougles.d					0.853	198.94	197.933				Positive	3	22006	108003
14	HW_Dougles.d					0.853	539.817	516.827				Positive	2	2239	11516
15	HW_Dougles.d					0.853	430.863	429.857				Positive	3	5087	27225
16	HW_Dougles.d	DBSearch	Methylselenopyruvate		C4 H6 O3 Se	0.853	214.918	175.955	58.65	58.65	-5.84	Positive	3	158595	629559
17	HW_Dougles.d					0.853	273.955	272.948				Positive	2	26001	111162
18	HW_Dougles.d					0.853	474.835	473.827				Positive	3	15839	59715
19	HW_Dougles.d					0.853	344.876	343.869				Positive	3	27893	110527
20	HW_Dougles.d					0.853	257.977	256.97				Positive	2	10584	49902
21	HW_Dougles.d					0.856	300.905	299.898				Positive	2	7386	32046
22	HW_Dougles.d					0.875	959.966	958.959				Positive	2	11704	46184
23	HW_Dougles.d	DBSearch	(E)-2-Methyl-2-buten-1-ol O-beta-D-Glucopyranoside		C11 H20 O6	0.914	266.159	248.125	80.51	80.51	4.34	Positive	2	39896	131861
24	HW_Dougles.d					0.919	130.526	259.038				Positive	2	14684	43994
25	HW_Dougles.d	DBSearch	Panose		C18 H32 O16	0.941	543.132	504.17	61.09	61.09	-0.83	Positive	2	7902	30326
26	HW_Dougles.d	DBSearch	Licoagroside B		C18 H24 O12	0.941	455.117	432.128	74.96	74.96	-2.33	Positive	2	12685	40906
27	HW_Dougles.d	DBSearch	Theobromine	theobromine is used as a vasodilator, a diuretic, and heart stimulant. And similar to caffeine, it may be useful in management of fatigue and orthostatic hypotensio	C7 H8 N4 O2	0.942	219.028	180.065	85.06	85.06	-2.97	Positive	3	27846	98211
28	HW_Dougles.d	DBSearch	Nigerose (Sakebiose)		C12 H22 O11	0.943	381.08	342.117	94.18	94.18	-3.55	Positive	3	64409	246170
29	HW_Dougles.d	DBSearch	Cyclopenthiazide	High blood pressure, heart failure water retention	C13 H18 Cl N3 O4 S2	0.946	397.077	379.044	55.32	55.32	-3.83	Positive	3	9652	35517
30	HW_Dougles.d	DBSearch	tert-butyl p-(bromomethyl) Benzoate		C12 H15 Br O2	0.948	288.06	270.027	43.81	43.81	-3.75	Positive	2	7219	37262
31	HW_Dougles.d					0.95	279.051	278.044				Positive	2	6117	30533
32	HW_Dougles.d	DBSearch	Nigerose (Sakebiose)		C12 H22 O11	0.952	365.104	342.116	73.11	73.11	1.23	Positive	2	14176	58404
33	HW_Dougles.d					0.954	266.133	265.126				Positive	2	35109	98773
34	HW_Dougles.d					0.955	293.063	292.056				Positive	4	21572	125741
35	HW_Dougles.d	DBSearch	Nigerose (Sakebiose)		C12 H22 O11	0.976	360.151	342.117	81.64	81.64	-1.17	Positive	3	23552	139985
36	HW_Dougles.d	DBSearch	3-Hydroxy-3-methyl-glutaric acid		C6 H10 O5	0.983	180.087	162.052	73.02	73.02	4.39	Positive	5	24978	346667
37	HW_Dougles.d					0.984	119.034	118.028				Positive	2	1917	15106
38	HW_Dougles.d	DBSearch	D-Fructuronic acid		C6 H10 O7	0.987	212.077	194.043	47.29	47.29	-1.32	Positive	2	9707	54640
39	HW_Dougles.d					0.988	194.067	176.033				Positive	2	7124	39134
40	HW_Dougles.d	DBSearch	Galactosylglycerol		C9 H18 O8	0.989	255.107	254.099	46.29	46.29	4.99	Positive	3	6801	42193
41	HW_Dougles.d					0.989	429.033	428.026				Positive	3	11346	91374
42	HW_Dougles.d	DBSearch	2-Hydroxy-3,4-dimethoxybenzoic Acid		C9 H10 O5	0.99	216.087	198.053	73.24	73.24	-1.12	Positive	4	15480	87751
43	HW_Dougles.d					0.999	443.012	442.004				Positive	2	4577	28539
44	HW_Dougles.d	DBSearch	N-(1-Deoxy-1-fructosyl)proline		C11 H19 N O7	1.002	278.124	277.116	84.41	84.41	1.7	Positive	3	41183	211934
45	HW_Dougles.d	DBSearch	Osmaronin		C11 H17 N O6	1.003	260.113	259.105	75.27	75.27	1.39	Positive	2	11750	56380
46	HW_Dougles.d	DBSearch	5'-O-beta-D-Glucosylpyridoxine		C14 H21 N O8	1.012	332.134	331.127	74.28	74.28	-1.55	Positive	2	10053	58090
47	HW_Dougles.d					1.025	316.159	298.126				Positive	2	2659	19904
48	HW_Dougles.d	DBSearch	8-Amino Caprylic acid		C8 H17 N O2	1.042	160.133	159.126	87.68	87.68	0.83	Positive	2	22696	93593
49	HW_Dougles.d	DBSearch	SWEP		C8 H7 Cl2 N O2	1.142	241.975	218.986	49.26	49.26	-3.11	Positive	2	7046	36816
50	HW_Dougles.d	DBSearch	Oxaloglutarate		C7 H8 O7	1.169	222.061	204.027	85.11	85.11	-1.94	Positive	2	13239	93058
51	HW_Dougles.d	DBSearch	(S)-2,3,4,5-Tetrahydropiperidine-2-carboxylate		C6 H9 N O2	1.223	128.071	127.063	69.81	69.81	1.74	Positive	3	10510	76681
52	HW_Dougles.d	DBSearch	Alendronic acid	Osteoporosis	C4 H13 N O7 P2	1.238	287.98	249.018	62.04	62.04	-5.14	Positive	3	12021	88566
53	HW_Dougles.d	DBSearch	Octulose-1,8-bisphosphate		C8 H18 O14 P2	1.243	438.981	400.018	77.7	77.7	-2.57	Positive	3	17408	75641
54	HW_Dougles.d	DBSearch	Aconitic acid		C6 H6 O6	1.243	175.024	174.017	81.33	81.33	-1.85	Positive	2	21168	99816
55	HW_Dougles.d	DBSearch	Citric acid	flaovouring and perservation	C6 H8 O7	1.244	210.061	192.027	80.23	80.23	-1.29	Positive	3	25478	184972
56	HW_Dougles.d	DBSearch	Muconic dialdehyde		C6 H6 O2	1.672	128.071	110.037	47.35	47.35	-1.78	Positive	2	18918	88201
57	HW_Dougles.d	DBSearch	Hypoglycin	cause vomitting, food poisoning	C7 H11 N O2	1.74	159.112	141.078	46.2	46.2	3.44	Positive	2	10890	102514
58	HW_Dougles.d	DBSearch	2-Acetyl-1-ethylpyrrole		C8 H11 N O	1.901	138.091	137.084	87.3	87.3	0.42	Positive	2	15127	59858
59	HW_Dougles.d					2.249	439.054	438.046				Positive	2	12062	56191
60	HW_Dougles.d	DBSearch	Phosphocreatine		C4 H10 N3 O5 P	2.252	423.081	211.038	32.13	32.13	-9.46	Positive	2	1754	12947
61	HW_Dougles.d					2.252	288.017	287.01				Positive	2	8787	61604
62	HW_Dougles.d					2.55	195.123	194.116				Positive	2	25104	136465
63	HW_Dougles.d	DBSearch	Pirbuterol	relieve cough, wheezing, shortness of breath, and troubled breathing by increasing the flow of air through the bronchial tubes	C12 H20 N2 O3	2.797	258.182	240.148	79.82	79.82	-2.51	Positive	3	21636	148093
64	HW_Dougles.d	DBSearch	Val Leu		C11 H22 N2 O3	3.17	231.17	230.163	85.92	85.92	-0.43	Positive	2	24762	160762
65	HW_Dougles.d	DBSearch	Vernolepin	Anti tumor	C15 H16 O5	3.336	294.134	276.1	85.93	85.93	-0.14	Positive	2	17127	98876
66	HW_Dougles.d	DBSearch	Ammodendrine		C12 H20 N2 O	3.363	226.192	208.158	85.59	85.59	-1.85	Positive	2	28389	218033
67	HW_Dougles.d	DBSearch	Leucyl-Hydroxyproline		C11 H20 N2 O4	3.459	245.15	244.143	85.42	85.42	-1.4	Positive	2	7311	42331
68	HW_Dougles.d					4.566	239.149	238.142				Positive	3	14018	96534
69	HW_Dougles.d					5.523	259.166	258.158				Positive	4	69394	359226
70	HW_Dougles.d					5.602	272.197	271.19				Positive	2	20567	164373
71	HW_Dougles.d	DBSearch	3-Hydroxymonoethylglycylxylidide (3-Hydroxy-MEGX)		C12 H18 N2 O2	5.968	240.171	222.137	83.13	83.13	-1.21	Positive	2	11667	50871
72	HW_Dougles.d					6.135	283.175	282.168				Positive	4	16743	97535
73	HW_Dougles.d					6.407	371.266	370.259				Positive	3	30547	143922
74	HW_Dougles.d	DBSearch	2,5-Dimethoxycinnamic acid		C11 H12 O4	6.459	209.081	208.074	86.18	86.18	-0.66	Positive	2	14441	58837
75	HW_Dougles.d	DBSearch	N-Succinyl-2-amino-6-ketopimelate		C11 H15 N O8	6.461	312.069	289.079	47.28	47.28	1.06	Positive	2	2072	12280
76	HW_Dougles.d	DBSearch	Zizybeoside I		C19 H28 O11	6.493	450.197	432.163	80.54	80.54	-0.52	Positive	2	12573	45558
77	HW_Dougles.d	DBSearch	Val Ile Leu		C17 H33 N3 O4	6.604	344.255	343.248	84.78	84.78	-1.39	Positive	3	39663	175994
78	HW_Dougles.d					6.613	339.276	338.269				Positive	2	56912	236540
79	HW_Dougles.d	DBSearch	2,5-Dimethoxycinnamic acid		C11 H12 O4	6.645	209.081	208.074	86.59	86.59	-0.24	Positive	2	62941	236396
80	HW_Dougles.d					6.648	835.284	834.277				Positive	2	10892	38309
81	HW_Dougles.d	DBSearch	Perindoprilat	Hypertension activities	C17 H28 N2 O5	6.73	358.234	340.2	83.62	83.62	-1.31	Positive	2	19306	73941
82	HW_Dougles.d					6.814	344.231	326.196				Positive	3	20566	89118
83	HW_Dougles.d	DBSearch	W123		C17 H26 N2 O3	6.894	324.228	306.195	83.21	83.21	-1.11	Positive	2	20988	80215
84	HW_Dougles.d	DBSearch	Pro Gln Pro		C15 H24 N4 O5	6.928	358.207	340.173	41	41	4.44	Positive	2	6867	20958
85	HW_Dougles.d	DBSearch	8Z-Decene-4,6-diynoic acid		C10 H10 O2	7.028	163.075	162.068	79.53	79.53	2.43	Positive	2	18557	62966
86	HW_Dougles.d					7.159	385.281	384.274				Positive	3	28779	144470
87	HW_Dougles.d					7.229	372.25	371.242				Positive	6	103629	478023
88	HW_Dougles.d					7.276	388.254	370.221				Positive	3	20660	88964
89	HW_Dougles.d	DBSearch	2-Phenylethyl 3-methylbutanoate		C13 H18 O2	7.292	207.138	206.131	85.77	85.77	0.38	Positive	2	19736	71626
90	HW_Dougles.d					7.311	356.255	355.248				Positive	3	15430	130975
91	HW_Dougles.d					7.342	484.349	483.342				Positive	3	14858	74608
92	HW_Dougles.d	DBSearch	Crosatoside B		C20 H30 O11	7.386	464.212	446.179	78.11	78.11	0.27	Positive	2	8566	31918
93	HW_Dougles.d	DBSearch	(R)-Roscovitine	treat cancers, neurodegenerative diseases, inflammation, viral infections, polycystic kidney disease and glomerulonephritis.	C19 H26 N6 O	7.452	372.25	354.216	84.72	84.72	1.05	Positive	2	7579	28624
94	HW_Dougles.d					7.454	452.36	451.353				Positive	5	43723	201142
95	HW_Dougles.d					7.504	457.339	456.332				Positive	3	23011	108758
96	HW_Dougles.d	DBSearch	Phlorisobutyrophenone		C10 H12 O4	7.541	197.081	196.073	86.06	86.06	1.76	Positive	2	25967	82869
97	HW_Dougles.d	DBSearch	Funtumine	induce cell Death in cancer cells	C21 H35 N O	7.557	340.26	317.271	80.5	80.5	2.91	Positive	2	8610	29161
98	HW_Dougles.d	DBSearch	PE(16:0/0:0)		C21 H44 N O7 P	7.607	471.319	453.285	75.27	75.27	1.3	Positive	2	8377	35224
99	HW_Dougles.d					7.608	353.255	352.248				Positive	2	14805	50907
100	HW_Dougles.d					7.633	432.281	414.247				Positive	3	19924	84132
101	HW_Dougles.d	DBSearch	Acebutolol	High blood pressure treatment	C18 H28 N2 O4	7.696	354.24	336.205	67.31	67.31	-1.9	Positive	2	4792	24710
102	HW_Dougles.d	DBSearch	8Z-Decene-4,6-diynoic acid		C10 H10 O2	7.713	163.076	162.068	87.14	87.14	-0.82	Positive	2	10853	33092
103	HW_Dougles.d	DBSearch	Palmitoyl Serotonin		C26 H42 N2 O2	7.716	437.312	414.323	74.97	74.97	4.03	Positive	2	13174	51490
104	HW_Dougles.d					7.745	446.26	445.253				Positive	2	6493	23751
105	HW_Dougles.d	DBSearch	17beta-Amino-5alpha-androstan-11beta-ol		C19 H33 N O	7.783	314.245	291.256	84.54	84.54	0.43	Positive	2	7175	25625
106	HW_Dougles.d					7.836	498.365	497.358				Positive	3	15246	73358
107	HW_Dougles.d	DBSearch	1-(O-alpha-D-glucopyranosyl)-3-keto-(1,25R)-hexacosanediol		C32 H62 O8	7.876	597.434	574.445	46.48	46.48	-1.41	Positive	2	4288	33741
108	HW_Dougles.d					7.914	215.175	214.168				Positive	7	218755	985981
109	HW_Dougles.d					7.915	114.091	113.083				Positive	3	38892	155800
110	HW_Dougles.d	DBSearch	Arg Arg Gln		C17 H34 N10 O5	7.926	476.307	458.273	75.73	75.73	-4	Positive	3	19783	77893
111	HW_Dougles.d					7.932	507.316	242.163				Positive	2	3702	31039
112	HW_Dougles.d	DBSearch	PE(17:0/0:0)		C22 H46 N O7 P	7.935	485.334	467.3	90.98	90.98	2.31	Positive	3	29656	143964
113	HW_Dougles.d					7.961	565.444	564.438				Positive	4	19231	141491
114	HW_Dougles.d					8.052	469.339	468.331				Positive	2	15056	109905
115	HW_Dougles.d	DBSearch	Apigenin 7-glucuronosyl-(1->2)-glucuronide		C27 H26 O17	8.071	623.123	622.116	95.83	95.83	1.56	Positive	3	23458	116332
116	HW_Dougles.d	DBSearch	Solanocapsine		C27 H46 N2 O2	8.124	453.344	430.354	74.26	74.26	4.12	Positive	2	10943	68747
117	HW_Dougles.d	DBSearch	2-{2-[4[(2-Hydroxy-3-isopropylaminopropoxy)-benzyloxy]ethoxy}-propionic acid		C18 H29 N O6	8.159	373.234	355.2	83.26	83.26	-1.44	Positive	2	19629	72890
118	HW_Dougles.d					8.177	520.333	519.325				Positive	2	18096	67498
119	HW_Dougles.d					8.219	550.397	549.39				Positive	3	7829	34151
120	HW_Dougles.d	DBSearch	Loganin	neuroprotective and anti-inflammatory	C17 H26 O10	8.222	408.186	390.153	82.48	82.48	0.09	Positive	7	12859	110909
121	HW_Dougles.d	DBSearch	Methylorsellinic Acid, Ethyl Ester		C11 H14 O4	8.223	211.096	210.089	86.66	86.66	0.24	Positive	2	61187	207533
122	HW_Dougles.d	DBSearch	Depdecin		C11 H16 O5	8.223	229.107	228.1	85.57	85.57	-1.28	Positive	2	18787	59819
123	HW_Dougles.d	DBSearch	3-(3-Indolyl)-2-oxopropanoic acid		C11 H9 N O3	8.224	445.08	203.059	44.37	44.37	-4.11	Positive	2	3517	29312
124	HW_Dougles.d					8.273	355.764	709.511				Positive	3	5692	33254
125	HW_Dougles.d					8.285	611.449	305.221				Positive	4	7954	84019
126	HW_Dougles.d					8.308	467.328	466.32				Positive	3	6524	40773
127	HW_Dougles.d					8.325	339.768	677.521				Positive	5	19093	123202
128	HW_Dougles.d					8.386	598.417	597.41				Positive	7	30034	196185
129	HW_Dougles.d					8.399	564.359	563.352				Positive	2	15220	58857
130	HW_Dougles.d	DBSearch	PE-Cer(d14:1(4E)/20:0)		C36 H73 N2 O6 P	8.413	683.508	660.519	69.62	69.62	2.54	Positive	3	4393	41998
131	HW_Dougles.d	DBSearch	Megastachine		C20 H29 N O3	8.507	349.247	331.213	40.59	40.59	4.65	Positive	2	2083	15568
132	HW_Dougles.d					8.581	412.306	822.598				Positive	2	4407	20619
133	HW_Dougles.d					8.59	663.481	331.237				Positive	2	3177	21239
134	HW_Dougles.d					8.596	608.386	607.378				Positive	2	12552	46734
135	HW_Dougles.d	DBSearch	PG(O-20:0/18:1(9Z))		C44 H87 O9 P	8.607	396.31	790.605	83.84	83.84	4.34	Positive	3	12480	65612
136	HW_Dougles.d	DBSearch	PE(18:3(9Z,12Z,15Z)/P-18:1(9Z))		C41 H74 N O7 P	8.617	362.769	723.523	59.58	59.58	-3.19	Positive	3	4387	24584
137	HW_Dougles.d					8.664	566.426	565.419				Positive	7	45609	264006
138	HW_Dougles.d	DBSearch	(22E)-(25S)-26,26,26-trifluoro-1α,25-dihydroxy-22,23-didehydrovitamin D3 / (22E)-(25S)-26,26,26-trifluoro-1α,25-dihydroxy-22,23-didehydrocholecalciferol		C27 H39 F3 O3	8.683	486.317	468.283	68.33	68.33	4.61	Positive	2	8942	35529
139	HW_Dougles.d					8.711	580.408	579.401				Positive	3	4380	28624
140	HW_Dougles.d					8.724	356.255	710.495				Positive	6	15371	132679
141	HW_Dougles.d					8.776	652.413	317.189				Positive	3	8429	73514
142	HW_Dougles.d					8.818	328.26	327.252				Positive	6	234438	1064411
143	HW_Dougles.d	DBSearch	PS(22:0/22:0)		C50 H98 N O10 P	8.838	452.853	903.69	50.87	50.87	3.34	Positive	2	4960	24299
144	HW_Dougles.d					8.871	695.505	694.499				Positive	4	3695	35709
145	HW_Dougles.d					8.885	419.313	836.612				Positive	2	3026	13228
146	HW_Dougles.d	DBSearch	3-(2,5-Dimethoxyphenyl)propanoic acid		C11 H14 O4	8.91	211.097	210.09	83.47	83.47	-3.89	Positive	2	17611	73064
147	HW_Dougles.d					8.987	412.797	823.579				Positive	5	15207	99473
148	HW_Dougles.d					9	693.492	346.242				Positive	3	3181	34901
149	HW_Dougles.d	DBSearch	DAT(18:0/24:0(2Me[S],3OH[S],4Me[S],6Me[S]))		C57 H108 O14	9.026	509.396	1016.78	54.01	54.01	-2.57	Positive	2	2141	8892
150	HW_Dougles.d					9.052	679.924	678.917				Positive	2	2652	11248
151	HW_Dougles.d	DBSearch	GlcCer(d18:0/16:0)		C40 H79 N O8	9.054	724.57	701.58	68.94	68.94	0.71	Positive	2	5353	27146
152	HW_Dougles.d					9.054	679.511	678.505				Positive	11	112674	1034703
153	HW_Dougles.d	DBSearch	Calenduloside G methyl ester		C43 H68 O14	9.055	831.452	808.464	49.82	49.82	-3.76	Positive	2	2805	14023
154	HW_Dougles.d					9.09	379.249	739.458				Positive	4	5218	39512
155	HW_Dougles.d					9.092	740.466	361.216				Positive	2	2601	21543
156	HW_Dougles.d	DBSearch	Acacetin 7-glucuronide		C22 H20 O11	9.108	461.108	460.101	47.4	47.4	-0.68	Positive	3	4545	39900
157	HW_Dougles.d	DBSearch	Catechin 5-O-gallate		C22 H18 O10	9.109	443.099	442.091	77.52	77.52	-2.95	Positive	2	7064	27705
158	HW_Dougles.d	DBSearch	4-(2-hydroxypropoxy)-3,5-dimethyl-Phenol		C11 H16 O3	9.113	197.117	196.11	83.69	83.69	0.21	Positive	2	11790	43744
159	HW_Dougles.d					9.124	404.8	807.586				Positive	3	4072	33571
160	HW_Dougles.d	DBSearch	PI(20:0/21:0)		C50 H97 O13 P	9.202	469.339	936.662	79.8	79.8	4.62	Positive	3	8281	46662
161	HW_Dougles.d	DBSearch	PE(18:4(6Z,9Z,12Z,15Z)/22:6(4Z,7Z,10Z,13Z,16Z,19Z))		C45 H70 N O8 P	9.228	401.263	783.485	66.04	66.04	-0.88	Positive	5	6997	51768
162	HW_Dougles.d	DBSearch	N-(3-Oxododecanoyl)homoserine lactone	a pivotal QS molecule, which regulates numerous virulence genes in P. aeruginosa and exhibits broad biological modulation effects in mammalian cells.	C16 H27 N O4	9.233	315.228	297.194	83.91	83.91	-1.26	Positive	2	14446	50047
163	HW_Dougles.d					9.235	403.792	805.568				Positive	3	3320	19604
164	HW_Dougles.d					9.29	441.344	440.337				Positive	6	125836	627087
165	HW_Dougles.d					9.329	397.124	792.234				Positive	2	2182	8034
166	HW_Dougles.d					9.331	396.802	791.589				Positive	13	110888	1208662
167	HW_Dougles.d	DBSearch	c		C51 H90 O7	9.331	837.655	814.665	49.01	49.01	4.71	Positive	2	3714	15914
168	HW_Dougles.d	DBSearch	Halstoctacosanolide A	Antimicrobial metabolite	C48 H76 O12	9.351	423.275	844.527	27.68	27.68	8.55	Positive	3	7234	55933
169	HW_Dougles.d	DBSearch	Ethyl 3-(N-butylacetamido)propionate	Insect repellent	C11 H21 N O3	9.376	216.159	215.152	86.53	86.53	1.4	Positive	2	27585	102288
170	HW_Dougles.d					9.389	525.882	1049.75				Positive	2	2341	12186
171	HW_Dougles.d	DBSearch	5''-Phosphoribostamycin		C17 H35 N4 O13 P	9.413	552.227	534.194	77.52	77.52	0.49	Positive	2	10506	47555
172	HW_Dougles.d	DBSearch	Isoeugenitol	traditional medicine as a remedy for colic, flatulence and indigestion	C11 H10 O4	9.421	207.065	206.058	85.37	85.37	-0.2	Positive	2	11915	45399
173	HW_Dougles.d					9.427	460.333	918.652				Positive	2	3308	15863
174	HW_Dougles.d					9.477	430.264	858.514				Positive	2	3252	13013
175	HW_Dougles.d					9.481	445.288	888.561				Positive	2	9201	38096
176	HW_Dougles.d					9.545	453.344	904.672				Positive	6	16720	108004
177	HW_Dougles.d					9.591	452.277	902.54				Positive	2	3422	14526
178	HW_Dougles.d					9.594	467.301	932.588				Positive	2	8788	37248
179	HW_Dougles.d					9.603	554.428	553.42				Positive	7	58664	388783
180	HW_Dougles.d					9.658	428.311	427.304				Positive	2	8556	32921
181	HW_Dougles.d					9.701	489.314	976.614				Positive	2	7025	33273
182	HW_Dougles.d	DBSearch	Artonin K	anti cnacer, lung cancer	C21 H18 O7	9.783	383.113	382.105	75.5	75.5	-0.4	Positive	2	6986	158754
183	HW_Dougles.d					9.8	511.329	1020.64				Positive	2	5577	27308
184	HW_Dougles.d					9.827	329.244	328.237				Positive	3	43530	186922
185	HW_Dougles.d					9.834	667.511	666.504				Positive	8	23161	231079
186	HW_Dougles.d	DBSearch	Phytosphingosine		C18 H39 N O3	9.896	356.255	317.292	64.27	64.27	3.44	Positive	2	11025	40144
187	HW_Dougles.d					9.897	533.34	1064.66				Positive	2	5745	24313
188	HW_Dougles.d					9.912	540.265	539.258				Positive	2	6078	24456
189	HW_Dougles.d					9.985	555.353	1108.69				Positive	2	4252	18249
190	HW_Dougles.d					10.012	390.802	779.588				Positive	7	19034	161066
191	HW_Dougles.d	DBSearch	Ganglioside GM3 (d18:1/16:0)		C57 H104 N2 O21	10.069	577.366	1152.72	48.28	48.28	-3.91	Positive	2	3184	16024
192	HW_Dougles.d					10.074	580.333	579.326				Positive	2	11003	59635
193	HW_Dougles.d	DBSearch	(25S)-3-oxo-12beta-acetoxy-cholest-1,4-dien-26-oic acid		C30 H44 O5	10.094	485.326	484.319	76.46	76.46	0.14	Positive	2	6519	29579
194	HW_Dougles.d					10.099	786.314	1570.61				Positive	3	4052	26920
195	HW_Dougles.d					10.111	442.329	441.321				Positive	3	29476	123839
196	HW_Dougles.d					10.158	447.344	892.673				Positive	4	11348	72402
197	HW_Dougles.d					10.179	469.339	468.332				Positive	2	9052	33820
198	HW_Dougles.d					10.24	580.331	579.323				Positive	2	5179	25984
199	HW_Dougles.d					10.269	720.291	1438.57				Positive	2	2409	12545
200	HW_Dougles.d					10.274	503.885	1005.75				Positive	2	2761	12226
201	HW_Dougles.d	DBSearch	(25R)-5alpha-spirostan-3beta,6alpha,23S-triol 6-O-beta-D-glucopyranoside		C34 H58 O10	10.275	649.391	626.403	68.32	68.32	-0.15	Positive	2	3716	16011
202	HW_Dougles.d	DBSearch	Pristimerol		C30 H42 O4	10.275	467.315	466.308	74.15	74.15	1.04	Positive	2	4919	24466
203	HW_Dougles.d	DBSearch	Liquoric acid	anti microbial, antioxidant, cytotoxic	C30 H44 O5	10.278	485.326	484.319	73.72	73.72	0.13	Positive	2	7597	43523
204	HW_Dougles.d					10.306	577.391	277.202				Positive	2	1683	12451
205	HW_Dougles.d	DBSearch	LysoPE(0:0/22:0)		C27 H56 N O7 P	10.307	555.411	537.377	67.28	67.28	4.32	Positive	2	13130	52869
206	HW_Dougles.d	DBSearch	DL-threo-PDMP		C23 H38 N2 O3	10.575	391.294	390.287	40.66	40.66	4.26	Positive	2	2478	15445
207	HW_Dougles.d	DBSearch	Deoxyloganin		C17 H26 O9	11.048	392.193	374.159	40.46	40.46	-4.42	Positive	2	4850	21149
208	HW_Dougles.d	DBSearch	Granisetron metabolite 4	nausea management	C17 H22 N4 O2	11.057	332.208	314.174	47.17	47.17	1.16	Positive	2	4714	22932
209	HW_Dougles.d	DBSearch	Jasmolone glucoside	Insecticide	C17 H26 O7	11.24	343.176	342.169	80.86	80.86	-2.87	Positive	2	20509	78070
210	HW_Dougles.d	DBSearch	Trp Val Gly		C18 H24 N4 O4	11.242	378.214	360.18	46.79	46.79	-1.48	Positive	2	6016	26183
211	HW_Dougles.d	DBSearch	Val Trp Val		C21 H30 N4 O4	11.421	420.26	402.226	81.12	81.12	0.6	Positive	2	7533	28911
212	HW_Dougles.d					11.557	464.286	463.279				Positive	2	6960	27841
213	HW_Dougles.d					11.676	508.312	507.305				Positive	2	6497	24878
214	HW_Dougles.d	DBSearch	Edulone A		C22 H22 O8	11.702	415.139	414.131	62.43	62.43	0.08	Positive	2	5566	150100
215	HW_Dougles.d					11.779	552.338	551.33				Positive	2	5911	23075
216	HW_Dougles.d	DBSearch	1-NBD-decanoyl-2-decanoyl-sn-Glycerol		C29 H46 N4 O8	11.875	596.364	578.33	71.83	71.83	2.41	Positive	2	5822	23265
217	HW_Dougles.d	DBSearch	NAc-FnorLRF-amide		C32 H46 N8 O5	11.957	640.39	622.356	65.19	65.19	4.21	Positive	2	5559	19989
218	HW_Dougles.d					12.031	684.416	683.409				Positive	2	4501	17727
219	HW_Dougles.d					12.1	728.442	727.435				Positive	2	4026	14132
220	HW_Dougles.d					12.166	772.467	385.73				Positive	2	2052	14355
221	HW_Dougles.d	DBSearch	PI(14:0/20:3(8Z,11Z,14Z))		C43 H77 O13 P	12.223	417.262	832.511	62.25	62.25	-1.13	Positive	2	3267	14649
222	HW_Dougles.d					12.276	439.277	876.54				Positive	2	3689	16345
223	HW_Dougles.d					12.332	461.29	920.566				Positive	2	3776	17315
224	HW_Dougles.d					12.377	483.305	964.595				Positive	2	3896	16655
225	HW_Dougles.d					12.421	505.316	1008.62				Positive	2	3731	17627
226	HW_Dougles.d					12.462	527.33	1052.64				Positive	2	3247	13655
227	HW_Dougles.d					12.502	549.343	1096.67				Positive	2	2914	13170
228	HW_Dougles.d					12.539	571.356	1140.7				Positive	2	2620	10948
229	HW_Dougles.d					12.578	593.371	1184.73				Positive	2	1989	9799
230	HW_Dougles.d	DBSearch	C16 Sphinganine		C16 H35 N O2	12.794	274.274	273.267	85.05	85.05	-1.74	Positive	2	13502	49369
231	HW_Dougles.d	DBSearch	Phytosphingosine	Anti-aging, hydration	C18 H39 N O3	12.898	318.301	317.293	78.82	78.82	-1.09	Positive	2	9258	34277
232	HW_Dougles.d					13.1	228.196	227.189				Positive	2	6631	80594
233	HW_Dougles.d	DBSearch	2,6-Nonadien-1-ol	flovouring (vege taste)	C9 H16 O	13.336	158.154	140.12	87.1	87.1	2.51	Positive	2	18146	112691
234	HW_Dougles.d	DBSearch	(-)-trans-C75		C14 H22 O4	13.652	255.159	254.152	86.26	86.26	-0.5	Positive	3	11635	60850
235	HW_Dougles.d	DBSearch	(S)-p-Mentha-1,8-dien-10-yl acetate		C12 H18 O2	15.016	195.138	194.131	81	81	-0.5	Positive	2	14540	62253
236	HW_Dougles.d					15.084	393.287	375.253				Positive	4	15519	108560
237	HW_Dougles.d	DBSearch	N-Methyldioctylamine		C17 H37 N	15.089	256.3	255.293	84.46	84.46	-0.84	Positive	2	13612	87802
238	HW_Dougles.d	DBSearch	His Met Lys		C17 H30 N6 O4 S	15.419	415.212	414.205	47.36	47.36	-0.77	Positive	3	5705	26514
239	HW_Dougles.d					16.854	221.133	220.126				Positive	2	7679	33931
240	HW_Dougles.d					17.228	603.341	602.334				Positive	2	2727	17519
241	HW_Dougles.d	DBSearch	Polysorbate 60		C22 H42 O8	18.122	452.322	434.288	81.38	81.38	-0.08	Positive	2	10357	67906
242	HW_Dougles.d	DBSearch	Emmotin A		C16 H22 O4	18.883	279.16	278.153	45.03	45.03	-3.02	Positive	2	6346	28766
243	HW_Dougles.d					18.971	149.023	148.016				Positive	2	48644	300550
244	HW_Dougles.d	DBSearch	Emmotin A	Terpenes	C16 H22 O4	18.974	279.159	278.152	81.05	81.05	-1.26	Positive	5	14079	142599
245	HW_Dougles.d					19.338	590.426	589.419				Positive	2	7532	61954
246	HW_Dougles.d					19.36	483.317	482.31				Positive	7	46121	438778
247	HW_Dougles.d					19.399	546.4	545.393				Positive	2	16029	110249
248	HW_Dougles.d	DBSearch	(25S)-5alpha-cholestan-3beta,6alpha,7beta,8beta,15alpha,16beta,26-heptol		C27 H48 O7	19.463	502.374	484.34	98.61	98.61	-0.41	Positive	3	20592	165189
249	HW_Dougles.d					19.5	458.349	457.341				Positive	2	15292	124232
250	HW_Dougles.d	DBSearch	24-Nor-5β-cholane-3α,7α,12α,22,23-pentol		C23 H40 O5	19.521	397.295	396.288	47.56	47.56	-0.38	Positive	2	2853	18880
251	HW_Dougles.d	DBSearch	N-stearoyl glutamic acid		C23 H43 N O5	19.522	414.321	413.314	76.54	76.54	0.41	Positive	2	9104	70157
252	HW_Dougles.d					19.685	439.291	438.283				Positive	2	4540	23687
253	HW_Dougles.d	DBSearch	Val Trp Val		C21 H30 N4 O4	20.283	403.234	402.226	47.43	47.43	0.66	Positive	2	2511	12853
254	HW_Dougles.d	DBSearch	28:2(5Z,9Z)(6Br)		C28 H51 Br O2	20.609	499.313	498.306	51.93	51.93	3.16	Positive	3	7466	47571
255	HW_Dougles.d					21.024	319.267	318.26				Positive	2	5143	27743
256	HW_Dougles.d					21.029	256.265	255.258				Positive	2	7442	35767
257	HW_Dougles.d	DBSearch	Dihydrostreptomycin 6-phosphate	Anti microbal	C21 H42 N7 O15 P	21.652	702.214	663.248	60.5	60.5	-0.61	Positive	3	2633	33394
258	HW_Dougles.d					21.875	777.232	776.225				Positive	3	3028	112695
259	HW_Dougles.d	DBSearch	1α,25-dihydroxy-3-deoxy-19-nor-22-oxavitamin D3 / 1α,25-dihydroxy-3-deoxy-19-nor-22-oxacholecalciferol	Vitamin D3 deriaratives	C25 H42 O3	22.187	408.348	390.314	81.63	81.63	-1.25	Positive	2	6255	40279
260	HW_Dougles.d					22.19	476.352	475.344				Positive	2	7239	44503
261	HW_Dougles.d					22.191	747.561	724.572				Positive	4	4042	29019
262	HW_Dougles.d					22.193	363.293	362.286				Positive	6	186859	1315495
263	HW_Dougles.d					22.194	464.376	463.369				Positive	2	7946	43621
264	HW_Dougles.d	DBSearch	Dihydrotachysterol	treatment for lack of calcium in blood	C28 H46 O	22.194	421.345	398.358	33.08	33.08	-7.51	Positive	2	4026	28407
265	HW_Dougles.d					22.323	531.408	530.401				Positive	3	3028	92719
266	HW_Dougles.d					22.473	779.232	778.225				Positive	3	4222	116379
267	HW_Dougles.d					22.475	804.264	803.256				Positive	3	2440	91182
268	HW_Dougles.d	DBSearch	Camptothecin	Anti cancer	C20 H16 N2 O4	22.588	371.101	348.111	58.54	58.54	-0.96	Positive	2	5924	29199
269	HW_Dougles.d					22.59	554.177	553.17				Positive	3	4137	28368
270	HW_Dougles.d	DBSearch	Hexacosanedioic acid	Breast cancer, colon cancer	C26 H50 O4	22.616	427.378	426.371	68.01	68.01	-0.92	Positive	2	5983	153501
271	HW_Dougles.d	DBSearch	Hexacosanedioic acid	Breast cancer, colon cancer	C26 H50 O4	22.742	449.36	426.371	80.43	80.43	0.75	Positive	2	5864	46376
272	HW_Dougles.d	DBSearch	Ganoderic acid DM	Prostate cancer treatment	C30 H44 O4	22.747	469.331	468.324	72.58	72.58	-0.14	Positive	2	3753	21674
273	HW_Dougles.d	DBSearch	N-stearoyl valine	anti microbial/fats	C23 H45 N O3	22.75	406.328	383.339	45.72	45.72	2.18	Positive	3	4098	31968
274	HW_Dougles.d	DBSearch	Pyrimidifen	Used as insecticide	C20 H28 Cl N3 O2	22.753	395.221	377.186	82.13	82.13	1.65	Positive	4	10123	131698
275	HW_Dougles.d	DBSearch	N-stearoyl valine	Probably anti microbial	C23 H45 N O3	22.833	384.348	383.341	45.39	45.39	-2.37	Positive	2	4035	28892
276	HW_Dougles.d					23.265	851.61	850.603				Positive	2	1374	10469
277	HW_Dougles.d	DBSearch	N-Hexadecanoylpyrrolidine		C20 H39 N O	23.347	310.311	309.303	66.49	66.49	-0.93	Positive	2	8578	83212
278	HW_Dougles.d					23.369	850.506	849.498				Positive	2	1368	9202
279	HW_Dougles.d	DBSearch	Hexacosanedioic acid		C26 H50 O4	23.454	427.378	426.371	69.51	69.51	-0.73	Positive	2	7183	152756
280	HW_Dougles.d	DBSearch	Pipericine		C22 H41 N O	23.764	336.327	335.319	83.24	83.24	-1.62	Positive	2	5313	34064
281	HW_Dougles.d					24.511	628.195	627.188				Positive	3	9088	85141
282	HW_Dougles.d					24.802	926.517	925.509				Positive	2	1511	6997
283	HW_Dougles.d	DBSearch	17,20-dimethyl Prostaglandin F1α		C22 H40 O5	24.914	423.252	384.288	66.87	66.87	-0.51	Positive	3	8568	119647
284	HW_Dougles.d	DBSearch	N-Cyclohexanecarbonylpentadecylamine		C22 H43 N O	25.678	360.324	337.335	84.02	84.02	-0.8	Positive	2	12040	82674
285	HW_Dougles.d	DBSearch	N-Cyclohexanecarbonylpentadecylamine		C22 H43 N O	25.686	338.342	337.335	98.83	98.83	-1.51	Positive	5	205792	2248113
286	HW_Dougles.d	DBSearch	3α,12α-Dihydroxy-5β-chol-8(14)-en-24-oic Acid		C24 H38 O4	25.735	391.285	390.277	82.1	82.1	-1.12	Positive	4	12664	185180
287	HW_Dougles.d	DBSearch	CAY10621		C26 H45 N O4	25.74	436.343	435.335	76.77	76.77	-1.36	Positive	2	8598	78495
288	HW_Dougles.d	DBSearch	Docosanedioic acid		C22 H42 O4	25.868	371.317	370.31	72.03	72.03	-4.65	Positive	4	11777	208569
289	HW_Dougles.d	DBSearch	Tetracosanedioic acid		C24 H46 O4	25.871	416.373	398.339	77.37	77.37	0.23	Positive	2	7063	74909

## Sheet: Table s3
Cpd	File	ID Source	Name		Formula	RT	m/z	Mass	Score	Score (DB)	Diff (DB, ppm)	Polarity	Ions	Height	Vol
1	HW_Dougles.d	DBSearch	1,2-Dihydroxy-3-keto-5-methylthiopentene		C6 H10 O3 S	0.85	185.024	162.034	60.7	60.7	6.56	Positive	2	15202	69660
4	HW_Dougles.d	DBSearch	Dimethyl trisulfide	Fungus growth inhibitions	C2 H6 S3	0.851	143.997	125.963	74.61	74.61	-1.17	Positive	3	136600	594048
9	HW_Dougles.d	DBSearch	1-Isothiocyanato-2-(methylthio)ethane		C4 H7 N S2	0.852	151.035	133.001	52.9	52.9	5.95	Positive	2	34443	173260
16	HW_Dougles.d	DBSearch	Methylselenopyruvate		C4 H6 O3 Se	0.853	214.918	175.955	58.65	58.65	-5.84	Positive	3	158595	629559
23	HW_Dougles.d	DBSearch	(E)-2-Methyl-2-buten-1-ol O-beta-D-Glucopyranoside		C11 H20 O6	0.914	266.159	248.125	80.51	80.51	4.34	Positive	2	39896	131861
25	HW_Dougles.d	DBSearch	Panose		C18 H32 O16	0.941	543.132	504.17	61.09	61.09	-0.83	Positive	2	7902	30326
26	HW_Dougles.d	DBSearch	Licoagroside B		C18 H24 O12	0.941	455.117	432.128	74.96	74.96	-2.33	Positive	2	12685	40906
27	HW_Dougles.d	DBSearch	Theobromine	theobromine is used as a vasodilator, a diuretic, and heart stimulant. And similar to caffeine, it may be useful in management of fatigue and orthostatic hypotensio	C7 H8 N4 O2	0.942	219.028	180.065	85.06	85.06	-2.97	Positive	3	27846	98211
28	HW_Dougles.d	DBSearch	Nigerose (Sakebiose)		C12 H22 O11	0.943	381.08	342.117	94.18	94.18	-3.55	Positive	3	64409	246170
29	HW_Dougles.d	DBSearch	Cyclopenthiazide	High blood pressure, heart failure water retention	C13 H18 Cl N3 O4 S2	0.946	397.077	379.044	55.32	55.32	-3.83	Positive	3	9652	35517
30	HW_Dougles.d	DBSearch	tert-butyl p-(bromomethyl) Benzoate		C12 H15 Br O2	0.948	288.06	270.027	43.81	43.81	-3.75	Positive	2	7219	37262
32	HW_Dougles.d	DBSearch	Nigerose (Sakebiose)		C12 H22 O11	0.952	365.104	342.116	73.11	73.11	1.23	Positive	2	14176	58404
35	HW_Dougles.d	DBSearch	Nigerose (Sakebiose)		C12 H22 O11	0.976	360.151	342.117	81.64	81.64	-1.17	Positive	3	23552	139985
36	HW_Dougles.d	DBSearch	3-Hydroxy-3-methyl-glutaric acid		C6 H10 O5	0.983	180.087	162.052	73.02	73.02	4.39	Positive	5	24978	346667
38	HW_Dougles.d	DBSearch	D-Fructuronic acid		C6 H10 O7	0.987	212.077	194.043	47.29	47.29	-1.32	Positive	2	9707	54640
40	HW_Dougles.d	DBSearch	Galactosylglycerol		C9 H18 O8	0.989	255.107	254.099	46.29	46.29	4.99	Positive	3	6801	42193
42	HW_Dougles.d	DBSearch	2-Hydroxy-3,4-dimethoxybenzoic Acid		C9 H10 O5	0.99	216.087	198.053	73.24	73.24	-1.12	Positive	4	15480	87751
44	HW_Dougles.d	DBSearch	N-(1-Deoxy-1-fructosyl)proline		C11 H19 N O7	1.002	278.124	277.116	84.41	84.41	1.7	Positive	3	41183	211934
45	HW_Dougles.d	DBSearch	Osmaronin		C11 H17 N O6	1.003	260.113	259.105	75.27	75.27	1.39	Positive	2	11750	56380
46	HW_Dougles.d	DBSearch	5'-O-beta-D-Glucosylpyridoxine		C14 H21 N O8	1.012	332.134	331.127	74.28	74.28	-1.55	Positive	2	10053	58090
48	HW_Dougles.d	DBSearch	8-Amino Caprylic acid		C8 H17 N O2	1.042	160.133	159.126	87.68	87.68	0.83	Positive	2	22696	93593
49	HW_Dougles.d	DBSearch	SWEP		C8 H7 Cl2 N O2	1.142	241.975	218.986	49.26	49.26	-3.11	Positive	2	7046	36816
50	HW_Dougles.d	DBSearch	Oxaloglutarate		C7 H8 O7	1.169	222.061	204.027	85.11	85.11	-1.94	Positive	2	13239	93058
51	HW_Dougles.d	DBSearch	(S)-2,3,4,5-Tetrahydropiperidine-2-carboxylate		C6 H9 N O2	1.223	128.071	127.063	69.81	69.81	1.74	Positive	3	10510	76681
52	HW_Dougles.d	DBSearch	Alendronic acid	Osteoporosis	C4 H13 N O7 P2	1.238	287.98	249.018	62.04	62.04	-5.14	Positive	3	12021	88566
53	HW_Dougles.d	DBSearch	Octulose-1,8-bisphosphate		C8 H18 O14 P2	1.243	438.981	400.018	77.7	77.7	-2.57	Positive	3	17408	75641
54	HW_Dougles.d	DBSearch	Aconitic acid		C6 H6 O6	1.243	175.024	174.017	81.33	81.33	-1.85	Positive	2	21168	99816
55	HW_Dougles.d	DBSearch	Citric acid	flaovouring and perservation	C6 H8 O7	1.244	210.061	192.027	80.23	80.23	-1.29	Positive	3	25478	184972
56	HW_Dougles.d	DBSearch	Muconic dialdehyde		C6 H6 O2	1.672	128.071	110.037	47.35	47.35	-1.78	Positive	2	18918	88201
57	HW_Dougles.d	DBSearch	Hypoglycin	cause vomitting, food poisoning	C7 H11 N O2	1.74	159.112	141.078	46.2	46.2	3.44	Positive	2	10890	102514
58	HW_Dougles.d	DBSearch	2-Acetyl-1-ethylpyrrole		C8 H11 N O	1.901	138.091	137.084	87.3	87.3	0.42	Positive	2	15127	59858
59	HW_Dougles.d					2.249	439.054	438.046				Positive	2	12062	56191
60	HW_Dougles.d	DBSearch	Phosphocreatine		C4 H10 N3 O5 P	2.252	423.081	211.038	32.13	32.13	-9.46	Positive	2	1754	12947
63	HW_Dougles.d	DBSearch	Pirbuterol	relieve cough, wheezing, shortness of breath, and troubled breathing by increasing the flow of air through the bronchial tubes	C12 H20 N2 O3	2.797	258.182	240.148	79.82	79.82	-2.51	Positive	3	21636	148093
64	HW_Dougles.d	DBSearch	Val Leu		C11 H22 N2 O3	3.17	231.17	230.163	85.92	85.92	-0.43	Positive	2	24762	160762
65	HW_Dougles.d	DBSearch	Vernolepin	Anti tumor	C15 H16 O5	3.336	294.134	276.1	85.93	85.93	-0.14	Positive	2	17127	98876
66	HW_Dougles.d	DBSearch	Ammodendrine		C12 H20 N2 O	3.363	226.192	208.158	85.59	85.59	-1.85	Positive	2	28389	218033
67	HW_Dougles.d	DBSearch	Leucyl-Hydroxyproline		C11 H20 N2 O4	3.459	245.15	244.143	85.42	85.42	-1.4	Positive	2	7311	42331
71	HW_Dougles.d	DBSearch	3-Hydroxymonoethylglycylxylidide (3-Hydroxy-MEGX)		C12 H18 N2 O2	5.968	240.171	222.137	83.13	83.13	-1.21	Positive	2	11667	50871
74	HW_Dougles.d	DBSearch	2,5-Dimethoxycinnamic acid		C11 H12 O4	6.459	209.081	208.074	86.18	86.18	-0.66	Positive	2	14441	58837
75	HW_Dougles.d	DBSearch	N-Succinyl-2-amino-6-ketopimelate		C11 H15 N O8	6.461	312.069	289.079	47.28	47.28	1.06	Positive	2	2072	12280
76	HW_Dougles.d	DBSearch	Zizybeoside I		C19 H28 O11	6.493	450.197	432.163	80.54	80.54	-0.52	Positive	2	12573	45558
77	HW_Dougles.d	DBSearch	Val Ile Leu		C17 H33 N3 O4	6.604	344.255	343.248	84.78	84.78	-1.39	Positive	3	39663	175994
79	HW_Dougles.d	DBSearch	2,5-Dimethoxycinnamic acid		C11 H12 O4	6.645	209.081	208.074	86.59	86.59	-0.24	Positive	2	62941	236396
81	HW_Dougles.d	DBSearch	Perindoprilat	Hypertension activities	C17 H28 N2 O5	6.73	358.234	340.2	83.62	83.62	-1.31	Positive	2	19306	73941
83	HW_Dougles.d	DBSearch	W123		C17 H26 N2 O3	6.894	324.228	306.195	83.21	83.21	-1.11	Positive	2	20988	80215
84	HW_Dougles.d	DBSearch	Pro Gln Pro		C15 H24 N4 O5	6.928	358.207	340.173	41	41	4.44	Positive	2	6867	20958
85	HW_Dougles.d	DBSearch	8Z-Decene-4,6-diynoic acid		C10 H10 O2	7.028	163.075	162.068	79.53	79.53	2.43	Positive	2	18557	62966
89	HW_Dougles.d	DBSearch	2-Phenylethyl 3-methylbutanoate		C13 H18 O2	7.292	207.138	206.131	85.77	85.77	0.38	Positive	2	19736	71626
92	HW_Dougles.d	DBSearch	Crosatoside B		C20 H30 O11	7.386	464.212	446.179	78.11	78.11	0.27	Positive	2	8566	31918
93	HW_Dougles.d	DBSearch	(R)-Roscovitine	treat cancers, neurodegenerative diseases, inflammation, viral infections, polycystic kidney disease and glomerulonephritis.	C19 H26 N6 O	7.452	372.25	354.216	84.72	84.72	1.05	Positive	2	7579	28624
96	HW_Dougles.d	DBSearch	Phlorisobutyrophenone		C10 H12 O4	7.541	197.081	196.073	86.06	86.06	1.76	Positive	2	25967	82869
97	HW_Dougles.d	DBSearch	Funtumine	induce cell Death in cancer cells	C21 H35 N O	7.557	340.26	317.271	80.5	80.5	2.91	Positive	2	8610	29161
98	HW_Dougles.d	DBSearch	PE(16:0/0:0)		C21 H44 N O7 P	7.607	471.319	453.285	75.27	75.27	1.3	Positive	2	8377	35224
101	HW_Dougles.d	DBSearch	Acebutolol	High blood pressure treatment	C18 H28 N2 O4	7.696	354.24	336.205	67.31	67.31	-1.9	Positive	2	4792	24710
102	HW_Dougles.d	DBSearch	8Z-Decene-4,6-diynoic acid		C10 H10 O2	7.713	163.076	162.068	87.14	87.14	-0.82	Positive	2	10853	33092
103	HW_Dougles.d	DBSearch	Palmitoyl Serotonin		C26 H42 N2 O2	7.716	437.312	414.323	74.97	74.97	4.03	Positive	2	13174	51490
105	HW_Dougles.d	DBSearch	17beta-Amino-5alpha-androstan-11beta-ol		C19 H33 N O	7.783	314.245	291.256	84.54	84.54	0.43	Positive	2	7175	25625
107	HW_Dougles.d	DBSearch	1-(O-alpha-D-glucopyranosyl)-3-keto-(1,25R)-hexacosanediol		C32 H62 O8	7.876	597.434	574.445	46.48	46.48	-1.41	Positive	2	4288	33741
110	HW_Dougles.d	DBSearch	Arg Arg Gln		C17 H34 N10 O5	7.926	476.307	458.273	75.73	75.73	-4	Positive	3	19783	77893
112	HW_Dougles.d	DBSearch	PE(17:0/0:0)		C22 H46 N O7 P	7.935	485.334	467.3	90.98	90.98	2.31	Positive	3	29656	143964
115	HW_Dougles.d	DBSearch	Apigenin 7-glucuronosyl-(1->2)-glucuronide		C27 H26 O17	8.071	623.123	622.116	95.83	95.83	1.56	Positive	3	23458	116332
116	HW_Dougles.d	DBSearch	Solanocapsine		C27 H46 N2 O2	8.124	453.344	430.354	74.26	74.26	4.12	Positive	2	10943	68747
117	HW_Dougles.d	DBSearch	2-{2-[4[(2-Hydroxy-3-isopropylaminopropoxy)-benzyloxy]ethoxy}-propionic acid		C18 H29 N O6	8.159	373.234	355.2	83.26	83.26	-1.44	Positive	2	19629	72890
120	HW_Dougles.d	DBSearch	Loganin	neuroprotective and anti-inflammatory	C17 H26 O10	8.222	408.186	390.153	82.48	82.48	0.09	Positive	7	12859	110909
121	HW_Dougles.d	DBSearch	Methylorsellinic Acid, Ethyl Ester		C11 H14 O4	8.223	211.096	210.089	86.66	86.66	0.24	Positive	2	61187	207533
122	HW_Dougles.d	DBSearch	Depdecin		C11 H16 O5	8.223	229.107	228.1	85.57	85.57	-1.28	Positive	2	18787	59819
123	HW_Dougles.d	DBSearch	3-(3-Indolyl)-2-oxopropanoic acid		C11 H9 N O3	8.224	445.08	203.059	44.37	44.37	-4.11	Positive	2	3517	29312
130	HW_Dougles.d	DBSearch	PE-Cer(d14:1(4E)/20:0)		C36 H73 N2 O6 P	8.413	683.508	660.519	69.62	69.62	2.54	Positive	3	4393	41998
131	HW_Dougles.d	DBSearch	Megastachine		C20 H29 N O3	8.507	349.247	331.213	40.59	40.59	4.65	Positive	2	2083	15568
135	HW_Dougles.d	DBSearch	PG(O-20:0/18:1(9Z))		C44 H87 O9 P	8.607	396.31	790.605	83.84	83.84	4.34	Positive	3	12480	65612
136	HW_Dougles.d	DBSearch	PE(18:3(9Z,12Z,15Z)/P-18:1(9Z))		C41 H74 N O7 P	8.617	362.769	723.523	59.58	59.58	-3.19	Positive	3	4387	24584
138	HW_Dougles.d	DBSearch	(22E)-(25S)-26,26,26-trifluoro-1α,25-dihydroxy-22,23-didehydrovitamin D3 / (22E)-(25S)-26,26,26-trifluoro-1α,25-dihydroxy-22,23-didehydrocholecalciferol		C27 H39 F3 O3	8.683	486.317	468.283	68.33	68.33	4.61	Positive	2	8942	35529
143	HW_Dougles.d	DBSearch	PS(22:0/22:0)		C50 H98 N O10 P	8.838	452.853	903.69	50.87	50.87	3.34	Positive	2	4960	24299
146	HW_Dougles.d	DBSearch	3-(2,5-Dimethoxyphenyl)propanoic acid		C11 H14 O4	8.91	211.097	210.09	83.47	83.47	-3.89	Positive	2	17611	73064
149	HW_Dougles.d	DBSearch	DAT(18:0/24:0(2Me[S],3OH[S],4Me[S],6Me[S]))		C57 H108 O14	9.026	509.396	1016.78	54.01	54.01	-2.57	Positive	2	2141	8892
151	HW_Dougles.d	DBSearch	GlcCer(d18:0/16:0)		C40 H79 N O8	9.054	724.57	701.58	68.94	68.94	0.71	Positive	2	5353	27146
153	HW_Dougles.d	DBSearch	Calenduloside G methyl ester		C43 H68 O14	9.055	831.452	808.464	49.82	49.82	-3.76	Positive	2	2805	14023
156	HW_Dougles.d	DBSearch	Acacetin 7-glucuronide		C22 H20 O11	9.108	461.108	460.101	47.4	47.4	-0.68	Positive	3	4545	39900
157	HW_Dougles.d	DBSearch	Catechin 5-O-gallate		C22 H18 O10	9.109	443.099	442.091	77.52	77.52	-2.95	Positive	2	7064	27705
158	HW_Dougles.d	DBSearch	4-(2-hydroxypropoxy)-3,5-dimethyl-Phenol		C11 H16 O3	9.113	197.117	196.11	83.69	83.69	0.21	Positive	2	11790	43744
160	HW_Dougles.d	DBSearch	PI(20:0/21:0)		C50 H97 O13 P	9.202	469.339	936.662	79.8	79.8	4.62	Positive	3	8281	46662
161	HW_Dougles.d	DBSearch	PE(18:4(6Z,9Z,12Z,15Z)/22:6(4Z,7Z,10Z,13Z,16Z,19Z))		C45 H70 N O8 P	9.228	401.263	783.485	66.04	66.04	-0.88	Positive	5	6997	51768
162	HW_Dougles.d	DBSearch	N-(3-Oxododecanoyl)homoserine lactone	a pivotal QS molecule, which regulates numerous virulence genes in P. aeruginosa and exhibits broad biological modulation effects in mammalian cells.	C16 H27 N O4	9.233	315.228	297.194	83.91	83.91	-1.26	Positive	2	14446	50047
168	HW_Dougles.d	DBSearch	Halstoctacosanolide A	Antimicrobial metabolite	C48 H76 O12	9.351	423.275	844.527	27.68	27.68	8.55	Positive	3	7234	55933
169	HW_Dougles.d	DBSearch	Ethyl 3-(N-butylacetamido)propionate	Insect repellent	C11 H21 N O3	9.376	216.159	215.152	86.53	86.53	1.4	Positive	2	27585	102288
171	HW_Dougles.d	DBSearch	5''-Phosphoribostamycin		C17 H35 N4 O13 P	9.413	552.227	534.194	77.52	77.52	0.49	Positive	2	10506	47555
172	HW_Dougles.d	DBSearch	Isoeugenitol	traditional medicine as a remedy for colic, flatulence and indigestion	C11 H10 O4	9.421	207.065	206.058	85.37	85.37	-0.2	Positive	2	11915	45399
182	HW_Dougles.d	DBSearch	Artonin K	anti cnacer, lung cancer	C21 H18 O7	9.783	383.113	382.105	75.5	75.5	-0.4	Positive	2	6986	158754
186	HW_Dougles.d	DBSearch	Phytosphingosine		C18 H39 N O3	9.896	356.255	317.292	64.27	64.27	3.44	Positive	2	11025	40144
191	HW_Dougles.d	DBSearch	Ganglioside GM3 (d18:1/16:0)		C57 H104 N2 O21	10.069	577.366	1152.72	48.28	48.28	-3.91	Positive	2	3184	16024
193	HW_Dougles.d	DBSearch	(25S)-3-oxo-12beta-acetoxy-cholest-1,4-dien-26-oic acid		C30 H44 O5	10.094	485.326	484.319	76.46	76.46	0.14	Positive	2	6519	29579
201	HW_Dougles.d	DBSearch	(25R)-5alpha-spirostan-3beta,6alpha,23S-triol 6-O-beta-D-glucopyranoside		C34 H58 O10	10.275	649.391	626.403	68.32	68.32	-0.15	Positive	2	3716	16011
202	HW_Dougles.d	DBSearch	Pristimerol		C30 H42 O4	10.275	467.315	466.308	74.15	74.15	1.04	Positive	2	4919	24466
203	HW_Dougles.d	DBSearch	Liquoric acid	anti microbial, antioxidant, cytotoxic	C30 H44 O5	10.278	485.326	484.319	73.72	73.72	0.13	Positive	2	7597	43523
205	HW_Dougles.d	DBSearch	LysoPE(0:0/22:0)		C27 H56 N O7 P	10.307	555.411	537.377	67.28	67.28	4.32	Positive	2	13130	52869
206	HW_Dougles.d	DBSearch	DL-threo-PDMP		C23 H38 N2 O3	10.575	391.294	390.287	40.66	40.66	4.26	Positive	2	2478	15445
207	HW_Dougles.d	DBSearch	Deoxyloganin		C17 H26 O9	11.048	392.193	374.159	40.46	40.46	-4.42	Positive	2	4850	21149
208	HW_Dougles.d	DBSearch	Granisetron metabolite 4	nausea management	C17 H22 N4 O2	11.057	332.208	314.174	47.17	47.17	1.16	Positive	2	4714	22932
209	HW_Dougles.d	DBSearch	Jasmolone glucoside	Insecticide	C17 H26 O7	11.24	343.176	342.169	80.86	80.86	-2.87	Positive	2	20509	78070
210	HW_Dougles.d	DBSearch	Trp Val Gly		C18 H24 N4 O4	11.242	378.214	360.18	46.79	46.79	-1.48	Positive	2	6016	26183
211	HW_Dougles.d	DBSearch	Val Trp Val		C21 H30 N4 O4	11.421	420.26	402.226	81.12	81.12	0.6	Positive	2	7533	28911
214	HW_Dougles.d	DBSearch	Edulone A		C22 H22 O8	11.702	415.139	414.131	62.43	62.43	0.08	Positive	2	5566	150100
216	HW_Dougles.d	DBSearch	1-NBD-decanoyl-2-decanoyl-sn-Glycerol		C29 H46 N4 O8	11.875	596.364	578.33	71.83	71.83	2.41	Positive	2	5822	23265
217	HW_Dougles.d	DBSearch	NAc-FnorLRF-amide		C32 H46 N8 O5	11.957	640.39	622.356	65.19	65.19	4.21	Positive	2	5559	19989
221	HW_Dougles.d	DBSearch	PI(14:0/20:3(8Z,11Z,14Z))		C43 H77 O13 P	12.223	417.262	832.511	62.25	62.25	-1.13	Positive	2	3267	14649
230	HW_Dougles.d	DBSearch	C16 Sphinganine		C16 H35 N O2	12.794	274.274	273.267	85.05	85.05	-1.74	Positive	2	13502	49369
231	HW_Dougles.d	DBSearch	Phytosphingosine	Anti-aging, hydration	C18 H39 N O3	12.898	318.301	317.293	78.82	78.82	-1.09	Positive	2	9258	34277
233	HW_Dougles.d	DBSearch	2,6-Nonadien-1-ol	flovouring (vege taste)	C9 H16 O	13.336	158.154	140.12	87.1	87.1	2.51	Positive	2	18146	112691
234	HW_Dougles.d	DBSearch	(-)-trans-C75		C14 H22 O4	13.652	255.159	254.152	86.26	86.26	-0.5	Positive	3	11635	60850
235	HW_Dougles.d	DBSearch	(S)-p-Mentha-1,8-dien-10-yl acetate		C12 H18 O2	15.016	195.138	194.131	81	81	-0.5	Positive	2	14540	62253
237	HW_Dougles.d	DBSearch	N-Methyldioctylamine		C17 H37 N	15.089	256.3	255.293	84.46	84.46	-0.84	Positive	2	13612	87802
238	HW_Dougles.d	DBSearch	His Met Lys		C17 H30 N6 O4 S	15.419	415.212	414.205	47.36	47.36	-0.77	Positive	3	5705	26514
241	HW_Dougles.d	DBSearch	Polysorbate 60		C22 H42 O8	18.122	452.322	434.288	81.38	81.38	-0.08	Positive	2	10357	67906
242	HW_Dougles.d	DBSearch	Emmotin A		C16 H22 O4	18.883	279.16	278.153	45.03	45.03	-3.02	Positive	2	6346	28766
244	HW_Dougles.d	DBSearch	Emmotin A	Terpenes	C16 H22 O4	18.974	279.159	278.152	81.05	81.05	-1.26	Positive	5	14079	142599
248	HW_Dougles.d	DBSearch	(25S)-5alpha-cholestan-3beta,6alpha,7beta,8beta,15alpha,16beta,26-heptol		C27 H48 O7	19.463	502.374	484.34	98.61	98.61	-0.41	Positive	3	20592	165189
249	HW_Dougles.d					19.5	458.349	457.341				Positive	2	15292	124232
250	HW_Dougles.d	DBSearch	24-Nor-5β-cholane-3α,7α,12α,22,23-pentol		C23 H40 O5	19.521	397.295	396.288	47.56	47.56	-0.38	Positive	2	2853	18880
251	HW_Dougles.d	DBSearch	N-stearoyl glutamic acid		C23 H43 N O5	19.522	414.321	413.314	76.54	76.54	0.41	Positive	2	9104	70157
253	HW_Dougles.d	DBSearch	Val Trp Val		C21 H30 N4 O4	20.283	403.234	402.226	47.43	47.43	0.66	Positive	2	2511	12853
254	HW_Dougles.d	DBSearch	28:2(5Z,9Z)(6Br)		C28 H51 Br O2	20.609	499.313	498.306	51.93	51.93	3.16	Positive	3	7466	47571
257	HW_Dougles.d	DBSearch	Dihydrostreptomycin 6-phosphate	Anti microbal	C21 H42 N7 O15 P	21.652	702.214	663.248	60.5	60.5	-0.61	Positive	3	2633	33394
259	HW_Dougles.d	DBSearch	1α,25-dihydroxy-3-deoxy-19-nor-22-oxavitamin D3 / 1α,25-dihydroxy-3-deoxy-19-nor-22-oxacholecalciferol	Vitamin D3 deriaratives	C25 H42 O3	22.187	408.348	390.314	81.63	81.63	-1.25	Positive	2	6255	40279
264	HW_Dougles.d	DBSearch	Dihydrotachysterol	treatment for lack of calcium in blood	C28 H46 O	22.194	421.345	398.358	33.08	33.08	-7.51	Positive	2	4026	28407
268	HW_Dougles.d	DBSearch	Camptothecin	Anti cancer	C20 H16 N2 O4	22.588	371.101	348.111	58.54	58.54	-0.96	Positive	2	5924	29199
270	HW_Dougles.d	DBSearch	Hexacosanedioic acid	Breast cancer, colon cancer	C26 H50 O4	22.616	427.378	426.371	68.01	68.01	-0.92	Positive	2	5983	153501
271	HW_Dougles.d	DBSearch	Hexacosanedioic acid	Breast cancer, colon cancer	C26 H50 O4	22.742	449.36	426.371	80.43	80.43	0.75	Positive	2	5864	46376
272	HW_Dougles.d	DBSearch	Ganoderic acid DM	Prostate cancer treatment	C30 H44 O4	22.747	469.331	468.324	72.58	72.58	-0.14	Positive	2	3753	21674
273	HW_Dougles.d	DBSearch	N-stearoyl valine	anti microbial/fats	C23 H45 N O3	22.75	406.328	383.339	45.72	45.72	2.18	Positive	3	4098	31968
274	HW_Dougles.d	DBSearch	Pyrimidifen	Used as insecticide	C20 H28 Cl N3 O2	22.753	395.221	377.186	82.13	82.13	1.65	Positive	4	10123	131698
275	HW_Dougles.d	DBSearch	N-stearoyl valine	Probably anti microbial	C23 H45 N O3	22.833	384.348	383.341	45.39	45.39	-2.37	Positive	2	4035	28892
277	HW_Dougles.d	DBSearch	N-Hexadecanoylpyrrolidine		C20 H39 N O	23.347	310.311	309.303	66.49	66.49	-0.93	Positive	2	8578	83212
279	HW_Dougles.d	DBSearch	Hexacosanedioic acid		C26 H50 O4	23.454	427.378	426.371	69.51	69.51	-0.73	Positive	2	7183	152756
280	HW_Dougles.d	DBSearch	Pipericine		C22 H41 N O	23.764	336.327	335.319	83.24	83.24	-1.62	Positive	2	5313	34064
283	HW_Dougles.d	DBSearch	17,20-dimethyl Prostaglandin F1α		C22 H40 O5	24.914	423.252	384.288	66.87	66.87	-0.51	Positive	3	8568	119647
284	HW_Dougles.d	DBSearch	N-Cyclohexanecarbonylpentadecylamine		C22 H43 N O	25.678	360.324	337.335	84.02	84.02	-0.8	Positive	2	12040	82674
285	HW_Dougles.d	DBSearch	N-Cyclohexanecarbonylpentadecylamine		C22 H43 N O	25.686	338.342	337.335	98.83	98.83	-1.51	Positive	5	205792	2248113
286	HW_Dougles.d	DBSearch	3α,12α-Dihydroxy-5β-chol-8(14)-en-24-oic Acid		C24 H38 O4	25.735	391.285	390.277	82.1	82.1	-1.12	Positive	4	12664	185180
287	HW_Dougles.d	DBSearch	CAY10621		C26 H45 N O4	25.74	436.343	435.335	76.77	76.77	-1.36	Positive	2	8598	78495
288	HW_Dougles.d	DBSearch	Docosanedioic acid		C22 H42 O4	25.868	371.317	370.31	72.03	72.03	-4.65	Positive	4	11777	208569
289	HW_Dougles.d	DBSearch	Tetracosanedioic acid		C24 H46 O4	25.871	416.373	398.339	77.37	77.37	0.23	Positive	2	7063	74909

## Sheet: Table s4
Cpd	File	ID Source	Name		Formula	RT	m/z	Mass	Score	Score (DB)	Diff (DB, ppm)	Polarity	Ions	Height	Vol
1	HW_Dougles.d	DBSearch	1,2-Dihydroxy-3-keto-5-methylthiopentene		C6 H10 O3 S	0.85	185.024	162.034	60.7	60.7	6.56	Positive	2	15202	69660
4	HW_Dougles.d	DBSearch	Dimethyl trisulfide	Fungus growth inhibitions	C2 H6 S3	0.851	143.997	125.963	74.61	74.61	-1.17	Positive	3	136600	594048
9	HW_Dougles.d	DBSearch	1-Isothiocyanato-2-(methylthio)ethane		C4 H7 N S2	0.852	151.035	133.001	52.9	52.9	5.95	Positive	2	34443	173260
16	HW_Dougles.d	DBSearch	Methylselenopyruvate		C4 H6 O3 Se	0.853	214.918	175.955	58.65	58.65	-5.84	Positive	3	158595	629559
23	HW_Dougles.d	DBSearch	(E)-2-Methyl-2-buten-1-ol O-beta-D-Glucopyranoside		C11 H20 O6	0.914	266.159	248.125	80.51	80.51	4.34	Positive	2	39896	131861
25	HW_Dougles.d	DBSearch	Panose		C18 H32 O16	0.941	543.132	504.17	61.09	61.09	-0.83	Positive	2	7902	30326
26	HW_Dougles.d	DBSearch	Licoagroside B		C18 H24 O12	0.941	455.117	432.128	74.96	74.96	-2.33	Positive	2	12685	40906
27	HW_Dougles.d	DBSearch	Theobromine	theobromine is used as a vasodilator, a diuretic, and heart stimulant. And similar to caffeine, it may be useful in management of fatigue and orthostatic hypotensio	C7 H8 N4 O2	0.942	219.028	180.065	85.06	85.06	-2.97	Positive	3	27846	98211
28	HW_Dougles.d	DBSearch	Nigerose (Sakebiose)		C12 H22 O11	0.943	381.08	342.117	94.18	94.18	-3.55	Positive	3	64409	246170
29	HW_Dougles.d	DBSearch	Cyclopenthiazide	High blood pressure, heart failure water retention	C13 H18 Cl N3 O4 S2	0.946	397.077	379.044	55.32	55.32	-3.83	Positive	3	9652	35517
30	HW_Dougles.d	DBSearch	tert-butyl p-(bromomethyl) Benzoate		C12 H15 Br O2	0.948	288.06	270.027	43.81	43.81	-3.75	Positive	2	7219	37262
32	HW_Dougles.d	DBSearch	Nigerose (Sakebiose)		C12 H22 O11	0.952	365.104	342.116	73.11	73.11	1.23	Positive	2	14176	58404
35	HW_Dougles.d	DBSearch	Nigerose (Sakebiose)		C12 H22 O11	0.976	360.151	342.117	81.64	81.64	-1.17	Positive	3	23552	139985
36	HW_Dougles.d	DBSearch	3-Hydroxy-3-methyl-glutaric acid		C6 H10 O5	0.983	180.087	162.052	73.02	73.02	4.39	Positive	5	24978	346667
38	HW_Dougles.d	DBSearch	D-Fructuronic acid		C6 H10 O7	0.987	212.077	194.043	47.29	47.29	-1.32	Positive	2	9707	54640
40	HW_Dougles.d	DBSearch	Galactosylglycerol		C9 H18 O8	0.989	255.107	254.099	46.29	46.29	4.99	Positive	3	6801	42193
42	HW_Dougles.d	DBSearch	2-Hydroxy-3,4-dimethoxybenzoic Acid		C9 H10 O5	0.99	216.087	198.053	73.24	73.24	-1.12	Positive	4	15480	87751
44	HW_Dougles.d	DBSearch	N-(1-Deoxy-1-fructosyl)proline		C11 H19 N O7	1.002	278.124	277.116	84.41	84.41	1.7	Positive	3	41183	211934
45	HW_Dougles.d	DBSearch	Osmaronin		C11 H17 N O6	1.003	260.113	259.105	75.27	75.27	1.39	Positive	2	11750	56380
46	HW_Dougles.d	DBSearch	5'-O-beta-D-Glucosylpyridoxine		C14 H21 N O8	1.012	332.134	331.127	74.28	74.28	-1.55	Positive	2	10053	58090
48	HW_Dougles.d	DBSearch	8-Amino Caprylic acid		C8 H17 N O2	1.042	160.133	159.126	87.68	87.68	0.83	Positive	2	22696	93593
49	HW_Dougles.d	DBSearch	SWEP		C8 H7 Cl2 N O2	1.142	241.975	218.986	49.26	49.26	-3.11	Positive	2	7046	36816
50	HW_Dougles.d	DBSearch	Oxaloglutarate		C7 H8 O7	1.169	222.061	204.027	85.11	85.11	-1.94	Positive	2	13239	93058
51	HW_Dougles.d	DBSearch	(S)-2,3,4,5-Tetrahydropiperidine-2-carboxylate		C6 H9 N O2	1.223	128.071	127.063	69.81	69.81	1.74	Positive	3	10510	76681
52	HW_Dougles.d	DBSearch	Alendronic acid	Osteoporosis	C4 H13 N O7 P2	1.238	287.98	249.018	62.04	62.04	-5.14	Positive	3	12021	88566
53	HW_Dougles.d	DBSearch	Octulose-1,8-bisphosphate		C8 H18 O14 P2	1.243	438.981	400.018	77.7	77.7	-2.57	Positive	3	17408	75641
54	HW_Dougles.d	DBSearch	Aconitic acid		C6 H6 O6	1.243	175.024	174.017	81.33	81.33	-1.85	Positive	2	21168	99816
55	HW_Dougles.d	DBSearch	Citric acid	flaovouring and perservation	C6 H8 O7	1.244	210.061	192.027	80.23	80.23	-1.29	Positive	3	25478	184972
56	HW_Dougles.d	DBSearch	Muconic dialdehyde		C6 H6 O2	1.672	128.071	110.037	47.35	47.35	-1.78	Positive	2	18918	88201
57	HW_Dougles.d	DBSearch	Hypoglycin	cause vomitting, food poisoning	C7 H11 N O2	1.74	159.112	141.078	46.2	46.2	3.44	Positive	2	10890	102514
58	HW_Dougles.d	DBSearch	2-Acetyl-1-ethylpyrrole		C8 H11 N O	1.901	138.091	137.084	87.3	87.3	0.42	Positive	2	15127	59858
59	HW_Dougles.d					2.249	439.054	438.046				Positive	2	12062	56191
60	HW_Dougles.d	DBSearch	Phosphocreatine		C4 H10 N3 O5 P	2.252	423.081	211.038	32.13	32.13	-9.46	Positive	2	1754	12947
63	HW_Dougles.d	DBSearch	Pirbuterol	relieve cough, wheezing, shortness of breath, and troubled breathing by increasing the flow of air through the bronchial tubes	C12 H20 N2 O3	2.797	258.182	240.148	79.82	79.82	-2.51	Positive	3	21636	148093
64	HW_Dougles.d	DBSearch	Val Leu		C11 H22 N2 O3	3.17	231.17	230.163	85.92	85.92	-0.43	Positive	2	24762	160762
65	HW_Dougles.d	DBSearch	Vernolepin	Anti tumor	C15 H16 O5	3.336	294.134	276.1	85.93	85.93	-0.14	Positive	2	17127	98876
66	HW_Dougles.d	DBSearch	Ammodendrine		C12 H20 N2 O	3.363	226.192	208.158	85.59	85.59	-1.85	Positive	2	28389	218033
67	HW_Dougles.d	DBSearch	Leucyl-Hydroxyproline		C11 H20 N2 O4	3.459	245.15	244.143	85.42	85.42	-1.4	Positive	2	7311	42331
71	HW_Dougles.d	DBSearch	3-Hydroxymonoethylglycylxylidide (3-Hydroxy-MEGX)		C12 H18 N2 O2	5.968	240.171	222.137	83.13	83.13	-1.21	Positive	2	11667	50871
74	HW_Dougles.d	DBSearch	2,5-Dimethoxycinnamic acid		C11 H12 O4	6.459	209.081	208.074	86.18	86.18	-0.66	Positive	2	14441	58837
75	HW_Dougles.d	DBSearch	N-Succinyl-2-amino-6-ketopimelate		C11 H15 N O8	6.461	312.069	289.079	47.28	47.28	1.06	Positive	2	2072	12280
76	HW_Dougles.d	DBSearch	Zizybeoside I		C19 H28 O11	6.493	450.197	432.163	80.54	80.54	-0.52	Positive	2	12573	45558
77	HW_Dougles.d	DBSearch	Val Ile Leu		C17 H33 N3 O4	6.604	344.255	343.248	84.78	84.78	-1.39	Positive	3	39663	175994
79	HW_Dougles.d	DBSearch	2,5-Dimethoxycinnamic acid		C11 H12 O4	6.645	209.081	208.074	86.59	86.59	-0.24	Positive	2	62941	236396
81	HW_Dougles.d	DBSearch	Perindoprilat	Hypertension activities	C17 H28 N2 O5	6.73	358.234	340.2	83.62	83.62	-1.31	Positive	2	19306	73941
83	HW_Dougles.d	DBSearch	W123		C17 H26 N2 O3	6.894	324.228	306.195	83.21	83.21	-1.11	Positive	2	20988	80215
84	HW_Dougles.d	DBSearch	Pro Gln Pro		C15 H24 N4 O5	6.928	358.207	340.173	41	41	4.44	Positive	2	6867	20958
85	HW_Dougles.d	DBSearch	8Z-Decene-4,6-diynoic acid		C10 H10 O2	7.028	163.075	162.068	79.53	79.53	2.43	Positive	2	18557	62966
89	HW_Dougles.d	DBSearch	2-Phenylethyl 3-methylbutanoate		C13 H18 O2	7.292	207.138	206.131	85.77	85.77	0.38	Positive	2	19736	71626
92	HW_Dougles.d	DBSearch	Crosatoside B		C20 H30 O11	7.386	464.212	446.179	78.11	78.11	0.27	Positive	2	8566	31918
93	HW_Dougles.d	DBSearch	(R)-Roscovitine	treat cancers, neurodegenerative diseases, inflammation, viral infections, polycystic kidney disease and glomerulonephritis.	C19 H26 N6 O	7.452	372.25	354.216	84.72	84.72	1.05	Positive	2	7579	28624
96	HW_Dougles.d	DBSearch	Phlorisobutyrophenone		C10 H12 O4	7.541	197.081	196.073	86.06	86.06	1.76	Positive	2	25967	82869
97	HW_Dougles.d	DBSearch	Funtumine	induce cell Death in cancer cells	C21 H35 N O	7.557	340.26	317.271	80.5	80.5	2.91	Positive	2	8610	29161
98	HW_Dougles.d	DBSearch	PE(16:0/0:0)		C21 H44 N O7 P	7.607	471.319	453.285	75.27	75.27	1.3	Positive	2	8377	35224
101	HW_Dougles.d	DBSearch	Acebutolol	High blood pressure treatment	C18 H28 N2 O4	7.696	354.24	336.205	67.31	67.31	-1.9	Positive	2	4792	24710
102	HW_Dougles.d	DBSearch	8Z-Decene-4,6-diynoic acid		C10 H10 O2	7.713	163.076	162.068	87.14	87.14	-0.82	Positive	2	10853	33092
103	HW_Dougles.d	DBSearch	Palmitoyl Serotonin		C26 H42 N2 O2	7.716	437.312	414.323	74.97	74.97	4.03	Positive	2	13174	51490
105	HW_Dougles.d	DBSearch	17beta-Amino-5alpha-androstan-11beta-ol		C19 H33 N O	7.783	314.245	291.256	84.54	84.54	0.43	Positive	2	7175	25625
107	HW_Dougles.d	DBSearch	1-(O-alpha-D-glucopyranosyl)-3-keto-(1,25R)-hexacosanediol		C32 H62 O8	7.876	597.434	574.445	46.48	46.48	-1.41	Positive	2	4288	33741
110	HW_Dougles.d	DBSearch	Arg Arg Gln		C17 H34 N10 O5	7.926	476.307	458.273	75.73	75.73	-4	Positive	3	19783	77893
112	HW_Dougles.d	DBSearch	PE(17:0/0:0)		C22 H46 N O7 P	7.935	485.334	467.3	90.98	90.98	2.31	Positive	3	29656	143964
115	HW_Dougles.d	DBSearch	Apigenin 7-glucuronosyl-(1->2)-glucuronide		C27 H26 O17	8.071	623.123	622.116	95.83	95.83	1.56	Positive	3	23458	116332
116	HW_Dougles.d	DBSearch	Solanocapsine		C27 H46 N2 O2	8.124	453.344	430.354	74.26	74.26	4.12	Positive	2	10943	68747
117	HW_Dougles.d	DBSearch	2-{2-[4[(2-Hydroxy-3-isopropylaminopropoxy)-benzyloxy]ethoxy}-propionic acid		C18 H29 N O6	8.159	373.234	355.2	83.26	83.26	-1.44	Positive	2	19629	72890
120	HW_Dougles.d	DBSearch	Loganin	neuroprotective and anti-inflammatory	C17 H26 O10	8.222	408.186	390.153	82.48	82.48	0.09	Positive	7	12859	110909
121	HW_Dougles.d	DBSearch	Methylorsellinic Acid, Ethyl Ester		C11 H14 O4	8.223	211.096	210.089	86.66	86.66	0.24	Positive	2	61187	207533
122	HW_Dougles.d	DBSearch	Depdecin		C11 H16 O5	8.223	229.107	228.1	85.57	85.57	-1.28	Positive	2	18787	59819
123	HW_Dougles.d	DBSearch	3-(3-Indolyl)-2-oxopropanoic acid		C11 H9 N O3	8.224	445.08	203.059	44.37	44.37	-4.11	Positive	2	3517	29312
130	HW_Dougles.d	DBSearch	PE-Cer(d14:1(4E)/20:0)		C36 H73 N2 O6 P	8.413	683.508	660.519	69.62	69.62	2.54	Positive	3	4393	41998
131	HW_Dougles.d	DBSearch	Megastachine		C20 H29 N O3	8.507	349.247	331.213	40.59	40.59	4.65	Positive	2	2083	15568
135	HW_Dougles.d	DBSearch	PG(O-20:0/18:1(9Z))		C44 H87 O9 P	8.607	396.31	790.605	83.84	83.84	4.34	Positive	3	12480	65612
136	HW_Dougles.d	DBSearch	PE(18:3(9Z,12Z,15Z)/P-18:1(9Z))		C41 H74 N O7 P	8.617	362.769	723.523	59.58	59.58	-3.19	Positive	3	4387	24584
138	HW_Dougles.d	DBSearch	(22E)-(25S)-26,26,26-trifluoro-1α,25-dihydroxy-22,23-didehydrovitamin D3 / (22E)-(25S)-26,26,26-trifluoro-1α,25-dihydroxy-22,23-didehydrocholecalciferol		C27 H39 F3 O3	8.683	486.317	468.283	68.33	68.33	4.61	Positive	2	8942	35529
143	HW_Dougles.d	DBSearch	PS(22:0/22:0)		C50 H98 N O10 P	8.838	452.853	903.69	50.87	50.87	3.34	Positive	2	4960	24299
146	HW_Dougles.d	DBSearch	3-(2,5-Dimethoxyphenyl)propanoic acid		C11 H14 O4	8.91	211.097	210.09	83.47	83.47	-3.89	Positive	2	17611	73064
149	HW_Dougles.d	DBSearch	DAT(18:0/24:0(2Me[S],3OH[S],4Me[S],6Me[S]))		C57 H108 O14	9.026	509.396	1016.78	54.01	54.01	-2.57	Positive	2	2141	8892
151	HW_Dougles.d	DBSearch	GlcCer(d18:0/16:0)		C40 H79 N O8	9.054	724.57	701.58	68.94	68.94	0.71	Positive	2	5353	27146
153	HW_Dougles.d	DBSearch	Calenduloside G methyl ester		C43 H68 O14	9.055	831.452	808.464	49.82	49.82	-3.76	Positive	2	2805	14023
156	HW_Dougles.d	DBSearch	Acacetin 7-glucuronide		C22 H20 O11	9.108	461.108	460.101	47.4	47.4	-0.68	Positive	3	4545	39900
157	HW_Dougles.d	DBSearch	Catechin 5-O-gallate		C22 H18 O10	9.109	443.099	442.091	77.52	77.52	-2.95	Positive	2	7064	27705
158	HW_Dougles.d	DBSearch	4-(2-hydroxypropoxy)-3,5-dimethyl-Phenol		C11 H16 O3	9.113	197.117	196.11	83.69	83.69	0.21	Positive	2	11790	43744
160	HW_Dougles.d	DBSearch	PI(20:0/21:0)		C50 H97 O13 P	9.202	469.339	936.662	79.8	79.8	4.62	Positive	3	8281	46662
161	HW_Dougles.d	DBSearch	PE(18:4(6Z,9Z,12Z,15Z)/22:6(4Z,7Z,10Z,13Z,16Z,19Z))		C45 H70 N O8 P	9.228	401.263	783.485	66.04	66.04	-0.88	Positive	5	6997	51768
162	HW_Dougles.d	DBSearch	N-(3-Oxododecanoyl)homoserine lactone	a pivotal QS molecule, which regulates numerous virulence genes in P. aeruginosa and exhibits broad biological modulation effects in mammalian cells.	C16 H27 N O4	9.233	315.228	297.194	83.91	83.91	-1.26	Positive	2	14446	50047
168	HW_Dougles.d	DBSearch	Halstoctacosanolide A	Antimicrobial metabolite	C48 H76 O12	9.351	423.275	844.527	27.68	27.68	8.55	Positive	3	7234	55933
169	HW_Dougles.d	DBSearch	Ethyl 3-(N-butylacetamido)propionate	Insect repellent	C11 H21 N O3	9.376	216.159	215.152	86.53	86.53	1.4	Positive	2	27585	102288
171	HW_Dougles.d	DBSearch	5''-Phosphoribostamycin		C17 H35 N4 O13 P	9.413	552.227	534.194	77.52	77.52	0.49	Positive	2	10506	47555
172	HW_Dougles.d	DBSearch	Isoeugenitol	traditional medicine as a remedy for colic, flatulence and indigestion	C11 H10 O4	9.421	207.065	206.058	85.37	85.37	-0.2	Positive	2	11915	45399
182	HW_Dougles.d	DBSearch	Artonin K	anti cnacer, lung cancer	C21 H18 O7	9.783	383.113	382.105	75.5	75.5	-0.4	Positive	2	6986	158754
186	HW_Dougles.d	DBSearch	Phytosphingosine		C18 H39 N O3	9.896	356.255	317.292	64.27	64.27	3.44	Positive	2	11025	40144
191	HW_Dougles.d	DBSearch	Ganglioside GM3 (d18:1/16:0)		C57 H104 N2 O21	10.069	577.366	1152.72	48.28	48.28	-3.91	Positive	2	3184	16024
193	HW_Dougles.d	DBSearch	(25S)-3-oxo-12beta-acetoxy-cholest-1,4-dien-26-oic acid		C30 H44 O5	10.094	485.326	484.319	76.46	76.46	0.14	Positive	2	6519	29579
201	HW_Dougles.d	DBSearch	(25R)-5alpha-spirostan-3beta,6alpha,23S-triol 6-O-beta-D-glucopyranoside		C34 H58 O10	10.275	649.391	626.403	68.32	68.32	-0.15	Positive	2	3716	16011
202	HW_Dougles.d	DBSearch	Pristimerol		C30 H42 O4	10.275	467.315	466.308	74.15	74.15	1.04	Positive	2	4919	24466
203	HW_Dougles.d	DBSearch	Liquoric acid	anti microbial, antioxidant, cytotoxic	C30 H44 O5	10.278	485.326	484.319	73.72	73.72	0.13	Positive	2	7597	43523
205	HW_Dougles.d	DBSearch	LysoPE(0:0/22:0)		C27 H56 N O7 P	10.307	555.411	537.377	67.28	67.28	4.32	Positive	2	13130	52869
206	HW_Dougles.d	DBSearch	DL-threo-PDMP		C23 H38 N2 O3	10.575	391.294	390.287	40.66	40.66	4.26	Positive	2	2478	15445
207	HW_Dougles.d	DBSearch	Deoxyloganin		C17 H26 O9	11.048	392.193	374.159	40.46	40.46	-4.42	Positive	2	4850	21149
208	HW_Dougles.d	DBSearch	Granisetron metabolite 4	nausea management	C17 H22 N4 O2	11.057	332.208	314.174	47.17	47.17	1.16	Positive	2	4714	22932
209	HW_Dougles.d	DBSearch	Jasmolone glucoside	Insecticide	C17 H26 O7	11.24	343.176	342.169	80.86	80.86	-2.87	Positive	2	20509	78070
210	HW_Dougles.d	DBSearch	Trp Val Gly		C18 H24 N4 O4	11.242	378.214	360.18	46.79	46.79	-1.48	Positive	2	6016	26183
211	HW_Dougles.d	DBSearch	Val Trp Val		C21 H30 N4 O4	11.421	420.26	402.226	81.12	81.12	0.6	Positive	2	7533	28911
214	HW_Dougles.d	DBSearch	Edulone A		C22 H22 O8	11.702	415.139	414.131	62.43	62.43	0.08	Positive	2	5566	150100
216	HW_Dougles.d	DBSearch	1-NBD-decanoyl-2-decanoyl-sn-Glycerol		C29 H46 N4 O8	11.875	596.364	578.33	71.83	71.83	2.41	Positive	2	5822	23265
217	HW_Dougles.d	DBSearch	NAc-FnorLRF-amide		C32 H46 N8 O5	11.957	640.39	622.356	65.19	65.19	4.21	Positive	2	5559	19989
221	HW_Dougles.d	DBSearch	PI(14:0/20:3(8Z,11Z,14Z))		C43 H77 O13 P	12.223	417.262	832.511	62.25	62.25	-1.13	Positive	2	3267	14649
230	HW_Dougles.d	DBSearch	C16 Sphinganine		C16 H35 N O2	12.794	274.274	273.267	85.05	85.05	-1.74	Positive	2	13502	49369
231	HW_Dougles.d	DBSearch	Phytosphingosine	Anti-aging, hydration	C18 H39 N O3	12.898	318.301	317.293	78.82	78.82	-1.09	Positive	2	9258	34277
233	HW_Dougles.d	DBSearch	2,6-Nonadien-1-ol	flovouring (vege taste)	C9 H16 O	13.336	158.154	140.12	87.1	87.1	2.51	Positive	2	18146	112691
234	HW_Dougles.d	DBSearch	(-)-trans-C75		C14 H22 O4	13.652	255.159	254.152	86.26	86.26	-0.5	Positive	3	11635	60850
235	HW_Dougles.d	DBSearch	(S)-p-Mentha-1,8-dien-10-yl acetate		C12 H18 O2	15.016	195.138	194.131	81	81	-0.5	Positive	2	14540	62253
237	HW_Dougles.d	DBSearch	N-Methyldioctylamine		C17 H37 N	15.089	256.3	255.293	84.46	84.46	-0.84	Positive	2	13612	87802
238	HW_Dougles.d	DBSearch	His Met Lys		C17 H30 N6 O4 S	15.419	415.212	414.205	47.36	47.36	-0.77	Positive	3	5705	26514
241	HW_Dougles.d	DBSearch	Polysorbate 60		C22 H42 O8	18.122	452.322	434.288	81.38	81.38	-0.08	Positive	2	10357	67906
242	HW_Dougles.d	DBSearch	Emmotin A		C16 H22 O4	18.883	279.16	278.153	45.03	45.03	-3.02	Positive	2	6346	28766
244	HW_Dougles.d	DBSearch	Emmotin A	Terpenes	C16 H22 O4	18.974	279.159	278.152	81.05	81.05	-1.26	Positive	5	14079	142599
248	HW_Dougles.d	DBSearch	(25S)-5alpha-cholestan-3beta,6alpha,7beta,8beta,15alpha,16beta,26-heptol		C27 H48 O7	19.463	502.374	484.34	98.61	98.61	-0.41	Positive	3	20592	165189
249	HW_Dougles.d					19.5	458.349	457.341				Positive	2	15292	124232
250	HW_Dougles.d	DBSearch	24-Nor-5β-cholane-3α,7α,12α,22,23-pentol		C23 H40 O5	19.521	397.295	396.288	47.56	47.56	-0.38	Positive	2	2853	18880
251	HW_Dougles.d	DBSearch	N-stearoyl glutamic acid		C23 H43 N O5	19.522	414.321	413.314	76.54	76.54	0.41	Positive	2	9104	70157
253	HW_Dougles.d	DBSearch	Val Trp Val		C21 H30 N4 O4	20.283	403.234	402.226	47.43	47.43	0.66	Positive	2	2511	12853
254	HW_Dougles.d	DBSearch	28:2(5Z,9Z)(6Br)		C28 H51 Br O2	20.609	499.313	498.306	51.93	51.93	3.16	Positive	3	7466	47571
257	HW_Dougles.d	DBSearch	Dihydrostreptomycin 6-phosphate	Anti microbal	C21 H42 N7 O15 P	21.652	702.214	663.248	60.5	60.5	-0.61	Positive	3	2633	33394
259	HW_Dougles.d	DBSearch	1α,25-dihydroxy-3-deoxy-19-nor-22-oxavitamin D3 / 1α,25-dihydroxy-3-deoxy-19-nor-22-oxacholecalciferol	Vitamin D3 deriaratives	C25 H42 O3	22.187	408.348	390.314	81.63	81.63	-1.25	Positive	2	6255	40279
264	HW_Dougles.d	DBSearch	Dihydrotachysterol	treatment for lack of calcium in blood	C28 H46 O	22.194	421.345	398.358	33.08	33.08	-7.51	Positive	2	4026	28407
268	HW_Dougles.d	DBSearch	Camptothecin	Anti cancer	C20 H16 N2 O4	22.588	371.101	348.111	58.54	58.54	-0.96	Positive	2	5924	29199
270	HW_Dougles.d	DBSearch	Hexacosanedioic acid	Breast cancer, colon cancer	C26 H50 O4	22.616	427.378	426.371	68.01	68.01	-0.92	Positive	2	5983	153501
271	HW_Dougles.d	DBSearch	Hexacosanedioic acid	Breast cancer, colon cancer	C26 H50 O4	22.742	449.36	426.371	80.43	80.43	0.75	Positive	2	5864	46376
272	HW_Dougles.d	DBSearch	Ganoderic acid DM	Prostate cancer treatment	C30 H44 O4	22.747	469.331	468.324	72.58	72.58	-0.14	Positive	2	3753	21674
273	HW_Dougles.d	DBSearch	N-stearoyl valine	anti microbial/fats	C23 H45 N O3	22.75	406.328	383.339	45.72	45.72	2.18	Positive	3	4098	31968
274	HW_Dougles.d	DBSearch	Pyrimidifen	Used as insecticide	C20 H28 Cl N3 O2	22.753	395.221	377.186	82.13	82.13	1.65	Positive	4	10123	131698
275	HW_Dougles.d	DBSearch	N-stearoyl valine	Probably anti microbial	C23 H45 N O3	22.833	384.348	383.341	45.39	45.39	-2.37	Positive	2	4035	28892
277	HW_Dougles.d	DBSearch	N-Hexadecanoylpyrrolidine		C20 H39 N O	23.347	310.311	309.303	66.49	66.49	-0.93	Positive	2	8578	83212
279	HW_Dougles.d	DBSearch	Hexacosanedioic acid		C26 H50 O4	23.454	427.378	426.371	69.51	69.51	-0.73	Positive	2	7183	152756
280	HW_Dougles.d	DBSearch	Pipericine		C22 H41 N O	23.764	336.327	335.319	83.24	83.24	-1.62	Positive	2	5313	34064
283	HW_Dougles.d	DBSearch	17,20-dimethyl Prostaglandin F1α		C22 H40 O5	24.914	423.252	384.288	66.87	66.87	-0.51	Positive	3	8568	119647
284	HW_Dougles.d	DBSearch	N-Cyclohexanecarbonylpentadecylamine		C22 H43 N O	25.678	360.324	337.335	84.02	84.02	-0.8	Positive	2	12040	82674
285	HW_Dougles.d	DBSearch	N-Cyclohexanecarbonylpentadecylamine		C22 H43 N O	25.686	338.342	337.335	98.83	98.83	-1.51	Positive	5	205792	2248113
286	HW_Dougles.d	DBSearch	3α,12α-Dihydroxy-5β-chol-8(14)-en-24-oic Acid		C24 H38 O4	25.735	391.285	390.277	82.1	82.1	-1.12	Positive	4	12664	185180
287	HW_Dougles.d	DBSearch	CAY10621		C26 H45 N O4	25.74	436.343	435.335	76.77	76.77	-1.36	Positive	2	8598	78495
288	HW_Dougles.d	DBSearch	Docosanedioic acid		C22 H42 O4	25.868	371.317	370.31	72.03	72.03	-4.65	Positive	4	11777	208569
289	HW_Dougles.d	DBSearch	Tetracosanedioic acid		C24 H46 O4	25.871	416.373	398.339	77.37	77.37	0.23	Positive	2	7063	74909

## Sheet: Table s5
Cpd	File	ID Source	Name		Formula	RT	m/z	Mass	Score	Score (DB)	Diff (DB, ppm)	Polarity	Ions	Height	Vol
1	HW_Dougles.d	DBSearch	1,2-Dihydroxy-3-keto-5-methylthiopentene		C6 H10 O3 S	0.85	185.024	162.034	60.7	60.7	6.56	Positive	2	15202	69660
4	HW_Dougles.d	DBSearch	Dimethyl trisulfide	Fungus growth inhibitions	C2 H6 S3	0.851	143.997	125.963	74.61	74.61	-1.17	Positive	3	136600	594048
9	HW_Dougles.d	DBSearch	1-Isothiocyanato-2-(methylthio)ethane		C4 H7 N S2	0.852	151.035	133.001	52.9	52.9	5.95	Positive	2	34443	173260
16	HW_Dougles.d	DBSearch	Methylselenopyruvate		C4 H6 O3 Se	0.853	214.918	175.955	58.65	58.65	-5.84	Positive	3	158595	629559
23	HW_Dougles.d	DBSearch	(E)-2-Methyl-2-buten-1-ol O-beta-D-Glucopyranoside		C11 H20 O6	0.914	266.159	248.125	80.51	80.51	4.34	Positive	2	39896	131861
25	HW_Dougles.d	DBSearch	Panose		C18 H32 O16	0.941	543.132	504.17	61.09	61.09	-0.83	Positive	2	7902	30326
26	HW_Dougles.d	DBSearch	Licoagroside B		C18 H24 O12	0.941	455.117	432.128	74.96	74.96	-2.33	Positive	2	12685	40906
27	HW_Dougles.d	DBSearch	Theobromine	theobromine is used as a vasodilator, a diuretic, and heart stimulant. And similar to caffeine, it may be useful in management of fatigue and orthostatic hypotensio	C7 H8 N4 O2	0.942	219.028	180.065	85.06	85.06	-2.97	Positive	3	27846	98211
28	HW_Dougles.d	DBSearch	Nigerose (Sakebiose)		C12 H22 O11	0.943	381.08	342.117	94.18	94.18	-3.55	Positive	3	64409	246170
29	HW_Dougles.d	DBSearch	Cyclopenthiazide	High blood pressure, heart failure water retention	C13 H18 Cl N3 O4 S2	0.946	397.077	379.044	55.32	55.32	-3.83	Positive	3	9652	35517
30	HW_Dougles.d	DBSearch	tert-butyl p-(bromomethyl) Benzoate		C12 H15 Br O2	0.948	288.06	270.027	43.81	43.81	-3.75	Positive	2	7219	37262
36	HW_Dougles.d	DBSearch	3-Hydroxy-3-methyl-glutaric acid		C6 H10 O5	0.983	180.087	162.052	73.02	73.02	4.39	Positive	5	24978	346667
38	HW_Dougles.d	DBSearch	D-Fructuronic acid		C6 H10 O7	0.987	212.077	194.043	47.29	47.29	-1.32	Positive	2	9707	54640
40	HW_Dougles.d	DBSearch	Galactosylglycerol		C9 H18 O8	0.989	255.107	254.099	46.29	46.29	4.99	Positive	3	6801	42193
42	HW_Dougles.d	DBSearch	2-Hydroxy-3,4-dimethoxybenzoic Acid		C9 H10 O5	0.99	216.087	198.053	73.24	73.24	-1.12	Positive	4	15480	87751
44	HW_Dougles.d	DBSearch	N-(1-Deoxy-1-fructosyl)proline		C11 H19 N O7	1.002	278.124	277.116	84.41	84.41	1.7	Positive	3	41183	211934
45	HW_Dougles.d	DBSearch	Osmaronin		C11 H17 N O6	1.003	260.113	259.105	75.27	75.27	1.39	Positive	2	11750	56380
46	HW_Dougles.d	DBSearch	5'-O-beta-D-Glucosylpyridoxine		C14 H21 N O8	1.012	332.134	331.127	74.28	74.28	-1.55	Positive	2	10053	58090
48	HW_Dougles.d	DBSearch	8-Amino Caprylic acid		C8 H17 N O2	1.042	160.133	159.126	87.68	87.68	0.83	Positive	2	22696	93593
49	HW_Dougles.d	DBSearch	SWEP		C8 H7 Cl2 N O2	1.142	241.975	218.986	49.26	49.26	-3.11	Positive	2	7046	36816
50	HW_Dougles.d	DBSearch	Oxaloglutarate		C7 H8 O7	1.169	222.061	204.027	85.11	85.11	-1.94	Positive	2	13239	93058
51	HW_Dougles.d	DBSearch	(S)-2,3,4,5-Tetrahydropiperidine-2-carboxylate		C6 H9 N O2	1.223	128.071	127.063	69.81	69.81	1.74	Positive	3	10510	76681
52	HW_Dougles.d	DBSearch	Alendronic acid	Osteoporosis	C4 H13 N O7 P2	1.238	287.98	249.018	62.04	62.04	-5.14	Positive	3	12021	88566
53	HW_Dougles.d	DBSearch	Octulose-1,8-bisphosphate		C8 H18 O14 P2	1.243	438.981	400.018	77.7	77.7	-2.57	Positive	3	17408	75641
54	HW_Dougles.d	DBSearch	Aconitic acid		C6 H6 O6	1.243	175.024	174.017	81.33	81.33	-1.85	Positive	2	21168	99816
55	HW_Dougles.d	DBSearch	Citric acid	flaovouring and perservation	C6 H8 O7	1.244	210.061	192.027	80.23	80.23	-1.29	Positive	3	25478	184972
56	HW_Dougles.d	DBSearch	Muconic dialdehyde		C6 H6 O2	1.672	128.071	110.037	47.35	47.35	-1.78	Positive	2	18918	88201
57	HW_Dougles.d	DBSearch	Hypoglycin	cause vomitting, food poisoning	C7 H11 N O2	1.74	159.112	141.078	46.2	46.2	3.44	Positive	2	10890	102514
58	HW_Dougles.d	DBSearch	2-Acetyl-1-ethylpyrrole		C8 H11 N O	1.901	138.091	137.084	87.3	87.3	0.42	Positive	2	15127	59858
59	HW_Dougles.d					2.249	439.054	438.046				Positive	2	12062	56191
60	HW_Dougles.d	DBSearch	Phosphocreatine		C4 H10 N3 O5 P	2.252	423.081	211.038	32.13	32.13	-9.46	Positive	2	1754	12947
63	HW_Dougles.d	DBSearch	Pirbuterol	relieve cough, wheezing, shortness of breath, and troubled breathing by increasing the flow of air through the bronchial tubes	C12 H20 N2 O3	2.797	258.182	240.148	79.82	79.82	-2.51	Positive	3	21636	148093
64	HW_Dougles.d	DBSearch	Val Leu		C11 H22 N2 O3	3.17	231.17	230.163	85.92	85.92	-0.43	Positive	2	24762	160762
65	HW_Dougles.d	DBSearch	Vernolepin	Anti tumor	C15 H16 O5	3.336	294.134	276.1	85.93	85.93	-0.14	Positive	2	17127	98876
66	HW_Dougles.d	DBSearch	Ammodendrine		C12 H20 N2 O	3.363	226.192	208.158	85.59	85.59	-1.85	Positive	2	28389	218033
67	HW_Dougles.d	DBSearch	Leucyl-Hydroxyproline		C11 H20 N2 O4	3.459	245.15	244.143	85.42	85.42	-1.4	Positive	2	7311	42331
71	HW_Dougles.d	DBSearch	3-Hydroxymonoethylglycylxylidide (3-Hydroxy-MEGX)		C12 H18 N2 O2	5.968	240.171	222.137	83.13	83.13	-1.21	Positive	2	11667	50871
74	HW_Dougles.d	DBSearch	2,5-Dimethoxycinnamic acid		C11 H12 O4	6.459	209.081	208.074	86.18	86.18	-0.66	Positive	2	14441	58837
75	HW_Dougles.d	DBSearch	N-Succinyl-2-amino-6-ketopimelate		C11 H15 N O8	6.461	312.069	289.079	47.28	47.28	1.06	Positive	2	2072	12280
76	HW_Dougles.d	DBSearch	Zizybeoside I		C19 H28 O11	6.493	450.197	432.163	80.54	80.54	-0.52	Positive	2	12573	45558
77	HW_Dougles.d	DBSearch	Val Ile Leu		C17 H33 N3 O4	6.604	344.255	343.248	84.78	84.78	-1.39	Positive	3	39663	175994
81	HW_Dougles.d	DBSearch	Perindoprilat	Hypertension activities	C17 H28 N2 O5	6.73	358.234	340.2	83.62	83.62	-1.31	Positive	2	19306	73941
83	HW_Dougles.d	DBSearch	W123		C17 H26 N2 O3	6.894	324.228	306.195	83.21	83.21	-1.11	Positive	2	20988	80215
84	HW_Dougles.d	DBSearch	Pro Gln Pro		C15 H24 N4 O5	6.928	358.207	340.173	41	41	4.44	Positive	2	6867	20958
89	HW_Dougles.d	DBSearch	2-Phenylethyl 3-methylbutanoate		C13 H18 O2	7.292	207.138	206.131	85.77	85.77	0.38	Positive	2	19736	71626
92	HW_Dougles.d	DBSearch	Crosatoside B		C20 H30 O11	7.386	464.212	446.179	78.11	78.11	0.27	Positive	2	8566	31918
93	HW_Dougles.d	DBSearch	(R)-Roscovitine	treat cancers, neurodegenerative diseases, inflammation, viral infections, polycystic kidney disease and glomerulonephritis.	C19 H26 N6 O	7.452	372.25	354.216	84.72	84.72	1.05	Positive	2	7579	28624
96	HW_Dougles.d	DBSearch	Phlorisobutyrophenone		C10 H12 O4	7.541	197.081	196.073	86.06	86.06	1.76	Positive	2	25967	82869
97	HW_Dougles.d	DBSearch	Funtumine	induce cell Death in cancer cells	C21 H35 N O	7.557	340.26	317.271	80.5	80.5	2.91	Positive	2	8610	29161
98	HW_Dougles.d	DBSearch	PE(16:0/0:0)		C21 H44 N O7 P	7.607	471.319	453.285	75.27	75.27	1.3	Positive	2	8377	35224
101	HW_Dougles.d	DBSearch	Acebutolol	High blood pressure treatment	C18 H28 N2 O4	7.696	354.24	336.205	67.31	67.31	-1.9	Positive	2	4792	24710
102	HW_Dougles.d	DBSearch	8Z-Decene-4,6-diynoic acid		C10 H10 O2	7.713	163.076	162.068	87.14	87.14	-0.82	Positive	2	10853	33092
103	HW_Dougles.d	DBSearch	Palmitoyl Serotonin		C26 H42 N2 O2	7.716	437.312	414.323	74.97	74.97	4.03	Positive	2	13174	51490
105	HW_Dougles.d	DBSearch	17beta-Amino-5alpha-androstan-11beta-ol		C19 H33 N O	7.783	314.245	291.256	84.54	84.54	0.43	Positive	2	7175	25625
107	HW_Dougles.d	DBSearch	1-(O-alpha-D-glucopyranosyl)-3-keto-(1,25R)-hexacosanediol		C32 H62 O8	7.876	597.434	574.445	46.48	46.48	-1.41	Positive	2	4288	33741
110	HW_Dougles.d	DBSearch	Arg Arg Gln		C17 H34 N10 O5	7.926	476.307	458.273	75.73	75.73	-4	Positive	3	19783	77893
112	HW_Dougles.d	DBSearch	PE(17:0/0:0)		C22 H46 N O7 P	7.935	485.334	467.3	90.98	90.98	2.31	Positive	3	29656	143964
115	HW_Dougles.d	DBSearch	Apigenin 7-glucuronosyl-(1->2)-glucuronide		C27 H26 O17	8.071	623.123	622.116	95.83	95.83	1.56	Positive	3	23458	116332
116	HW_Dougles.d	DBSearch	Solanocapsine		C27 H46 N2 O2	8.124	453.344	430.354	74.26	74.26	4.12	Positive	2	10943	68747
117	HW_Dougles.d	DBSearch	2-{2-[4[(2-Hydroxy-3-isopropylaminopropoxy)-benzyloxy]ethoxy}-propionic acid		C18 H29 N O6	8.159	373.234	355.2	83.26	83.26	-1.44	Positive	2	19629	72890
120	HW_Dougles.d	DBSearch	Loganin	neuroprotective and anti-inflammatory	C17 H26 O10	8.222	408.186	390.153	82.48	82.48	0.09	Positive	7	12859	110909
121	HW_Dougles.d	DBSearch	Methylorsellinic Acid, Ethyl Ester		C11 H14 O4	8.223	211.096	210.089	86.66	86.66	0.24	Positive	2	61187	207533
122	HW_Dougles.d	DBSearch	Depdecin		C11 H16 O5	8.223	229.107	228.1	85.57	85.57	-1.28	Positive	2	18787	59819
123	HW_Dougles.d	DBSearch	3-(3-Indolyl)-2-oxopropanoic acid		C11 H9 N O3	8.224	445.08	203.059	44.37	44.37	-4.11	Positive	2	3517	29312
130	HW_Dougles.d	DBSearch	PE-Cer(d14:1(4E)/20:0)		C36 H73 N2 O6 P	8.413	683.508	660.519	69.62	69.62	2.54	Positive	3	4393	41998
131	HW_Dougles.d	DBSearch	Megastachine		C20 H29 N O3	8.507	349.247	331.213	40.59	40.59	4.65	Positive	2	2083	15568
135	HW_Dougles.d	DBSearch	PG(O-20:0/18:1(9Z))		C44 H87 O9 P	8.607	396.31	790.605	83.84	83.84	4.34	Positive	3	12480	65612
136	HW_Dougles.d	DBSearch	PE(18:3(9Z,12Z,15Z)/P-18:1(9Z))		C41 H74 N O7 P	8.617	362.769	723.523	59.58	59.58	-3.19	Positive	3	4387	24584
138	HW_Dougles.d	DBSearch	(22E)-(25S)-26,26,26-trifluoro-1α,25-dihydroxy-22,23-didehydrovitamin D3 / (22E)-(25S)-26,26,26-trifluoro-1α,25-dihydroxy-22,23-didehydrocholecalciferol		C27 H39 F3 O3	8.683	486.317	468.283	68.33	68.33	4.61	Positive	2	8942	35529
143	HW_Dougles.d	DBSearch	PS(22:0/22:0)		C50 H98 N O10 P	8.838	452.853	903.69	50.87	50.87	3.34	Positive	2	4960	24299
146	HW_Dougles.d	DBSearch	3-(2,5-Dimethoxyphenyl)propanoic acid		C11 H14 O4	8.91	211.097	210.09	83.47	83.47	-3.89	Positive	2	17611	73064
149	HW_Dougles.d	DBSearch	DAT(18:0/24:0(2Me[S],3OH[S],4Me[S],6Me[S]))		C57 H108 O14	9.026	509.396	1016.78	54.01	54.01	-2.57	Positive	2	2141	8892
151	HW_Dougles.d	DBSearch	GlcCer(d18:0/16:0)		C40 H79 N O8	9.054	724.57	701.58	68.94	68.94	0.71	Positive	2	5353	27146
153	HW_Dougles.d	DBSearch	Calenduloside G methyl ester		C43 H68 O14	9.055	831.452	808.464	49.82	49.82	-3.76	Positive	2	2805	14023
156	HW_Dougles.d	DBSearch	Acacetin 7-glucuronide		C22 H20 O11	9.108	461.108	460.101	47.4	47.4	-0.68	Positive	3	4545	39900
157	HW_Dougles.d	DBSearch	Catechin 5-O-gallate		C22 H18 O10	9.109	443.099	442.091	77.52	77.52	-2.95	Positive	2	7064	27705
158	HW_Dougles.d	DBSearch	4-(2-hydroxypropoxy)-3,5-dimethyl-Phenol		C11 H16 O3	9.113	197.117	196.11	83.69	83.69	0.21	Positive	2	11790	43744
160	HW_Dougles.d	DBSearch	PI(20:0/21:0)		C50 H97 O13 P	9.202	469.339	936.662	79.8	79.8	4.62	Positive	3	8281	46662
161	HW_Dougles.d	DBSearch	PE(18:4(6Z,9Z,12Z,15Z)/22:6(4Z,7Z,10Z,13Z,16Z,19Z))		C45 H70 N O8 P	9.228	401.263	783.485	66.04	66.04	-0.88	Positive	5	6997	51768
162	HW_Dougles.d	DBSearch	N-(3-Oxododecanoyl)homoserine lactone	a pivotal QS molecule, which regulates numerous virulence genes in P. aeruginosa and exhibits broad biological modulation effects in mammalian cells.	C16 H27 N O4	9.233	315.228	297.194	83.91	83.91	-1.26	Positive	2	14446	50047
168	HW_Dougles.d	DBSearch	Halstoctacosanolide A	Antimicrobial metabolite	C48 H76 O12	9.351	423.275	844.527	27.68	27.68	8.55	Positive	3	7234	55933
169	HW_Dougles.d	DBSearch	Ethyl 3-(N-butylacetamido)propionate	Insect repellent	C11 H21 N O3	9.376	216.159	215.152	86.53	86.53	1.4	Positive	2	27585	102288
171	HW_Dougles.d	DBSearch	5''-Phosphoribostamycin		C17 H35 N4 O13 P	9.413	552.227	534.194	77.52	77.52	0.49	Positive	2	10506	47555
172	HW_Dougles.d	DBSearch	Isoeugenitol	traditional medicine as a remedy for colic, flatulence and indigestion	C11 H10 O4	9.421	207.065	206.058	85.37	85.37	-0.2	Positive	2	11915	45399
182	HW_Dougles.d	DBSearch	Artonin K	anti cnacer, lung cancer	C21 H18 O7	9.783	383.113	382.105	75.5	75.5	-0.4	Positive	2	6986	158754
191	HW_Dougles.d	DBSearch	Ganglioside GM3 (d18:1/16:0)		C57 H104 N2 O21	10.069	577.366	1152.72	48.28	48.28	-3.91	Positive	2	3184	16024
193	HW_Dougles.d	DBSearch	(25S)-3-oxo-12beta-acetoxy-cholest-1,4-dien-26-oic acid		C30 H44 O5	10.094	485.326	484.319	76.46	76.46	0.14	Positive	2	6519	29579
201	HW_Dougles.d	DBSearch	(25R)-5alpha-spirostan-3beta,6alpha,23S-triol 6-O-beta-D-glucopyranoside		C34 H58 O10	10.275	649.391	626.403	68.32	68.32	-0.15	Positive	2	3716	16011
202	HW_Dougles.d	DBSearch	Pristimerol		C30 H42 O4	10.275	467.315	466.308	74.15	74.15	1.04	Positive	2	4919	24466
203	HW_Dougles.d	DBSearch	Liquoric acid	anti microbial, antioxidant, cytotoxic	C30 H44 O5	10.278	485.326	484.319	73.72	73.72	0.13	Positive	2	7597	43523
205	HW_Dougles.d	DBSearch	LysoPE(0:0/22:0)		C27 H56 N O7 P	10.307	555.411	537.377	67.28	67.28	4.32	Positive	2	13130	52869
206	HW_Dougles.d	DBSearch	DL-threo-PDMP		C23 H38 N2 O3	10.575	391.294	390.287	40.66	40.66	4.26	Positive	2	2478	15445
207	HW_Dougles.d	DBSearch	Deoxyloganin		C17 H26 O9	11.048	392.193	374.159	40.46	40.46	-4.42	Positive	2	4850	21149
208	HW_Dougles.d	DBSearch	Granisetron metabolite 4	nausea management	C17 H22 N4 O2	11.057	332.208	314.174	47.17	47.17	1.16	Positive	2	4714	22932
209	HW_Dougles.d	DBSearch	Jasmolone glucoside	Insecticide	C17 H26 O7	11.24	343.176	342.169	80.86	80.86	-2.87	Positive	2	20509	78070
210	HW_Dougles.d	DBSearch	Trp Val Gly		C18 H24 N4 O4	11.242	378.214	360.18	46.79	46.79	-1.48	Positive	2	6016	26183
211	HW_Dougles.d	DBSearch	Val Trp Val		C21 H30 N4 O4	11.421	420.26	402.226	81.12	81.12	0.6	Positive	2	7533	28911
214	HW_Dougles.d	DBSearch	Edulone A		C22 H22 O8	11.702	415.139	414.131	62.43	62.43	0.08	Positive	2	5566	150100
216	HW_Dougles.d	DBSearch	1-NBD-decanoyl-2-decanoyl-sn-Glycerol		C29 H46 N4 O8	11.875	596.364	578.33	71.83	71.83	2.41	Positive	2	5822	23265
217	HW_Dougles.d	DBSearch	NAc-FnorLRF-amide		C32 H46 N8 O5	11.957	640.39	622.356	65.19	65.19	4.21	Positive	2	5559	19989
221	HW_Dougles.d	DBSearch	PI(14:0/20:3(8Z,11Z,14Z))		C43 H77 O13 P	12.223	417.262	832.511	62.25	62.25	-1.13	Positive	2	3267	14649
230	HW_Dougles.d	DBSearch	C16 Sphinganine		C16 H35 N O2	12.794	274.274	273.267	85.05	85.05	-1.74	Positive	2	13502	49369
231	HW_Dougles.d	DBSearch	Phytosphingosine	Anti-aging, hydration	C18 H39 N O3	12.898	318.301	317.293	78.82	78.82	-1.09	Positive	2	9258	34277
233	HW_Dougles.d	DBSearch	2,6-Nonadien-1-ol	flovouring (vege taste)	C9 H16 O	13.336	158.154	140.12	87.1	87.1	2.51	Positive	2	18146	112691
234	HW_Dougles.d	DBSearch	(-)-trans-C75		C14 H22 O4	13.652	255.159	254.152	86.26	86.26	-0.5	Positive	3	11635	60850
235	HW_Dougles.d	DBSearch	(S)-p-Mentha-1,8-dien-10-yl acetate		C12 H18 O2	15.016	195.138	194.131	81	81	-0.5	Positive	2	14540	62253
237	HW_Dougles.d	DBSearch	N-Methyldioctylamine		C17 H37 N	15.089	256.3	255.293	84.46	84.46	-0.84	Positive	2	13612	87802
238	HW_Dougles.d	DBSearch	His Met Lys		C17 H30 N6 O4 S	15.419	415.212	414.205	47.36	47.36	-0.77	Positive	3	5705	26514
241	HW_Dougles.d	DBSearch	Polysorbate 60		C22 H42 O8	18.122	452.322	434.288	81.38	81.38	-0.08	Positive	2	10357	67906
244	HW_Dougles.d	DBSearch	Emmotin A	Terpenes	C16 H22 O4	18.974	279.159	278.152	81.05	81.05	-1.26	Positive	5	14079	142599
248	HW_Dougles.d	DBSearch	(25S)-5alpha-cholestan-3beta,6alpha,7beta,8beta,15alpha,16beta,26-heptol		C27 H48 O7	19.463	502.374	484.34	98.61	98.61	-0.41	Positive	3	20592	165189
249	HW_Dougles.d					19.5	458.349	457.341				Positive	2	15292	124232
250	HW_Dougles.d	DBSearch	24-Nor-5β-cholane-3α,7α,12α,22,23-pentol		C23 H40 O5	19.521	397.295	396.288	47.56	47.56	-0.38	Positive	2	2853	18880
251	HW_Dougles.d	DBSearch	N-stearoyl glutamic acid		C23 H43 N O5	19.522	414.321	413.314	76.54	76.54	0.41	Positive	2	9104	70157
254	HW_Dougles.d	DBSearch	28:2(5Z,9Z)(6Br)		C28 H51 Br O2	20.609	499.313	498.306	51.93	51.93	3.16	Positive	3	7466	47571
257	HW_Dougles.d	DBSearch	Dihydrostreptomycin 6-phosphate	Anti microbal	C21 H42 N7 O15 P	21.652	702.214	663.248	60.5	60.5	-0.61	Positive	3	2633	33394
259	HW_Dougles.d	DBSearch	1α,25-dihydroxy-3-deoxy-19-nor-22-oxavitamin D3 / 1α,25-dihydroxy-3-deoxy-19-nor-22-oxacholecalciferol	Vitamin D3 deriaratives	C25 H42 O3	22.187	408.348	390.314	81.63	81.63	-1.25	Positive	2	6255	40279
264	HW_Dougles.d	DBSearch	Dihydrotachysterol	treatment for lack of calcium in blood	C28 H46 O	22.194	421.345	398.358	33.08	33.08	-7.51	Positive	2	4026	28407
268	HW_Dougles.d	DBSearch	Camptothecin	Anti cancer	C20 H16 N2 O4	22.588	371.101	348.111	58.54	58.54	-0.96	Positive	2	5924	29199
271	HW_Dougles.d	DBSearch	Hexacosanedioic acid	Breast cancer, colon cancer	C26 H50 O4	22.742	449.36	426.371	80.43	80.43	0.75	Positive	2	5864	46376
272	HW_Dougles.d	DBSearch	Ganoderic acid DM	Prostate cancer treatment	C30 H44 O4	22.747	469.331	468.324	72.58	72.58	-0.14	Positive	2	3753	21674
273	HW_Dougles.d	DBSearch	N-stearoyl valine	anti microbial/fats	C23 H45 N O3	22.75	406.328	383.339	45.72	45.72	2.18	Positive	3	4098	31968
274	HW_Dougles.d	DBSearch	Pyrimidifen	Used as insecticide	C20 H28 Cl N3 O2	22.753	395.221	377.186	82.13	82.13	1.65	Positive	4	10123	131698
277	HW_Dougles.d	DBSearch	N-Hexadecanoylpyrrolidine		C20 H39 N O	23.347	310.311	309.303	66.49	66.49	-0.93	Positive	2	8578	83212
280	HW_Dougles.d	DBSearch	Pipericine		C22 H41 N O	23.764	336.327	335.319	83.24	83.24	-1.62	Positive	2	5313	34064
283	HW_Dougles.d	DBSearch	17,20-dimethyl Prostaglandin F1α		C22 H40 O5	24.914	423.252	384.288	66.87	66.87	-0.51	Positive	3	8568	119647
285	HW_Dougles.d	DBSearch	N-Cyclohexanecarbonylpentadecylamine		C22 H43 N O	25.686	338.342	337.335	98.83	98.83	-1.51	Positive	5	205792	2248113
286	HW_Dougles.d	DBSearch	3α,12α-Dihydroxy-5β-chol-8(14)-en-24-oic Acid		C24 H38 O4	25.735	391.285	390.277	82.1	82.1	-1.12	Positive	4	12664	185180
287	HW_Dougles.d	DBSearch	CAY10621		C26 H45 N O4	25.74	436.343	435.335	76.77	76.77	-1.36	Positive	2	8598	78495
288	HW_Dougles.d	DBSearch	Docosanedioic acid		C22 H42 O4	25.868	371.317	370.31	72.03	72.03	-4.65	Positive	4	11777	208569
289	HW_Dougles.d	DBSearch	Tetracosanedioic acid		C24 H46 O4	25.871	416.373	398.339	77.37	77.37	0.23	Positive	2	7063	74909
