# Supplementary material for: Unveiling the Antidiabetic Potential of Achyranthes aspera In Vitro and In Silico Efficacy Insights
Source: Research Square preprint supplement (doi:10.21203/rs.3.rs-5777722/v1), 2025-04-29
Supplement: Supplementary file 2 [file 2a71313d8efb145f3275e1f6.docx]

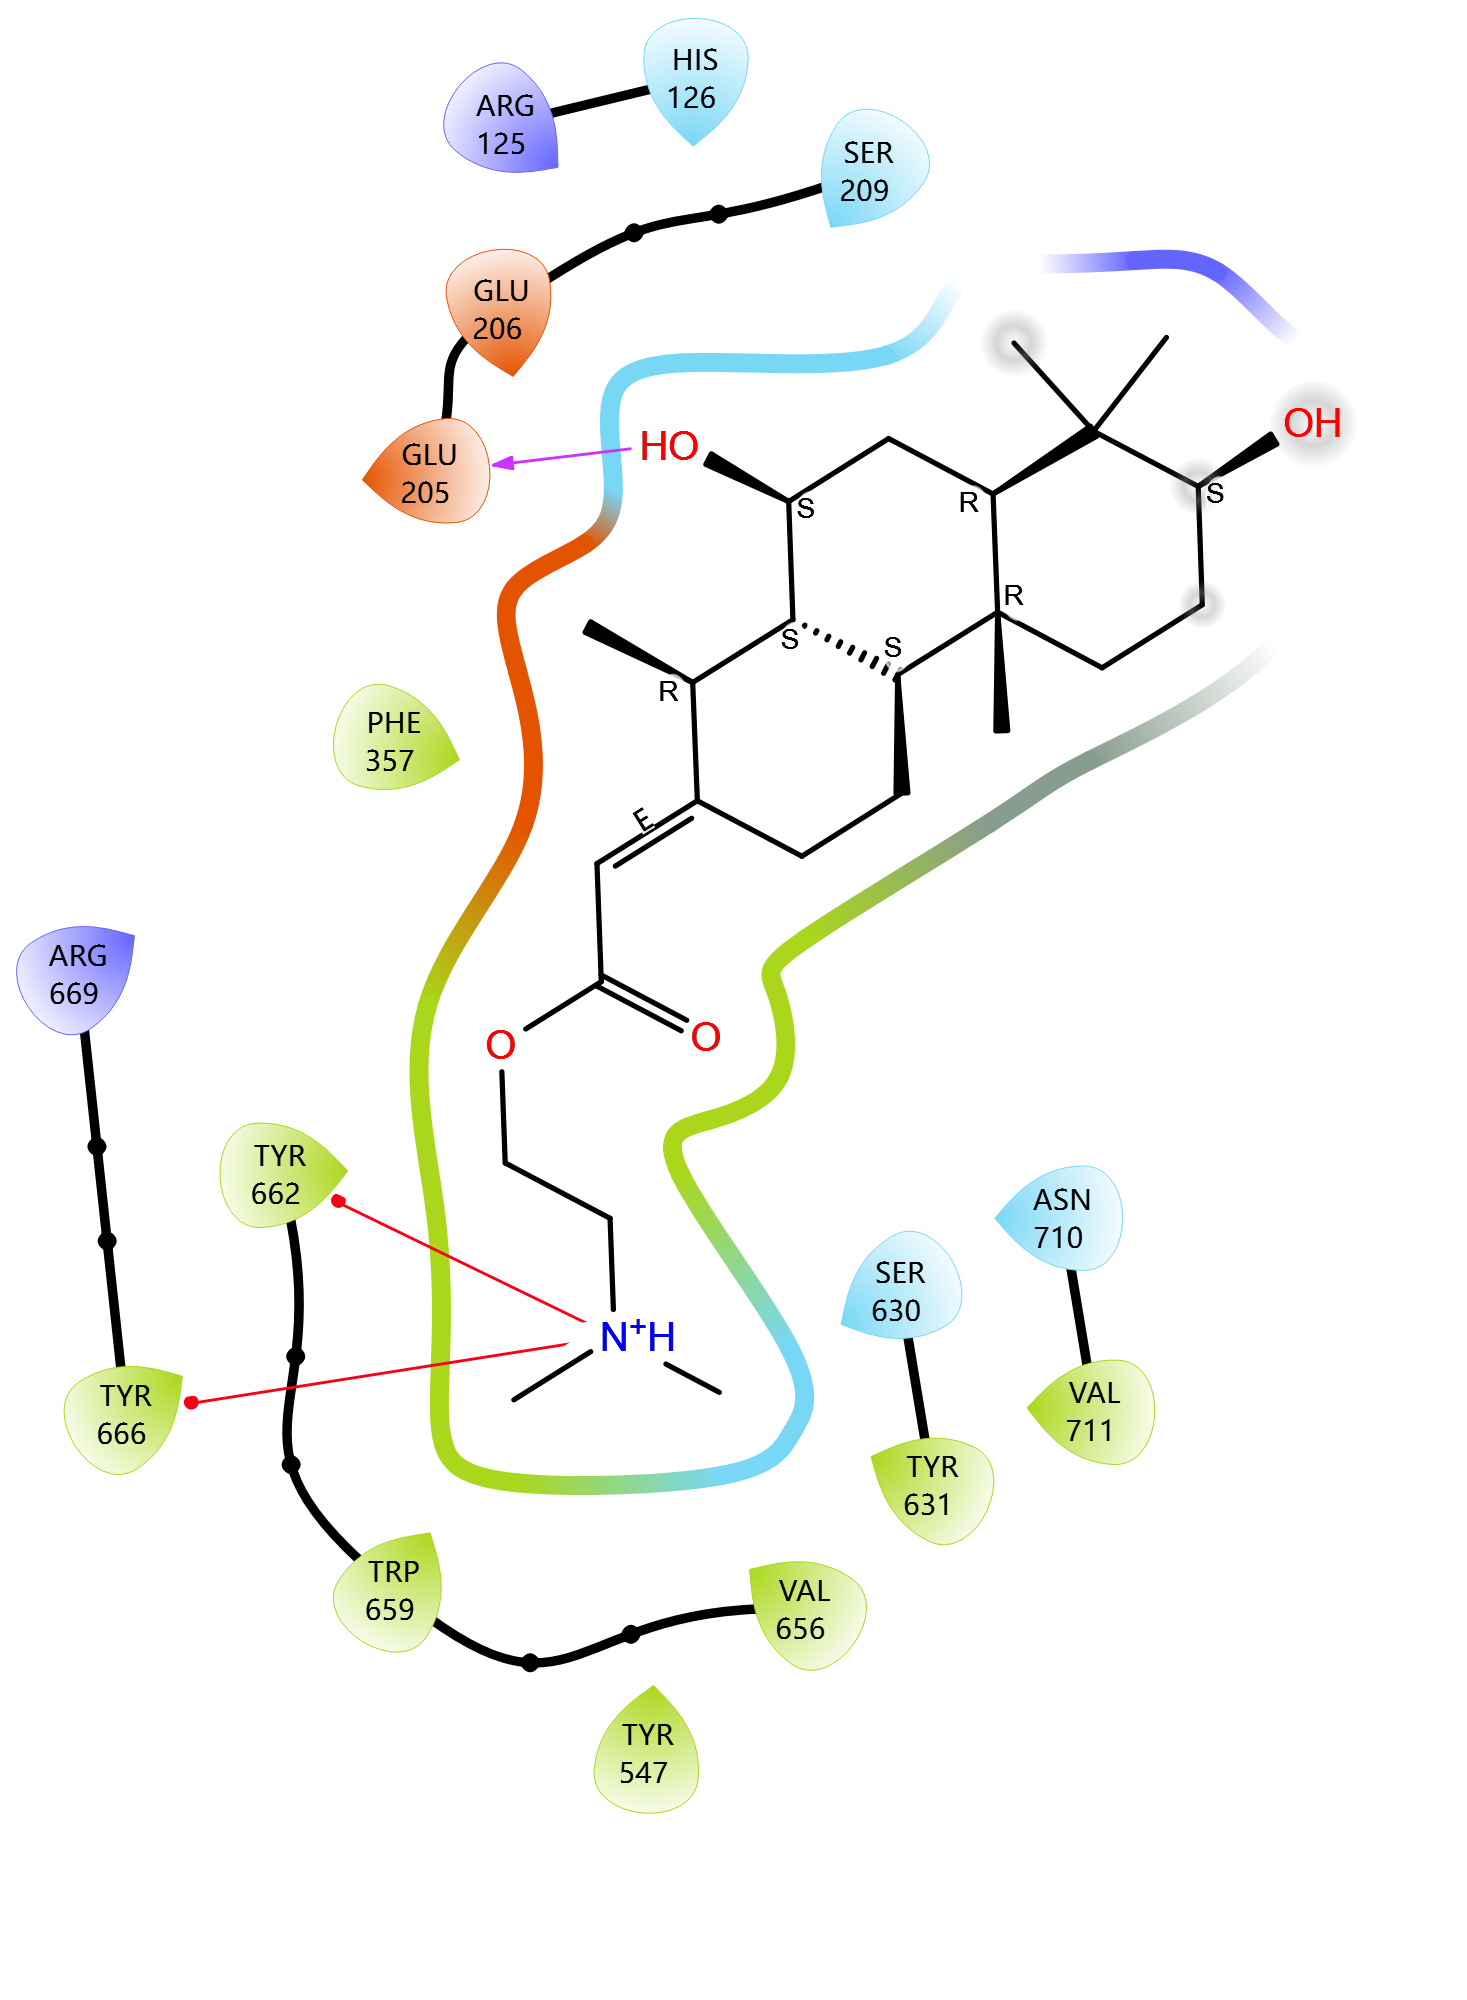


**Figure S4: Ligand Interaction Diagram of [*Catechin 5-O-gallate*] in the Binding Pocket of [**DPP-4 protein (6B1E Chain A)**]
Legend: The diagram shows 2D interactions between the ligand and surrounding amino acid residues in the protein's active site.**


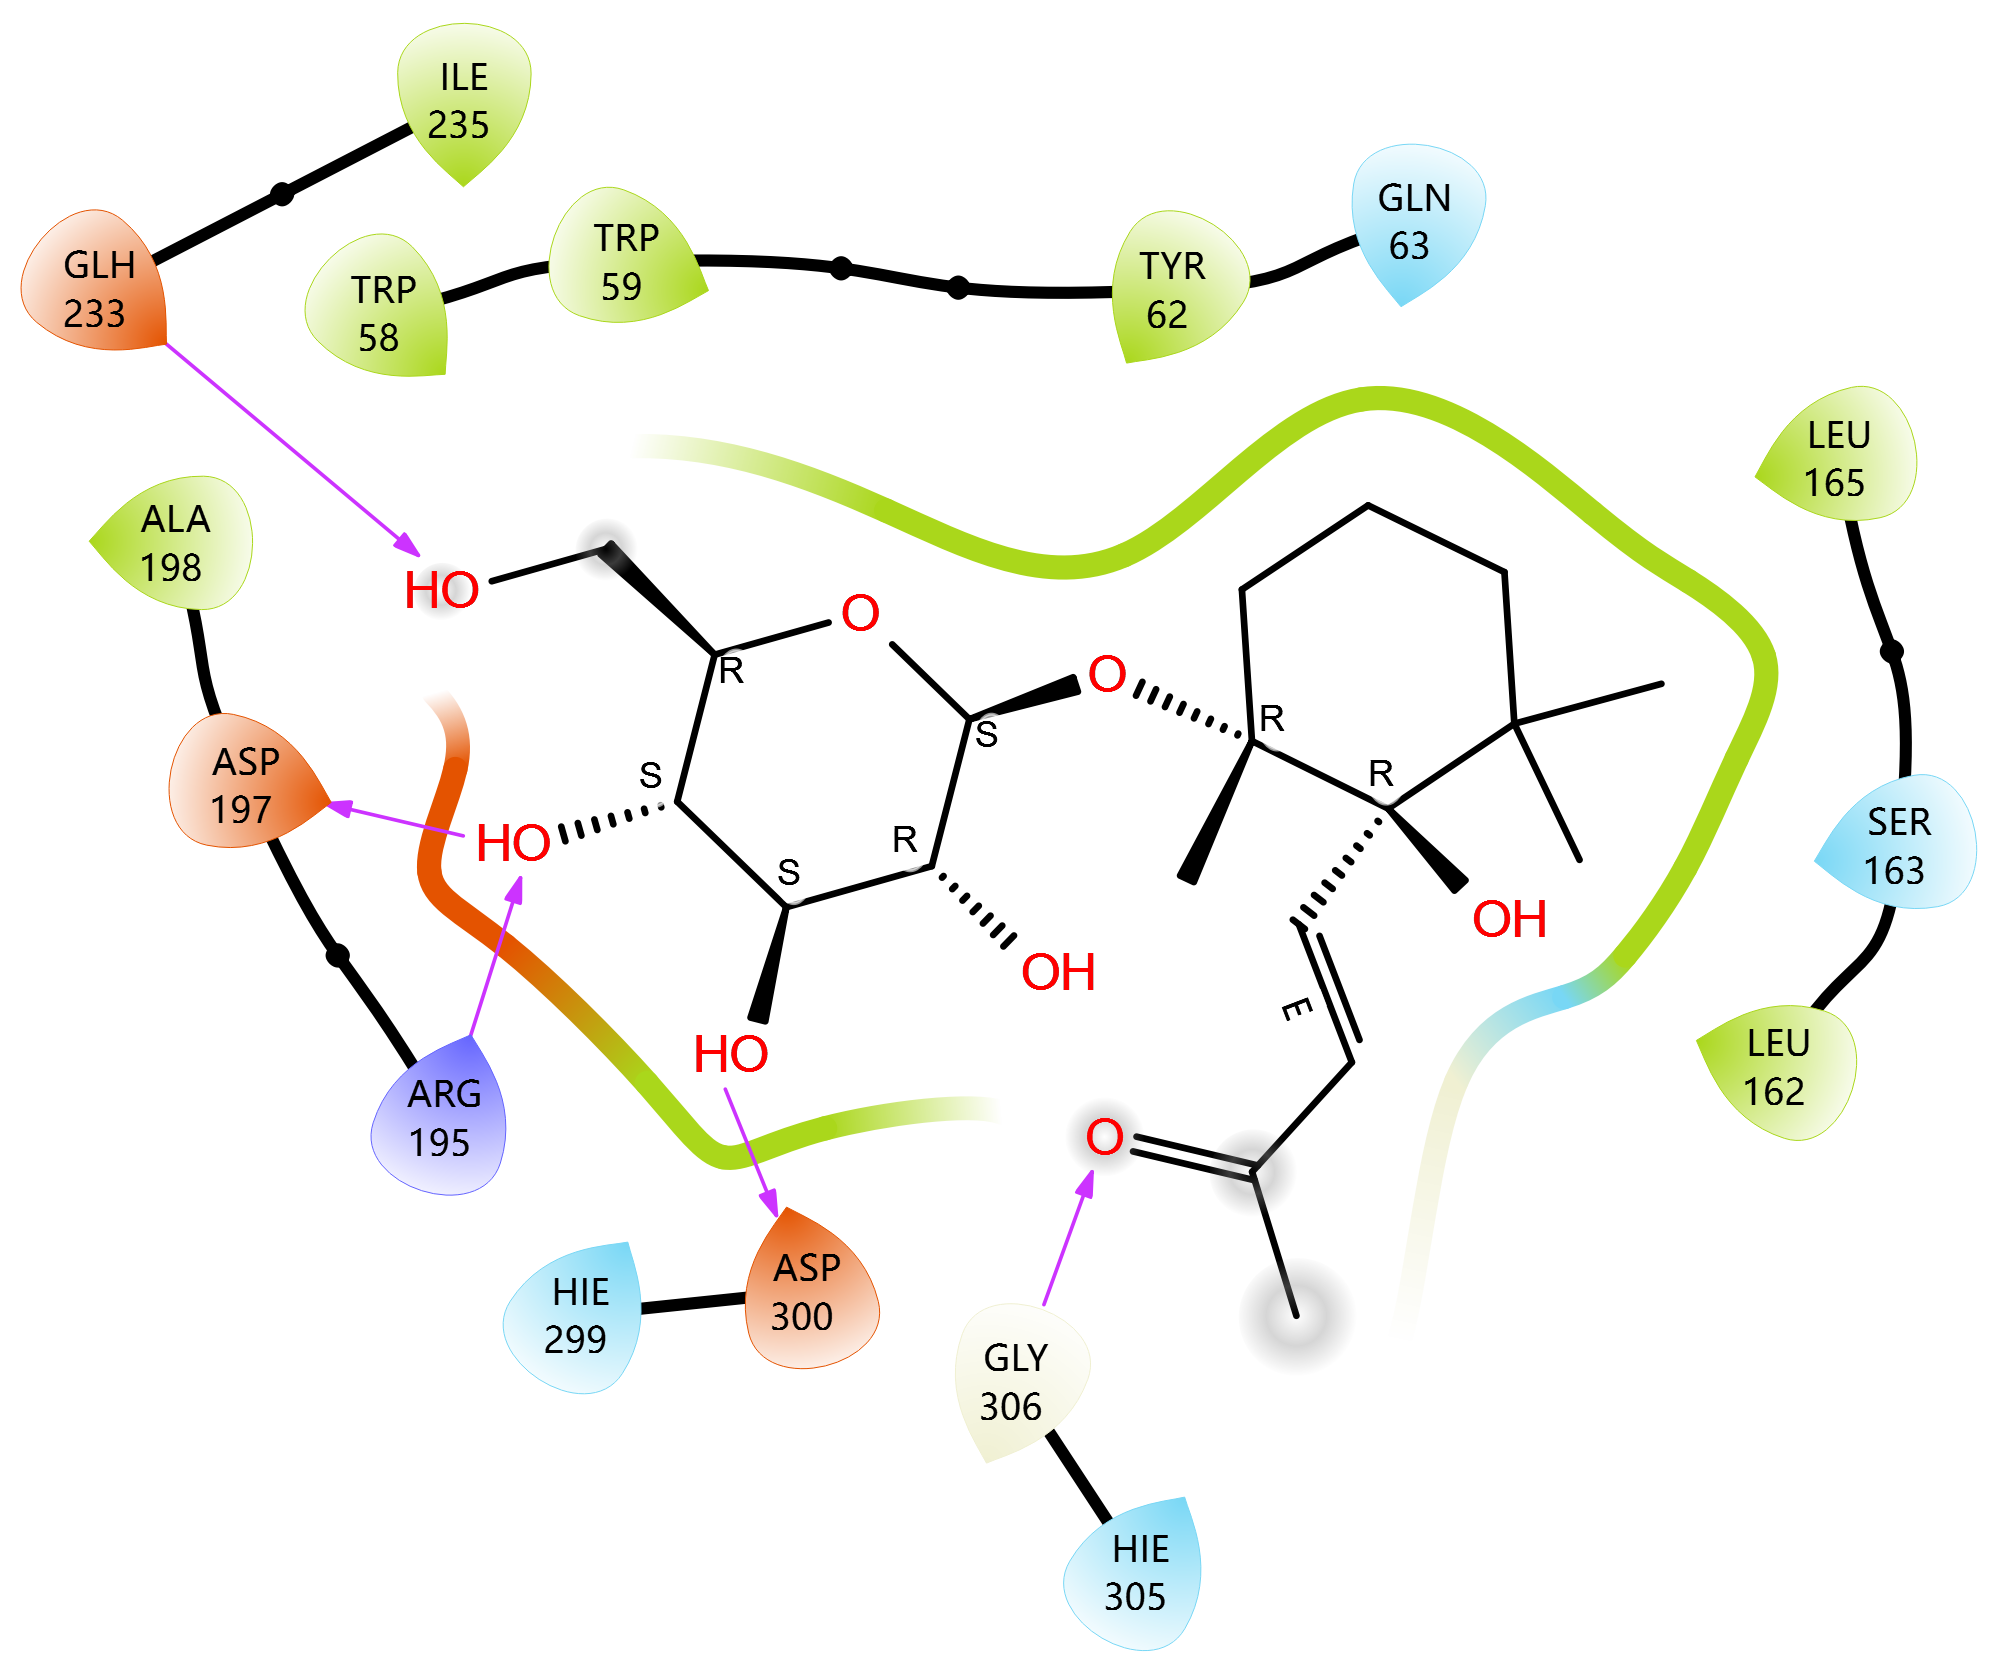


**Figure S5: Ligand Interaction Diagram of [*Crosatoside B*] in the Binding Pocket of [**DPP-4 protein (6B1E Chain A)**]
Legend: The diagram shows 2D interactions between the ligand and surrounding amino acid residues in the protein's active site.**


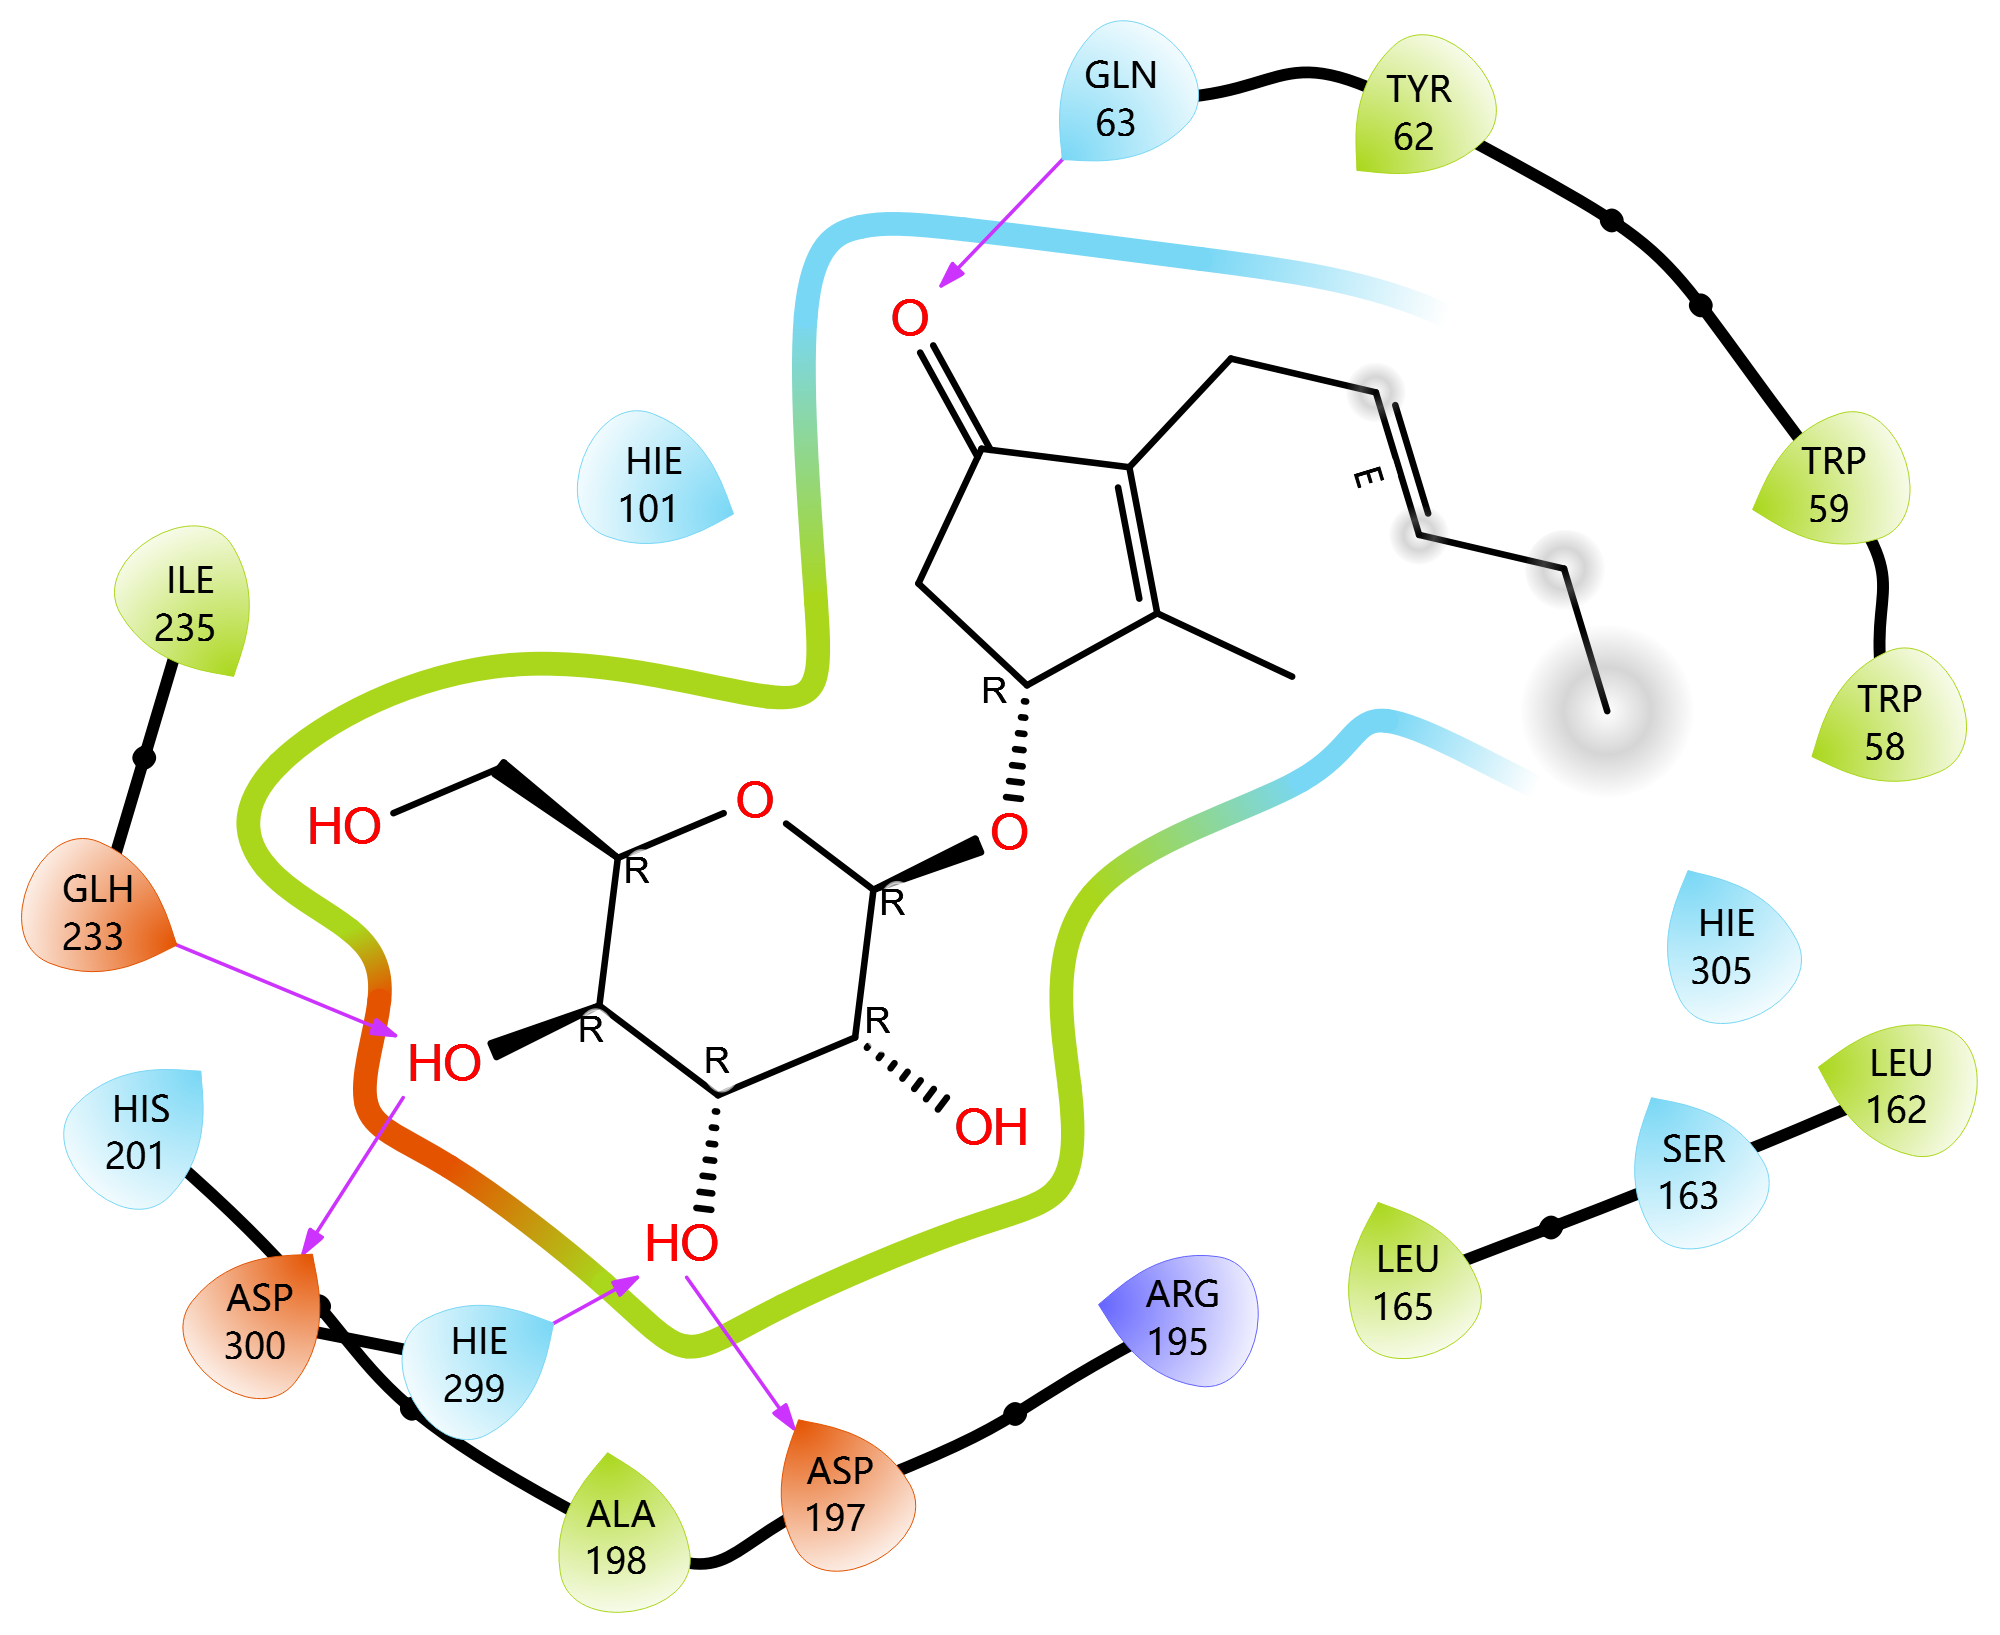


**Figure S6: Ligand Interaction Diagram of [*Hypoglycin*] in the Binding Pocket of [**DPP-4 protein (6B1E Chain A)**]
Legend: The diagram shows 2D interactions between the ligand and surrounding amino acid residues in the protein's active site.**
