# Supplementary material for: Unveiling the Antidiabetic Potential of Achyranthes aspera In Vitro and In Silico Efficacy Insights
Source: Research Square preprint supplement (doi:10.21203/rs.3.rs-5777722/v1), 2025-04-29
Supplement: Supplementary file 3 [file 5ea4d528af44c579668dcbaa.docx]

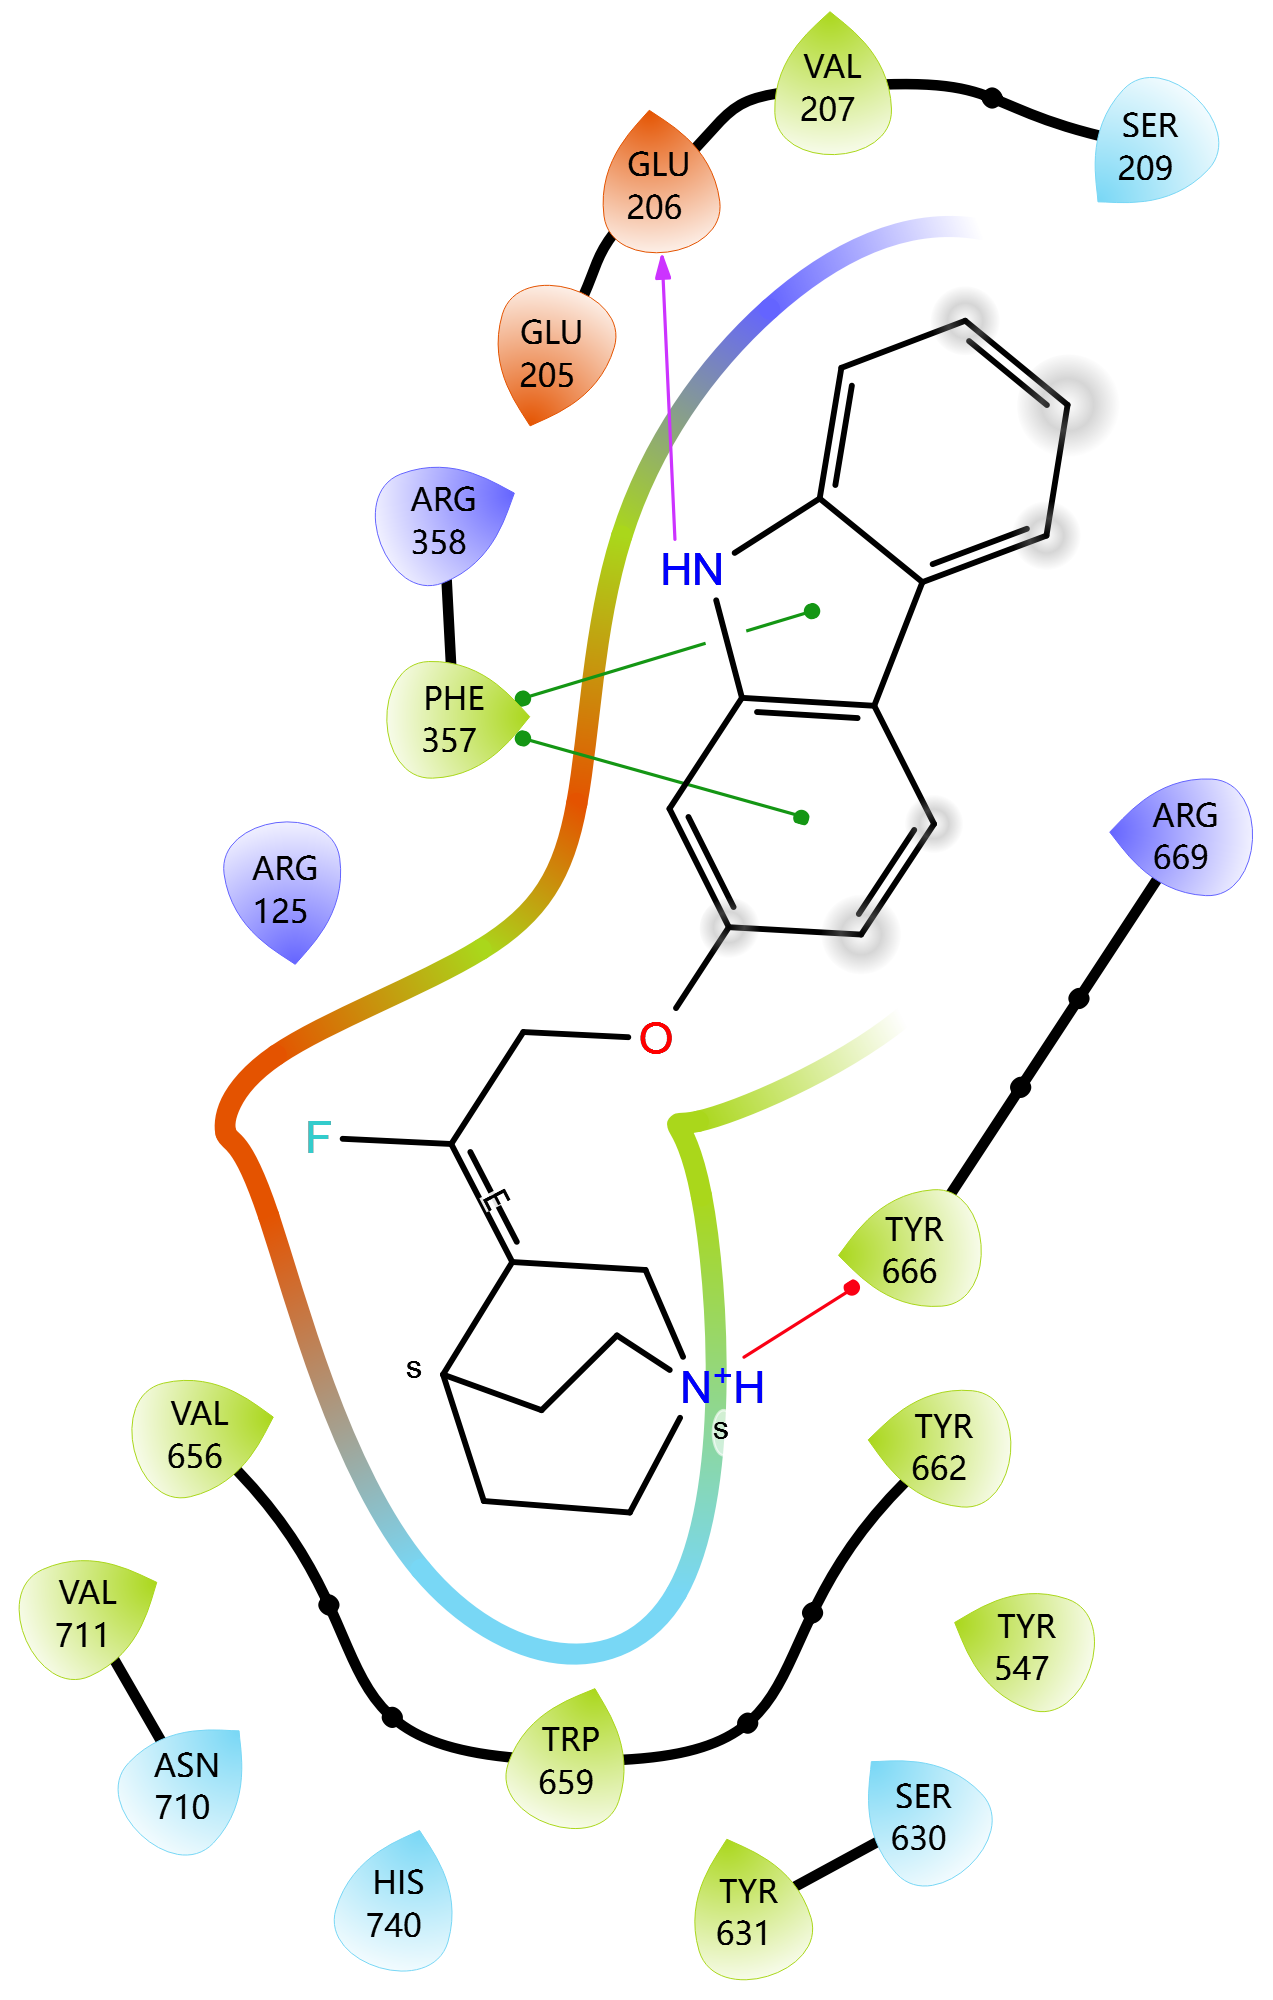


**Figure S1:Ligand Interaction Diagram of [*Catechin 5-O-gallate*] in the Binding Pocket of [**3DHP**]
Legend: The diagram shows 2D interactions between the ligand and surrounding amino acid residues in the protein's active site.**


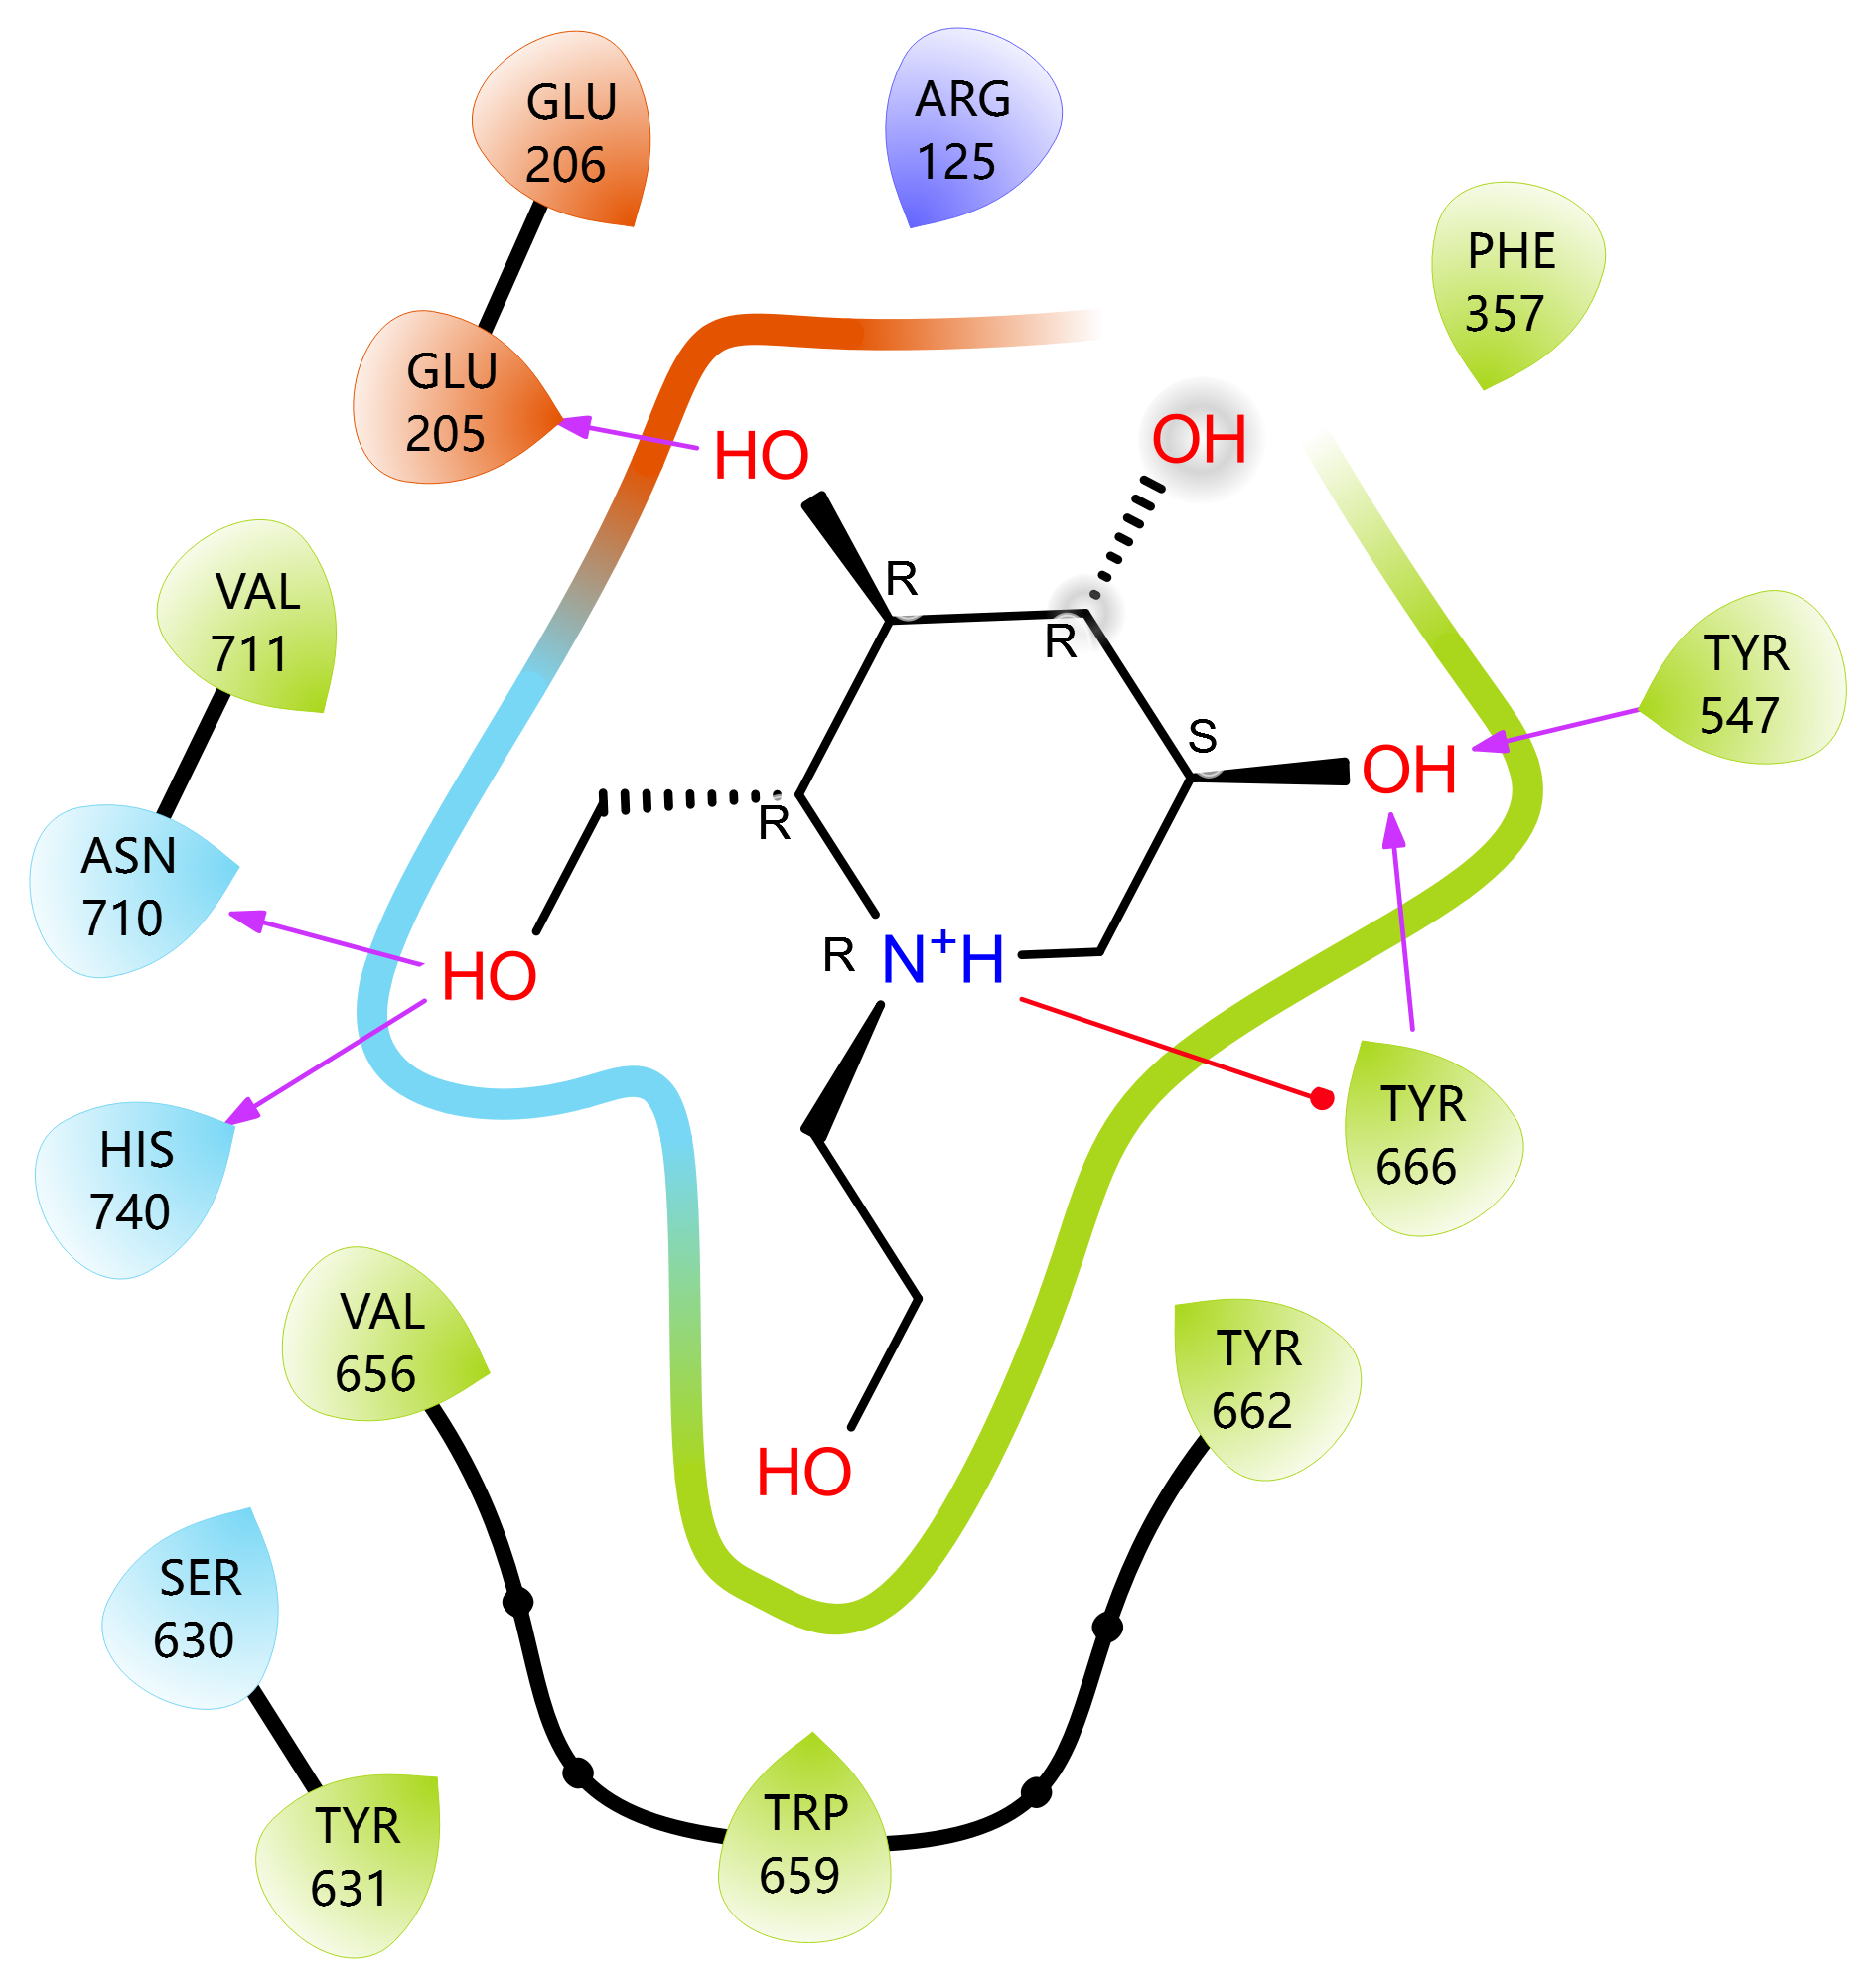


**Figure S2: Ligand Interaction Diagram of [*Crosatoside B*] in the Binding Pocket of [**3DHP**]
Legend: The diagram shows 2D interactions between the ligand and surrounding amino acid residues in the protein's active site.**


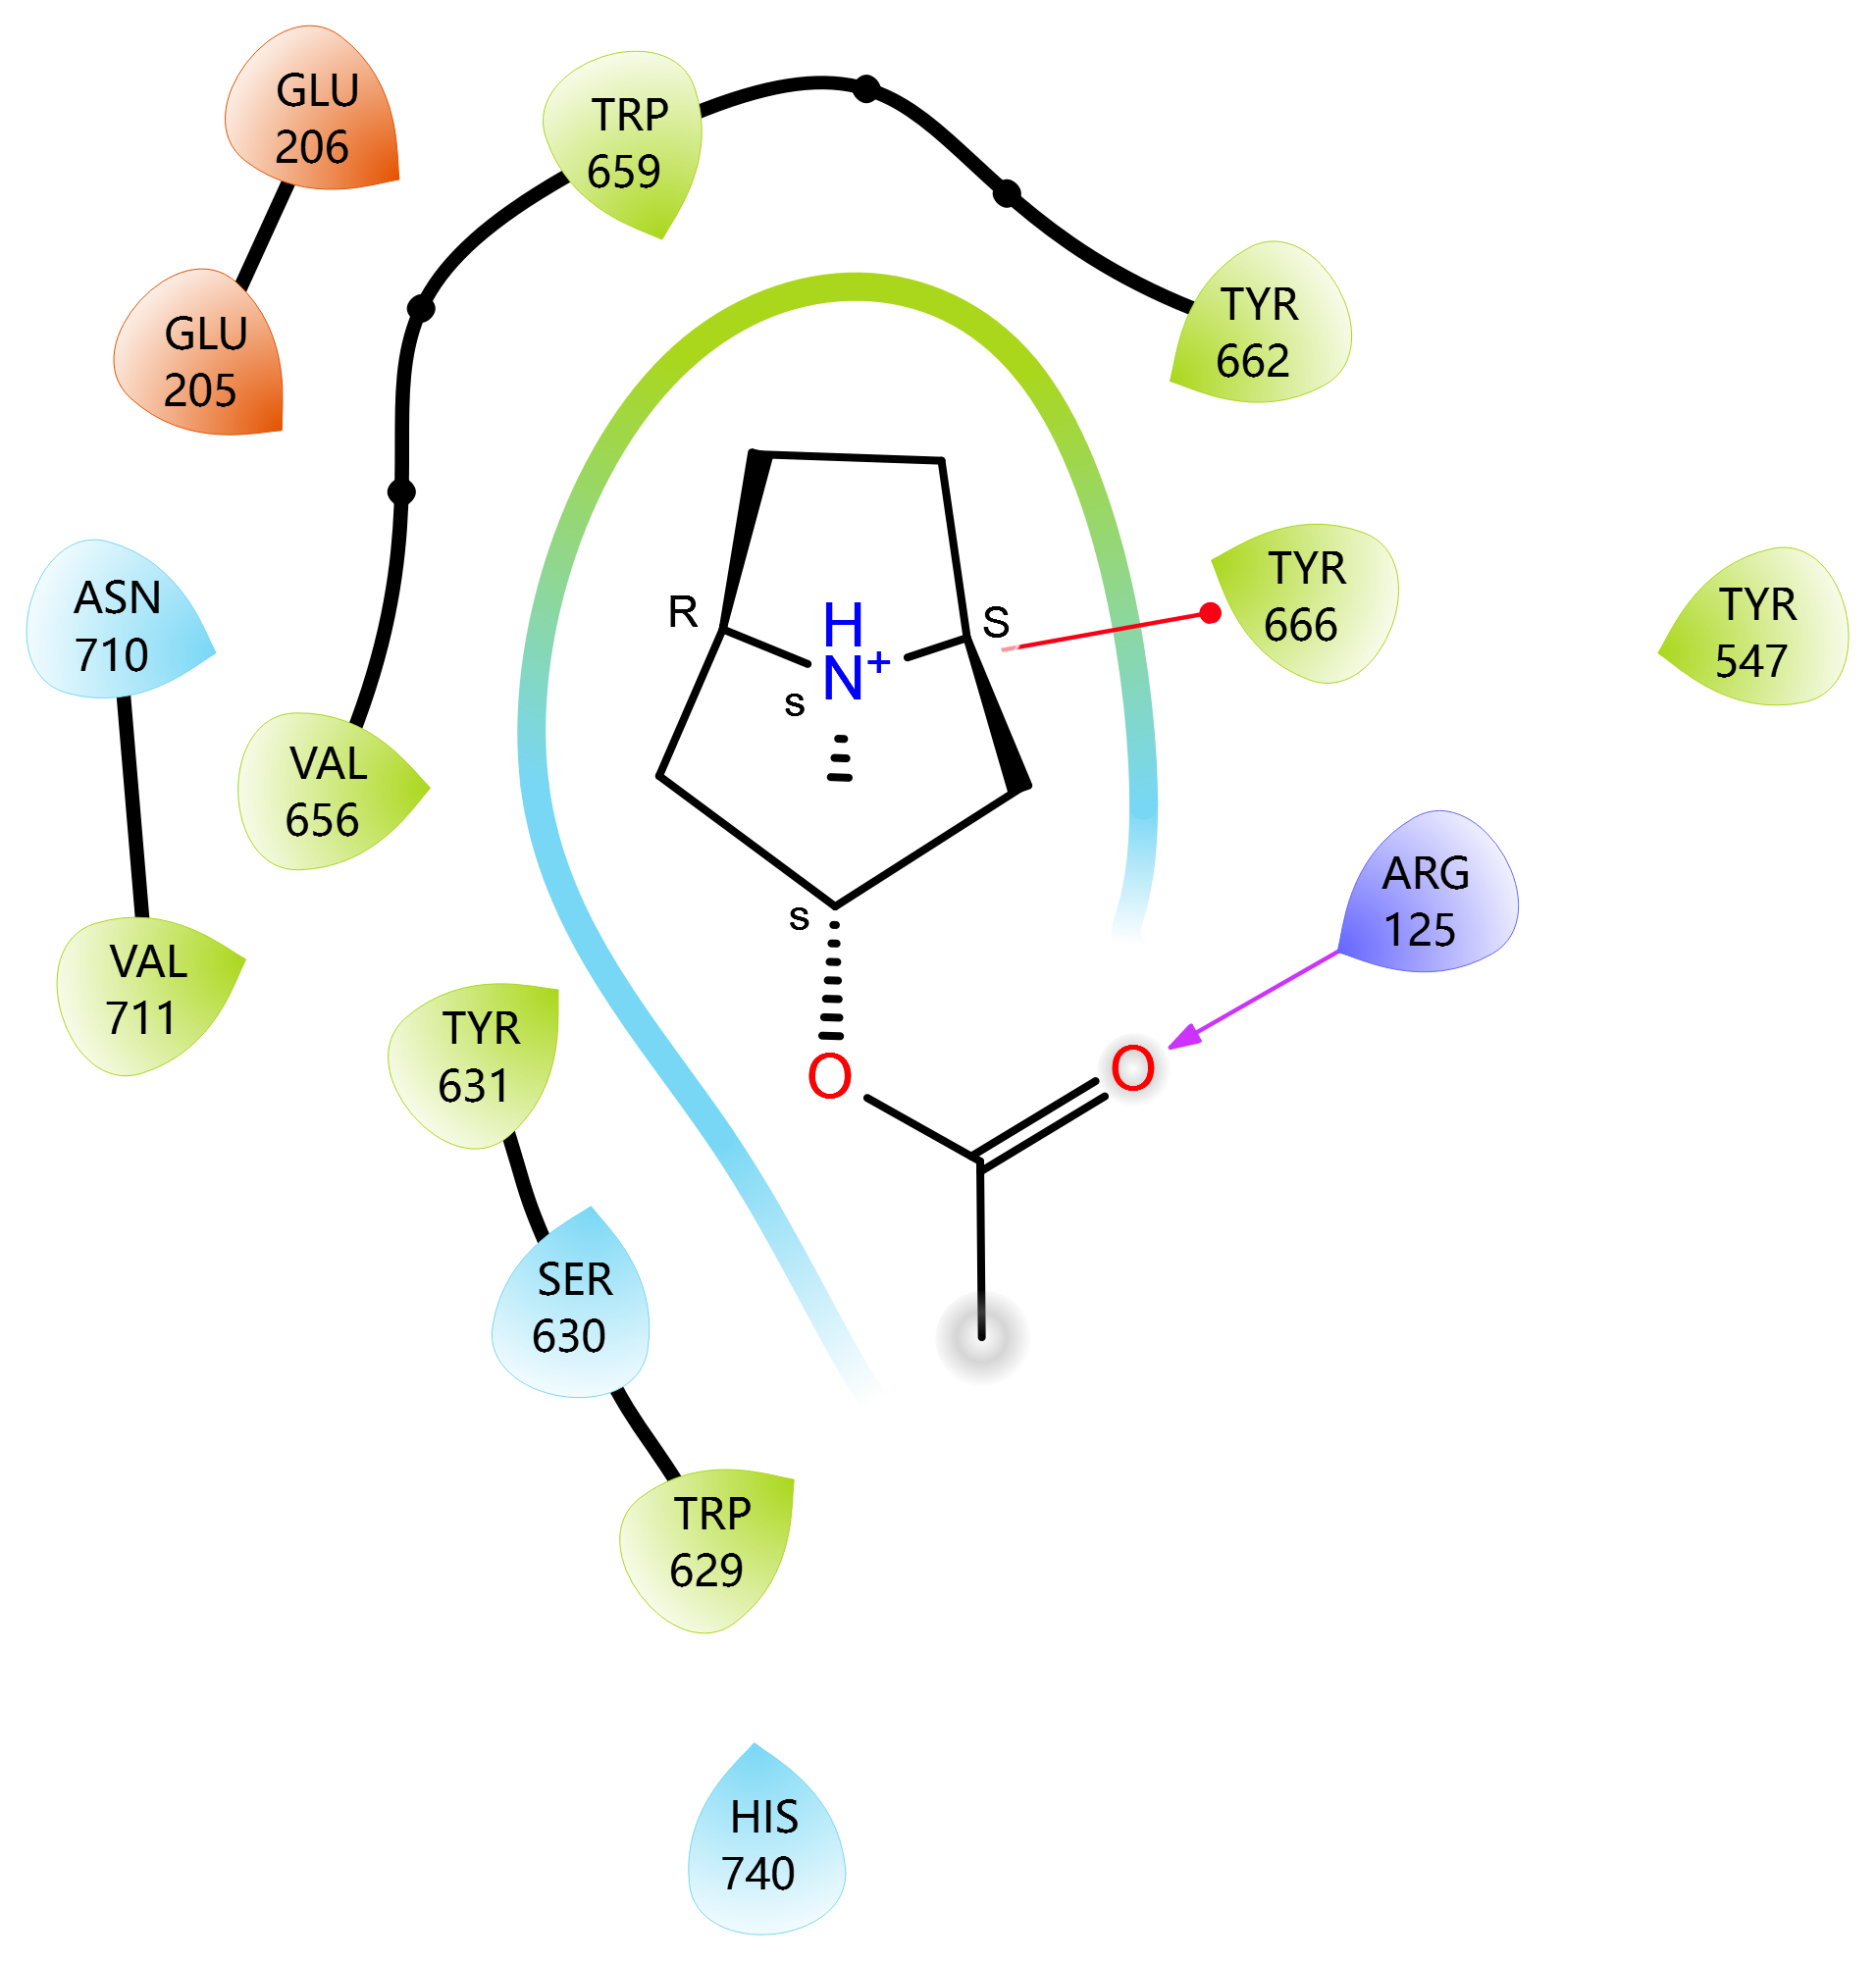


**Figure S3: Ligand Interaction Diagram of [*Hypoglycin*] in the Binding Pocket of [**3DHP**]*.***

**Legend: The diagram shows 2D interactions between the ligand and surrounding amino acid residues in the protein's active site.**
