# Supplementary material for: Unveiling the Antidiabetic Potential of Achyranthes aspera In Vitro and In Silico Efficacy Insights
Source: Research Square preprint supplement (doi:10.21203/rs.3.rs-5777722/v1), 2025-04-29
Supplement: Supplementary file 4 [file 6aacdfb594a56386e3e16e0b.xlsx]

## Sheet: Title
supplementary Material 2: The full list of the compounds XP Docking and MM-GBSA Calculation

## Sheet: Table s7
Title	Entry ID	Entry Name	PUBCHEM_COMPOUND_CID	PUBCHEM_COMPOUND_CANONICALIZED	PUBCHEM_CACTVS_COMPLEXITY	PUBCHEM_CACTVS_HBOND_ACCEPTOR	PUBCHEM_CACTVS_HBOND_DONOR	PUBCHEM_CACTVS_ROTATABLE_BOND	PUBCHEM_CACTVS_SUBSKEYS	PUBCHEM_IUPAC_OPENEYE_NAME	PUBCHEM_IUPAC_CAS_NAME	PUBCHEM_IUPAC_NAME_MARKUP	PUBCHEM_IUPAC_NAME	PUBCHEM_IUPAC_SYSTEMATIC_NAME	PUBCHEM_IUPAC_TRADITIONAL_NAME	PUBCHEM_IUPAC_INCHI	PUBCHEM_IUPAC_INCHIKEY	PUBCHEM_XLOGP3_AA	PUBCHEM_EXACT_MASS	PUBCHEM_MOLECULAR_FORMULA	PUBCHEM_MOLECULAR_WEIGHT	PUBCHEM_OPENEYE_CAN_SMILES	PUBCHEM_OPENEYE_ISO_SMILES	PUBCHEM_CACTVS_TPSA	PUBCHEM_MONOISOTOPIC_WEIGHT	PUBCHEM_TOTAL_CHARGE	PUBCHEM_HEAVY_ATOM_COUNT	PUBCHEM_ATOM_DEF_STEREO_COUNT	PUBCHEM_ATOM_UDEF_STEREO_COUNT	PUBCHEM_BOND_DEF_STEREO_COUNT	PUBCHEM_BOND_UDEF_STEREO_COUNT	PUBCHEM_ISOTOPIC_ATOM_COUNT	PUBCHEM_COMPONENT_COUNT	PUBCHEM_CACTVS_TAUTO_COUNT	PUBCHEM_COORDINATE_TYPE	PUBCHEM_BONDANNOTATIONS	chiral flag	version	Source Path	Source File	Source File Index	PUBCHEM_COMPOUND_ID_TYPE	PUBCHEM_SUBSTANCE_ID	PUBCHEM_SUBSTANCE_VERSION	PUBCHEM_EXT_DATASOURCE_NAME	PUBCHEM_EXT_DATASOURCE_REGID	PUBCHEM_SUBSTANCE_SYNONYM	PUBCHEM_XREF_EXT_ID	PUBCHEM_EXT_DATASOURCE_URL
439606	1817	Structure2D_COMPOUND_CID_439606.1	439606	1	1510	31	20	16	AAADcfB8PgAAAAAAAAAAAAAAAAAAAAAAAAAkSJEiQAAAAAAAAAAAGgAACAAACBSwgAMACAAABgAAAAAAAAAAAAAAAAAAAAAAAAAREAIAAAAiQAAFAAAHAAHAYAwAAAAAAAAAAAAAAAAAAAAAAAAAAAAAAA==	(2R,3R,4S,5S,6R)-2-[(2R,3S,4R,5R,6R)-6-[(2R,3S,4R,5R,6R)-6-[(2R,3S,4R,5R,6R)-6-[(2R,3S,4R,5R,6R)-4,5-dihydroxy-2-(hydroxymethyl)-6-[(2R,3S,4R,5R)-4,5,6-trihydroxy-2-(hydroxymethyl)tetrahydropyran-3-yl]oxy-tetrahydropyran-3-yl]oxy-4,5-dihydroxy-2-(hydroxymethyl)tetrahydropyran-3-yl]oxy-4,5-dihydroxy-2-(hydroxymethyl)tetrahydropyran-3-yl]oxy-4,5-dihydroxy-2-(hydroxymethyl)tetrahydropyran-3-yl]oxy-6…	(2R,3R,4S,5S,6R)-2-[[(2R,3S,4R,5R,6R)-6-[[(2R,3S,4R,5R,6R)-6-[[(2R,3S,4R,5R,6R)-6-[[(2R,3S,4R,5R,6R)-4,5-dihydroxy-2-(hydroxymethyl)-6-[[(2R,3S,4R,5R)-4,5,6-trihydroxy-2-(hydroxymethyl)-3-oxanyl]oxy]-3-oxanyl]oxy]-4,5-dihydroxy-2-(hydroxymethyl)-3-oxanyl]oxy]-4,5-dihydroxy-2-(hydroxymethyl)-3-oxanyl]oxy]-4,5-dihydroxy-2-(hydroxymethyl)-3-oxanyl]oxy]-6-(hydroxymethyl)oxane-3,4,5-triol	(2<I>R</I>,3<I>R</I>,4<I>S</I>,5<I>S</I>,6<I>R</I>)-2-[(2<I>R</I>,3<I>S</I>,4<I>R</I>,5<I>R</I>,6<I>R</I>)-6-[(2<I>R</I>,3<I>S</I>,4<I>R</I>,5<I>R</I>,6<I>R</I>)-6-[(2<I>R</I>,3<I>S</I>,4<I>R</I>,5<I>R</I>,6<I>R</I>)-6-[(2<I>R</I>,3<I>S</I>,4<I>R</I>,5<I>R</I>,6<I>R</I>)-4,5-dihydroxy-2-(hydroxymethyl)-6-[(2<I>R</I>,3<I>S</I>,4<I>R</I>,5<I>R</I>)-4,5,6-trihydroxy-2-(hydroxymethyl)oxan-3-yl]oxyoxa…	(2R,3R,4S,5S,6R)-2-[(2R,3S,4R,5R,6R)-6-[(2R,3S,4R,5R,6R)-6-[(2R,3S,4R,5R,6R)-6-[(2R,3S,4R,5R,6R)-4,5-dihydroxy-2-(hydroxymethyl)-6-[(2R,3S,4R,5R)-4,5,6-trihydroxy-2-(hydroxymethyl)oxan-3-yl]oxyoxan-3-yl]oxy-4,5-dihydroxy-2-(hydroxymethyl)oxan-3-yl]oxy-4,5-dihydroxy-2-(hydroxymethyl)oxan-3-yl]oxy-4,5-dihydroxy-2-(hydroxymethyl)oxan-3-yl]oxy-6-(hydroxymethyl)oxane-3,4,5-triol	(2R,3S,4S,5R,6R)-2-(hydroxymethyl)-6-[(2R,3S,4R,5R,6R)-2-(hydroxymethyl)-6-[(2R,3S,4R,5R,6R)-2-(hydroxymethyl)-6-[(2R,3S,4R,5R,6R)-2-(hydroxymethyl)-6-[(2R,3S,4R,5R,6R)-2-(hydroxymethyl)-6-[(2R,3S,4R,5R)-2-(hydroxymethyl)-4,5,6-tris(oxidanyl)oxan-3-yl]oxy-4,5-bis(oxidanyl)oxan-3-yl]oxy-4,5-bis(oxidanyl)oxan-3-yl]oxy-4,5-bis(oxidanyl)oxan-3-yl]oxy-4,5-bis(oxidanyl)oxan-3-yl]oxy-oxane-3,4,5-triol	(2R,3R,4S,5S,6R)-2-[(2R,3S,4R,5R,6R)-6-[(2R,3S,4R,5R,6R)-6-[(2R,3S,4R,5R,6R)-6-[(2R,3S,4R,5R,6R)-4,5-dihydroxy-2-methylol-6-[(2R,3S,4R,5R)-4,5,6-trihydroxy-2-methylol-tetrahydropyran-3-yl]oxy-tetrahydropyran-3-yl]oxy-4,5-dihydroxy-2-methylol-tetrahydropyran-3-yl]oxy-4,5-dihydroxy-2-methylol-tetrahydropyran-3-yl]oxy-4,5-dihydroxy-2-methylol-tetrahydropyran-3-yl]oxy-6-methylol-tetrahydropyran-3,4,5…	InChI=1S/C36H62O31/c37-1-7-13(43)14(44)21(51)32(58-7)64-27-9(3-39)60-34(23(53)16(27)46)66-29-11(5-41)62-36(25(55)18(29)48)67-30-12(6-42)61-35(24(54)19(30)49)65-28-10(4-40)59-33(22(52)17(28)47)63-26-8(2-38)57-31(56)20(50)15(26)45/h7-56H,1-6H2/t7-,8-,9-,10-,11-,12-,13-,14+,15-,16-,17-,18-,19-,20-,21-,22-,23-,24-,25-,26-,27-,28-,29-,30-,31?,32-,33-,34-,35-,36-/m1/s1	OCIBBXPLUVYKCH-LIGGPISVSA-N	-13.300	990.328	C36H62O31	990.900	C(C1C(C(C(C(O1)OC2C(OC(C(C2O)O)OC3C(OC(C(C3O)O)OC4C(OC(C(C4O)O)OC5C(OC(C(C5O)O)OC6C(OC(C(C6O)O)O)CO)CO)CO)CO)CO)O)O)O)O	C([C@@H]1[C@H]([C@@H]([C@H]([C@H](O1)O[C@@H]2[C@H](O[C@@H]([C@@H]([C@H]2O)O)O[C@@H]3[C@H](O[C@@H]([C@@H]([C@H]3O)O)O[C@@H]4[C@H](O[C@@H]([C@@H]([C@H]4O)O)O[C@@H]5[C@H](O[C@@H]([C@@H]([C@H]5O)O)O[C@@H]6[C@H](OC([C@@H]([C@H]6O)O)O)CO)CO)CO)CO)CO)O)O)O)O	506	990.328	0	67	29	1	0	0	0	1	1	1 5 255	32 1 6 36 1 6 34 10 5 35 11 5 38 12 6 40 13 6 45 15 5 46 16 6 47 17 5 50 18 6 33 2 6 44 2 5 56 22 6 57 23 5 60 25 6 62 27 5 64 28 5 39 54 5 37 4 6 42 4 6 41 55 5 48 59 5 49 61 6 58 66 6 63 67 6 65 109 3 43 8 5 53 8 5 51 9 6 52 9 5	TRUE	0	C:\Users\qiang\Documents\Schrodinger\glide-dock_XP_346	glide-dock_XP_346_pv.maegz	1
446495	1818	Structure2D_COMPOUND_CID_446495.1	446495	1	918	21	14	10	AAADcfB4PgAAAAAAAAAAAAAAAAAAAAAAAAAkSJEgAAAAAAAAAAAAGgAACAAACBSwgAMACAAABgAAAAAAAAAAAAAAAAAAAAAAAAAREAIAAAAiQAAFAAAHAAHAYAwAAAAAAAAAAAAAAAAAAAAAAAAAAAAAAA==	(2R,3R,4S,5S,6R)-2-[(2R,3S,4R,5R,6R)-6-[(2R,3S,4R,5R,6R)-4,5-dihydroxy-2-(hydroxymethyl)-6-[(2R,3S,4R,5R,6S)-4,5,6-trihydroxy-2-(hydroxymethyl)tetrahydropyran-3-yl]oxy-tetrahydropyran-3-yl]oxy-4,5-dihydroxy-2-(hydroxymethyl)tetrahydropyran-3-yl]oxy-6-(hydroxymethyl)tetrahydropyran-3,4,5-triol	(2R,3R,4S,5S,6R)-2-[[(2R,3S,4R,5R,6R)-6-[[(2R,3S,4R,5R,6R)-4,5-dihydroxy-2-(hydroxymethyl)-6-[[(2R,3S,4R,5R,6S)-4,5,6-trihydroxy-2-(hydroxymethyl)-3-oxanyl]oxy]-3-oxanyl]oxy]-4,5-dihydroxy-2-(hydroxymethyl)-3-oxanyl]oxy]-6-(hydroxymethyl)oxane-3,4,5-triol	(2<I>R</I>,3<I>R</I>,4<I>S</I>,5<I>S</I>,6<I>R</I>)-2-[(2<I>R</I>,3<I>S</I>,4<I>R</I>,5<I>R</I>,6<I>R</I>)-6-[(2<I>R</I>,3<I>S</I>,4<I>R</I>,5<I>R</I>,6<I>R</I>)-4,5-dihydroxy-2-(hydroxymethyl)-6-[(2<I>R</I>,3<I>S</I>,4<I>R</I>,5<I>R</I>,6<I>S</I>)-4,5,6-trihydroxy-2-(hydroxymethyl)oxan-3-yl]oxyoxan-3-yl]oxy-4,5-dihydroxy-2-(hydroxymethyl)oxan-3-yl]oxy-6-(hydroxymethyl)oxane-3,4,5-triol	(2R,3R,4S,5S,6R)-2-[(2R,3S,4R,5R,6R)-6-[(2R,3S,4R,5R,6R)-4,5-dihydroxy-2-(hydroxymethyl)-6-[(2R,3S,4R,5R,6S)-4,5,6-trihydroxy-2-(hydroxymethyl)oxan-3-yl]oxyoxan-3-yl]oxy-4,5-dihydroxy-2-(hydroxymethyl)oxan-3-yl]oxy-6-(hydroxymethyl)oxane-3,4,5-triol	(2R,3S,4S,5R,6R)-2-(hydroxymethyl)-6-[(2R,3S,4R,5R,6R)-2-(hydroxymethyl)-6-[(2R,3S,4R,5R,6R)-2-(hydroxymethyl)-6-[(2R,3S,4R,5R,6S)-2-(hydroxymethyl)-4,5,6-tris(oxidanyl)oxan-3-yl]oxy-4,5-bis(oxidanyl)oxan-3-yl]oxy-4,5-bis(oxidanyl)oxan-3-yl]oxy-oxane-3,4,5-triol	(2R,3R,4S,5S,6R)-2-[(2R,3S,4R,5R,6R)-6-[(2R,3S,4R,5R,6R)-4,5-dihydroxy-2-methylol-6-[(2R,3S,4R,5R,6S)-4,5,6-trihydroxy-2-methylol-tetrahydropyran-3-yl]oxy-tetrahydropyran-3-yl]oxy-4,5-dihydroxy-2-methylol-tetrahydropyran-3-yl]oxy-6-methylol-tetrahydropyran-3,4,5-triol	InChI=1S/C24H42O21/c25-1-5-9(29)10(30)15(35)22(40-5)44-19-7(3-27)42-24(17(37)12(19)32)45-20-8(4-28)41-23(16(36)13(20)33)43-18-6(2-26)39-21(38)14(34)11(18)31/h5-38H,1-4H2/t5-,6-,7-,8-,9-,10+,11-,12-,13-,14-,15-,16-,17-,18-,19-,20-,21+,22-,23-,24-/m1/s1	LUEWUZLMQUOBSB-ZLBHSGTGSA-N		666.222	C24H42O21	666.600	C(C1C(C(C(C(O1)OC2C(OC(C(C2O)O)OC3C(OC(C(C3O)O)OC4C(OC(C(C4O)O)O)CO)CO)CO)O)O)O)O	C([C@@H]1[C@H]([C@@H]([C@H]([C@H](O1)O[C@@H]2[C@H](O[C@@H]([C@@H]([C@H]2O)O)O[C@@H]3[C@H](O[C@@H]([C@@H]([C@H]3O)O)O[C@@H]4[C@H](O[C@@H]([C@@H]([C@H]4O)O)O)CO)CO)CO)O)O)O)O	348	666.222	0	45	20	0	0	0	0	1	1	1 5 255	22 1 6 26 1 6 27 10 6 29 11 6 34 12 5 35 13 5 37 14 6 38 15 5 41 17 6 43 19 6 28 39 5 30 42 5 36 44 5 23 4 6 33 4 5 40 45 6 31 5 6 32 5 6 24 7 5 25 8 5	TRUE	0	C:\Users\qiang\Documents\Schrodinger\glide-dock_XP_346	glide-dock_XP_346_pv.maegz	1
445937	1819	Structure2D_COMPOUND_CID_445937.1	445937	1	384	11	9	3	AAADceByPAAAAAAAAAAAAAAAAAAAAAAAAAA0QAAAAAAAAAAAAAAAHgAQCAAACDzxgAcACABABgAAAAAAAAAAAAAAAAAAAIAAAAATEAIAgAAjQAAHEAAHAAHwcA0AAAAAAAAAAAACAAAQAACAAAAAAAAAAA==	(1S,2R,4R,5R)-6-[(2R,3R,4R,5S,6R)-3-amino-4,5-dihydroxy-6-(hydroxymethyl)tetrahydropyran-2-yl]oxycyclohexane-1,2,3,4,5-pentol	(1S,2R,4R,5R)-6-[[(2R,3R,4R,5S,6R)-3-amino-4,5-dihydroxy-6-(hydroxymethyl)-2-oxanyl]oxy]cyclohexane-1,2,3,4,5-pentol	(1<I>S</I>,2<I>R</I>,4<I>R</I>,5<I>R</I>)-6-[(2<I>R</I>,3<I>R</I>,4<I>R</I>,5<I>S</I>,6<I>R</I>)-3-amino-4,5-dihydroxy-6-(hydroxymethyl)oxan-2-yl]oxycyclohexane-1,2,3,4,5-pentol	(1S,2R,4R,5R)-6-[(2R,3R,4R,5S,6R)-3-amino-4,5-dihydroxy-6-(hydroxymethyl)oxan-2-yl]oxycyclohexane-1,2,3,4,5-pentol	(1S,2R,4R,5R)-6-[(2R,3R,4R,5S,6R)-3-azanyl-6-(hydroxymethyl)-4,5-bis(oxidanyl)oxan-2-yl]oxycyclohexane-1,2,3,4,5-pentol	(1S,2R,4R,5R)-6-[(2R,3R,4R,5S,6R)-3-amino-4,5-dihydroxy-6-methylol-tetrahydropyran-2-yl]oxycyclohexane-1,2,3,4,5-pentol	InChI=1S/C12H23NO10/c13-3-5(16)4(15)2(1-14)22-12(3)23-11-9(20)7(18)6(17)8(19)10(11)21/h2-12,14-21H,1,13H2/t2-,3-,4-,5-,6?,7-,8-,9-,10+,11?,12-/m1/s1	HEPUIGACZYVUCD-PGVKBZDESA-N	-5.600	341.132	C12H23NO10	341.310	C(C1C(C(C(C(O1)OC2C(C(C(C(C2O)O)O)O)O)N)O)O)O	C([C@@H]1[C@H]([C@@H]([C@H]([C@H](O1)OC2[C@@H]([C@@H](C([C@H]([C@@H]2O)O)O)O)O)N)O)O)O	206	341.132	0	23	9	0	0	0	0	1	-1	1 5 255	18 1 6 19 11 6 22 23 5 13 3 6 14 4 6 15 5 5 16 6 6 20 8 5 21 9 6	TRUE	0	C:\Users\qiang\Documents\Schrodinger\glide-dock_XP_346	glide-dock_XP_346_pv.maegz	1
50909794	1820	Structure2D_COMPOUND_CID_50909794.1	50909794	1	918	21	14	10	AAADcfB4PgAAAAAAAAAAAAAAAAAAAAAAAAAkSJEgAAAAAAAAAAAAGgAACAAACBSwgAMACAAABgAAAAAAAAAAAAAAAAAAAAAAAAAREAIAAAAiQAAFAAAHAAHAYAwAAAAAAAAAAAAAAAAAAAAAAAAAAAAAAA==	(3S,4S,5S,6R)-3-[(2R,3S,4S,5S,6R)-3-[(2R,3S,4S,5R,6R)-3,5-dihydroxy-6-(hydroxymethyl)-4-[(2R,3S,4S,5S,6R)-3,4,5-trihydroxy-6-(hydroxymethyl)tetrahydropyran-2-yl]oxy-tetrahydropyran-2-yl]oxy-4,5-dihydroxy-6-(hydroxymethyl)tetrahydropyran-2-yl]oxy-6-(hydroxymethyl)tetrahydropyran-2,4,5-triol	(3S,4S,5S,6R)-3-[[(2R,3S,4S,5S,6R)-3-[[(2R,3S,4S,5R,6R)-3,5-dihydroxy-6-(hydroxymethyl)-4-[[(2R,3S,4S,5S,6R)-3,4,5-trihydroxy-6-(hydroxymethyl)-2-oxanyl]oxy]-2-oxanyl]oxy]-4,5-dihydroxy-6-(hydroxymethyl)-2-oxanyl]oxy]-6-(hydroxymethyl)oxane-2,4,5-triol	(3<I>S</I>,4<I>S</I>,5<I>S</I>,6<I>R</I>)-3-[(2<I>R</I>,3<I>S</I>,4<I>S</I>,5<I>S</I>,6<I>R</I>)-3-[(2<I>R</I>,3<I>S</I>,4<I>S</I>,5<I>R</I>,6<I>R</I>)-3,5-dihydroxy-6-(hydroxymethyl)-4-[(2<I>R</I>,3<I>S</I>,4<I>S</I>,5<I>S</I>,6<I>R</I>)-3,4,5-trihydroxy-6-(hydroxymethyl)oxan-2-yl]oxyoxan-2-yl]oxy-4,5-dihydroxy-6-(hydroxymethyl)oxan-2-yl]oxy-6-(hydroxymethyl)oxane-2,4,5-triol	(3S,4S,5S,6R)-3-[(2R,3S,4S,5S,6R)-3-[(2R,3S,4S,5R,6R)-3,5-dihydroxy-6-(hydroxymethyl)-4-[(2R,3S,4S,5S,6R)-3,4,5-trihydroxy-6-(hydroxymethyl)oxan-2-yl]oxyoxan-2-yl]oxy-4,5-dihydroxy-6-(hydroxymethyl)oxan-2-yl]oxy-6-(hydroxymethyl)oxane-2,4,5-triol	(3S,4S,5S,6R)-6-(hydroxymethyl)-3-[(2R,3S,4S,5S,6R)-6-(hydroxymethyl)-3-[(2R,3S,4S,5R,6R)-6-(hydroxymethyl)-4-[(2R,3S,4S,5S,6R)-6-(hydroxymethyl)-3,4,5-tris(oxidanyl)oxan-2-yl]oxy-3,5-bis(oxidanyl)oxan-2-yl]oxy-4,5-bis(oxidanyl)oxan-2-yl]oxy-oxane-2,4,5-triol	(3S,4S,5S,6R)-3-[(2R,3S,4S,5S,6R)-3-[(2R,3S,4S,5R,6R)-3,5-dihydroxy-6-methylol-4-[(2R,3S,4S,5S,6R)-3,4,5-trihydroxy-6-methylol-tetrahydropyran-2-yl]oxy-tetrahydropyran-2-yl]oxy-4,5-dihydroxy-6-methylol-tetrahydropyran-2-yl]oxy-6-methylol-tetrahydropyran-2,4,5-triol	InChI=1S/C24H42O21/c25-1-5-10(30)14(34)19(21(38)39-5)44-24-20(15(35)11(31)7(3-27)42-24)45-23-17(37)18(12(32)8(4-28)41-23)43-22-16(36)13(33)9(29)6(2-26)40-22/h5-38H,1-4H2/t5-,6-,7-,8-,9-,10-,11-,12-,13+,14+,15+,16+,17+,18+,19+,20+,21?,22-,23-,24-/m1/s1	NXPDEZAEUSDDQF-SHOVVSDRSA-N	-7.400	666.222	C24H42O21	666.600	C(C1C(C(C(C(O1)O)OC2C(C(C(C(O2)CO)O)O)OC3C(C(C(C(O3)CO)O)OC4C(C(C(C(O4)CO)O)O)O)O)O)O)O	C([C@@H]1[C@H]([C@@H]([C@@H]([C@H](O1)O[C@H]2[C@@H]([C@H](O[C@@H]([C@H]2O)O[C@H]3[C@H]([C@@H]([C@H](O[C@@H]3O[C@H]4[C@H]([C@@H]([C@H](OC4O)CO)O)O)CO)O)O)CO)O)O)O)O)O	348	666.222	0	45	19	1	0	0	0	1	-1	1 5 255	22 1 5 25 1 6 28 10 6 29 11 6 34 12 6 35 13 5 36 14 5 37 15 5 38 16 6 39 17 3 23 3 5 33 3 6 30 42 5 31 43 5 40 44 5 41 45 6 27 5 6 32 5 6 24 7 5 26 9 5	TRUE	0	C:\Users\qiang\Documents\Schrodinger\glide-dock_XP_346	glide-dock_XP_346_pv.maegz	1
94448	1821	Structure2D_COMPOUND_CID_94448 (1).1	94448	1	625	16	11	11	AAADcfB4PgAAAAAAAAAAAAAAAAAAAAAAAAAkSAAAAAAAAAAAAAAAGgAACAAACBSwgAMACAAABgAIAAgQgAIAAAAAAAAAAAFAAAAREBYAAAAiQAAFIAAHAAHKbAxAAAAAAAAAAAAAAAAAAAAAAAAAAAAAAA==	(2R,3R,4R,5R)-2,3,5,6-tetrahydroxy-4-[(2R,3R,4S,5S,6R)-3,4,5-trihydroxy-6-[[(2S,3R,4S,5S,6R)-3,4,5-trihydroxy-6-(hydroxymethyl)tetrahydropyran-2-yl]oxymethyl]tetrahydropyran-2-yl]oxy-hexanal	(2R,3R,4R,5R)-2,3,5,6-tetrahydroxy-4-[[(2R,3R,4S,5S,6R)-3,4,5-trihydroxy-6-[[(2S,3R,4S,5S,6R)-3,4,5-trihydroxy-6-(hydroxymethyl)-2-oxanyl]oxymethyl]-2-oxanyl]oxy]hexanal	(2<I>R</I>,3<I>R</I>,4<I>R</I>,5<I>R</I>)-2,3,5,6-tetrahydroxy-4-[(2<I>R</I>,3<I>R</I>,4<I>S</I>,5<I>S</I>,6<I>R</I>)-3,4,5-trihydroxy-6-[[(2<I>S</I>,3<I>R</I>,4<I>S</I>,5<I>S</I>,6<I>R</I>)-3,4,5-trihydroxy-6-(hydroxymethyl)oxan-2-yl]oxymethyl]oxan-2-yl]oxyhexanal	(2R,3R,4R,5R)-2,3,5,6-tetrahydroxy-4-[(2R,3R,4S,5S,6R)-3,4,5-trihydroxy-6-[[(2S,3R,4S,5S,6R)-3,4,5-trihydroxy-6-(hydroxymethyl)oxan-2-yl]oxymethyl]oxan-2-yl]oxyhexanal	(2R,3R,4R,5R)-4-[(2R,3R,4S,5S,6R)-6-[[(2S,3R,4S,5S,6R)-6-(hydroxymethyl)-3,4,5-tris(oxidanyl)oxan-2-yl]oxymethyl]-3,4,5-tris(oxidanyl)oxan-2-yl]oxy-2,3,5,6-tetrakis(oxidanyl)hexanal	(2R,3R,4R,5R)-2,3,5,6-tetrahydroxy-4-[(2R,3R,4S,5S,6R)-3,4,5-trihydroxy-6-[[(2S,3R,4S,5S,6R)-3,4,5-trihydroxy-6-methylol-tetrahydropyran-2-yl]oxymethyl]tetrahydropyran-2-yl]oxy-hexanal	InChI=1S/C18H32O16/c19-1-5(22)9(24)16(6(23)2-20)34-18-15(30)13(28)11(26)8(33-18)4-31-17-14(29)12(27)10(25)7(3-21)32-17/h1,5-18,20-30H,2-4H2/t5-,6+,7+,8+,9+,10+,11+,12-,13-,14+,15+,16+,17-,18+/m0/s1	ZCLAHGAZPPEVDX-MQHGYYCBSA-N	-7.200	504.169	C18H32O16	504.400	C(C1C(C(C(C(O1)OCC2C(C(C(C(O2)OC(C(CO)O)C(C(C=O)O)O)O)O)O)O)O)O)O	C([C@@H]1[C@H]([C@@H]([C@H]([C@H](O1)OC[C@@H]2[C@H]([C@@H]([C@H]([C@H](O2)O[C@H]([C@@H](CO)O)[C@@H]([C@H](C=O)O)O)O)O)O)O)O)O)O	277	504.169	0	34	14	0	0	0	0	1	-1	1 5 255	26 10 5 29 11 5 30 12 6 32 14 5 17 24 5 22 2 5 27 31 6 21 3 6 28 3 6 18 5 6 19 6 5 20 7 6 23 8 5 25 9 6	TRUE	0	C:\Users\qiang\Documents\Schrodinger\glide-dock_XP_346	glide-dock_XP_346_pv.maegz	1
94448	1822	Structure2D_COMPOUND_CID_94448.1	94448	1	625	16	11	11	AAADcfB4PgAAAAAAAAAAAAAAAAAAAAAAAAAkSAAAAAAAAAAAAAAAGgAACAAACBSwgAMACAAABgAIAAgQgAIAAAAAAAAAAAFAAAAREBYAAAAiQAAFIAAHAAHKbAxAAAAAAAAAAAAAAAAAAAAAAAAAAAAAAA==	(2R,3R,4R,5R)-2,3,5,6-tetrahydroxy-4-[(2R,3R,4S,5S,6R)-3,4,5-trihydroxy-6-[[(2S,3R,4S,5S,6R)-3,4,5-trihydroxy-6-(hydroxymethyl)tetrahydropyran-2-yl]oxymethyl]tetrahydropyran-2-yl]oxy-hexanal	(2R,3R,4R,5R)-2,3,5,6-tetrahydroxy-4-[[(2R,3R,4S,5S,6R)-3,4,5-trihydroxy-6-[[(2S,3R,4S,5S,6R)-3,4,5-trihydroxy-6-(hydroxymethyl)-2-oxanyl]oxymethyl]-2-oxanyl]oxy]hexanal	(2<I>R</I>,3<I>R</I>,4<I>R</I>,5<I>R</I>)-2,3,5,6-tetrahydroxy-4-[(2<I>R</I>,3<I>R</I>,4<I>S</I>,5<I>S</I>,6<I>R</I>)-3,4,5-trihydroxy-6-[[(2<I>S</I>,3<I>R</I>,4<I>S</I>,5<I>S</I>,6<I>R</I>)-3,4,5-trihydroxy-6-(hydroxymethyl)oxan-2-yl]oxymethyl]oxan-2-yl]oxyhexanal	(2R,3R,4R,5R)-2,3,5,6-tetrahydroxy-4-[(2R,3R,4S,5S,6R)-3,4,5-trihydroxy-6-[[(2S,3R,4S,5S,6R)-3,4,5-trihydroxy-6-(hydroxymethyl)oxan-2-yl]oxymethyl]oxan-2-yl]oxyhexanal	(2R,3R,4R,5R)-4-[(2R,3R,4S,5S,6R)-6-[[(2S,3R,4S,5S,6R)-6-(hydroxymethyl)-3,4,5-tris(oxidanyl)oxan-2-yl]oxymethyl]-3,4,5-tris(oxidanyl)oxan-2-yl]oxy-2,3,5,6-tetrakis(oxidanyl)hexanal	(2R,3R,4R,5R)-2,3,5,6-tetrahydroxy-4-[(2R,3R,4S,5S,6R)-3,4,5-trihydroxy-6-[[(2S,3R,4S,5S,6R)-3,4,5-trihydroxy-6-methylol-tetrahydropyran-2-yl]oxymethyl]tetrahydropyran-2-yl]oxy-hexanal	InChI=1S/C18H32O16/c19-1-5(22)9(24)16(6(23)2-20)34-18-15(30)13(28)11(26)8(33-18)4-31-17-14(29)12(27)10(25)7(3-21)32-17/h1,5-18,20-30H,2-4H2/t5-,6+,7+,8+,9+,10+,11+,12-,13-,14+,15+,16+,17-,18+/m0/s1	ZCLAHGAZPPEVDX-MQHGYYCBSA-N	-7.200	504.169	C18H32O16	504.400	C(C1C(C(C(C(O1)OCC2C(C(C(C(O2)OC(C(CO)O)C(C(C=O)O)O)O)O)O)O)O)O)O	C([C@@H]1[C@H]([C@@H]([C@H]([C@H](O1)OC[C@@H]2[C@H]([C@@H]([C@H]([C@H](O2)O[C@H]([C@@H](CO)O)[C@@H]([C@H](C=O)O)O)O)O)O)O)O)O)O	277	504.169	0	34	14	0	0	0	0	1	-1	1 5 255	26 10 5 29 11 5 30 12 6 32 14 5 17 24 5 22 2 5 27 31 6 21 3 6 28 3 6 18 5 6 19 6 5 20 7 6 23 8 5 25 9 6	TRUE	0	C:\Users\qiang\Documents\Schrodinger\glide-dock_XP_346	glide-dock_XP_346_pv.maegz	1
101039148	1823	Structure2D_COMPOUND_CID_101039148.1	101039148	1	401	8	6	7	AAADceByOAAAAAAAAAAAAAAAAAAAASAAAAAwAAAAAAAAAAABAAAAHgAQCAAADDzhmAYwCILABgCIAiDSCAACAAAgAAAIiIGIAIgbMDKAkTGHYAAnkACfiAf4+KaOAAAAAAAAAAAAAAAAAAAAAAAAAAAAAA==	(2S)-3-phenyl-2-[[(3S,4S,5R)-2,3,4-trihydroxy-5-(hydroxymethyl)tetrahydrofuran-2-yl]methylamino]propanoic acid	(2S)-3-phenyl-2-[[(3S,4S,5R)-2,3,4-trihydroxy-5-(hydroxymethyl)-2-oxolanyl]methylamino]propanoic acid	(2<I>S</I>)-3-phenyl-2-[[(3<I>S</I>,4<I>S</I>,5<I>R</I>)-2,3,4-trihydroxy-5-(hydroxymethyl)oxolan-2-yl]methylamino]propanoic acid	(2S)-3-phenyl-2-[[(3S,4S,5R)-2,3,4-trihydroxy-5-(hydroxymethyl)oxolan-2-yl]methylamino]propanoic acid	(2S)-2-[[(3S,4S,5R)-5-(hydroxymethyl)-2,3,4-tris(oxidanyl)oxolan-2-yl]methylamino]-3-phenyl-propanoic acid	(2S)-3-phenyl-2-[[(3S,4S,5R)-2,3,4-trihydroxy-5-methylol-tetrahydrofuran-2-yl]methylamino]propionic acid	InChI=1S/C15H21NO7/c17-7-11-12(18)13(19)15(22,23-11)8-16-10(14(20)21)6-9-4-2-1-3-5-9/h1-5,10-13,16-19,22H,6-8H2,(H,20,21)/t10-,11+,12+,13-,15?/m0/s1	FAVRCIXPIVJIPN-VJDSNFAGSA-N	-2.700	327.132	C15H21NO7	327.330	C1=CC=C(C=C1)CC(C(=O)O)NCC2(C(C(C(O2)CO)O)O)O	C1=CC=C(C=C1)C[C@@H](C(=O)O)NCC2([C@H]([C@@H]([C@H](O2)CO)O)O)O	140	327.132	0	23	4	1	0	0	0	1	-1	1 5 255	12 14 6 18 19 8 18 20 8 19 21 8 20 22 8 21 23 8 22 23 8 10 3 6 11 4 5 15 8 6 9 13 3	TRUE	0	C:\Users\qiang\Documents\Schrodinger\glide-dock_XP_346	glide-dock_XP_346_pv.maegz	1
44258591	1824	Structure2D_COMPOUND_CID_44258591.1	44258591	1	745	12	8	4	AAADceB4PAAAAAAAAAAAAAAAAAAAAAAAAAA0YIEAAAAAAACBQAAAGgAACAAADBSwmAMwDoAABgCIAqBSAAACCAAkIAAIiAEGiMgdNzaGNRqieWOl4BUPuQfK7LzOIQABCAAIQABCAAIQABCAAAAAAAAAAA==	2-(3,4-dihydroxyphenyl)-5,7-dihydroxy-8-[(2S,4S,5S)-3,4,5-trihydroxy-6-(hydroxymethyl)tetrahydropyran-2-yl]oxy-chromen-4-one	2-(3,4-dihydroxyphenyl)-5,7-dihydroxy-8-[[(2S,4S,5S)-3,4,5-trihydroxy-6-(hydroxymethyl)-2-oxanyl]oxy]-1-benzopyran-4-one	2-(3,4-dihydroxyphenyl)-5,7-dihydroxy-8-[(2<I>S</I>,4<I>S</I>,5<I>S</I>)-3,4,5-trihydroxy-6-(hydroxymethyl)oxan-2-yl]oxychromen-4-one	2-(3,4-dihydroxyphenyl)-5,7-dihydroxy-8-[(2S,4S,5S)-3,4,5-trihydroxy-6-(hydroxymethyl)oxan-2-yl]oxychromen-4-one	2-[3,4-bis(oxidanyl)phenyl]-8-[(2S,4S,5S)-6-(hydroxymethyl)-3,4,5-tris(oxidanyl)oxan-2-yl]oxy-5,7-bis(oxidanyl)chromen-4-one	2-(3,4-dihydroxyphenyl)-5,7-dihydroxy-8-[(2S,4S,5S)-3,4,5-trihydroxy-6-methylol-tetrahydropyran-2-yl]oxy-chromone	InChI=1S/C21H20O12/c22-6-14-16(28)17(29)18(30)21(32-14)33-19-12(27)4-10(25)15-11(26)5-13(31-20(15)19)7-1-2-8(23)9(24)3-7/h1-5,14,16-18,21-25,27-30H,6H2/t14?,16-,17+,18?,21+/m1/s1	LQSNPVIQIPKOGP-SYJRICELSA-N	0.200	464.095	C21H20O12	464.400	C1=CC(=C(C=C1C2=CC(=O)C3=C(O2)C(=C(C=C3O)O)OC4C(C(C(C(O4)CO)O)O)O)O)O	C1=CC(=C(C=C1C2=CC(=O)C3=C(O2)C(=C(C=C3O)O)O[C@H]4C([C@H]([C@@H](C(O4)CO)O)O)O)O)O	207	464.095	0	33	3	2	0	0	0	1	-1	1 5 255	16 18 3 19 20 8 19 21 8 17 2 5 20 22 8 21 24 8 22 23 8 22 25 8 23 24 8 25 27 8 26 27 8 28 29 8 28 30 8 29 31 8 13 3 5 30 32 8 31 33 8 32 33 8 14 4 6 15 5 3 7 20 8 7 26 8	TRUE	0	C:\Users\qiang\Documents\Schrodinger\glide-dock_XP_346	glide-dock_XP_346_pv.maegz	1
443363	1825	Structure2D_COMPOUND_CID_443363.1	443363	1	847	9	7	16	AAADcfB7uABAAAAAAAAAAAAAAAAAAAAAAAAwYAAAAAAAAAABQAAAHgQQCAAADCzF2ASyDoLAAgiIAiHSGAACAAAgIBAIiIGOCIgKZjKikTOUcAAk1hGYmAeYyKCOIAAAAAAAAABAAAAAAAAAAAAAAAAAAA==	(2S)-2-[[(2S)-2-[[2-[[2-[[(2S)-2-amino-3-(4-hydroxyphenyl)propanoyl]amino]acetyl]amino]acetyl]amino]-3-phenyl-propanoyl]amino]-4-methylsulfanyl-butanoic acid	(2S)-2-[[(2S)-2-[[2-[[2-[[(2S)-2-amino-3-(4-hydroxyphenyl)-1-oxopropyl]amino]-1-oxoethyl]amino]-1-oxoethyl]amino]-1-oxo-3-phenylpropyl]amino]-4-(methylthio)butanoic acid	(2<I>S</I>)-2-[[(2<I>S</I>)-2-[[2-[[2-[[(2<I>S</I>)-2-amino-3-(4-hydroxyphenyl)propanoyl]amino]acetyl]amino]acetyl]amino]-3-phenylpropanoyl]amino]-4-methylsulfanylbutanoic acid	(2S)-2-[[(2S)-2-[[2-[[2-[[(2S)-2-amino-3-(4-hydroxyphenyl)propanoyl]amino]acetyl]amino]acetyl]amino]-3-phenylpropanoyl]amino]-4-methylsulfanylbutanoic acid	(2S)-2-[[(2S)-2-[2-[2-[[(2S)-2-azanyl-3-(4-hydroxyphenyl)propanoyl]amino]ethanoylamino]ethanoylamino]-3-phenyl-propanoyl]amino]-4-methylsulfanyl-butanoic acid	(2S)-2-[[(2S)-2-[[2-[[2-[[(2S)-2-amino-3-(4-hydroxyphenyl)propanoyl]amino]acetyl]amino]acetyl]amino]-3-phenyl-propanoyl]amino]-4-(methylthio)butyric acid	InChI=1S/C27H35N5O7S/c1-40-12-11-21(27(38)39)32-26(37)22(14-17-5-3-2-4-6-17)31-24(35)16-29-23(34)15-30-25(36)20(28)13-18-7-9-19(33)10-8-18/h2-10,20-22,33H,11-16,28H2,1H3,(H,29,34)(H,30,36)(H,31,35)(H,32,37)(H,38,39)/t20-,21-,22-/m0/s1	YFGBQHOOROIVKG-FKBYEOEOSA-N		573.226	C27H35N5O7S	573.700	CSCCC(C(=O)O)NC(=O)C(CC1=CC=CC=C1)NC(=O)CNC(=O)CNC(=O)C(CC2=CC=C(C=C2)O)N	CSCC[C@@H](C(=O)O)NC(=O)[C@H](CC1=CC=CC=C1)NC(=O)CNC(=O)CNC(=O)[C@H](CC2=CC=C(C=C2)O)N	225	573.226	0	40	3	0	0	0	0	1	32	1 5 255	14 10 5 23 13 5 19 24 8 19 25 8 24 30 8 25 31 8 28 35 8 28 36 8 30 33 8 31 33 8 35 37 8 36 38 8 37 40 8 38 40 8 16 9 5	TRUE	0	C:\Users\qiang\Documents\Schrodinger\glide-dock_XP_346	glide-dock_XP_346_pv.maegz	1
73981596	1826	Structure2D_COMPOUND_CID_73981596.1	73981596	1	622	13	7	14	AAADcfB4PAAAAAAAAAAAAAAAAAAAAAAAAAAkSAAAAAAAAAAAAAAAGgAACAAACBSwgAMCCAAABgAIAACQCAAAAAAAAAAAAAEAAAAREBYAAAAiQAAFIAAHAAHI6KyAAAAAAAAAAAAAAAAAAAAAAAAAAAAAAA==	ethyl 3-[3,4,5-trihydroxy-6-[[3,4,5-trihydroxy-6-(hydroxymethyl)tetrahydropyran-2-yl]oxymethyl]tetrahydropyran-2-yl]oxyoctanoate	3-[[3,4,5-trihydroxy-6-[[3,4,5-trihydroxy-6-(hydroxymethyl)-2-oxanyl]oxymethyl]-2-oxanyl]oxy]octanoic acid ethyl ester	ethyl 3-[3,4,5-trihydroxy-6-[[3,4,5-trihydroxy-6-(hydroxymethyl)oxan-2-yl]oxymethyl]oxan-2-yl]oxyoctanoate	ethyl 3-[3,4,5-trihydroxy-6-[[3,4,5-trihydroxy-6-(hydroxymethyl)oxan-2-yl]oxymethyl]oxan-2-yl]oxyoctanoate	ethyl 3-[6-[[6-(hydroxymethyl)-3,4,5-tris(oxidanyl)oxan-2-yl]oxymethyl]-3,4,5-tris(oxidanyl)oxan-2-yl]oxyoctanoate	3-[3,4,5-trihydroxy-6-[(3,4,5-trihydroxy-6-methylol-tetrahydropyran-2-yl)oxymethyl]tetrahydropyran-2-yl]oxycaprylic acid ethyl ester	InChI=1S/C22H40O13/c1-3-5-6-7-11(8-14(24)31-4-2)33-22-20(30)18(28)16(26)13(35-22)10-32-21-19(29)17(27)15(25)12(9-23)34-21/h11-13,15-23,25-30H,3-10H2,1-2H3	QAIPLYVRKVVKMO-UHFFFAOYSA-N	-1.600	512.247	C22H40O13	512.500	CCCCCC(CC(=O)OCC)OC1C(C(C(C(O1)COC2C(C(C(C(O2)CO)O)O)O)O)O)O	CCCCCC(CC(=O)OCC)OC1C(C(C(C(O1)COC2C(C(C(C(O2)CO)O)O)O)O)O)O	205	512.247	0	35	0	11	0	0	0	1	-1	1 5 255	23 10 3 14 22 3 19 2 3 24 26 3 25 27 3 18 4 3 15 5 3 16 6 3 17 7 3 20 8 3 21 9 3	TRUE	0	C:\Users\qiang\Documents\Schrodinger\glide-dock_XP_346	glide-dock_XP_346_pv.maegz	1
44258423	1827	Structure2D_COMPOUND_CID_44258423.1	44258423	1	706	11	7	4	AAADceB4PAAAAAAAAAAAAAAAAAAAAAAAAAA0YIEAAAAAAACBQAAAGgAACAAADBSwmAMwDoAABgCIAqBSAAACCAAkIAAIiAEGiMgdNzaGNRqieWOl4BUPuQfK7LzOIQABCAAIQABCAAIQABCAAAAAAAAAAA==	5,6-dihydroxy-2-(4-hydroxyphenyl)-7-[(2S,4S,5S)-3,4,5-trihydroxy-6-(hydroxymethyl)tetrahydropyran-2-yl]oxy-chromen-4-one	5,6-dihydroxy-2-(4-hydroxyphenyl)-7-[[(2S,4S,5S)-3,4,5-trihydroxy-6-(hydroxymethyl)-2-oxanyl]oxy]-1-benzopyran-4-one	5,6-dihydroxy-2-(4-hydroxyphenyl)-7-[(2<I>S</I>,4<I>S</I>,5<I>S</I>)-3,4,5-trihydroxy-6-(hydroxymethyl)oxan-2-yl]oxychromen-4-one	5,6-dihydroxy-2-(4-hydroxyphenyl)-7-[(2S,4S,5S)-3,4,5-trihydroxy-6-(hydroxymethyl)oxan-2-yl]oxychromen-4-one	7-[(2S,4S,5S)-6-(hydroxymethyl)-3,4,5-tris(oxidanyl)oxan-2-yl]oxy-2-(4-hydroxyphenyl)-5,6-bis(oxidanyl)chromen-4-one	5,6-dihydroxy-2-(4-hydroxyphenyl)-7-[(2S,4S,5S)-3,4,5-trihydroxy-6-methylol-tetrahydropyran-2-yl]oxy-chromone	InChI=1S/C21H20O11/c22-7-14-17(26)19(28)20(29)21(32-14)31-13-6-12-15(18(27)16(13)25)10(24)5-11(30-12)8-1-3-9(23)4-2-8/h1-6,14,17,19-23,25-29H,7H2/t14?,17-,19+,20?,21-/m1/s1	VUGRLRAUZWGZJP-DIVKWIOBSA-N	0.500	448.101	C21H20O11	448.400	C1=CC(=CC=C1C2=CC(=O)C3=C(C(=C(C=C3O2)OC4C(C(C(C(O4)CO)O)O)O)O)O)O	C1=CC(=CC=C1C2=CC(=O)C3=C(C(=C(C=C3O2)O[C@H]4C([C@H]([C@@H](C(O4)CO)O)O)O)O)O)O	186	448.101	0	32	3	2	0	0	0	1	-1	1 5 255	15 17 3 18 19 8 18 20 8 19 21 8 16 2 5 20 23 8 21 22 8 22 23 8 22 24 8 24 26 8 25 26 8 27 28 8 27 29 8 28 30 8 29 31 8 12 3 5 30 32 8 31 32 8 13 4 6 14 5 3 7 21 8 7 25 8	TRUE	0	C:\Users\qiang\Documents\Schrodinger\glide-dock_XP_346	glide-dock_XP_346_pv.maegz	1
67309075	1828	Structure2D_COMPOUND_CID_67309075.1	67309075	1	604	7	6	12	AAADceB7uAAAAAAAAAAAAAAAAAAAAAAAAAAwAAAAAAAAAAABAAAAHgAQCAAADSzBmAQyDoLAAgCIAiHSGAACAAAgIAAIiIGOCIgKZjKCkTOUcAAk1hGYmAecy6COIAAAAAAAAABAAAAAAAAAAAAAAAAAAA==	(2S)-2-[[(2S)-2-[[(2S)-2,5-diamino-5-oxo-pentanoyl]amino]-3-(4-hydroxyphenyl)propanoyl]amino]-4-methyl-pentanoic acid	(2S)-2-[[(2S)-2-[[(2S)-2,5-diamino-1,5-dioxopentyl]amino]-3-(4-hydroxyphenyl)-1-oxopropyl]amino]-4-methylpentanoic acid	(2<I>S</I>)-2-[[(2<I>S</I>)-2-[[(2<I>S</I>)-2,5-diamino-5-oxopentanoyl]amino]-3-(4-hydroxyphenyl)propanoyl]amino]-4-methylpentanoic acid	(2S)-2-[[(2S)-2-[[(2S)-2,5-diamino-5-oxopentanoyl]amino]-3-(4-hydroxyphenyl)propanoyl]amino]-4-methylpentanoic acid	(2S)-2-[[(2S)-2-[[(2S)-2,5-bis(azanyl)-5-oxidanylidene-pentanoyl]amino]-3-(4-hydroxyphenyl)propanoyl]amino]-4-methyl-pentanoic acid	(2S)-2-[[(2S)-2-[[(2S)-2,5-diamino-5-keto-pentanoyl]amino]-3-(4-hydroxyphenyl)propanoyl]amino]-4-methyl-valeric acid	InChI=1S/C20H30N4O6/c1-11(2)9-16(20(29)30)24-19(28)15(10-12-3-5-13(25)6-4-12)23-18(27)14(21)7-8-17(22)26/h3-6,11,14-16,25H,7-10,21H2,1-2H3,(H2,22,26)(H,23,27)(H,24,28)(H,29,30)/t14-,15-,16-/m0/s1	JKDBRTNMYXYLHO-JYJNAYRXSA-N		422.217	C20H30N4O6	422.500	CC(C)CC(C(=O)O)NC(=O)C(CC1=CC=C(C=C1)O)NC(=O)C(CCC(=O)N)N	CC(C)C[C@@H](C(=O)O)NC(=O)[C@H](CC1=CC=C(C=C1)O)NC(=O)[C@H](CCC(=O)N)N	185	422.217	0	30	3	0	0	0	0	1	-1	1 5 255	21 25 8 21 26 8 25 27 8 26 28 8 27 30 8 28 30 8 12 7 6 14 8 5 19 9 5	TRUE	0	C:\Users\qiang\Documents\Schrodinger\glide-dock_XP_346	glide-dock_XP_346_pv.maegz	1
145457927	1829	Structure2D_COMPOUND_CID_145457927.1	145457927	1	439	7	6	9	AAADceBzuAAAAAAAAAAAAAAAAAAAAAAAAAAAAAAAAAAAAAAAAAAAHgAQCAAADSjhgAYCCALAAgAIAAGQGAAAAAAAAAAAAIGIAAACUBwAwCAUQAAGNgCQAAAnAAAIAAAAAAAAAAAAAAAAAAAAAAAAAAAAAA==	(2S)-4-amino-2-[[(2S)-2-[[(2S)-2-amino-3-hydroxy-propanoyl]amino]-3-methyl-butanoyl]amino]-4-oxo-butanoic acid	(2S)-4-amino-2-[[(2S)-2-[[(2S)-2-amino-3-hydroxy-1-oxopropyl]amino]-3-methyl-1-oxobutyl]amino]-4-oxobutanoic acid	(2<I>S</I>)-4-amino-2-[[(2<I>S</I>)-2-[[(2<I>S</I>)-2-amino-3-hydroxypropanoyl]amino]-3-methylbutanoyl]amino]-4-oxobutanoic acid	(2S)-4-amino-2-[[(2S)-2-[[(2S)-2-amino-3-hydroxypropanoyl]amino]-3-methylbutanoyl]amino]-4-oxobutanoic acid	(2S)-4-azanyl-2-[[(2S)-2-[[(2S)-2-azanyl-3-oxidanyl-propanoyl]amino]-3-methyl-butanoyl]amino]-4-oxidanylidene-butanoic acid	(2S)-4-amino-2-[[(2S)-2-[[(2S)-2-amino-3-hydroxy-propanoyl]amino]-3-methyl-butanoyl]amino]-4-keto-butyric acid	InChI=1S/C12H22N4O6/c1-5(2)9(16-10(19)6(13)4-17)11(20)15-7(12(21)22)3-8(14)18/h5-7,9,17H,3-4,13H2,1-2H3,(H2,14,18)(H,15,20)(H,16,19)(H,21,22)/t6-,7-,9-/m0/s1	PCMZJFMUYWIERL-ZKWXMUAHSA-N		318.154	C12H22N4O6	318.330	CC(C)C(C(=O)NC(CC(=O)N)C(=O)O)NC(=O)C(CO)N	CC(C)[C@@H](C(=O)N[C@@H](CC(=O)N)C(=O)O)NC(=O)[C@H](CO)N	185	318.154	0	22	3	0	0	0	0	1	-1	1 5 255	11 7 6 16 8 5 18 9 5	TRUE	0	C:\Users\qiang\Documents\Schrodinger\glide-dock_XP_346	glide-dock_XP_346_pv.maegz	1
6441498	1830	Structure2D_COMPOUND_CID_6441498.1	6441498	1	922	12	7	9	AAADceB4PAAAAAAAAAAAAAAAAAAAASAAAAAwYMAAAAAAAEgBUAAAGgAACAAADRSgmAIwDoAABgCIAiDSCAICCAAgIAAIiAFGiMgNJjaGNR6CeCOl4BELuYfK7PzOoAABAAAYQABAAAIAADCAAAAAAAAAAA==	(2S,3S)-4-[(E)-3-[(1R)-1-carboxy-2-(3,4-dihydroxyphenyl)ethoxy]-3-oxo-prop-1-enyl]-2-(3,4-dihydroxyphenyl)-7-hydroxy-2,3-dihydrobenzofuran-3-carboxylic acid	(2S,3S)-4-[(E)-3-[(1R)-1-carboxy-2-(3,4-dihydroxyphenyl)ethoxy]-3-oxoprop-1-enyl]-2-(3,4-dihydroxyphenyl)-7-hydroxy-2,3-dihydrobenzofuran-3-carboxylic acid	(2<I>S</I>,3<I>S</I>)-4-[(<I>E</I>)-3-[(1<I>R</I>)-1-carboxy-2-(3,4-dihydroxyphenyl)ethoxy]-3-oxoprop-1-enyl]-2-(3,4-dihydroxyphenyl)-7-hydroxy-2,3-dihydro-1-benzofuran-3-carboxylic acid	(2S,3S)-4-[(E)-3-[(1R)-1-carboxy-2-(3,4-dihydroxyphenyl)ethoxy]-3-oxoprop-1-enyl]-2-(3,4-dihydroxyphenyl)-7-hydroxy-2,3-dihydro-1-benzofuran-3-carboxylic acid	(2S,3S)-2-[3,4-bis(oxidanyl)phenyl]-4-[(E)-3-[(2R)-3-[3,4-bis(oxidanyl)phenyl]-1-oxidanyl-1-oxidanylidene-propan-2-yl]oxy-3-oxidanylidene-prop-1-enyl]-7-oxidanyl-2,3-dihydro-1-benzofuran-3-carboxylic acid	(2S,3S)-4-[(E)-3-[(1R)-1-carboxy-2-(3,4-dihydroxyphenyl)ethoxy]-3-keto-prop-1-enyl]-2-(3,4-dihydroxyphenyl)-7-hydroxy-coumaran-3-carboxylic acid	InChI=1S/C27H22O12/c28-15-5-1-12(9-18(15)31)10-20(26(34)35)38-21(33)8-4-13-2-7-17(30)25-22(13)23(27(36)37)24(39-25)14-3-6-16(29)19(32)11-14/h1-9,11,20,23-24,28-32H,10H2,(H,34,35)(H,36,37)/b8-4+/t20-,23+,24-/m1/s1	UJZQBMQZMKFSRV-RGKBJLTCSA-N	2.800	538.111	C27H22O12	538.500	C1=CC(=C(C=C1CC(C(=O)O)OC(=O)C=CC2=C3C(C(OC3=C(C=C2)O)C4=CC(=C(C=C4)O)O)C(=O)O)O)O	C1=CC(=C(C=C1C[C@H](C(=O)O)OC(=O)/C=C/C2=C3[C@@H]([C@H](OC3=C(C=C2)O)C4=CC(=C(C=C4)O)O)C(=O)O)O)O	211	538.111	0	39	3	0	1	0	0	1	994	1 5 255	13 19 6 14 17 5 15 16 8 15 18 8 16 20 8 17 22 8 17 23 8 18 21 8 20 24 8 21 24 8 22 26 8 23 27 8 26 28 8 27 28 8 33 34 8 33 36 8 34 37 8 36 38 8 37 39 8 38 39 8 30 6 6	TRUE	0	C:\Users\qiang\Documents\Schrodinger\glide-dock_XP_346	glide-dock_XP_346_pv.maegz	1
16681750	1831	Structure2D_COMPOUND_CID_16681750.1	16681750	1	412	8	5	8	AAADceB4PAAAAAAAAAAAAAAAAAAAAAAAAAA0QAAAAAAAAAABAAAAGgAACAAADBSwmAMwCIAABgCIAiDSCAACAAAgAAAIiAEAAIgZMDaAERCiYAAloAAPiAfI6OyOAAAAAAAAAAAAAAAAAAAAAAAAAAAAAA==	5-phenyl-3-[3,4,5-trihydroxy-6-(hydroxymethyl)tetrahydropyran-2-yl]oxy-pentanoic acid	5-phenyl-3-[[3,4,5-trihydroxy-6-(hydroxymethyl)-2-oxanyl]oxy]pentanoic acid	5-phenyl-3-[3,4,5-trihydroxy-6-(hydroxymethyl)oxan-2-yl]oxypentanoic acid	5-phenyl-3-[3,4,5-trihydroxy-6-(hydroxymethyl)oxan-2-yl]oxypentanoic acid	3-[6-(hydroxymethyl)-3,4,5-tris(oxidanyl)oxan-2-yl]oxy-5-phenyl-pentanoic acid	5-phenyl-3-(3,4,5-trihydroxy-6-methylol-tetrahydropyran-2-yl)oxy-valeric acid	InChI=1S/C17H24O8/c18-9-12-14(21)15(22)16(23)17(25-12)24-11(8-13(19)20)7-6-10-4-2-1-3-5-10/h1-5,11-12,14-18,21-23H,6-9H2,(H,19,20)	HRYIDVZLDQBLFF-UHFFFAOYSA-N	-0.200	356.147	C17H24O8	356.400	C1=CC=C(C=C1)CCC(CC(=O)O)OC2C(C(C(C(O2)CO)O)O)O	C1=CC=C(C=C1)CCC(CC(=O)O)OC2C(C(C(C(O2)CO)O)O)O	137	356.147	0	25	0	6	0	0	0	1	-1	1 5 255	12 15 3 14 16 3 19 21 8 19 22 8 13 2 3 21 23 8 22 24 8 23 25 8 24 25 8 9 3 3 10 4 3 11 5 3	TRUE	0	C:\Users\qiang\Documents\Schrodinger\glide-dock_XP_346	glide-dock_XP_346_pv.maegz	1
439512	1832	PubChem_compound_text_Nigerose (Sakebiose)_records.1	439512	1	382	11	8	4	AAADceBwPAAAAAAAAAAAAAAAAAAAAAAAAAAkSAAAAAAAAAAAAAAAGgAACAAACBSwgAMACAAABgAAAAAAAAAAAAAAAAAAAAAAAAAREAIAAAAiQAAFAAAHAAHAYAwAAAAAAAAAAAAAAAAAAAAAAAAAAAAAAA==	(3R,4S,5R,6R)-6-(hydroxymethyl)-4-[(2R,3R,4S,5S,6R)-3,4,5-trihydroxy-6-(hydroxymethyl)tetrahydropyran-2-yl]oxy-tetrahydropyran-2,3,5-triol	(3R,4S,5R,6R)-6-(hydroxymethyl)-4-[[(2R,3R,4S,5S,6R)-3,4,5-trihydroxy-6-(hydroxymethyl)-2-oxanyl]oxy]oxane-2,3,5-triol	(3<I>R</I>,4<I>S</I>,5<I>R</I>,6<I>R</I>)-6-(hydroxymethyl)-4-[(2<I>R</I>,3<I>R</I>,4<I>S</I>,5<I>S</I>,6<I>R</I>)-3,4,5-trihydroxy-6-(hydroxymethyl)oxan-2-yl]oxyoxane-2,3,5-triol	(3R,4S,5R,6R)-6-(hydroxymethyl)-4-[(2R,3R,4S,5S,6R)-3,4,5-trihydroxy-6-(hydroxymethyl)oxan-2-yl]oxyoxane-2,3,5-triol	(3R,4S,5R,6R)-6-(hydroxymethyl)-4-[(2R,3R,4S,5S,6R)-6-(hydroxymethyl)-3,4,5-tris(oxidanyl)oxan-2-yl]oxy-oxane-2,3,5-triol	(3R,4S,5R,6R)-6-methylol-4-[(2R,3R,4S,5S,6R)-3,4,5-trihydroxy-6-methylol-tetrahydropyran-2-yl]oxy-tetrahydropyran-2,3,5-triol	InChI=1S/C12H22O11/c13-1-3-5(15)7(17)8(18)12(22-3)23-10-6(16)4(2-14)21-11(20)9(10)19/h3-20H,1-2H2/t3-,4-,5-,6-,7+,8-,9-,10+,11?,12-/m1/s1	QIGJYVCQYDKYDW-NSYYTRPSSA-N	-4.200	342.116	C12H22O11	342.300	C(C1C(C(C(C(O1)O)O)OC2C(C(C(C(O2)CO)O)O)O)O)O	C([C@@H]1[C@H]([C@@H]([C@H]([C@H](O1)O[C@H]2[C@@H]([C@H](OC([C@@H]2O)O)CO)O)O)O)O)O	190	342.116	0	23	9	1	0	0	0	1	1	1 5 255	12 1 6 14 1 6 19 22 6 20 23 5 21 33 3 13 4 5 15 5 6 16 6 5 17 7 5 18 8 6	TRUE	0	C:\Users\qiang\Documents\Schrodinger\glide-dock_XP_346	glide-dock_XP_346_pv.maegz	1
439512	1833	Structure2D_COMPOUND_CID_439512.1	439512	1	382	11	8	4	AAADceBwPAAAAAAAAAAAAAAAAAAAAAAAAAAkSAAAAAAAAAAAAAAAGgAACAAACBSwgAMACAAABgAAAAAAAAAAAAAAAAAAAAAAAAAREAIAAAAiQAAFAAAHAAHAYAwAAAAAAAAAAAAAAAAAAAAAAAAAAAAAAA==	(3R,4S,5R,6R)-6-(hydroxymethyl)-4-[(2R,3R,4S,5S,6R)-3,4,5-trihydroxy-6-(hydroxymethyl)tetrahydropyran-2-yl]oxy-tetrahydropyran-2,3,5-triol	(3R,4S,5R,6R)-6-(hydroxymethyl)-4-[[(2R,3R,4S,5S,6R)-3,4,5-trihydroxy-6-(hydroxymethyl)-2-oxanyl]oxy]oxane-2,3,5-triol	(3<I>R</I>,4<I>S</I>,5<I>R</I>,6<I>R</I>)-6-(hydroxymethyl)-4-[(2<I>R</I>,3<I>R</I>,4<I>S</I>,5<I>S</I>,6<I>R</I>)-3,4,5-trihydroxy-6-(hydroxymethyl)oxan-2-yl]oxyoxane-2,3,5-triol	(3R,4S,5R,6R)-6-(hydroxymethyl)-4-[(2R,3R,4S,5S,6R)-3,4,5-trihydroxy-6-(hydroxymethyl)oxan-2-yl]oxyoxane-2,3,5-triol	(3R,4S,5R,6R)-6-(hydroxymethyl)-4-[(2R,3R,4S,5S,6R)-6-(hydroxymethyl)-3,4,5-tris(oxidanyl)oxan-2-yl]oxy-oxane-2,3,5-triol	(3R,4S,5R,6R)-6-methylol-4-[(2R,3R,4S,5S,6R)-3,4,5-trihydroxy-6-methylol-tetrahydropyran-2-yl]oxy-tetrahydropyran-2,3,5-triol	InChI=1S/C12H22O11/c13-1-3-5(15)7(17)8(18)12(22-3)23-10-6(16)4(2-14)21-11(20)9(10)19/h3-20H,1-2H2/t3-,4-,5-,6-,7+,8-,9-,10+,11?,12-/m1/s1	QIGJYVCQYDKYDW-NSYYTRPSSA-N	-4.200	342.116	C12H22O11	342.300	C(C1C(C(C(C(O1)O)O)OC2C(C(C(C(O2)CO)O)O)O)O)O	C([C@@H]1[C@H]([C@@H]([C@H]([C@H](O1)O[C@H]2[C@@H]([C@H](OC([C@@H]2O)O)CO)O)O)O)O)O	190	342.116	0	23	9	1	0	0	0	1	1	1 5 255	12 1 6 14 1 6 19 22 6 20 23 5 21 33 3 13 4 5 15 5 6 16 6 5 17 7 5 18 8 6	TRUE	0	C:\Users\qiang\Documents\Schrodinger\glide-dock_XP_346	glide-dock_XP_346_pv.maegz	1
44257153	1834	Structure2D_COMPOUND_CID_44257153 (1).1	44257153	1	653	12	9	4	AAADceB4PAAAAAAAAAAAAAAAAAAAAAAAAAA0aIEAAAAAAACRQAAAGgAACAAADBSwmAMwDoAABgCAAiBCAAACCAAgIAAIiAAGiIgdNyKGMRqieCGlwBUPuAfA4PwOIAABCAAIQABAAAIQABCAAAAAAAAAAA==	(2R,3S)-2-(3,4-dihydroxyphenyl)-3-[(2S,5R)-3,4,5-trihydroxy-6-(hydroxymethyl)tetrahydropyran-2-yl]oxy-chromane-4,5,7-triol	(2R,3S)-2-(3,4-dihydroxyphenyl)-3-[[(2S,5R)-3,4,5-trihydroxy-6-(hydroxymethyl)-2-oxanyl]oxy]-3,4-dihydro-2H-1-benzopyran-4,5,7-triol	(2<I>R</I>,3<I>S</I>)-2-(3,4-dihydroxyphenyl)-3-[(2<I>S</I>,5<I>R</I>)-3,4,5-trihydroxy-6-(hydroxymethyl)oxan-2-yl]oxy-3,4-dihydro-2<I>H</I>-chromene-4,5,7-triol	(2R,3S)-2-(3,4-dihydroxyphenyl)-3-[(2S,5R)-3,4,5-trihydroxy-6-(hydroxymethyl)oxan-2-yl]oxy-3,4-dihydro-2H-chromene-4,5,7-triol	(2R,3S)-2-[3,4-bis(oxidanyl)phenyl]-3-[(2S,5R)-6-(hydroxymethyl)-3,4,5-tris(oxidanyl)oxan-2-yl]oxy-3,4-dihydro-2H-chromene-4,5,7-triol	(2R,3S)-2-(3,4-dihydroxyphenyl)-3-[(2S,5R)-3,4,5-trihydroxy-6-methylol-tetrahydropyran-2-yl]oxy-chroman-4,5,7-triol	InChI=1S/C21H24O12/c22-6-13-15(27)17(29)18(30)21(32-13)33-20-16(28)14-11(26)4-8(23)5-12(14)31-19(20)7-1-2-9(24)10(25)3-7/h1-5,13,15-30H,6H2/t13?,15-,16?,17?,18?,19+,20-,21-/m0/s1	XVCDTACMJMYHGB-XMAWOQQISA-N	-1.300	468.127	C21H24O12	468.400	C1=CC(=C(C=C1C2C(C(C3=C(C=C(C=C3O2)O)O)O)OC4C(C(C(C(O4)CO)O)O)O)O)O	C1=CC(=C(C=C1[C@@H]2[C@H](C(C3=C(C=C(C=C3O2)O)O)O)O[C@H]4C(C([C@H](C(O4)CO)O)O)O)O)O	210	468.127	0	33	4	4	0	0	0	1	-1	1 5 255	13 1 5 15 1 5 18 22 3 19 23 6 21 24 8 21 25 8 23 27 8 23 28 8 24 26 8 25 29 8 26 30 8 27 31 8 28 32 8 29 30 8 31 33 8 32 33 8 14 4 3 16 5 3 17 6 5 20 7 3	TRUE	0	C:\Users\qiang\Documents\Schrodinger\glide-dock_XP_346	glide-dock_XP_346_pv.maegz	1
44257153	1835	Structure2D_COMPOUND_CID_44257153.1	44257153	1	653	12	9	4	AAADceB4PAAAAAAAAAAAAAAAAAAAAAAAAAA0aIEAAAAAAACRQAAAGgAACAAADBSwmAMwDoAABgCAAiBCAAACCAAgIAAIiAAGiIgdNyKGMRqieCGlwBUPuAfA4PwOIAABCAAIQABAAAIQABCAAAAAAAAAAA==	(2R,3S)-2-(3,4-dihydroxyphenyl)-3-[(2S,5R)-3,4,5-trihydroxy-6-(hydroxymethyl)tetrahydropyran-2-yl]oxy-chromane-4,5,7-triol	(2R,3S)-2-(3,4-dihydroxyphenyl)-3-[[(2S,5R)-3,4,5-trihydroxy-6-(hydroxymethyl)-2-oxanyl]oxy]-3,4-dihydro-2H-1-benzopyran-4,5,7-triol	(2<I>R</I>,3<I>S</I>)-2-(3,4-dihydroxyphenyl)-3-[(2<I>S</I>,5<I>R</I>)-3,4,5-trihydroxy-6-(hydroxymethyl)oxan-2-yl]oxy-3,4-dihydro-2<I>H</I>-chromene-4,5,7-triol	(2R,3S)-2-(3,4-dihydroxyphenyl)-3-[(2S,5R)-3,4,5-trihydroxy-6-(hydroxymethyl)oxan-2-yl]oxy-3,4-dihydro-2H-chromene-4,5,7-triol	(2R,3S)-2-[3,4-bis(oxidanyl)phenyl]-3-[(2S,5R)-6-(hydroxymethyl)-3,4,5-tris(oxidanyl)oxan-2-yl]oxy-3,4-dihydro-2H-chromene-4,5,7-triol	(2R,3S)-2-(3,4-dihydroxyphenyl)-3-[(2S,5R)-3,4,5-trihydroxy-6-methylol-tetrahydropyran-2-yl]oxy-chroman-4,5,7-triol	InChI=1S/C21H24O12/c22-6-13-15(27)17(29)18(30)21(32-13)33-20-16(28)14-11(26)4-8(23)5-12(14)31-19(20)7-1-2-9(24)10(25)3-7/h1-5,13,15-30H,6H2/t13?,15-,16?,17?,18?,19+,20-,21-/m0/s1	XVCDTACMJMYHGB-XMAWOQQISA-N	-1.300	468.127	C21H24O12	468.400	C1=CC(=C(C=C1C2C(C(C3=C(C=C(C=C3O2)O)O)O)OC4C(C(C(C(O4)CO)O)O)O)O)O	C1=CC(=C(C=C1[C@@H]2[C@H](C(C3=C(C=C(C=C3O2)O)O)O)O[C@H]4C(C([C@H](C(O4)CO)O)O)O)O)O	210	468.127	0	33	4	4	0	0	0	1	-1	1 5 255	13 1 5 15 1 5 18 22 3 19 23 6 21 24 8 21 25 8 23 27 8 23 28 8 24 26 8 25 29 8 26 30 8 27 31 8 28 32 8 29 30 8 31 33 8 32 33 8 14 4 3 16 5 3 17 6 5 20 7 3	TRUE	0	C:\Users\qiang\Documents\Schrodinger\glide-dock_XP_346	glide-dock_XP_346_pv.maegz	1
50909833	1836	Structure2D_COMPOUND_CID_50909833.1	50909833	1	471	12	8	14	AAADceBzPAIAAAAAAAAAAAAAAAAAAAAAAAAAAAAAAAAAAAAAAAAAHgAQCCAACDzhgAYACALAAxAIQICQCIIAAAAAAAAAAIHIAAADEBYAgCAEQAAHMACBAAH6XAIAAAAAAAAAAAAAAAAAAAAAAAAAAAAAAA==	(2S)-2-amino-6-[[(3S,4R,5R)-3,4,5-trihydroxy-2-oxo-6-phosphonooxy-hexyl]amino]hexanoic acid	(2S)-2-amino-6-[[(3S,4R,5R)-3,4,5-trihydroxy-2-oxo-6-phosphonooxyhexyl]amino]hexanoic acid	(2<I>S</I>)-2-amino-6-[[(3<I>S</I>,4<I>R</I>,5<I>R</I>)-3,4,5-trihydroxy-2-oxo-6-phosphonooxyhexyl]amino]hexanoic acid	(2S)-2-amino-6-[[(3S,4R,5R)-3,4,5-trihydroxy-2-oxo-6-phosphonooxyhexyl]amino]hexanoic acid	(2S)-2-azanyl-6-[[(3S,4R,5R)-3,4,5-tris(oxidanyl)-2-oxidanylidene-6-phosphonooxy-hexyl]amino]hexanoic acid	(2S)-2-amino-6-[[(3S,4R,5R)-3,4,5-trihydroxy-2-keto-6-phosphonooxy-hexyl]amino]hexanoic acid	InChI=1S/C12H25N2O10P/c13-7(12(19)20)3-1-2-4-14-5-8(15)10(17)11(18)9(16)6-24-25(21,22)23/h7,9-11,14,16-18H,1-6,13H2,(H,19,20)(H2,21,22,23)/t7-,9+,10+,11+/m0/s1	ZICZRZZPXBCXCE-AYHFEMFVSA-N	-8.900	388.125	C12H25N2O10P	388.310	C(CCNCC(=O)C(C(C(COP(=O)(O)O)O)O)O)CC(C(=O)O)N	C(CCNCC(=O)[C@H]([C@@H]([C@@H](COP(=O)(O)O)O)O)O)C[C@@H](C(=O)O)N	220	388.125	0	25	4	0	0	0	0	1	-1	1 5 255	24 13 6 14 2 6 15 3 6 16 4 5	TRUE	0	C:\Users\qiang\Documents\Schrodinger\glide-dock_XP_346	glide-dock_XP_346_pv.maegz	1
101635263	1837	Structure2D_COMPOUND_CID_101635263.1	101635263	1	846	14	8	25	AAADcfB8PAAAAAAAAAAAAAAAAAAAAAAAAAAkSAAAAAAAAAAAAAAAGgAACAAACBSwgAMCCAAABgCIACDSCAAAAAAgAAAICAEAAAgREBIAAQAiQAAFgAAPAAPI6KyAAAAAAAAAAAAAAAAAAAAAAAAAAAAAAA==	[(2S)-2-hydroxy-3-[(2R,3R,4S,5R,6R)-3,4,5-trihydroxy-6-[[(2S,3R,4S,5R,6R)-3,4,5-trihydroxy-6-(hydroxymethyl)tetrahydropyran-2-yl]oxymethyl]tetrahydropyran-2-yl]oxy-propyl] (E)-octadec-9-enoate	(E)-9-octadecenoic acid [(2S)-2-hydroxy-3-[[(2R,3R,4S,5R,6R)-3,4,5-trihydroxy-6-[[(2S,3R,4S,5R,6R)-3,4,5-trihydroxy-6-(hydroxymethyl)-2-oxanyl]oxymethyl]-2-oxanyl]oxy]propyl] ester	[(2<I>S</I>)-2-hydroxy-3-[(2<I>R</I>,3<I>R</I>,4<I>S</I>,5<I>R</I>,6<I>R</I>)-3,4,5-trihydroxy-6-[[(2<I>S</I>,3<I>R</I>,4<I>S</I>,5<I>R</I>,6<I>R</I>)-3,4,5-trihydroxy-6-(hydroxymethyl)oxan-2-yl]oxymethyl]oxan-2-yl]oxypropyl] (<I>E</I>)-octadec-9-enoate	[(2S)-2-hydroxy-3-[(2R,3R,4S,5R,6R)-3,4,5-trihydroxy-6-[[(2S,3R,4S,5R,6R)-3,4,5-trihydroxy-6-(hydroxymethyl)oxan-2-yl]oxymethyl]oxan-2-yl]oxypropyl] (E)-octadec-9-enoate	[(2S)-3-[(2R,3R,4S,5R,6R)-6-[[(2S,3R,4S,5R,6R)-6-(hydroxymethyl)-3,4,5-tris(oxidanyl)oxan-2-yl]oxymethyl]-3,4,5-tris(oxidanyl)oxan-2-yl]oxy-2-oxidanyl-propyl] (E)-octadec-9-enoate	(E)-octadec-9-enoic acid [(2S)-2-hydroxy-3-[(2R,3R,4S,5R,6R)-3,4,5-trihydroxy-6-[[(2S,3R,4S,5R,6R)-3,4,5-trihydroxy-6-methylol-tetrahydropyran-2-yl]oxymethyl]tetrahydropyran-2-yl]oxy-propyl] ester	InChI=1S/C33H60O14/c1-2-3-4-5-6-7-8-9-10-11-12-13-14-15-16-17-25(36)43-19-22(35)20-44-32-31(42)29(40)27(38)24(47-32)21-45-33-30(41)28(39)26(37)23(18-34)46-33/h9-10,22-24,26-35,37-42H,2-8,11-21H2,1H3/b10-9+/t22-,23-,24-,26+,27+,28+,29+,30-,31-,32-,33+/m1/s1	VROZOADUAPWACT-SEALLASQSA-N	2.600	680.398	C33H60O14	680.800	CCCCCCCCC=CCCCCCCCC(=O)OCC(COC1C(C(C(C(O1)COC2C(C(C(C(O2)CO)O)O)O)O)O)O)O	CCCCCCCC/C=C/CCCCCCCC(=O)OC[C@H](CO[C@H]1[C@@H]([C@H]([C@H]([C@H](O1)CO[C@@H]2[C@@H]([C@H]([C@H]([C@H](O2)CO)O)O)O)O)O)O)O	225	680.398	0	47	11	0	1	0	0	1	-1	1 5 255	22 10 5 28 12 5 15 25 5 24 26 5 20 3 6 23 4 5 16 5 5 17 6 5 18 7 6 19 8 6 21 9 5	TRUE	0	C:\Users\qiang\Documents\Schrodinger\glide-dock_XP_346	glide-dock_XP_346_pv.maegz	1
85183002	1838	Structure2D_COMPOUND_CID_85183002.1	85183002	1	786	11	6	8	AAADcfB4PAAAAAAAAAAAAAAAAAAAAAAAAAAkSIAAAAAAAAAAAAAAGgAACAAADxSwgAMCCAAABgCIAqBSAAAAAAAgAAAACAEAAEgREBIAAQAiQAAFgAAPAQPI6PyPgAAAAAAAAAAAAAAAAAAAAAAAAAAAAA==	3,5,5-trimethyl-4-[3-[3,4,5-trihydroxy-6-[(3,4,5-trihydroxy-6-methyl-tetrahydropyran-2-yl)oxymethyl]tetrahydropyran-2-yl]oxybutyl]cyclohex-2-en-1-one	3,5,5-trimethyl-4-[3-[[3,4,5-trihydroxy-6-[(3,4,5-trihydroxy-6-methyl-2-oxanyl)oxymethyl]-2-oxanyl]oxy]butyl]-1-cyclohex-2-enone	3,5,5-trimethyl-4-[3-[3,4,5-trihydroxy-6-[(3,4,5-trihydroxy-6-methyloxan-2-yl)oxymethyl]oxan-2-yl]oxybutyl]cyclohex-2-en-1-one	3,5,5-trimethyl-4-[3-[3,4,5-trihydroxy-6-[(3,4,5-trihydroxy-6-methyloxan-2-yl)oxymethyl]oxan-2-yl]oxybutyl]cyclohex-2-en-1-one	3,5,5-trimethyl-4-[3-[6-[[6-methyl-3,4,5-tris(oxidanyl)oxan-2-yl]oxymethyl]-3,4,5-tris(oxidanyl)oxan-2-yl]oxybutyl]cyclohex-2-en-1-one	3,5,5-trimethyl-4-[3-[3,4,5-trihydroxy-6-[(3,4,5-trihydroxy-6-methyl-tetrahydropyran-2-yl)oxymethyl]tetrahydropyran-2-yl]oxybutyl]cyclohex-2-en-1-one	InChI=1S/C25H42O11/c1-11-8-14(26)9-25(4,5)15(11)7-6-12(2)34-24-22(32)20(30)18(28)16(36-24)10-33-23-21(31)19(29)17(27)13(3)35-23/h8,12-13,15-24,27-32H,6-7,9-10H2,1-5H3	XTPQCRPHXZBRMP-UHFFFAOYSA-N	-1.300	518.273	C25H42O11	518.600	CC1C(C(C(C(O1)OCC2C(C(C(C(O2)OC(C)CCC3C(=CC(=O)CC3(C)C)C)O)O)O)O)O)O	CC1C(C(C(C(O1)OCC2C(C(C(C(O2)OC(C)CCC3C(=CC(=O)CC3(C)C)C)O)O)O)O)O)O	175	518.273	0	36	0	12	0	0	0	1	-1	1 5 255	32 10 3 33 11 3 13 14 3 22 2 3 20 28 3 21 35 3 29 3 3 34 36 3 23 5 3 25 6 3 24 7 3 30 9 3	TRUE	0	C:\Users\qiang\Documents\Schrodinger\glide-dock_XP_346	glide-dock_XP_346_pv.maegz	1
441472	1839	Structure2D_COMPOUND_CID_441472.1	441472	1	397	9	5	5	AAADceByPAAAAAAAAAAAAAAAEgAAAAAAAAAkAAAAAAAAAAAAAAAAHgAACAAADFSxgAMACAAABgAQBAAAAAAAAAAAAAAAAAAAAAARkAIAAAAiQAAFAAAHAAnAYAwIAAAAAAAAAAAAAAAAAAAAAAAAAAAAAA==	2-(hydroxymethyl)-3-[[(2R,3R,4S,5S,6R)-3,4,5-trihydroxy-6-(hydroxymethyl)tetrahydropyran-2-yl]oxymethyl]oxirane-2-carbonitrile	2-(hydroxymethyl)-3-[[(2R,3R,4S,5S,6R)-3,4,5-trihydroxy-6-(hydroxymethyl)-2-oxanyl]oxymethyl]-2-oxiranecarbonitrile	2-(hydroxymethyl)-3-[[(2<I>R</I>,3<I>R</I>,4<I>S</I>,5<I>S</I>,6<I>R</I>)-3,4,5-trihydroxy-6-(hydroxymethyl)oxan-2-yl]oxymethyl]oxirane-2-carbonitrile	2-(hydroxymethyl)-3-[[(2R,3R,4S,5S,6R)-3,4,5-trihydroxy-6-(hydroxymethyl)oxan-2-yl]oxymethyl]oxirane-2-carbonitrile	2-(hydroxymethyl)-3-[[(2R,3R,4S,5S,6R)-6-(hydroxymethyl)-3,4,5-tris(oxidanyl)oxan-2-yl]oxymethyl]oxirane-2-carbonitrile	2-methylol-3-[[(2R,3R,4S,5S,6R)-3,4,5-trihydroxy-6-methylol-tetrahydropyran-2-yl]oxymethyl]oxirane-2-carbonitrile	InChI=1S/C11H17NO8/c12-3-11(4-14)6(20-11)2-18-10-9(17)8(16)7(15)5(1-13)19-10/h5-10,13-17H,1-2,4H2/t5-,6?,7-,8+,9-,10-,11?/m1/s1	MGWCXJDKHMCXRL-YMGPVYFXSA-N	-3.400	291.095	C11H17NO8	291.250	C(C1C(C(C(C(O1)OCC2C(O2)(CO)C#N)O)O)O)O	C([C@@H]1[C@H]([C@@H]([C@H]([C@@H](O1)OCC2C(O2)(CO)C#N)O)O)O)O	156	291.095	0	20	5	2	0	0	0	1	1	1 5 255	10 21 3 11 18 3 17 19 5 13 3 5 12 4 6 14 5 5 15 6 6	TRUE	0	C:\Users\qiang\Documents\Schrodinger\glide-dock_XP_346	glide-dock_XP_346_pv.maegz	1
5281793	1840	Structure2D_COMPOUND_CID_5281793 (1).1	5281793	1	798	10	7	9	AAADceB4PAAAAAAAAAAAAAAAAAAAAAAAAAAwYMAAAAAAAAABUAAAGgAACAAADBSgmAIwDoAABgCIAiDSCAICAAAgIAAIiAFGiMgJJjKCMRaCcAEkwBELuYeI6LyOoAABAAAYQABAAAIAADCAAAAAAAAAAA==	(2R)-3-(3,4-dihydroxyphenyl)-2-[(E)-3-[2-[(E)-2-(3,4-dihydroxyphenyl)vinyl]-3,4-dihydroxy-phenyl]prop-2-enoyl]oxy-propanoic acid	(2R)-3-(3,4-dihydroxyphenyl)-2-[(E)-3-[2-[(E)-2-(3,4-dihydroxyphenyl)ethenyl]-3,4-dihydroxyphenyl]-1-oxoprop-2-enoxy]propanoic acid	(2<I>R</I>)-3-(3,4-dihydroxyphenyl)-2-[(<I>E</I>)-3-[2-[(<I>E</I>)-2-(3,4-dihydroxyphenyl)ethenyl]-3,4-dihydroxyphenyl]prop-2-enoyl]oxypropanoic acid	(2R)-3-(3,4-dihydroxyphenyl)-2-[(E)-3-[2-[(E)-2-(3,4-dihydroxyphenyl)ethenyl]-3,4-dihydroxyphenyl]prop-2-enoyl]oxypropanoic acid	(2R)-3-[3,4-bis(oxidanyl)phenyl]-2-[(E)-3-[2-[(E)-2-[3,4-bis(oxidanyl)phenyl]ethenyl]-3,4-bis(oxidanyl)phenyl]prop-2-enoyl]oxy-propanoic acid	(2R)-3-(3,4-dihydroxyphenyl)-2-[(E)-3-[2-[(E)-2-(3,4-dihydroxyphenyl)vinyl]-3,4-dihydroxy-phenyl]acryloyl]oxy-propionic acid	InChI=1S/C26H22O10/c27-18-7-2-14(11-21(18)30)1-6-17-16(4-9-20(29)25(17)33)5-10-24(32)36-23(26(34)35)13-15-3-8-19(28)22(31)12-15/h1-12,23,27-31,33H,13H2,(H,34,35)/b6-1+,10-5+/t23-/m1/s1	YMGFTDKNIWPMGF-UCPJVGPRSA-N	3.900	494.121	C26H22O10	494.400	C1=CC(=C(C=C1CC(C(=O)O)OC(=O)C=CC2=C(C(=C(C=C2)O)O)C=CC3=CC(=C(C=C3)O)O)O)O	C1=CC(=C(C=C1C[C@H](C(=O)O)OC(=O)/C=C/C2=C(C(=C(C=C2)O)O)/C=C/C3=CC(=C(C=C3)O)O)O)O	185	494.121	0	36	1	0	2	0	0	1	994	1 5 255	12 1 6 13 14 8 13 15 8 14 19 8 15 20 8 16 17 8 16 22 8 17 24 8 19 21 8 20 21 8 22 27 8 24 29 8 27 29 8 31 32 8 31 33 8 32 34 8 33 35 8 34 36 8 35 36 8	TRUE	0	C:\Users\qiang\Documents\Schrodinger\glide-dock_XP_346	glide-dock_XP_346_pv.maegz	1
5281793	1841	Structure2D_COMPOUND_CID_5281793.1	5281793	1	798	10	7	9	AAADceB4PAAAAAAAAAAAAAAAAAAAAAAAAAAwYMAAAAAAAAABUAAAGgAACAAADBSgmAIwDoAABgCIAiDSCAICAAAgIAAIiAFGiMgJJjKCMRaCcAEkwBELuYeI6LyOoAABAAAYQABAAAIAADCAAAAAAAAAAA==	(2R)-3-(3,4-dihydroxyphenyl)-2-[(E)-3-[2-[(E)-2-(3,4-dihydroxyphenyl)vinyl]-3,4-dihydroxy-phenyl]prop-2-enoyl]oxy-propanoic acid	(2R)-3-(3,4-dihydroxyphenyl)-2-[(E)-3-[2-[(E)-2-(3,4-dihydroxyphenyl)ethenyl]-3,4-dihydroxyphenyl]-1-oxoprop-2-enoxy]propanoic acid	(2<I>R</I>)-3-(3,4-dihydroxyphenyl)-2-[(<I>E</I>)-3-[2-[(<I>E</I>)-2-(3,4-dihydroxyphenyl)ethenyl]-3,4-dihydroxyphenyl]prop-2-enoyl]oxypropanoic acid	(2R)-3-(3,4-dihydroxyphenyl)-2-[(E)-3-[2-[(E)-2-(3,4-dihydroxyphenyl)ethenyl]-3,4-dihydroxyphenyl]prop-2-enoyl]oxypropanoic acid	(2R)-3-[3,4-bis(oxidanyl)phenyl]-2-[(E)-3-[2-[(E)-2-[3,4-bis(oxidanyl)phenyl]ethenyl]-3,4-bis(oxidanyl)phenyl]prop-2-enoyl]oxy-propanoic acid	(2R)-3-(3,4-dihydroxyphenyl)-2-[(E)-3-[2-[(E)-2-(3,4-dihydroxyphenyl)vinyl]-3,4-dihydroxy-phenyl]acryloyl]oxy-propionic acid	InChI=1S/C26H22O10/c27-18-7-2-14(11-21(18)30)1-6-17-16(4-9-20(29)25(17)33)5-10-24(32)36-23(26(34)35)13-15-3-8-19(28)22(31)12-15/h1-12,23,27-31,33H,13H2,(H,34,35)/b6-1+,10-5+/t23-/m1/s1	YMGFTDKNIWPMGF-UCPJVGPRSA-N	3.900	494.121	C26H22O10	494.400	C1=CC(=C(C=C1CC(C(=O)O)OC(=O)C=CC2=C(C(=C(C=C2)O)O)C=CC3=CC(=C(C=C3)O)O)O)O	C1=CC(=C(C=C1C[C@H](C(=O)O)OC(=O)/C=C/C2=C(C(=C(C=C2)O)O)/C=C/C3=CC(=C(C=C3)O)O)O)O	185	494.121	0	36	1	0	2	0	0	1	994	1 5 255	12 1 6 13 14 8 13 15 8 14 19 8 15 20 8 16 17 8 16 22 8 17 24 8 19 21 8 20 21 8 22 27 8 24 29 8 27 29 8 31 32 8 31 33 8 32 34 8 33 35 8 34 36 8 35 36 8	TRUE	0	C:\Users\qiang\Documents\Schrodinger\glide-dock_XP_346	glide-dock_XP_346_pv.maegz	1
5281266	1842	Structure2D_COMPOUND_CID_5281266.1	5281266	1	643	5	2	5	AAADcfB6OAAAAAAAAAAAAAAAAAAAAAAAAAAwYMAAAAAAAADAAAAAHgAACAAADxThgAYCCAMABgCIAiDSCAAAAAAgAAAACAAIAEgCFAIAIQADUAAEgAAYIQOA4PQPgAAAAAAAAADAAAYAADAAAAAAAAAAAA==	2-(dimethylamino)ethyl (2E)-2-[(1R,4aS,4bR,7S,8aR,10S,10aS)-7,10-dihydroxy-1,4b,8,8-tetramethyl-3,4,4a,5,6,7,8a,9,10,10a-decahydro-1H-phenanthren-2-ylidene]acetate	(2E)-2-[(1R,4aS,4bR,7S,8aR,10S,10aS)-7,10-dihydroxy-1,4b,8,8-tetramethyl-3,4,4a,5,6,7,8a,9,10,10a-decahydro-1H-phenanthren-2-ylidene]acetic acid 2-(dimethylamino)ethyl ester	2-(dimethylamino)ethyl (2<I>E</I>)-2-[(1<I>R</I>,4<I>a</I><I>S</I>,4<I>b</I><I>R</I>,7<I>S</I>,8<I>a</I><I>R</I>,10<I>S</I>,10<I>a</I><I>S</I>)-7,10-dihydroxy-1,4<I>b</I>,8,8-tetramethyl-3,4,4<I>a</I>,5,6,7,8<I>a</I>,9,10,10<I>a</I>-decahydro-1<I>H</I>-phenanthren-2-ylidene]acetate	2-(dimethylamino)ethyl (2E)-2-[(1R,4aS,4bR,7S,8aR,10S,10aS)-7,10-dihydroxy-1,4b,8,8-tetramethyl-3,4,4a,5,6,7,8a,9,10,10a-decahydro-1H-phenanthren-2-ylidene]acetate	2-(dimethylamino)ethyl (2E)-2-[(1R,4aS,4bR,7S,8aR,10S,10aS)-1,4b,8,8-tetramethyl-7,10-bis(oxidanyl)-3,4,4a,5,6,7,8a,9,10,10a-decahydro-1H-phenanthren-2-ylidene]ethanoate	(2E)-2-[(1R,4aS,4bR,7S,8aR,10S,10aS)-7,10-dihydroxy-1,4b,8,8-tetramethyl-3,4,4a,5,6,7,8a,9,10,10a-decahydro-1H-phenanthren-2-ylidene]acetic acid 2-(dimethylamino)ethyl ester	InChI=1S/C24H41NO4/c1-15-16(13-21(28)29-12-11-25(5)6)7-8-17-22(15)18(26)14-19-23(2,3)20(27)9-10-24(17,19)4/h13,15,17-20,22,26-27H,7-12,14H2,1-6H3/b16-13+/t15-,17-,18-,19-,20-,22-,24+/m0/s1	JKPVSFQJGXEMSU-CHEGSHICSA-N	3.400	407.304	C24H41NO4	407.600	CC1C2C(CCC1=CC(=O)OCCN(C)C)C3(CCC(C(C3CC2O)(C)C)O)C	C[C@@H]\1[C@H]2[C@H](CC/C1=C\C(=O)OCCN(C)C)[C@]3(CC[C@@H](C([C@@H]3C[C@@H]2O)(C)C)O)C	70	407.304	0	29	7	0	1	0	0	1	1	1 5 255	13 1 5 16 23 6 14 2 5 6 18 5 7 30 6 8 31 6 9 32 5	TRUE	0	C:\Users\qiang\Documents\Schrodinger\glide-dock_XP_346	glide-dock_XP_346_pv.maegz	1
44347795	1843	Structure2D_COMPOUND_CID_44347795.1	44347795	1	656	6	6	10	AAADceB7uAAAAAAAAAAAAAAAAAAAAWAAAAAwAAAAAAAAAFgB8AAAHgAQCAAADSjBngQ+yPLJkgCoAzX3XACCgCAxAiAI2aG4ZJgKYPrA0bGUYAhklgDYyAc/icCOgAAAAAACAAAAAAAAAAQAAAAAAAAAAA==	(2S)-4-amino-2-[[(2S)-2-[[(2S)-2-amino-3-(1H-indol-3-yl)propanoyl]amino]-3-methyl-butanoyl]amino]-4-oxo-butanoic acid	(2S)-4-amino-2-[[(2S)-2-[[(2S)-2-amino-3-(1H-indol-3-yl)-1-oxopropyl]amino]-3-methyl-1-oxobutyl]amino]-4-oxobutanoic acid	(2<I>S</I>)-4-amino-2-[[(2<I>S</I>)-2-[[(2<I>S</I>)-2-amino-3-(1<I>H</I>-indol-3-yl)propanoyl]amino]-3-methylbutanoyl]amino]-4-oxobutanoic acid	(2S)-4-amino-2-[[(2S)-2-[[(2S)-2-amino-3-(1H-indol-3-yl)propanoyl]amino]-3-methylbutanoyl]amino]-4-oxobutanoic acid	(2S)-4-azanyl-2-[[(2S)-2-[[(2S)-2-azanyl-3-(1H-indol-3-yl)propanoyl]amino]-3-methyl-butanoyl]amino]-4-oxidanylidene-butanoic acid	(2S)-4-amino-2-[[(2S)-2-[[(2S)-2-amino-3-(1H-indol-3-yl)propanoyl]amino]-3-methyl-butanoyl]amino]-4-keto-butyric acid	InChI=1S/C20H27N5O5/c1-10(2)17(19(28)24-15(20(29)30)8-16(22)26)25-18(27)13(21)7-11-9-23-14-6-4-3-5-12(11)14/h3-6,9-10,13,15,17,23H,7-8,21H2,1-2H3,(H2,22,26)(H,24,28)(H,25,27)(H,29,30)/t13-,15-,17-/m0/s1	XKTWZYNTLXITCY-QRTARXTBSA-N		417.201	C20H27N5O5	417.500	CC(C)C(C(=O)NC(CC(=O)N)C(=O)O)NC(=O)C(CC1=CNC2=CC=CC=C21)N	CC(C)[C@@H](C(=O)N[C@@H](CC(=O)N)C(=O)O)NC(=O)[C@H](CC1=CNC2=CC=CC=C21)N	180	417.201	0	30	3	0	0	0	0	1	-1	1 5 255	17 20 8 17 23 8 20 22 8 20 25 8 22 26 8 25 28 8 26 29 8 28 29 8 11 6 5 21 7 6 8 22 8 8 23 8 13 9 5	TRUE	0	C:\Users\qiang\Documents\Schrodinger\glide-dock_XP_346	glide-dock_XP_346_pv.maegz	1
131752247	1844	Structure2D_COMPOUND_CID_131752247.1	131752247	1	324	8	6	6	AAADceByOAAAAAAAAAAAAAAAAAAAASAAAAAAAAAAAAAAAAAAAAAAHgAQCAAADTzhgAYCCALABgAIAACQCAAAAAAAAAAAAIGIAAATEBIAgCAHQAAHEACXAAHwcAYIAAAAAAAAAAAAAAAAAAAAAAAAAAAAAA==	(2S)-3-methyl-2-[[(3S,4S,5R)-2,3,4-trihydroxy-5-(hydroxymethyl)tetrahydrofuran-2-yl]methylamino]butanoic acid	(2S)-3-methyl-2-[[(3S,4S,5R)-2,3,4-trihydroxy-5-(hydroxymethyl)-2-oxolanyl]methylamino]butanoic acid	(2<I>S</I>)-3-methyl-2-[[(3<I>S</I>,4<I>S</I>,5<I>R</I>)-2,3,4-trihydroxy-5-(hydroxymethyl)oxolan-2-yl]methylamino]butanoic acid	(2S)-3-methyl-2-[[(3S,4S,5R)-2,3,4-trihydroxy-5-(hydroxymethyl)oxolan-2-yl]methylamino]butanoic acid	(2S)-2-[[(3S,4S,5R)-5-(hydroxymethyl)-2,3,4-tris(oxidanyl)oxolan-2-yl]methylamino]-3-methyl-butanoic acid	(2S)-3-methyl-2-[[(3S,4S,5R)-2,3,4-trihydroxy-5-methylol-tetrahydrofuran-2-yl]methylamino]butyric acid	InChI=1S/C11H21NO7/c1-5(2)7(10(16)17)12-4-11(18)9(15)8(14)6(3-13)19-11/h5-9,12-15,18H,3-4H2,1-2H3,(H,16,17)/t6-,7+,8-,9+,11?/m1/s1	OANCGDPJMNPBDV-BUFOXMIFSA-N	-3.400	279.132	C11H21NO7	279.290	CC(C)C(C(=O)O)NCC1(C(C(C(O1)CO)O)O)O	CC(C)[C@@H](C(=O)O)NCC1([C@H]([C@@H]([C@H](O1)CO)O)O)O	140	279.132	0	19	4	1	0	0	0	1	-1	1 5 255	12 14 6 10 3 6 11 4 5 15 8 5 9 13 3	TRUE	0	C:\Users\qiang\Documents\Schrodinger\glide-dock_XP_346	glide-dock_XP_346_pv.maegz	1
45139032	1845	Structure2D_COMPOUND_CID_45139032.1	45139032	1	639	6	5	14	AAADcfB6OAAAAAAAAAAAAAAAAAAAAYAAAAAwAAAAAAAAAAABAAAAHgAQCAAADTzhmAYwAILAAgCIAqFSEAACAAAgAAAIiIEIAIgKNDaAkRCEcAAl9gCYmAeayKCOgAAAAAAAAAAAAAAAAAAAAIAADAAAAA==	(Z)-N-[2-hydroxy-1-(hydroxymethyl)ethyl]-7-[(1R,3R)-3-hydroxy-2-[(E,3S)-3-hydroxy-5-phenyl-pent-1-enyl]-5-oxo-cyclopentyl]hept-5-enamide	(Z)-N-(1,3-dihydroxypropan-2-yl)-7-[(1R,3R)-3-hydroxy-2-[(E,3S)-3-hydroxy-5-phenylpent-1-enyl]-5-oxocyclopentyl]-5-heptenamide	(<I>Z</I>)-<I>N</I>-(1,3-dihydroxypropan-2-yl)-7-[(1<I>R</I>,3<I>R</I>)-3-hydroxy-2-[(<I>E</I>,3<I>S</I>)-3-hydroxy-5-phenylpent-1-enyl]-5-oxocyclopentyl]hept-5-enamide	(Z)-N-(1,3-dihydroxypropan-2-yl)-7-[(1R,3R)-3-hydroxy-2-[(E,3S)-3-hydroxy-5-phenylpent-1-enyl]-5-oxocyclopentyl]hept-5-enamide	(Z)-N-[1,3-bis(oxidanyl)propan-2-yl]-7-[(1R,3R)-3-oxidanyl-5-oxidanylidene-2-[(E,3S)-3-oxidanyl-5-phenyl-pent-1-enyl]cyclopentyl]hept-5-enamide	(Z)-7-[(1R,3R)-3-hydroxy-2-[(E,3S)-3-hydroxy-5-phenyl-pent-1-enyl]-5-keto-cyclopentyl]-N-(2-hydroxy-1-methylol-ethyl)hept-5-enamide	InChI=1S/C26H37NO6/c28-17-20(18-29)27-26(33)11-7-2-1-6-10-22-23(25(32)16-24(22)31)15-14-21(30)13-12-19-8-4-3-5-9-19/h1,3-6,8-9,14-15,20-23,25,28-30,32H,2,7,10-13,16-18H2,(H,27,33)/b6-1-,15-14+/t21-,22+,23?,25+/m0/s1	NYRITJWASKBGOC-YNIOAQSFSA-N		459.262	C26H37NO6	459.600	C1C(C(C(C1=O)CC=CCCCC(=O)NC(CO)CO)C=CC(CCC2=CC=CC=C2)O)O	C1[C@H](C([C@H](C1=O)C/C=C\CCCC(=O)NC(CO)CO)/C=C/[C@H](CCC2=CC=CC=C2)O)O	127	459.262	0	33	3	1	2	0	0	1	6	1 5 255	10 1 6 24 26 8 24 27 8 26 31 8 27 32 8 17 3 6 31 33 8 32 33 8 8 14 3 9 13 6	TRUE	0	C:\Users\qiang\Documents\Schrodinger\glide-dock_XP_346	glide-dock_XP_346_pv.maegz	1
145458479	1846	Structure2D_COMPOUND_CID_145458479.1	145458479	1	626	5	4	7	AAADceB7uAAAAAAAAAAAAAAAAAAAAWLAAAAwAAAAAAAAAFgB8AAAHgAQCAAADSjBngQ+yPPJkgCoAzX3XACCgCAxAiAI2aG4ZJgKYPLAkbGUYAhklgDYyAcYicCOgAAAAAACAAAAAAAAAAQAAAAAAAAAAA==	(2S)-2-[[(2S)-1-[(2S)-2-amino-3-(1H-indol-3-yl)propanoyl]pyrrolidine-2-carbonyl]amino]-3-methyl-butanoic acid	(2S)-2-[[[(2S)-1-[(2S)-2-amino-3-(1H-indol-3-yl)-1-oxopropyl]-2-pyrrolidinyl]-oxomethyl]amino]-3-methylbutanoic acid	(2<I>S</I>)-2-[[(2<I>S</I>)-1-[(2<I>S</I>)-2-amino-3-(1<I>H</I>-indol-3-yl)propanoyl]pyrrolidine-2-carbonyl]amino]-3-methylbutanoic acid	(2S)-2-[[(2S)-1-[(2S)-2-amino-3-(1H-indol-3-yl)propanoyl]pyrrolidine-2-carbonyl]amino]-3-methylbutanoic acid	(2S)-2-[[(2S)-1-[(2S)-2-azanyl-3-(1H-indol-3-yl)propanoyl]pyrrolidin-2-yl]carbonylamino]-3-methyl-butanoic acid	(2S)-2-[[(2S)-1-[(2S)-2-amino-3-(1H-indol-3-yl)propanoyl]prolyl]amino]-3-methyl-butyric acid	InChI=1S/C21H28N4O4/c1-12(2)18(21(28)29)24-19(26)17-8-5-9-25(17)20(27)15(22)10-13-11-23-16-7-4-3-6-14(13)16/h3-4,6-7,11-12,15,17-18,23H,5,8-10,22H2,1-2H3,(H,24,26)(H,28,29)/t15-,17-,18-/m0/s1	JEYRCNVVYHTZMY-SZMVWBNQSA-N		400.211	C21H28N4O4	400.500	CC(C)C(C(=O)O)NC(=O)C1CCCN1C(=O)C(CC2=CNC3=CC=CC=C32)N	CC(C)[C@@H](C(=O)O)NC(=O)[C@@H]1CCCN1C(=O)[C@H](CC2=CNC3=CC=CC=C32)N	129	400.211	0	29	3	0	0	0	0	1	-1	1 5 255	19 20 8 19 24 8 20 25 8 20 26 8 25 27 8 26 28 8 27 29 8 28 29 8 16 6 5 15 7 5 8 24 8 8 25 8 9 13 6	TRUE	0	C:\Users\qiang\Documents\Schrodinger\glide-dock_XP_346	glide-dock_XP_346_pv.maegz	1
9548805	1847	Structure2D_COMPOUND_CID_9548805.1	9548805	1	1020	12	8	25	AAADcfB7PABAAAAAAAAAAAAAAAAAAAAAAAAAAAAAAAAAAAAAAAAAHgQQCAAACDzlwAaCCALAAgiIACHSGAAAAAAgABAICIGIAAgKVBIggSAUUAAE1gC4kAOc/ybAAAAAAAAAAAAAAAAAAAAAAAAAAAAAAA==	(5S,6R,7E,9E,11Z,13E,15S)-6-[(2R)-2-[[(4S)-4-amino-4-carboxy-butanoyl]amino]-3-(carboxymethylamino)-3-oxo-propyl]sulfanyl-5,15-dihydroxy-icosa-7,9,11,13-tetraenoic acid	(5S,6R,7E,9E,11Z,13E,15S)-6-[[(2R)-2-[[(4S)-4-amino-4-carboxy-1-oxobutyl]amino]-3-(carboxymethylamino)-3-oxopropyl]thio]-5,15-dihydroxyeicosa-7,9,11,13-tetraenoic acid	(5<I>S</I>,6<I>R</I>,7<I>E</I>,9<I>E</I>,11<I>Z</I>,13<I>E</I>,15<I>S</I>)-6-[(2<I>R</I>)-2-[[(4<I>S</I>)-4-amino-4-carboxybutanoyl]amino]-3-(carboxymethylamino)-3-oxopropyl]sulfanyl-5,15-dihydroxyicosa-7,9,11,13-tetraenoic acid	(5S,6R,7E,9E,11Z,13E,15S)-6-[(2R)-2-[[(4S)-4-amino-4-carboxybutanoyl]amino]-3-(carboxymethylamino)-3-oxopropyl]sulfanyl-5,15-dihydroxyicosa-7,9,11,13-tetraenoic acid	(5S,6R,7E,9E,11Z,13E,15S)-6-[(2R)-2-[[(4S)-4-azanyl-5-oxidanyl-5-oxidanylidene-pentanoyl]amino]-3-(2-hydroxy-2-oxoethylamino)-3-oxidanylidene-propyl]sulfanyl-5,15-bis(oxidanyl)icosa-7,9,11,13-tetraenoic acid	(5S,6R,7E,9E,11Z,13E,15S)-6-[[(2R)-2-[[(4S)-4-amino-4-carboxy-butanoyl]amino]-3-(carboxymethylamino)-3-keto-propyl]thio]-5,15-dihydroxy-eicosa-7,9,11,13-tetraenoic acid	InChI=1S/C30H47N3O10S/c1-2-3-8-12-21(34)13-9-6-4-5-7-10-15-25(24(35)14-11-16-27(37)38)44-20-23(29(41)32-19-28(39)40)33-26(36)18-17-22(31)30(42)43/h4-7,9-10,13,15,21-25,34-35H,2-3,8,11-12,14,16-20,31H2,1H3,(H,32,41)(H,33,36)(H,37,38)(H,39,40)(H,42,43)/b6-4-,7-5+,13-9+,15-10+/t21-,22-,23-,24-,25+/m0/s1	CYCIJLWHNZKKBC-MTFYIJSJSA-N	-0.600	641.298	C30H47N3O10S	641.800	CCCCCC(C=CC=CC=CC=CC(C(CCCC(=O)O)O)SCC(C(=O)NCC(=O)O)NC(=O)CCC(C(=O)O)N)O	CCCCC[C@@H](/C=C/C=C\C=C\C=C\[C@H]([C@H](CCCC(=O)O)O)SC[C@@H](C(=O)NCC(=O)O)NC(=O)CC[C@@H](C(=O)O)N)O	262	641.298	0	44	5	0	4	0	0	1	4	1 5 255	19 12 6 33 14 5 16 22 5 15 2 5 31 4 5	TRUE	0	C:\Users\qiang\Documents\Schrodinger\glide-dock_XP_346	glide-dock_XP_346_pv.maegz	1
53491908	1848	Structure2D_COMPOUND_CID_53491908.1	53491908	1	472	6	4	10	AAADcfB7uAAAAAAAAAAAAAAAAAAAAWAAAAAAAAAAAAAAAAAAAAAAHgAQCAAADSjBgAQCCAPAAgAIAAGQGAAAAAAAAAAAAIGIAAACQBIAgCAUQAAEFgCQAAGYSQAKAAAAAAAAAAAAAAAAAAAAAAAAAAAAAA==	(2S)-6-amino-2-[[(2S)-1-[(2S,3S)-2-amino-3-methyl-pentanoyl]pyrrolidine-2-carbonyl]amino]hexanoic acid	(2S)-6-amino-2-[[[(2S)-1-[(2S,3S)-2-amino-3-methyl-1-oxopentyl]-2-pyrrolidinyl]-oxomethyl]amino]hexanoic acid	(2<I>S</I>)-6-amino-2-[[(2<I>S</I>)-1-[(2<I>S</I>,3<I>S</I>)-2-amino-3-methylpentanoyl]pyrrolidine-2-carbonyl]amino]hexanoic acid	(2S)-6-amino-2-[[(2S)-1-[(2S,3S)-2-amino-3-methylpentanoyl]pyrrolidine-2-carbonyl]amino]hexanoic acid	(2S)-6-azanyl-2-[[(2S)-1-[(2S,3S)-2-azanyl-3-methyl-pentanoyl]pyrrolidin-2-yl]carbonylamino]hexanoic acid	(2S)-6-amino-2-[[(2S)-1-[(2S,3S)-2-amino-3-methyl-pentanoyl]prolyl]amino]hexanoic acid	InChI=1S/C17H32N4O4/c1-3-11(2)14(19)16(23)21-10-6-8-13(21)15(22)20-12(17(24)25)7-4-5-9-18/h11-14H,3-10,18-19H2,1-2H3,(H,20,22)(H,24,25)/t11-,12-,13-,14-/m0/s1	NLZVTPYXYXMCIP-XUXIUFHCSA-N		356.242	C17H32N4O4	356.500	CCC(C)C(C(=O)N1CCCC1C(=O)NC(CCCCN)C(=O)O)N	CC[C@H](C)[C@@H](C(=O)N1CCC[C@H]1C(=O)N[C@@H](CCCCN)C(=O)O)N	139	356.242	0	25	4	0	0	0	0	1	-1	1 5 255	15 19 5 18 6 6 14 7 6 9 16 5	TRUE	0	C:\Users\qiang\Documents\Schrodinger\glide-dock_XP_346	glide-dock_XP_346_pv.maegz	1
441314	1849	Structure2D_COMPOUND_CID_441314.1	441314	1	179	6	5	3	AAADceByOAAAAAAAAAAAAAAAAAAAAAAAAAAsAAAAAAAAAAAAAAAAHgAACAAACDzhgAYAAAMAAgAAAAAAAAAAAAAAAAAAAAAIAAADEAIAgAAEQAAHAACRAAHwYAQAAAAAAAAAAAAAAAAAAAAAAAAAAAAAAA==	(2R,3R,4R,5S)-1-(2-hydroxyethyl)-2-(hydroxymethyl)piperidine-3,4,5-triol	(2R,3R,4R,5S)-1-(2-hydroxyethyl)-2-(hydroxymethyl)piperidine-3,4,5-triol	(2<I>R</I>,3<I>R</I>,4<I>R</I>,5<I>S</I>)-1-(2-hydroxyethyl)-2-(hydroxymethyl)piperidine-3,4,5-triol	(2R,3R,4R,5S)-1-(2-hydroxyethyl)-2-(hydroxymethyl)piperidine-3,4,5-triol	(2R,3R,4R,5S)-1-(2-hydroxyethyl)-2-(hydroxymethyl)piperidine-3,4,5-triol	(2R,3R,4R,5S)-1-(2-hydroxyethyl)-2-methylol-piperidine-3,4,5-triol	InChI=1S/C8H17NO5/c10-2-1-9-3-6(12)8(14)7(13)5(9)4-11/h5-8,10-14H,1-4H2/t5-,6+,7-,8-/m1/s1	IBAQFPQHRJAVAV-ULAWRXDQSA-N	-2.600	207.111	C8H17NO5	207.220	C1C(C(C(C(N1CCO)CO)O)O)O	C1[C@@H]([C@H]([C@@H]([C@H](N1CCO)CO)O)O)O	104	207.111	0	14	4	0	0	0	0	1	1	1 5 255	8 1 6 9 2 5 10 3 6 7 12 5	TRUE	0	C:\Users\qiang\Documents\Schrodinger\glide-dock_XP_346	glide-dock_XP_346_pv.maegz	1
9907532	1850	Structure2D_COMPOUND_CID_9907532.1	9907532	1	528	3	2	3	AAADceB7IQAEAAAAAAAAAAAAAAAAAWAAAAA8eLECAAAAAFgB/AAAHwAQAAAADQzhngYwxvPJlACgAyRiRACCiCAhIiAImSA+bJgMJuLEsZuGOCjm0BnI6AeQ0PMOoAAAAgACAABAAAAEAAQAAAAAAAAAAA==	2-(2-fluoro-2-quinuclidin-3-ylidene-ethoxy)-9H-carbazole;hydrochloride	2-[2-(1-azabicyclo[2.2.2]octan-3-ylidene)-2-fluoroethoxy]-9H-carbazole;hydrochloride	2-[2-(1-azabicyclo[2.2.2]octan-3-ylidene)-2-fluoroethoxy]-9<I>H</I>-carbazole;hydrochloride	2-[2-(1-azabicyclo[2.2.2]octan-3-ylidene)-2-fluoroethoxy]-9H-carbazole;hydrochloride	2-[2-(1-azabicyclo[2.2.2]octan-3-ylidene)-2-fluoranyl-ethoxy]-9H-carbazole;hydrochloride	2-(2-fluoro-2-quinuclidin-3-ylidene-ethoxy)-9H-carbazole;hydrochloride	InChI=1S/C21H21FN2O.ClH/c22-19(18-12-24-9-7-14(18)8-10-24)13-25-15-5-6-17-16-3-1-2-4-20(16)23-21(17)11-15;/h1-6,11,14,23H,7-10,12-13H2;1H	JWXYVHMBPISIJQ-UHFFFAOYSA-N		372.140	C21H22ClFN2O	372.900	C1CN2CCC1C(=C(COC3=CC4=C(C=C3)C5=CC=CC=C5N4)F)C2.Cl	C1CN2CCC1C(=C(COC3=CC4=C(C=C3)C5=CC=CC=C5N4)F)C2.Cl		372.140	0	26	0	0	0	1	0	2	-1	1 5 255	11 13 1 15 19 8 15 21 8 16 17 8 16 19 8 17 18 8 17 22 8 18 20 8 18 23 8 20 24 8 21 22 8 23 25 8 24 26 8 25 26 8 5 16 8 5 20 8	FALSE	0	C:\Users\qiang\Documents\Schrodinger\glide-dock_XP_346	glide-dock_XP_346_pv.maegz	1
21582559	1851	Structure2D_COMPOUND_CID_21582559.1	21582559	1	916	12	7	11	AAADceB4PAAAAAAAAAAAAAAAAAAAAAAAAAAwYMAAAAAAAAABUAAAGgAACAAADBSgmAIwDoAABgCIAiDSCAICCAAgIAAIiAFGiMgNJjKGMR6CeCOkwBELuYeI6LyOIAABAAAAQABAAAIAAACAAAAAAAAAAA==	2-[(E)-3-[3-[(Z)-1-carboxy-2-(3,4-dihydroxyphenyl)vinyloxy]-4-hydroxy-phenyl]prop-2-enoyl]oxy-3-(3,4-dihydroxyphenyl)propanoic acid	2-[(E)-3-[3-[(Z)-1-carboxy-2-(3,4-dihydroxyphenyl)ethenoxy]-4-hydroxyphenyl]-1-oxoprop-2-enoxy]-3-(3,4-dihydroxyphenyl)propanoic acid	2-[(<I>E</I>)-3-[3-[(<I>Z</I>)-1-carboxy-2-(3,4-dihydroxyphenyl)ethenoxy]-4-hydroxyphenyl]prop-2-enoyl]oxy-3-(3,4-dihydroxyphenyl)propanoic acid	2-[(E)-3-[3-[(Z)-1-carboxy-2-(3,4-dihydroxyphenyl)ethenoxy]-4-hydroxyphenyl]prop-2-enoyl]oxy-3-(3,4-dihydroxyphenyl)propanoic acid	3-[3,4-bis(oxidanyl)phenyl]-2-[(E)-3-[3-[(Z)-1-[3,4-bis(oxidanyl)phenyl]-3-oxidanyl-3-oxidanylidene-prop-1-en-2-yl]oxy-4-oxidanyl-phenyl]prop-2-enoyl]oxy-propanoic acid	2-[(E)-3-[3-[(Z)-1-carboxy-2-(3,4-dihydroxyphenyl)vinyloxy]-4-hydroxy-phenyl]acryloyl]oxy-3-(3,4-dihydroxyphenyl)propionic acid	InChI=1S/C27H22O12/c28-17-5-2-15(9-20(17)31)12-23(26(34)35)38-22-11-14(1-7-19(22)30)4-8-25(33)39-24(27(36)37)13-16-3-6-18(29)21(32)10-16/h1-12,24,28-32H,13H2,(H,34,35)(H,36,37)/b8-4+,23-12-	HFTLCJIFEZUOCR-JKXXRSRDSA-N	3.700	538.111	C27H22O12	538.500	C1=CC(=C(C=C1CC(C(=O)O)OC(=O)C=CC2=CC(=C(C=C2)O)OC(=CC3=CC(=C(C=C3)O)O)C(=O)O)O)O	C1=CC(=C(C=C1CC(C(=O)O)OC(=O)/C=C/C2=CC(=C(C=C2)O)O/C(=C\C3=CC(=C(C=C3)O)O)/C(=O)O)O)O	211	538.111	0	39	0	1	2	0	0	1	-1	1 5 255	14 13 3 15 16 8 15 17 8 16 19 8 17 20 8 19 21 8 20 21 8 23 25 8 23 28 8 24 25 8 24 29 8 28 30 8 29 30 8 31 34 8 31 35 8 34 36 8 35 37 8 36 38 8 37 38 8	TRUE	0	C:\Users\qiang\Documents\Schrodinger\glide-dock_XP_346	glide-dock_XP_346_pv.maegz	1
11782294	1852	Structure2D_COMPOUND_CID_11782294.1	11782294	1	383	10	6	2	AAADceBwPAAAAAAAAAAAAAAAAAAAASJAAAAkAAAAAAAAAAAAAAAAGgAACAAACBSggAIACAAABgAAAAAAAAAAAAAAAAAAAAAAAAAREAIAAAAiQAAFAAAHAAHAYAwAAAAAAAAAAAAAAAAAAAAAAAAAAAAAAA==	(1S,2S,3R,5S,8R,9S,10S,11R)-3,11-bis(hydroxymethyl)-4,7,12,14-tetraoxadispiro[4.2.48.25]tetradecane-1,2,9,10-tetrol	(1S,2S,3R,5S,8R,9S,10S,11R)-3,11-bis(hydroxymethyl)-4,7,12,14-tetraoxadispiro[4.2.48.25]tetradecane-1,2,9,10-tetrol	(1<I>S</I>,2<I>S</I>,3<I>R</I>,5<I>S</I>,8<I>R</I>,9<I>S</I>,10<I>S</I>,11<I>R</I>)-3,11-bis(hydroxymethyl)-4,7,12,14-tetraoxadispiro[4.2.4<SUP>8</SUP>.2<SUP>5</SUP>]tetradecane-1,2,9,10-tetrol	(1S,2S,3R,5S,8R,9S,10S,11R)-3,11-bis(hydroxymethyl)-4,7,12,14-tetraoxadispiro[4.2.48.25]tetradecane-1,2,9,10-tetrol	(1S,2S,3R,5S,8R,9S,10S,11R)-3,11-bis(hydroxymethyl)-4,7,12,14-tetraoxadispiro[4.2.48.25]tetradecane-1,2,9,10-tetrol	(1S,2S,3R,5S,8R,9S,10S,11R)-3,11-dimethylol-4,7,12,14-tetraoxadispiro[4.2.48.25]tetradecane-1,2,9,10-tetrol	InChI=1S/C12H20O10/c13-1-5-7(15)9(17)11(21-5)3-20-12(4-19-11)10(18)8(16)6(2-14)22-12/h5-10,13-18H,1-4H2/t5-,6-,7-,8-,9+,10+,11-,12+/m1/s1	DKOQIDXJOZQKIG-IYDDCBTQSA-N	-3.700	324.106	C12H20O10	324.280	C1C2(C(C(C(O2)CO)O)O)OCC3(O1)C(C(C(O3)CO)O)O	C1[C@@]2([C@H]([C@@H]([C@H](O2)CO)O)O)OC[C@@]3(O1)[C@H]([C@@H]([C@H](O3)CO)O)O	158	324.106	0	22	8	0	0	0	0	1	1	1 5 255	19 21 5 20 22 6 11 3 6 12 4 5 13 5 5 14 6 6 17 7 6 18 8 5	TRUE	0	C:\Users\qiang\Documents\Schrodinger\glide-dock_XP_346	glide-dock_XP_346_pv.maegz	1
9907532	1853	Structure2D_COMPOUND_CID_9907532 (1).1	9907532	1	528	3	2	3	AAADceB7IQAEAAAAAAAAAAAAAAAAAWAAAAA8eLECAAAAAFgB/AAAHwAQAAAADQzhngYwxvPJlACgAyRiRACCiCAhIiAImSA+bJgMJuLEsZuGOCjm0BnI6AeQ0PMOoAAAAgACAABAAAAEAAQAAAAAAAAAAA==	2-(2-fluoro-2-quinuclidin-3-ylidene-ethoxy)-9H-carbazole;hydrochloride	2-[2-(1-azabicyclo[2.2.2]octan-3-ylidene)-2-fluoroethoxy]-9H-carbazole;hydrochloride	2-[2-(1-azabicyclo[2.2.2]octan-3-ylidene)-2-fluoroethoxy]-9<I>H</I>-carbazole;hydrochloride	2-[2-(1-azabicyclo[2.2.2]octan-3-ylidene)-2-fluoroethoxy]-9H-carbazole;hydrochloride	2-[2-(1-azabicyclo[2.2.2]octan-3-ylidene)-2-fluoranyl-ethoxy]-9H-carbazole;hydrochloride	2-(2-fluoro-2-quinuclidin-3-ylidene-ethoxy)-9H-carbazole;hydrochloride	InChI=1S/C21H21FN2O.ClH/c22-19(18-12-24-9-7-14(18)8-10-24)13-25-15-5-6-17-16-3-1-2-4-20(16)23-21(17)11-15;/h1-6,11,14,23H,7-10,12-13H2;1H	JWXYVHMBPISIJQ-UHFFFAOYSA-N		372.140	C21H22ClFN2O	372.900	C1CN2CCC1C(=C(COC3=CC4=C(C=C3)C5=CC=CC=C5N4)F)C2.Cl	C1CN2CCC1C(=C(COC3=CC4=C(C=C3)C5=CC=CC=C5N4)F)C2.Cl		372.140	0	26	0	0	0	1	0	2	-1	1 5 255	11 13 1 15 19 8 15 21 8 16 17 8 16 19 8 17 18 8 17 22 8 18 20 8 18 23 8 20 24 8 21 22 8 23 25 8 24 26 8 25 26 8 5 16 8 5 20 8	FALSE	0	C:\Users\qiang\Documents\Schrodinger\glide-dock_XP_346	glide-dock_XP_346_pv.maegz	1
656512	1854	Structure2D_COMPOUND_CID_656512.1	656512	1	341	10	7	3	AAADceBwPAAAAAAAAAAAAAAAAAAAAAAAAAAkSAAAAAAAAAAAAAAAGgAACAAACBSwgAMACAAABgAAAAAAAAAAAAAAAAAAAAAAAAAREAIAAAAiQAAFAAAHAAHAYAwAAAAAAAAAAAAAAAAAAAAAAAAAAAAAAA==	(3R,4S,5S,6R)-6-(hydroxymethyl)-4-[(2R,3R,4S,5S)-3,4,5-trihydroxytetrahydropyran-2-yl]oxy-tetrahydropyran-2,3,5-triol	(3R,4S,5S,6R)-6-(hydroxymethyl)-4-[[(2R,3R,4S,5S)-3,4,5-trihydroxy-2-oxanyl]oxy]oxane-2,3,5-triol	(3<I>R</I>,4<I>S</I>,5<I>S</I>,6<I>R</I>)-6-(hydroxymethyl)-4-[(2<I>R</I>,3<I>R</I>,4<I>S</I>,5<I>S</I>)-3,4,5-trihydroxyoxan-2-yl]oxyoxane-2,3,5-triol	(3R,4S,5S,6R)-6-(hydroxymethyl)-4-[(2R,3R,4S,5S)-3,4,5-trihydroxyoxan-2-yl]oxyoxane-2,3,5-triol	(3R,4S,5S,6R)-6-(hydroxymethyl)-4-[(2R,3R,4S,5S)-3,4,5-tris(oxidanyl)oxan-2-yl]oxy-oxane-2,3,5-triol	(3R,4S,5S,6R)-6-methylol-4-[(2R,3R,4S,5S)-3,4,5-trihydroxytetrahydropyran-2-yl]oxy-tetrahydropyran-2,3,5-triol	InChI=1S/C11H20O10/c12-1-4-6(15)9(8(17)10(18)20-4)21-11-7(16)5(14)3(13)2-19-11/h3-18H,1-2H2/t3-,4+,5-,6-,7+,8+,9-,10?,11+/m0/s1	CKIPPJHUIHDREQ-TUJAQXOJSA-N	-4.100	312.106	C11H20O10	312.270	C1C(C(C(C(O1)OC2C(C(OC(C2O)O)CO)O)O)O)O	C1[C@@H]([C@@H]([C@H]([C@H](O1)O[C@H]2[C@H]([C@H](OC([C@@H]2O)O)CO)O)O)O)O	169	312.106	0	21	8	1	0	0	0	1	-1	1 5 255	11 1 5 15 1 6 14 21 5 12 4 5 13 5 6 16 6 6 17 7 3 18 8 5 19 9 5	TRUE	0	C:\Users\qiang\Documents\Schrodinger\glide-dock_XP_346	glide-dock_XP_346_pv.maegz	1
10508871	1855	Structure2D_COMPOUND_CID_10508871.1	10508871	1	920	15	7	25	AAADcfB8PAAAAAAAAAAAAAAAAAAAAAAAAAAkSAAAAAAAAAAAAAAAGgAACAAACBSwgAMCCAAABgCIACDSCAAAAAAgAAAICAEAAAgREBIAAQAiQAAFQAAPAAPI6KyAAAAAAAAAAAAAAAAAAAAAAAAAAAAAAA==	[(2S)-2-[(Z)-hex-3-enoyl]oxy-3-[(2R,3R,4S,5R,6R)-3,4,5-trihydroxy-6-[[(2S,3R,4S,5R,6R)-3,4,5-trihydroxy-6-(hydroxymethyl)tetrahydropyran-2-yl]oxymethyl]tetrahydropyran-2-yl]oxy-propyl] dodecanoate	dodecanoic acid [(2S)-2-[(Z)-1-oxohex-3-enoxy]-3-[[(2R,3R,4S,5R,6R)-3,4,5-trihydroxy-6-[[(2S,3R,4S,5R,6R)-3,4,5-trihydroxy-6-(hydroxymethyl)-2-oxanyl]oxymethyl]-2-oxanyl]oxy]propyl] ester	[(2<I>S</I>)-2-[(<I>Z</I>)-hex-3-enoyl]oxy-3-[(2<I>R</I>,3<I>R</I>,4<I>S</I>,5<I>R</I>,6<I>R</I>)-3,4,5-trihydroxy-6-[[(2<I>S</I>,3<I>R</I>,4<I>S</I>,5<I>R</I>,6<I>R</I>)-3,4,5-trihydroxy-6-(hydroxymethyl)oxan-2-yl]oxymethyl]oxan-2-yl]oxypropyl] dodecanoate	[(2S)-2-[(Z)-hex-3-enoyl]oxy-3-[(2R,3R,4S,5R,6R)-3,4,5-trihydroxy-6-[[(2S,3R,4S,5R,6R)-3,4,5-trihydroxy-6-(hydroxymethyl)oxan-2-yl]oxymethyl]oxan-2-yl]oxypropyl] dodecanoate	[(2S)-2-[(Z)-hex-3-enoyl]oxy-3-[(2R,3R,4S,5R,6R)-6-[[(2S,3R,4S,5R,6R)-6-(hydroxymethyl)-3,4,5-tris(oxidanyl)oxan-2-yl]oxymethyl]-3,4,5-tris(oxidanyl)oxan-2-yl]oxy-propyl] dodecanoate	lauric acid [(2S)-2-[(Z)-hex-3-enoyl]oxy-3-[(2R,3R,4S,5R,6R)-3,4,5-trihydroxy-6-[[(2S,3R,4S,5R,6R)-3,4,5-trihydroxy-6-methylol-tetrahydropyran-2-yl]oxymethyl]tetrahydropyran-2-yl]oxy-propyl] ester	InChI=1S/C33H58O15/c1-3-5-7-8-9-10-11-12-14-15-24(35)43-18-21(46-25(36)16-13-6-4-2)19-44-32-31(42)29(40)27(38)23(48-32)20-45-33-30(41)28(39)26(37)22(17-34)47-33/h6,13,21-23,26-34,37-42H,3-5,7-12,14-20H2,1-2H3/b13-6-/t21-,22-,23-,26+,27+,28+,29+,30-,31-,32-,33+/m1/s1	WMXPZMBCAXYUAO-OVAVGRNBSA-N	2.200	694.378	C33H58O15	694.800	CCCCCCCCCCCC(=O)OCC(COC1C(C(C(C(O1)COC2C(C(C(C(O2)CO)O)O)O)O)O)O)OC(=O)CC=CCC	CCCCCCCCCCCC(=O)OC[C@H](CO[C@H]1[C@@H]([C@H]([C@H]([C@H](O1)CO[C@@H]2[C@@H]([C@H]([C@H]([C@H](O2)CO)O)O)O)O)O)O)OC(=O)C/C=C\CC	231	694.378	0	48	11	0	1	0	0	1	-1	1 5 255	23 10 5 29 12 6 16 26 5 25 27 5 21 3 6 24 4 5 17 5 5 18 6 5 19 7 6 20 8 6 22 9 5	TRUE	0	C:\Users\qiang\Documents\Schrodinger\glide-dock_XP_346	glide-dock_XP_346_pv.maegz	1
103565340	1856	PubChem_substance_text_Polyporusterone B_records.13																								0									1 3	1 16 5 13 23 5 14 22 6 2 17 5 24 37 6 26 36 5 27 28 6 5 19 5 6 18 5 9 20 6	TRUE	0	C:\Users\qiang\Documents\Schrodinger\glide-dock_XP_346	glide-dock_XP_346_pv.maegz	13	0	103565340	9	ChEMBL	CHEMBL404770	POLYPORUSTERONE A CHEMBL404770	CHEMBL404770	https://www.ebi.ac.uk/chembl/
11765414	1857	Structure2D_COMPOUND_CID_11765414.1	11765414	1	1320	16	10	13	AAADceB8PgAAAAAAAAAAAAAAAAAAAAAAAAAwYMGCAAAAAACBVAAAGgAACAAADRSgmAIwDoAABgCIAiDSCAICAAAgIAAIiAFGiMgJJjKCNRaCcAEkwBELuYfK7vzOoAABAAAYQABAAAIAADCAAAAAAAAAAA==	2-[3-[1-carboxy-2-(3,4-dihydroxyphenyl)ethoxy]carbonyl-2-(3,4-dihydroxyphenyl)-7,8-dihydroxy-1,2-dihydronaphthalene-1-carbonyl]oxy-3-(3,4-dihydroxyphenyl)propanoic acid	2-[[3-[[1-carboxy-2-(3,4-dihydroxyphenyl)ethoxy]-oxomethyl]-2-(3,4-dihydroxyphenyl)-7,8-dihydroxy-1,2-dihydronaphthalen-1-yl]-oxomethoxy]-3-(3,4-dihydroxyphenyl)propanoic acid	2-[3-[1-carboxy-2-(3,4-dihydroxyphenyl)ethoxy]carbonyl-2-(3,4-dihydroxyphenyl)-7,8-dihydroxy-1,2-dihydronaphthalene-1-carbonyl]oxy-3-(3,4-dihydroxyphenyl)propanoic acid	2-[3-[1-carboxy-2-(3,4-dihydroxyphenyl)ethoxy]carbonyl-2-(3,4-dihydroxyphenyl)-7,8-dihydroxy-1,2-dihydronaphthalene-1-carbonyl]oxy-3-(3,4-dihydroxyphenyl)propanoic acid	3-[3,4-bis(oxidanyl)phenyl]-2-[[2-[3,4-bis(oxidanyl)phenyl]-3-[3-[3,4-bis(oxidanyl)phenyl]-1-oxidanyl-1-oxidanylidene-propan-2-yl]oxycarbonyl-7,8-bis(oxidanyl)-1,2-dihydronaphthalen-1-yl]carbonyloxy]propanoic acid	2-[3-[1-carboxy-2-(3,4-dihydroxyphenyl)ethoxy]carbonyl-2-(3,4-dihydroxyphenyl)-7,8-dihydroxy-1,2-dihydronaphthalene-1-carbonyl]oxy-3-(3,4-dihydroxyphenyl)propionic acid	InChI=1S/C36H30O16/c37-20-5-1-15(9-24(20)41)11-27(33(45)46)51-35(49)19-13-17-4-8-23(40)32(44)30(17)31(29(19)18-3-7-22(39)26(43)14-18)36(50)52-28(34(47)48)12-16-2-6-21(38)25(42)10-16/h1-10,13-14,27-29,31,37-44H,11-12H2,(H,45,46)(H,47,48)	CLZDRNKNWXDFQT-UHFFFAOYSA-N	3.900	718.153	C36H30O16	718.600	C1=CC(=C(C=C1CC(C(=O)O)OC(=O)C2C(C(=CC3=C2C(=C(C=C3)O)O)C(=O)OC(CC4=CC(=C(C=C4)O)O)C(=O)O)C5=CC(=C(C=C5)O)O)O)O	C1=CC(=C(C=C1CC(C(=O)O)OC(=O)C2C(C(=CC3=C2C(=C(C=C3)O)O)C(=O)OC(CC4=CC(=C(C=C4)O)O)C(=O)O)C5=CC(=C(C=C5)O)O)O)O	289	718.153	0	52	0	4	0	0	0	1	-1	1 5 255	17 22 3 18 24 3 19 21 8 19 25 8 21 26 8 22 28 8 22 29 8 25 30 8 26 31 8 28 33 8 29 34 8 30 31 8 32 36 3 33 35 8 34 35 8 37 38 3 40 43 8 40 44 8 41 45 8 41 46 8 43 47 8 44 48 8 45 50 8 46 51 8 47 49 8 48 49 8 50 52 8 51 52 8	TRUE	0	C:\Users\qiang\Documents\Schrodinger\glide-dock_XP_346	glide-dock_XP_346_pv.maegz	1
440772	1858	Structure2D_COMPOUND_CID_440772.1	440772	1	523	9	8	17	AAADcfB7uABAAAAAAAAAAAAAAAAAAAAAAAAAAAAAAAAAAAAAAAAAHgQQCAAACCjFwASACALAAgQIAAGQGAAAAAAAAAAAAIGIAAACQBIAwCAUQAAEFgCAAACcFwIAAAAAAAAAAAAAAAAAAAAAAAAAAAAAAA==	(2S)-2-amino-5-[[(1R)-2-[[2-[3-(4-aminobutylamino)propylamino]-2-oxo-ethyl]amino]-2-oxo-1-(sulfanylmethyl)ethyl]amino]-5-oxo-pentanoic acid	(2S)-2-amino-5-[[(2R)-1-[[2-[3-(4-aminobutylamino)propylamino]-2-oxoethyl]amino]-3-mercapto-1-oxopropan-2-yl]amino]-5-oxopentanoic acid	(2<I>S</I>)-2-amino-5-[[(2<I>R</I>)-1-[[2-[3-(4-aminobutylamino)propylamino]-2-oxoethyl]amino]-1-oxo-3-sulfanylpropan-2-yl]amino]-5-oxopentanoic acid	(2S)-2-amino-5-[[(2R)-1-[[2-[3-(4-aminobutylamino)propylamino]-2-oxoethyl]amino]-1-oxo-3-sulfanylpropan-2-yl]amino]-5-oxopentanoic acid	(2S)-2-azanyl-5-[[(2R)-1-[[2-[3-(4-azanylbutylamino)propylamino]-2-oxidanylidene-ethyl]amino]-1-oxidanylidene-3-sulfanyl-propan-2-yl]amino]-5-oxidanylidene-pentanoic acid	(2S)-2-amino-5-[[(1R)-2-[[2-[3-(4-aminobutylamino)propylamino]-2-keto-ethyl]amino]-2-keto-1-(mercaptomethyl)ethyl]amino]-5-keto-valeric acid	InChI=1S/C17H34N6O5S/c18-6-1-2-7-20-8-3-9-21-15(25)10-22-16(26)13(11-29)23-14(24)5-4-12(19)17(27)28/h12-13,20,29H,1-11,18-19H2,(H,21,25)(H,22,26)(H,23,24)(H,27,28)/t12-,13-/m0/s1	NEDQLXHBVHSKNV-STQMWFEESA-N		434.231	C17H34N6O5S	434.600	C(CCNCCCNC(=O)CNC(=O)C(CS)NC(=O)CCC(C(=O)O)N)CN	C(CCNCCCNC(=O)CNC(=O)[C@H](CS)NC(=O)CC[C@@H](C(=O)O)N)CN	190	434.231	0	29	2	0	0	0	0	1	-1	1 5 255	22 11 5 19 8 6	TRUE	0	C:\Users\qiang\Documents\Schrodinger\glide-dock_XP_346	glide-dock_XP_346_pv.maegz	1
481576269	1859	PubChem_substance_text_Polyporusterone B_records.24																								0									1 3	2 1 6 12 13 5 14 15 5 20 21 5 22 23 5 22 36 6 23 24 5 23 33 6 24 31 6 26 30 6 4 37 6 5 6 5 7 17 5	TRUE	0	C:\Users\qiang\Documents\Schrodinger\glide-dock_XP_346	glide-dock_XP_346_pv.maegz	24	0	481576269	1	AKos Consulting & Solutions	AKOS040763739	AKOS040763739 Polyporusterone A 141360-88-5	AKOS040763739	http://www.akosgmbh.de/AKosSamples/index.html
25128229	1860	Structure2D_COMPOUND_CID_25128229.1	25128229	1	704	8	9	16	AAADcfB7+AAAAAAAAAAAAAAAAAAAAAAAAAAAAAAAAAAAAAAAAAAAHgAQCAAACCjBgAQBCALAAgAoAAGQPAAAAAEAAAAAAIGIAAACQBIAgCAUQAAEFgCQAACcFwAAAAAAAAAAAAAAAAAAAAAAAAAAAAAAAA==	(2S)-5-amino-2-[[(2S)-2-[[(2S)-2-amino-5-guanidino-pentanoyl]amino]-5-guanidino-pentanoyl]amino]-5-oxo-pentanoic acid	(2S)-5-amino-2-[[(2S)-2-[[(2S)-2-amino-5-(diaminomethylideneamino)-1-oxopentyl]amino]-5-(diaminomethylideneamino)-1-oxopentyl]amino]-5-oxopentanoic acid	(2<I>S</I>)-5-amino-2-[[(2<I>S</I>)-2-[[(2<I>S</I>)-2-amino-5-(diaminomethylideneamino)pentanoyl]amino]-5-(diaminomethylideneamino)pentanoyl]amino]-5-oxopentanoic acid	(2S)-5-amino-2-[[(2S)-2-[[(2S)-2-amino-5-(diaminomethylideneamino)pentanoyl]amino]-5-(diaminomethylideneamino)pentanoyl]amino]-5-oxopentanoic acid	(2S)-5-azanyl-2-[[(2S)-2-[[(2S)-2-azanyl-5-[bis(azanyl)methylideneamino]pentanoyl]amino]-5-[bis(azanyl)methylideneamino]pentanoyl]amino]-5-oxidanylidene-pentanoic acid	(2S)-5-amino-2-[[(2S)-2-[[(2S)-2-amino-5-guanidino-pentanoyl]amino]-5-guanidino-pentanoyl]amino]-5-keto-valeric acid	InChI=1S/C17H34N10O5/c18-9(3-1-7-24-16(20)21)13(29)26-10(4-2-8-25-17(22)23)14(30)27-11(15(31)32)5-6-12(19)28/h9-11H,1-8,18H2,(H2,19,28)(H,26,29)(H,27,30)(H,31,32)(H4,20,21,24)(H4,22,23,25)/t9-,10-,11-/m0/s1	MUXONAMCEUBVGA-DCAQKATOSA-N	-7.100	458.271	C17H34N10O5	458.500	C(CC(C(=O)NC(CCCN=C(N)N)C(=O)NC(CCC(=O)N)C(=O)O)N)CN=C(N)N	C(C[C@@H](C(=O)N[C@@H](CCCN=C(N)N)C(=O)N[C@@H](CCC(=O)N)C(=O)O)N)CN=C(N)N	293	458.271	0	32	3	0	0	0	0	1	-1	1 5 255	16 6 6 22 7 5 19 8 5	TRUE	0	C:\Users\qiang\Documents\Schrodinger\glide-dock_XP_346	glide-dock_XP_346_pv.maegz	1
14312558	1861	Structure2D_COMPOUND_CID_14312558.1	14312558	1	516	10	6	7	AAADceB4PAAAAAAAAAAAAAAAAAAAAAAAAAA0SIAAAAAAAAABAAAAGgAACAAADBSwmAMyCIAABgCAAiBCAAACAAAgAAAIiAAAAIgZMCKAERCiYAAlwAEPiAfA4KwOAAAAAAAAAAAAAAAAAAAAAAAAAAAAAA==	2-methyl-6-[[3,4,5-trihydroxy-6-(2-phenylethoxy)tetrahydropyran-2-yl]methoxy]tetrahydropyran-3,4,5-triol	2-methyl-6-[[3,4,5-trihydroxy-6-(2-phenylethoxy)-2-oxanyl]methoxy]oxane-3,4,5-triol	2-methyl-6-[[3,4,5-trihydroxy-6-(2-phenylethoxy)oxan-2-yl]methoxy]oxane-3,4,5-triol	2-methyl-6-[[3,4,5-trihydroxy-6-(2-phenylethoxy)oxan-2-yl]methoxy]oxane-3,4,5-triol	2-methyl-6-[[3,4,5-tris(oxidanyl)-6-(2-phenylethoxy)oxan-2-yl]methoxy]oxane-3,4,5-triol	2-methyl-6-[(3,4,5-trihydroxy-6-phenethoxy-tetrahydropyran-2-yl)methoxy]tetrahydropyran-3,4,5-triol	InChI=1S/C20H30O10/c1-10-13(21)15(23)17(25)20(29-10)28-9-12-14(22)16(24)18(26)19(30-12)27-8-7-11-5-3-2-4-6-11/h2-6,10,12-26H,7-9H2,1H3	OKUGUNDXBGUFPA-UHFFFAOYSA-N	-1.700	430.184	C20H30O10	430.400	CC1C(C(C(C(O1)OCC2C(C(C(C(O2)OCCC3=CC=CC=C3)O)O)O)O)O)O	CC1C(C(C(C(O1)OCC2C(C(C(C(O2)OCCC3=CC=CC=C3)O)O)O)O)O)O	158	430.184	0	30	0	10	0	0	0	1	-1	1 5 255	18 10 3 11 20 3 16 2 3 21 22 3 25 26 8 25 27 8 26 28 8 27 29 8 28 30 8 29 30 8 12 4 3 19 5 3 13 6 3 14 7 3 15 8 3 17 9 3	TRUE	0	C:\Users\qiang\Documents\Schrodinger\glide-dock_XP_346	glide-dock_XP_346_pv.maegz	1
10559369	1862	Structure2D_COMPOUND_CID_10559369.1	10559369	1	203	3	0	2	AAADceByMAAAAAAAAAAAAAAAAAAAAWAAAAAsAAAABgAAAAAAAAAAHgAAAAAACDzhgAYCCAMABAAIAACQCAAAAAAAAAAAAAAIAAAAAAIAgAAGAAAGAACAAAGQwCAAAAAAAAAAAAAAAAAAAAAAAAAAAAAAAA==	[(1S,5R)-8-methyl-8-azabicyclo[3.2.1]octan-3-yl] acetate	acetic acid [(1S,5R)-8-methyl-8-azabicyclo[3.2.1]octan-3-yl] ester	[(1<I>S</I>,5<I>R</I>)-8-methyl-8-azabicyclo[3.2.1]octan-3-yl] acetate	[(1S,5R)-8-methyl-8-azabicyclo[3.2.1]octan-3-yl] acetate	[(1S,5R)-8-methyl-8-azabicyclo[3.2.1]octan-3-yl] ethanoate	acetic acid [(1S,5R)-8-methyl-8-azabicyclo[3.2.1]octan-3-yl] ester	InChI=1S/C10H17NO2/c1-7(12)13-10-5-8-3-4-9(6-10)11(8)2/h8-10H,3-6H2,1-2H3/t8-,9+,10?	MDIDMOWWLBGYPG-ULKQDVFKSA-N	1.300	183.126	C10H17NO2	183.250	CC(=O)OC1CC2CCC(C1)N2C	CC(=O)OC1C[C@H]2CC[C@@H](C1)N2C		183.126	0	13	2	0	0	0	0	1	-1	1 5 255	4 14 5 5 15 6	TRUE	0	C:\Users\qiang\Documents\Schrodinger\glide-dock_XP_346	glide-dock_XP_346_pv.maegz	1
78187444	1863	Structure2D_COMPOUND_CID_78187444.1	78187444	1	1260	16	10	6	AAADcfB8PgAAAAAAAAAAAAAAAAAAAAAAAAA0aNGCAAAAAACRVAAAGgAACAAADRSwmAMwDoAABgCIAqBSAAACCAAkIAAIiAEGiMgdNzaGNRqieWGl4BUPuQfK7PzOoAADCAAIQABAAAYQABCAAAAAAAAAAA==	8-[5,7-dihydroxy-2-(4-hydroxyphenyl)-4-oxo-chroman-3-yl]-2-(3,4-dihydroxyphenyl)-5-hydroxy-7-[3,4,5-trihydroxy-6-(hydroxymethyl)tetrahydropyran-2-yl]oxy-chroman-4-one	8-[5,7-dihydroxy-2-(4-hydroxyphenyl)-4-oxo-3,4-dihydro-2H-1-benzopyran-3-yl]-2-(3,4-dihydroxyphenyl)-5-hydroxy-7-[[3,4,5-trihydroxy-6-(hydroxymethyl)-2-oxanyl]oxy]-3,4-dihydro-2H-1-benzopyran-4-one	8-[5,7-dihydroxy-2-(4-hydroxyphenyl)-4-oxo-2,3-dihydrochromen-3-yl]-2-(3,4-dihydroxyphenyl)-5-hydroxy-7-[3,4,5-trihydroxy-6-(hydroxymethyl)oxan-2-yl]oxy-2,3-dihydrochromen-4-one	8-[5,7-dihydroxy-2-(4-hydroxyphenyl)-4-oxo-2,3-dihydrochromen-3-yl]-2-(3,4-dihydroxyphenyl)-5-hydroxy-7-[3,4,5-trihydroxy-6-(hydroxymethyl)oxan-2-yl]oxy-2,3-dihydrochromen-4-one	2-[3,4-bis(oxidanyl)phenyl]-7-[6-(hydroxymethyl)-3,4,5-tris(oxidanyl)oxan-2-yl]oxy-8-[2-(4-hydroxyphenyl)-5,7-bis(oxidanyl)-4-oxidanylidene-2,3-dihydrochromen-3-yl]-5-oxidanyl-2,3-dihydrochromen-4-one	8-[5,7-dihydroxy-2-(4-hydroxyphenyl)-4-keto-chroman-3-yl]-2-(3,4-dihydroxyphenyl)-5-hydroxy-7-(3,4,5-trihydroxy-6-methylol-tetrahydropyran-2-yl)oxy-chroman-4-one	InChI=1S/C36H32O16/c37-12-25-30(45)32(47)33(48)36(52-25)51-24-11-21(44)26-20(43)10-22(14-3-6-17(40)18(41)7-14)49-35(26)28(24)29-31(46)27-19(42)8-16(39)9-23(27)50-34(29)13-1-4-15(38)5-2-13/h1-9,11,22,25,29-30,32-34,36-42,44-45,47-48H,10,12H2	XGQOXAVFFQEOBL-UHFFFAOYSA-N	2.400	720.169	C36H32O16	720.600	C1C(OC2=C(C1=O)C(=CC(=C2C3C(OC4=CC(=CC(=C4C3=O)O)O)C5=CC=C(C=C5)O)OC6C(C(C(C(O6)CO)O)O)O)O)C7=CC(=C(C=C7)O)O	C1C(OC2=C(C1=O)C(=CC(=C2C3C(OC4=CC(=CC(=C4C3=O)O)O)C5=CC=C(C=C5)O)OC6C(C(C(C(O6)CO)O)O)O)O)C7=CC(=C(C=C7)O)O	273	720.169	0	52	0	8	0	0	0	1	-1	1 5 255	20 2 3 21 27 3 22 23 3 23 25 8 23 26 8 24 31 3 25 33 8 26 29 8 29 35 8 30 38 3 31 40 8 31 41 8 32 37 8 32 39 8 33 35 8 37 42 8 38 45 8 38 46 8 39 43 8 40 47 8 41 48 8 42 44 8 43 44 8 45 50 8 46 51 8 47 49 8 48 49 8 17 5 3 50 52 8 51 52 8 18 6 3 19 7 3	TRUE	0	C:\Users\qiang\Documents\Schrodinger\glide-dock_XP_346	glide-dock_XP_346_pv.maegz	1
102153520	1864	Structure2D_COMPOUND_CID_102153520.1	102153520	1	863	8	3	21	AAADcfB8PAAAAAAAAAAAAAAAAAAAASJEiAAAAAAAAAAAAAAAAAAAGgAACAAADBSggAICCAAABgCIAiDSCAAAAAAgAAAACAEAAEgBFBIAIQACUAAEwAALIYPK6KyAAAAAAAAAAAAAAAAAAAAAAAAAAAAAAA==	4-[2,13-dihydroxy-13-[5-[5-[5-(1-hydroxyhexyl)tetrahydrofuran-2-yl]tetrahydrofuran-2-yl]tetrahydrofuran-2-yl]tridecyl]-2-methyl-2H-furan-5-one	4-[2,13-dihydroxy-13-[5-[5-[5-(1-hydroxyhexyl)-2-oxolanyl]-2-oxolanyl]-2-oxolanyl]tridecyl]-2-methyl-2H-furan-5-one	4-[2,13-dihydroxy-13-[5-[5-[5-(1-hydroxyhexyl)oxolan-2-yl]oxolan-2-yl]oxolan-2-yl]tridecyl]-2-methyl-2<I>H</I>-furan-5-one	4-[2,13-dihydroxy-13-[5-[5-[5-(1-hydroxyhexyl)oxolan-2-yl]oxolan-2-yl]oxolan-2-yl]tridecyl]-2-methyl-2H-furan-5-one	4-[2,13-bis(oxidanyl)-13-[5-[5-[5-(1-oxidanylhexyl)oxolan-2-yl]oxolan-2-yl]oxolan-2-yl]tridecyl]-2-methyl-2H-furan-5-one	4-[2,13-dihydroxy-13-[5-[5-[5-(1-hydroxyhexyl)tetrahydrofuran-2-yl]tetrahydrofuran-2-yl]tetrahydrofuran-2-yl]tridecyl]-2-methyl-2H-furan-5-one	InChI=1S/C36H62O8/c1-3-4-11-15-28(38)30-17-19-32(42-30)34-21-22-35(44-34)33-20-18-31(43-33)29(39)16-13-10-8-6-5-7-9-12-14-27(37)24-26-23-25(2)41-36(26)40/h23,25,27-35,37-39H,3-22,24H2,1-2H3	LSLPYJYSYKQINA-UHFFFAOYSA-N	7.500	622.444	C36H62O8	622.900	CCCCCC(C1CCC(O1)C2CCC(O2)C3CCC(O3)C(CCCCCCCCCCC(CC4=CC(OC4=O)C)O)O)O	CCCCCC(C1CCC(O1)C2CCC(O2)C3CCC(O3)C(CCCCCCCCCCC(CC4=CC(OC4=O)C)O)O)O	115	622.444	0	44	0	10	0	0	0	1	-1	1 5 255	10 14 3 11 15 3 12 16 3 17 19 3 18 20 3 21 4 3 42 44 3 22 5 3 38 6 3 9 13 3	TRUE	0	C:\Users\qiang\Documents\Schrodinger\glide-dock_XP_346	glide-dock_XP_346_pv.maegz	1
160355	1865	Structure2D_COMPOUND_CID_160355.1	160355	1	417	6	3	8	AAADceB7oAAAAAAAAAAAAAAAAAAAAWAAAAA8QAAAAAAAAFgB/AAAHgAQCAAADCjhnwY38L/MEgCgAyZjZACCgC0xEKAJ2KAoVJiKeCLA2VGUZAhskALYiCcQgAAOAAAAAAAAAAAAAAAAAAAAAAAAAAAAAA==	(2R)-2-[[6-(benzylamino)-9-isopropyl-purin-2-yl]amino]butan-1-ol	(2R)-2-[[6-[(phenylmethyl)amino]-9-propan-2-yl-2-purinyl]amino]-1-butanol	(2<I>R</I>)-2-[[6-(benzylamino)-9-propan-2-ylpurin-2-yl]amino]butan-1-ol	(2R)-2-[[6-(benzylamino)-9-propan-2-ylpurin-2-yl]amino]butan-1-ol	(2R)-2-[[6-[(phenylmethyl)amino]-9-propan-2-yl-purin-2-yl]amino]butan-1-ol	(2R)-2-[[6-(benzylamino)-9-isopropyl-purin-2-yl]amino]butan-1-ol	InChI=1S/C19H26N6O/c1-4-15(11-26)22-19-23-17(20-10-14-8-6-5-7-9-14)16-18(24-19)25(12-21-16)13(2)3/h5-9,12-13,15,26H,4,10-11H2,1-3H3,(H2,20,22,23,24)/t15-/m1/s1	BTIHMVBBUGXLCJ-OAHLLOKOSA-N	3.200	354.217	C19H26N6O	354.400	CCC(CO)NC1=NC(=C2C(=N1)N(C=N2)C(C)C)NCC3=CC=CC=C3	CC[C@H](CO)NC1=NC(=C2C(=N1)N(C=N2)C(C)C)NCC3=CC=CC=C3		354.217	0	26	1	0	0	0	0	1	6	1 5 255	10 11 8 11 13 8 2 10 8 2 15 8 21 22 8 21 23 8 22 24 8 23 25 8 24 26 8 25 26 8 9 3 6 4 10 8 4 14 8 5 11 8 5 15 8 6 13 8 6 14 8	TRUE	0	C:\Users\qiang\Documents\Schrodinger\glide-dock_XP_346	glide-dock_XP_346_pv.maegz	1
145458422	1866	Structure2D_COMPOUND_CID_145458422.1	145458422	1	610	5	5	10	AAADcfB7uAAAAAAAAAAAAAAAAAAAAWAAAAAwAAAAAAAAAFgB8AAAHgAQCAAADSjBngQ+yPLJkgCoAzX3XACCgCAxAiAI2aG4ZJgKYPLAkbGUYAhklgDYyAcYicCOgAAAAAACAAAAAAAAAAQAAAAAAAAAAA==	(2S)-2-[[(2S)-2-[[(2S)-2-amino-3-(1H-indol-3-yl)propanoyl]amino]-4-methyl-pentanoyl]amino]-3-methyl-butanoic acid	(2S)-2-[[(2S)-2-[[(2S)-2-amino-3-(1H-indol-3-yl)-1-oxopropyl]amino]-4-methyl-1-oxopentyl]amino]-3-methylbutanoic acid	(2<I>S</I>)-2-[[(2<I>S</I>)-2-[[(2<I>S</I>)-2-amino-3-(1<I>H</I>-indol-3-yl)propanoyl]amino]-4-methylpentanoyl]amino]-3-methylbutanoic acid	(2S)-2-[[(2S)-2-[[(2S)-2-amino-3-(1H-indol-3-yl)propanoyl]amino]-4-methylpentanoyl]amino]-3-methylbutanoic acid	(2S)-2-[[(2S)-2-[[(2S)-2-azanyl-3-(1H-indol-3-yl)propanoyl]amino]-4-methyl-pentanoyl]amino]-3-methyl-butanoic acid	(2S)-2-[[(2S)-2-[[(2S)-2-amino-3-(1H-indol-3-yl)propanoyl]amino]-4-methyl-pentanoyl]amino]-3-methyl-butyric acid	InChI=1S/C22H32N4O4/c1-12(2)9-18(21(28)26-19(13(3)4)22(29)30)25-20(27)16(23)10-14-11-24-17-8-6-5-7-15(14)17/h5-8,11-13,16,18-19,24H,9-10,23H2,1-4H3,(H,25,27)(H,26,28)(H,29,30)/t16-,18-,19-/m0/s1	WMBFONUKQXGLMU-WDSOQIARSA-N		416.242	C22H32N4O4	416.500	CC(C)CC(C(=O)NC(C(C)C)C(=O)O)NC(=O)C(CC1=CNC2=CC=CC=C21)N	CC(C)C[C@@H](C(=O)N[C@@H](C(C)C)C(=O)O)NC(=O)[C@H](CC1=CNC2=CC=CC=C21)N	137	416.242	0	30	3	0	0	0	0	1	-1	1 5 255	20 23 8 20 26 8 23 25 8 23 27 8 25 28 8 27 29 8 28 30 8 29 30 8 9 5 5 12 6 5 15 7 5 8 25 8 8 26 8	TRUE	0	C:\Users\qiang\Documents\Schrodinger\glide-dock_XP_346	glide-dock_XP_346_pv.maegz	1
75046985	1867	Structure2D_COMPOUND_CID_75046985.1	75046985	1	432	9	8	8	AAADceBzuAAAAAAAAAAAAAAAAAAAAAAAAAAkAAAAAAAAAAAAAAAAHgAQCAAACDzhgAYBCALABgAoAACQLAAAAAEAAAAAAIGIAAATEBIAgCAHQAAHEACXAAH4cQYAAAAAAAAAAAAAAAAAAAAAAAAAAAAAAA==	5-guanidino-2-[(2,3,4,5-tetrahydroxytetrahydropyran-2-yl)methylamino]pentanoic acid	5-(diaminomethylideneamino)-2-[(2,3,4,5-tetrahydroxy-2-oxanyl)methylamino]pentanoic acid	5-(diaminomethylideneamino)-2-[(2,3,4,5-tetrahydroxyoxan-2-yl)methylamino]pentanoic acid	5-(diaminomethylideneamino)-2-[(2,3,4,5-tetrahydroxyoxan-2-yl)methylamino]pentanoic acid	5-[bis(azanyl)methylideneamino]-2-[[2,3,4,5-tetrakis(oxidanyl)oxan-2-yl]methylamino]pentanoic acid	5-guanidino-2-[(2,3,4,5-tetrahydroxytetrahydropyran-2-yl)methylamino]valeric acid	InChI=1S/C12H24N4O7/c13-11(14)15-3-1-2-6(10(20)21)16-5-12(22)9(19)8(18)7(17)4-23-12/h6-9,16-19,22H,1-5H2,(H,20,21)(H4,13,14,15)	DLFIWFDONDYZKI-UHFFFAOYSA-N	-6.100	336.164	C12H24N4O7	336.340	C1C(C(C(C(O1)(CNC(CCCN=C(N)N)C(=O)O)O)O)O)O	C1C(C(C(C(O1)(CNC(CCCN=C(N)N)C(=O)O)O)O)O)O	204	336.164	0	23	0	5	0	0	0	1	-1	1 5 255	18 19 3 12 2 3 13 3 3 14 4 3 15 5 3	TRUE	0	C:\Users\qiang\Documents\Schrodinger\glide-dock_XP_346	glide-dock_XP_346_pv.maegz	1
461510965	1868	PubChem_substance_text_Polyporusterone B_records.7																								0									1 3	1 33 5 12 11 5 13 21 6 13 31 5 14 30 5 16 17 5 2 34 5 22 23 5 26 36 6 27 28 5 5 35 5 9 32 6	TRUE	0	C:\Users\qiang\Documents\Schrodinger\glide-dock_XP_346	glide-dock_XP_346_pv.maegz	7	0	461510965	1	959	HY-N7692	Polyporusterone A HY-N7692	HY-N7692	https://www.medchemexpress.com/
463567041	1869	PubChem_substance_text_Polyporusterone B_records.49																								0									1 3	1 33 5 12 11 5 13 21 6 13 31 5 14 30 5 16 17 5 2 34 5 22 23 5 26 36 6 27 28 5 5 35 5 9 32 6	TRUE	0	C:\Users\qiang\Documents\Schrodinger\glide-dock_XP_346	glide-dock_XP_346_pv.maegz	49	0	463567041	2	1010	CS-0135219	Polyporusterone A CS-0135219	CS-0135219	https://www.chemscene.com/
6440659	1870	Structure2D_COMPOUND_CID_6440659.1	6440659	1	391	4	3	6	AAADceB6OAAAAAAAAAAAAAAAAAAAAAAAAAAwYAAAAAAAAAABQAAAHgAQCAAADATBmAYyBoLABgCIAiFSEACCCAAgIAAIiIAOiMgNJiKGsRuEcCMk1hGLuYeQwJAOIAABAAAAQABAAAIAAACAAAAAAAAAAA==	(Z)-3-(4-hydroxy-3-methoxy-phenyl)-N-[2-(4-hydroxyphenyl)ethyl]prop-2-enamide	(Z)-3-(4-hydroxy-3-methoxyphenyl)-N-[2-(4-hydroxyphenyl)ethyl]-2-propenamide	(<I>Z</I>)-3-(4-hydroxy-3-methoxyphenyl)-<I>N</I>-[2-(4-hydroxyphenyl)ethyl]prop-2-enamide	(Z)-3-(4-hydroxy-3-methoxyphenyl)-N-[2-(4-hydroxyphenyl)ethyl]prop-2-enamide	(Z)-N-[2-(4-hydroxyphenyl)ethyl]-3-(3-methoxy-4-oxidanyl-phenyl)prop-2-enamide	(Z)-3-(4-hydroxy-3-methoxy-phenyl)-N-[2-(4-hydroxyphenyl)ethyl]acrylamide	InChI=1S/C18H19NO4/c1-23-17-12-14(4-8-16(17)21)5-9-18(22)19-11-10-13-2-6-15(20)7-3-13/h2-9,12,20-21H,10-11H2,1H3,(H,19,22)/b9-5-	NPNNKDMSXVRADT-UITAMQMPSA-N		313.131	C18H19NO4	313.300	COC1=C(C=CC(=C1)C=CC(=O)NCCC2=CC=C(C=C2)O)O	COC1=C(C=CC(=C1)/C=C\C(=O)NCCC2=CC=C(C=C2)O)O		313.131	0	23	0	0	1	0	0	1	18	1 5 255	10 12 8 11 15 8 12 15 8 14 18 8 14 20 8 18 19 8 19 21 8 20 22 8 21 22 8 8 10 8 8 9 8 9 11 8	FALSE	0	C:\Users\qiang\Documents\Schrodinger\glide-dock_XP_346	glide-dock_XP_346_pv.maegz	1
67309075	1871	Structure2D_COMPOUND_CID_67309075.1	67309075	1	604	7	6	12	AAADceB7uAAAAAAAAAAAAAAAAAAAAAAAAAAwAAAAAAAAAAABAAAAHgAQCAAADSzBmAQyDoLAAgCIAiHSGAACAAAgIAAIiIGOCIgKZjKCkTOUcAAk1hGYmAecy6COIAAAAAAAAABAAAAAAAAAAAAAAAAAAA==	(2S)-2-[[(2S)-2-[[(2S)-2,5-diamino-5-oxo-pentanoyl]amino]-3-(4-hydroxyphenyl)propanoyl]amino]-4-methyl-pentanoic acid	(2S)-2-[[(2S)-2-[[(2S)-2,5-diamino-1,5-dioxopentyl]amino]-3-(4-hydroxyphenyl)-1-oxopropyl]amino]-4-methylpentanoic acid	(2<I>S</I>)-2-[[(2<I>S</I>)-2-[[(2<I>S</I>)-2,5-diamino-5-oxopentanoyl]amino]-3-(4-hydroxyphenyl)propanoyl]amino]-4-methylpentanoic acid	(2S)-2-[[(2S)-2-[[(2S)-2,5-diamino-5-oxopentanoyl]amino]-3-(4-hydroxyphenyl)propanoyl]amino]-4-methylpentanoic acid	(2S)-2-[[(2S)-2-[[(2S)-2,5-bis(azanyl)-5-oxidanylidene-pentanoyl]amino]-3-(4-hydroxyphenyl)propanoyl]amino]-4-methyl-pentanoic acid	(2S)-2-[[(2S)-2-[[(2S)-2,5-diamino-5-keto-pentanoyl]amino]-3-(4-hydroxyphenyl)propanoyl]amino]-4-methyl-valeric acid	InChI=1S/C20H30N4O6/c1-11(2)9-16(20(29)30)24-19(28)15(10-12-3-5-13(25)6-4-12)23-18(27)14(21)7-8-17(22)26/h3-6,11,14-16,25H,7-10,21H2,1-2H3,(H2,22,26)(H,23,27)(H,24,28)(H,29,30)/t14-,15-,16-/m0/s1	JKDBRTNMYXYLHO-JYJNAYRXSA-N		422.217	C20H30N4O6	422.500	CC(C)CC(C(=O)O)NC(=O)C(CC1=CC=C(C=C1)O)NC(=O)C(CCC(=O)N)N	CC(C)C[C@@H](C(=O)O)NC(=O)[C@H](CC1=CC=C(C=C1)O)NC(=O)[C@H](CCC(=O)N)N	185	422.217	0	30	3	0	0	0	0	1	-1	1 5 255	21 25 8 21 26 8 25 27 8 26 28 8 27 30 8 28 30 8 12 7 6 14 8 5 19 9 5	TRUE	0	C:\Users\qiang\Documents\Schrodinger\glide-dock_XP_346	glide-dock_XP_346_pv.maegz	1
145457451	1872	Structure2D_COMPOUND_CID_145457451.1	145457451	1	524	6	4	7	AAADceBzuAAAAAAAAAAAAAAAAAAAAWLAAAAAAAAAAAAAAAAAAAAAHgAQCAAACCjBgAQACAPAAgAIAAGQGAAAAAAAAAAAAIGIAAACQBIAgCAUQAAEFgCQAACcEwIAAAAAAAAAAAAAAAAAAAAAAAAAAAAAAA==	(2R)-1-[(2S)-5-amino-5-oxo-2-[[(2S)-pyrrolidine-2-carbonyl]amino]pentanoyl]pyrrolidine-2-carboxylic acid	(2R)-1-[(2S)-5-amino-1,5-dioxo-2-[[oxo-[(2S)-2-pyrrolidinyl]methyl]amino]pentyl]-2-pyrrolidinecarboxylic acid	(2<I>R</I>)-1-[(2<I>S</I>)-5-amino-5-oxo-2-[[(2<I>S</I>)-pyrrolidine-2-carbonyl]amino]pentanoyl]pyrrolidine-2-carboxylic acid	(2R)-1-[(2S)-5-amino-5-oxo-2-[[(2S)-pyrrolidine-2-carbonyl]amino]pentanoyl]pyrrolidine-2-carboxylic acid	(2R)-1-[(2S)-5-azanyl-5-oxidanylidene-2-[[(2S)-pyrrolidin-2-yl]carbonylamino]pentanoyl]pyrrolidine-2-carboxylic acid	(2R)-1-[(2S)-5-amino-5-keto-2-[[(2S)-prolyl]amino]pentanoyl]proline	InChI=1S/C15H24N4O5/c16-12(20)6-5-10(18-13(21)9-3-1-7-17-9)14(22)19-8-2-4-11(19)15(23)24/h9-11,17H,1-8H2,(H2,16,20)(H,18,21)(H,23,24)/t9-,10-,11+/m0/s1	SKICPQLTOXGWGO-GARJFASQSA-N		340.175	C15H24N4O5	340.370	C1CC(NC1)C(=O)NC(CCC(=O)N)C(=O)N2CCCC2C(=O)O	C1C[C@H](NC1)C(=O)N[C@@H](CCC(=O)N)C(=O)N2CCC[C@@H]2C(=O)O	142	340.175	0	24	3	0	0	0	0	1	-1	1 5 255	10 22 6 14 21 5 15 8 5	TRUE	0	C:\Users\qiang\Documents\Schrodinger\glide-dock_XP_346	glide-dock_XP_346_pv.maegz	1
365614	1873	PubChem_compound_text_Lauryl hydrogen sulfate_records.45	365614	1	305	6	3	16	AAADcfBzOABAAAAAAAAAAAAAAAAAAAAAAAAAAAAAAAAAAAAAAAAAHgAQCAAACADhgAYAAALAAIAAAAAAADAAAAAAAAAAAIAIAAAAQAIAgAAUAAAEEACAAAGQwKAAAAAAAAAAAAAAAAAAAAAAAAAAAAAAAA==	12-(2-aminoethylamino)dodecyl hydrogen sulfate	sulfuric acid 12-(2-aminoethylamino)dodecyl ester	12-(2-aminoethylamino)dodecyl hydrogen sulfate	12-(2-aminoethylamino)dodecyl hydrogen sulfate	12-(2-azanylethylamino)dodecyl hydrogen sulfate	sulfuric acid 12-(2-aminoethylamino)dodecyl ester	InChI=1S/C14H32N2O4S/c15-11-13-16-12-9-7-5-3-1-2-4-6-8-10-14-20-21(17,18)19/h16H,1-15H2,(H,17,18,19)	KWDLWILMACXKTF-UHFFFAOYSA-N	0.200	324.208	C14H32N2O4S	324.480	C(CCCCCCOS(=O)(=O)O)CCCCCNCCN	C(CCCCCCOS(=O)(=O)O)CCCCCNCCN		324.208	0	21	0	0	0	0	0	1	-1	1 5 255		FALSE	0	C:\Users\qiang\Documents\Schrodinger\glide-dock_XP_346	glide-dock_XP_346_pv.maegz	45
131751338	1874	Structure2D_COMPOUND_CID_131751338.1	131751338	1	513	7	4	6	AAADceB4OAAAAAAAAAAAAAAAAAAAAQAAAAAkAAAAAAAAAAAAAAAAGgAACAAADBSwgAMCCAAABgCIAqBSAAAAAAAgAAAICAEAAEgRFBYAIQAiUAAFoAAPIQPI4IwAAAAAAAAAAAAAAAAAAAAAAAAAAAAAAA==	3-methyl-2-[(E)-pent-2-enyl]-4-[3,4,5-trihydroxy-6-(hydroxymethyl)tetrahydropyran-2-yl]oxy-cyclopent-2-en-1-one	3-methyl-2-[(E)-pent-2-enyl]-4-[[3,4,5-trihydroxy-6-(hydroxymethyl)-2-oxanyl]oxy]-1-cyclopent-2-enone	3-methyl-2-[(<I>E</I>)-pent-2-enyl]-4-[3,4,5-trihydroxy-6-(hydroxymethyl)oxan-2-yl]oxycyclopent-2-en-1-one	3-methyl-2-[(E)-pent-2-enyl]-4-[3,4,5-trihydroxy-6-(hydroxymethyl)oxan-2-yl]oxycyclopent-2-en-1-one	4-[6-(hydroxymethyl)-3,4,5-tris(oxidanyl)oxan-2-yl]oxy-3-methyl-2-[(E)-pent-2-enyl]cyclopent-2-en-1-one	3-methyl-2-[(E)-pent-2-enyl]-4-(3,4,5-trihydroxy-6-methylol-tetrahydropyran-2-yl)oxy-cyclopent-2-en-1-one	InChI=1S/C17H26O7/c1-3-4-5-6-10-9(2)12(7-11(10)19)23-17-16(22)15(21)14(20)13(8-18)24-17/h4-5,12-18,20-22H,3,6-8H2,1-2H3/b5-4+	NGPYRFLYLKLRDH-SNAWJCMRSA-N	-0.500	342.168	C17H26O7	342.400	CCC=CCC1=C(C(CC1=O)OC2C(C(C(C(O2)CO)O)O)O)C	CC/C=C/CC1=C(C(CC1=O)OC2C(C(C(C(O2)CO)O)O)O)C	116	342.168	0	24	0	6	1	0	0	1	-1	1 5 255	12 16 3 11 2 3 13 2 3 8 3 3 9 4 3 10 5 3	TRUE	0	C:\Users\qiang\Documents\Schrodinger\glide-dock_XP_346	glide-dock_XP_346_pv.maegz	1
5281879	1875	PubChem_compound_text_5'-Methoxyhydnocarpin-D_records.1	5281879	1	819	10	4	5	AAADceB4PAAAAAAAAAAAAAAAAAAAAAAAAAA0YMECAAAAAACRUAAAGgAACAAADBSgmAIyBoAABgCIAqBSAAACCAAkIAAIiAEGiMgNNzaGNRqCeWOl4BULuQfI7LzOIAABCAAIQABAAAIQABCAAAAAAAAAAA==	5,7-dihydroxy-2-[(2R,3R)-2-(4-hydroxy-3-methoxy-phenyl)-3-(hydroxymethyl)-5-methoxy-2,3-dihydro-1,4-benzodioxin-7-yl]chromen-4-one	5,7-dihydroxy-2-[(2R,3R)-2-(4-hydroxy-3-methoxyphenyl)-3-(hydroxymethyl)-5-methoxy-2,3-dihydro-1,4-benzodioxin-7-yl]-1-benzopyran-4-one	5,7-dihydroxy-2-[(2<I>R</I>,3<I>R</I>)-2-(4-hydroxy-3-methoxyphenyl)-3-(hydroxymethyl)-5-methoxy-2,3-dihydro-1,4-benzodioxin-7-yl]chromen-4-one	5,7-dihydroxy-2-[(2R,3R)-2-(4-hydroxy-3-methoxyphenyl)-3-(hydroxymethyl)-5-methoxy-2,3-dihydro-1,4-benzodioxin-7-yl]chromen-4-one	2-[(2R,3R)-3-(hydroxymethyl)-5-methoxy-2-(3-methoxy-4-oxidanyl-phenyl)-2,3-dihydro-1,4-benzodioxin-7-yl]-5,7-bis(oxidanyl)chromen-4-one	5,7-dihydroxy-2-[(2R,3R)-2-(4-hydroxy-3-methoxy-phenyl)-5-methoxy-3-methylol-2,3-dihydro-1,4-benzodioxin-7-yl]chromone	InChI=1S/C26H22O10/c1-32-19-5-12(3-4-15(19)29)25-23(11-27)36-26-21(33-2)6-13(7-22(26)35-25)18-10-17(31)24-16(30)8-14(28)9-20(24)34-18/h3-10,23,25,27-30H,11H2,1-2H3/t23-,25-/m1/s1	NIOAGUZTTGFPGK-ILBGXUMGSA-N	3.200	494.121	C26H22O10	494.400	COC1=CC(=CC2=C1OC(C(O2)C3=CC(=C(C=C3)O)OC)CO)C4=CC(=O)C5=C(C=C(C=C5O4)O)O	COC1=CC(=CC2=C1O[C@@H]([C@H](O2)C3=CC(=C(C=C3)O)OC)CO)C4=CC(=O)C5=C(C=C(C=C5O4)O)O	144	494.121	0	36	2	0	0	0	0	1	-1	1 5 255	11 13 6 12 16 5 13 20 8 13 21 8 14 15 8 14 18 8 15 17 8 17 22 8 18 19 8 19 22 8 20 24 8 21 25 8 23 27 8 24 26 8 25 26 8 27 30 8 28 29 8 28 32 8 29 30 8 29 31 8 31 35 8 32 34 8 34 35 8 5 23 8 5 28 8	TRUE	0	C:\Users\qiang\Documents\Schrodinger\glide-dock_XP_346	glide-dock_XP_346_pv.maegz	1
50909833	1876	Structure2D_COMPOUND_CID_50909833.1	50909833	1	471	12	8	14	AAADceBzPAIAAAAAAAAAAAAAAAAAAAAAAAAAAAAAAAAAAAAAAAAAHgAQCCAACDzhgAYACALAAxAIQICQCIIAAAAAAAAAAIHIAAADEBYAgCAEQAAHMACBAAH6XAIAAAAAAAAAAAAAAAAAAAAAAAAAAAAAAA==	(2S)-2-amino-6-[[(3S,4R,5R)-3,4,5-trihydroxy-2-oxo-6-phosphonooxy-hexyl]amino]hexanoic acid	(2S)-2-amino-6-[[(3S,4R,5R)-3,4,5-trihydroxy-2-oxo-6-phosphonooxyhexyl]amino]hexanoic acid	(2<I>S</I>)-2-amino-6-[[(3<I>S</I>,4<I>R</I>,5<I>R</I>)-3,4,5-trihydroxy-2-oxo-6-phosphonooxyhexyl]amino]hexanoic acid	(2S)-2-amino-6-[[(3S,4R,5R)-3,4,5-trihydroxy-2-oxo-6-phosphonooxyhexyl]amino]hexanoic acid	(2S)-2-azanyl-6-[[(3S,4R,5R)-3,4,5-tris(oxidanyl)-2-oxidanylidene-6-phosphonooxy-hexyl]amino]hexanoic acid	(2S)-2-amino-6-[[(3S,4R,5R)-3,4,5-trihydroxy-2-keto-6-phosphonooxy-hexyl]amino]hexanoic acid	InChI=1S/C12H25N2O10P/c13-7(12(19)20)3-1-2-4-14-5-8(15)10(17)11(18)9(16)6-24-25(21,22)23/h7,9-11,14,16-18H,1-6,13H2,(H,19,20)(H2,21,22,23)/t7-,9+,10+,11+/m0/s1	ZICZRZZPXBCXCE-AYHFEMFVSA-N	-8.900	388.125	C12H25N2O10P	388.310	C(CCNCC(=O)C(C(C(COP(=O)(O)O)O)O)O)CC(C(=O)O)N	C(CCNCC(=O)[C@H]([C@@H]([C@@H](COP(=O)(O)O)O)O)O)C[C@@H](C(=O)O)N	220	388.125	0	25	4	0	0	0	0	1	-1	1 5 255	24 13 6 14 2 6 15 3 6 16 4 5	TRUE	0	C:\Users\qiang\Documents\Schrodinger\glide-dock_XP_346	glide-dock_XP_346_pv.maegz	1
443000	1877	Structure2D_COMPOUND_CID_443000.1	443000	1	200	5	5	0	AAADccBiOAAAAAAAAAAAAAAAAAAAAWAAAAAsAAAABgAAAAAAAAAAHgAQCAAACDzhgAYAAALAAgAAAAAAAAAAAAAAAAAAAIAIAAEDEAIAgAAEQAAHEACRAAHw8CUAAAAAAAAAAAAAAAAAAAAAAAAAAAAAAA==	(2R,3R,4S)-8-azabicyclo[3.2.1]octane-1,2,3,4-tetrol	(2R,3R,4S)-8-azabicyclo[3.2.1]octane-1,2,3,4-tetrol	(2<I>R</I>,3<I>R</I>,4<I>S</I>)-8-azabicyclo[3.2.1]octane-1,2,3,4-tetrol	(2R,3R,4S)-8-azabicyclo[3.2.1]octane-1,2,3,4-tetrol	(2R,3R,4S)-8-azabicyclo[3.2.1]octane-1,2,3,4-tetrol	(2R,3R,4S)-8-azabicyclo[3.2.1]octane-1,2,3,4-tetrol	InChI=1S/C7H13NO4/c9-4-3-1-2-7(12,8-3)6(11)5(4)10/h3-6,8-12H,1-2H2/t3?,4-,5+,6+,7?/m0/s1	FXFBVZOJVHCEDO-NMACYSKISA-N	-2.400	175.084	C7H13NO4	175.180	C1CC2(C(C(C(C1N2)O)O)O)O	C1CC2([C@@H]([C@@H]([C@H](C1N2)O)O)O)O	93	175.084	0	12	3	2	0	0	0	1	1	1 5 255	6 1 3 8 2 6 11 3 5 12 4 6 7 10 3	TRUE	0	C:\Users\qiang\Documents\Schrodinger\glide-dock_XP_346	glide-dock_XP_346_pv.maegz	1
439999	1878	Structure2D_COMPOUND_CID_439999 (1).1	439999	1	294	7	5	2	AAADccByOAAAAAAAAAAAAAAAAAAAAAAAAAAkAAAAAAAAAAAAAAAAHgAQCAAACDzxgAcCCALABgAIAAGQGAIAAAAAAAAAAIFIAAATEBYAgAQHQAAHNgCXAAH6eQcQAAAAAAAAAAAAAAAAAAAAAAAAAAAAAA==	(2S,3R,4R,5R,6R)-5-acetamido-3,4,6-trihydroxy-tetrahydropyran-2-carboxylic acid	(2S,3R,4R,5R,6R)-5-acetamido-3,4,6-trihydroxy-2-oxanecarboxylic acid	(2<I>S</I>,3<I>R</I>,4<I>R</I>,5<I>R</I>,6<I>R</I>)-5-acetamido-3,4,6-trihydroxyoxane-2-carboxylic acid	(2S,3R,4R,5R,6R)-5-acetamido-3,4,6-trihydroxyoxane-2-carboxylic acid	(2S,3R,4R,5R,6R)-5-acetamido-3,4,6-tris(oxidanyl)oxane-2-carboxylic acid	(2S,3R,4R,5R,6R)-5-acetamido-3,4,6-trihydroxy-tetrahydropyran-2-carboxylic acid	InChI=1S/C8H13NO7/c1-2(10)9-3-4(11)5(12)6(7(13)14)16-8(3)15/h3-6,8,11-12,15H,1H3,(H,9,10)(H,13,14)/t3-,4-,5-,6+,8-/m1/s1	KSOXQRPSZKLEOR-HRJVDPJDSA-N	-2.300	235.069	C8H13NO7	235.190	CC(=O)NC1C(C(C(OC1O)C(=O)O)O)O	CC(=O)N[C@@H]1[C@H]([C@H]([C@H](O[C@H]1O)C(=O)O)O)O	136	235.069	0	16	5	0	0	0	0	1	-1	1 5 255	12 14 5 10 2 5 11 3 5 13 4 5 9 8 6	TRUE	0	C:\Users\qiang\Documents\Schrodinger\glide-dock_XP_346	glide-dock_XP_346_pv.maegz	1
439999	1879	Structure2D_COMPOUND_CID_439999.1	439999	1	294	7	5	2	AAADccByOAAAAAAAAAAAAAAAAAAAAAAAAAAkAAAAAAAAAAAAAAAAHgAQCAAACDzxgAcCCALABgAIAAGQGAIAAAAAAAAAAIFIAAATEBYAgAQHQAAHNgCXAAH6eQcQAAAAAAAAAAAAAAAAAAAAAAAAAAAAAA==	(2S,3R,4R,5R,6R)-5-acetamido-3,4,6-trihydroxy-tetrahydropyran-2-carboxylic acid	(2S,3R,4R,5R,6R)-5-acetamido-3,4,6-trihydroxy-2-oxanecarboxylic acid	(2<I>S</I>,3<I>R</I>,4<I>R</I>,5<I>R</I>,6<I>R</I>)-5-acetamido-3,4,6-trihydroxyoxane-2-carboxylic acid	(2S,3R,4R,5R,6R)-5-acetamido-3,4,6-trihydroxyoxane-2-carboxylic acid	(2S,3R,4R,5R,6R)-5-acetamido-3,4,6-tris(oxidanyl)oxane-2-carboxylic acid	(2S,3R,4R,5R,6R)-5-acetamido-3,4,6-trihydroxy-tetrahydropyran-2-carboxylic acid	InChI=1S/C8H13NO7/c1-2(10)9-3-4(11)5(12)6(7(13)14)16-8(3)15/h3-6,8,11-12,15H,1H3,(H,9,10)(H,13,14)/t3-,4-,5-,6+,8-/m1/s1	KSOXQRPSZKLEOR-HRJVDPJDSA-N	-2.300	235.069	C8H13NO7	235.190	CC(=O)NC1C(C(C(OC1O)C(=O)O)O)O	CC(=O)N[C@@H]1[C@H]([C@H]([C@H](O[C@H]1O)C(=O)O)O)O	136	235.069	0	16	5	0	0	0	0	1	-1	1 5 255	12 14 5 10 2 5 11 3 5 13 4 5 9 8 6	TRUE	0	C:\Users\qiang\Documents\Schrodinger\glide-dock_XP_346	glide-dock_XP_346_pv.maegz	1
3356	1880	Structure2D_COMPOUND_CID_3356.1	3356	1	500	10	2	7	AAADceB7McAAAAAAAAAAAAAAAAAAAAAAAAA8QAAAAAAAAAABAAAAHwAQAAAADCzhmBYwBoLABACIAiFSEACCCAAkIAAIiIEODMgMZjaEtRuWOWjm9hGIqYf6yDCOAQABAAAIAAACAAIAABAAAAAAAAAAAA==	N-(2-piperidylmethyl)-2,5-bis(2,2,2-trifluoroethoxy)benzamide	N-(2-piperidinylmethyl)-2,5-bis(2,2,2-trifluoroethoxy)benzamide	<I>N</I>-(piperidin-2-ylmethyl)-2,5-bis(2,2,2-trifluoroethoxy)benzamide	N-(piperidin-2-ylmethyl)-2,5-bis(2,2,2-trifluoroethoxy)benzamide	N-(piperidin-2-ylmethyl)-2,5-bis[2,2,2-tris(fluoranyl)ethoxy]benzamide	N-(2-piperidylmethyl)-2,5-bis(2,2,2-trifluoroethoxy)benzamide	InChI=1S/C17H20F6N2O3/c18-16(19,20)9-27-12-4-5-14(28-10-17(21,22)23)13(7-12)15(26)25-8-11-3-1-2-6-24-11/h4-5,7,11,24H,1-3,6,8-10H2,(H,25,26)	DJBNUMBKLMJRSA-UHFFFAOYSA-N		414.138	C17H20F6N2O3	414.340	C1CCNC(C1)CNC(=O)C2=C(C=CC(=C2)OCC(F)(F)F)OCC(F)(F)F	C1CCNC(C1)CNC(=O)C2=C(C=CC(=C2)OCC(F)(F)F)OCC(F)(F)F		414.138	0	28	0	1	0	0	0	1	2	1 5 255	12 29 3 19 20 8 19 21 8 20 23 8 21 22 8 22 24 8 23 24 8	TRUE	0	C:\Users\qiang\Documents\Schrodinger\glide-dock_XP_346	glide-dock_XP_346_pv.maegz	1
133741	1881	Structure2D_COMPOUND_CID_133741.1	133741	1	316	3	2	7	AAADceB7MAAAAAAAAAAAAAAAAAAAAWAAAAAwAAAAAAAAAFgBAAAAHgAQCAAADAzBmAQyxoPAAgCIAiVSUACCAAAhIAAIiAEPTIgKJjLSlZOEcAhk1BHY2Aec3LDOoAABQAASEABAAAKAACQgAAAAAAAAAA==	4-[2-(dipropylamino)ethyl]-7-hydroxy-indolin-2-one	4-[2-(dipropylamino)ethyl]-7-hydroxy-1,3-dihydroindol-2-one	4-[2-(dipropylamino)ethyl]-7-hydroxy-1,3-dihydroindol-2-one	4-[2-(dipropylamino)ethyl]-7-hydroxy-1,3-dihydroindol-2-one	4-[2-(dipropylamino)ethyl]-7-oxidanyl-1,3-dihydroindol-2-one	4-[2-(dipropylamino)ethyl]-7-hydroxy-oxindole	InChI=1S/C16H24N2O2/c1-3-8-18(9-4-2)10-7-12-5-6-14(19)16-13(12)11-15(20)17-16/h5-6,19H,3-4,7-11H2,1-2H3,(H,17,20)	PVIICBUWKXYFAA-UHFFFAOYSA-N		276.184	C16H24N2O2	276.370	CCCN(CCC)CCC1=C2CC(=O)NC2=C(C=C1)O	CCCN(CCC)CCC1=C2CC(=O)NC2=C(C=C1)O		276.184	0	20	0	0	0	0	0	1	56	1 5 255	12 17 8 15 18 8 17 18 8 7 15 8 7 8 8 8 12 8	FALSE	0	C:\Users\qiang\Documents\Schrodinger\glide-dock_XP_346	glide-dock_XP_346_pv.maegz	1
85173339	1882	Structure2D_COMPOUND_CID_85173339.1	85173339	1	785	12	7	8	AAADceB4PAAAAAAAAAAAAAAAAAAAAAAAAAA0QIAAAAAAAAABAAAAGgAACAAADVSwmAMyDoAABgCIAiDSCAACAAAkIAAAiAEGiMgZNzKCNRqicQElwBUPuYfK7HzOoAABCAAAQABAAAIQAACAAAAAAAAAAA==	[3,4,5-trihydroxy-6-[[4-(1-hydroxy-1-methyl-ethyl)cyclohexene-1-carbonyl]oxymethyl]tetrahydropyran-2-yl] 3,4,5-trihydroxybenzoate	3,4,5-trihydroxybenzoic acid [3,4,5-trihydroxy-6-[[[4-(2-hydroxypropan-2-yl)-1-cyclohexenyl]-oxomethoxy]methyl]-2-oxanyl] ester	[3,4,5-trihydroxy-6-[[4-(2-hydroxypropan-2-yl)cyclohexene-1-carbonyl]oxymethyl]oxan-2-yl] 3,4,5-trihydroxybenzoate	[3,4,5-trihydroxy-6-[[4-(2-hydroxypropan-2-yl)cyclohexene-1-carbonyl]oxymethyl]oxan-2-yl] 3,4,5-trihydroxybenzoate	[3,4,5-tris(oxidanyl)-6-[[4-(2-oxidanylpropan-2-yl)cyclohexen-1-yl]carbonyloxymethyl]oxan-2-yl] 3,4,5-tris(oxidanyl)benzoate	3,4,5-trihydroxybenzoic acid [3,4,5-trihydroxy-6-[[4-(1-hydroxy-1-methyl-ethyl)cyclohexene-1-carbonyl]oxymethyl]tetrahydropyran-2-yl] ester	InChI=1S/C23H30O12/c1-23(2,32)12-5-3-10(4-6-12)20(30)33-9-15-17(27)18(28)19(29)22(34-15)35-21(31)11-7-13(24)16(26)14(25)8-11/h3,7-8,12,15,17-19,22,24-29,32H,4-6,9H2,1-2H3	GMBUWWLCKJYTTG-UHFFFAOYSA-N		498.174	C23H30O12	498.500	CC(C)(C1CCC(=CC1)C(=O)OCC2C(C(C(C(O2)OC(=O)C3=CC(=C(C(=C3)O)O)O)O)O)O)O	CC(C)(C1CCC(=CC1)C(=O)OCC2C(C(C(C(O2)OC(=O)C3=CC(=C(C(=C3)O)O)O)O)O)O)O	203	498.174	0	35	0	6	0	0	0	1	-1	1 5 255	13 14 3 18 27 3 30 31 8 30 32 8 31 34 8 32 33 8 33 35 8 34 35 8 17 4 3 20 5 3 21 6 3 23 7 3	TRUE	0	C:\Users\qiang\Documents\Schrodinger\glide-dock_XP_346	glide-dock_XP_346_pv.maegz	1
131751466	1883	Structure2D_COMPOUND_CID_131751466.1	131751466	1	435	10	6	4	AAADceBwPAAAAAAAAAAAAAAAAAAAAQAAAAAkAAAAAAAAAAAAAAAAGgAACAAACBSwgAMACAAABgCIAADQCAIAAAAgIAAACABAAEgRFAIAIAAiUAAFQAAPIQPAYAwAAAAAAAAAAAAAAAAAAAAAAAAAAAAAAA==	3,4-dihydroxy-2-[[3,4,5-trihydroxy-6-(hydroxymethyl)tetrahydropyran-2-yl]oxymethyl]-2H-furan-5-one	3,4-dihydroxy-2-[[3,4,5-trihydroxy-6-(hydroxymethyl)-2-oxanyl]oxymethyl]-2H-furan-5-one	3,4-dihydroxy-2-[[3,4,5-trihydroxy-6-(hydroxymethyl)oxan-2-yl]oxymethyl]-2<I>H</I>-furan-5-one	3,4-dihydroxy-2-[[3,4,5-trihydroxy-6-(hydroxymethyl)oxan-2-yl]oxymethyl]-2H-furan-5-one	2-[[6-(hydroxymethyl)-3,4,5-tris(oxidanyl)oxan-2-yl]oxymethyl]-3,4-bis(oxidanyl)-2H-furan-5-one	3,4-dihydroxy-2-[(3,4,5-trihydroxy-6-methylol-tetrahydropyran-2-yl)oxymethyl]-2H-furan-5-one	InChI=1S/C11H16O10/c12-1-3-5(13)7(15)9(17)11(21-3)19-2-4-6(14)8(16)10(18)20-4/h3-5,7,9,11-17H,1-2H2	VMBZDIQDNQIPAL-UHFFFAOYSA-N	-2.800	308.074	C11H16O10	308.240	C(C1C(C(C(C(O1)OCC2C(=C(C(=O)O2)O)O)O)O)O)O	C(C1C(C(C(C(O1)OCC2C(=C(C(=O)O2)O)O)O)O)O)O	166	308.074	0	21	0	6	0	0	0	1	-1	1 5 255	14 16 3 18 17 3 15 2 3 11 3 3 12 4 3 13 5 3	TRUE	0	C:\Users\qiang\Documents\Schrodinger\glide-dock_XP_346	glide-dock_XP_346_pv.maegz	1
145457466	1884	Structure2D_COMPOUND_CID_145457466.1	145457466	1	687	7	6	10	AAADceB7uAAAAAAAAAAAAAAAAAAAAWLAAAAwAAAAAAAAAFgB8AAAHgAQCAAADCjBngQ8yPLJkgCoAzX3XACCgCAxAiAI2aG4ZJgKYPLAkbGUYAhklgDYyAe83/KOgAAAAAACAAAAAAAAAAQAAAAAAAAAAA==	(4S)-5-[[(1S)-1-carboxy-2-(1H-indol-3-yl)ethyl]amino]-5-oxo-4-[[(2S)-pyrrolidine-2-carbonyl]amino]pentanoic acid	(4S)-5-[[(1S)-1-carboxy-2-(1H-indol-3-yl)ethyl]amino]-5-oxo-4-[[oxo-[(2S)-2-pyrrolidinyl]methyl]amino]pentanoic acid	(4<I>S</I>)-5-[[(1<I>S</I>)-1-carboxy-2-(1<I>H</I>-indol-3-yl)ethyl]amino]-5-oxo-4-[[(2<I>S</I>)-pyrrolidine-2-carbonyl]amino]pentanoic acid	(4S)-5-[[(1S)-1-carboxy-2-(1H-indol-3-yl)ethyl]amino]-5-oxo-4-[[(2S)-pyrrolidine-2-carbonyl]amino]pentanoic acid	(4S)-5-[[(2S)-3-(1H-indol-3-yl)-1-oxidanyl-1-oxidanylidene-propan-2-yl]amino]-5-oxidanylidene-4-[[(2S)-pyrrolidin-2-yl]carbonylamino]pentanoic acid	(4S)-5-[[(1S)-1-carboxy-2-(1H-indol-3-yl)ethyl]amino]-5-keto-4-[[(2S)-prolyl]amino]valeric acid	InChI=1S/C21H26N4O6/c26-18(27)8-7-16(24-19(28)15-6-3-9-22-15)20(29)25-17(21(30)31)10-12-11-23-14-5-2-1-4-13(12)14/h1-2,4-5,11,15-17,22-23H,3,6-10H2,(H,24,28)(H,25,29)(H,26,27)(H,30,31)/t15-,16-,17-/m0/s1	ZTVCLZLGHZXLOT-ULQDDVLXSA-N		430.185	C21H26N4O6	430.500	C1CC(NC1)C(=O)NC(CCC(=O)O)C(=O)NC(CC2=CNC3=CC=CC=C32)C(=O)O	C1C[C@H](NC1)C(=O)N[C@@H](CCC(=O)O)C(=O)N[C@@H](CC2=CNC3=CC=CC=C32)C(=O)O	161	430.185	0	31	3	0	0	0	0	1	-1	1 5 255	10 24 8 10 25 8 11 15 5 21 23 8 21 25 8 23 24 8 23 27 8 24 29 8 27 30 8 29 31 8 30 31 8 16 8 6 18 9 6	TRUE	0	C:\Users\qiang\Documents\Schrodinger\glide-dock_XP_346	glide-dock_XP_346_pv.maegz	1
439514	1885	Structure2D_COMPOUND_CID_439514.1	439514	1	510	9	4	4	AAADceB4PAAAAAAAAAAAAAAAAAAAAAAAAAA0QIAAAAAAAACBAAAAGgAACAAADBSwmAMyDoAABgCIAiDSCAACCAAgIAAIiAAGiMgdNyKEMRqieiKlwBUPqYfA4DwOIQABCAAIQABCAAIQABCAAAAAAAAAAA==	6-methoxy-7-[(2S,3R,4S,5S,6R)-3,4,5-trihydroxy-6-(hydroxymethyl)tetrahydropyran-2-yl]oxy-chromen-2-one	6-methoxy-7-[[(2S,3R,4S,5S,6R)-3,4,5-trihydroxy-6-(hydroxymethyl)-2-oxanyl]oxy]-1-benzopyran-2-one	6-methoxy-7-[(2<I>S</I>,3<I>R</I>,4<I>S</I>,5<I>S</I>,6<I>R</I>)-3,4,5-trihydroxy-6-(hydroxymethyl)oxan-2-yl]oxychromen-2-one	6-methoxy-7-[(2S,3R,4S,5S,6R)-3,4,5-trihydroxy-6-(hydroxymethyl)oxan-2-yl]oxychromen-2-one	7-[(2S,3R,4S,5S,6R)-6-(hydroxymethyl)-3,4,5-tris(oxidanyl)oxan-2-yl]oxy-6-methoxy-chromen-2-one	6-methoxy-7-[(2S,3R,4S,5S,6R)-3,4,5-trihydroxy-6-methylol-tetrahydropyran-2-yl]oxy-coumarin	InChI=1S/C16H18O9/c1-22-9-4-7-2-3-12(18)23-8(7)5-10(9)24-16-15(21)14(20)13(19)11(6-17)25-16/h2-5,11,13-17,19-21H,6H2,1H3/t11-,13-,14+,15-,16-/m1/s1	SGTCGCCQZOUMJJ-YMILTQATSA-N		354.095	C16H18O9	354.310	COC1=C(C=C2C(=C1)C=CC(=O)O2)OC3C(C(C(C(O3)CO)O)O)O	COC1=C(C=C2C(=C1)C=CC(=O)O2)O[C@H]3[C@@H]([C@H]([C@@H]([C@H](O3)CO)O)O)O	135	354.095	0	25	5	0	0	0	0	1	1	1 5 255	13 15 5 16 17 8 16 18 8 17 21 8 18 19 8 19 20 8 14 2 5 20 21 8 20 22 8 22 23 8 23 24 8 10 3 5 11 4 6 12 5 6 8 19 8 8 24 8	TRUE	0	C:\Users\qiang\Documents\Schrodinger\glide-dock_XP_346	glide-dock_XP_346_pv.maegz	1
4364	1886	Structure2D_COMPOUND_CID_4364.1	4364	1	567	6	4	13	AAADceB7OABAAAAAAAAAAAAAAAAAAAAAAAAwAAAAAAAAAAABAAAAHgQQCAAADSjF2AayCILAAgiIAiHSmAACAAAgABAIiIGIAIgKYDKgkTGUYAAklgCYiAeYyKCOAAAAAAAAAAAAAAAAAAAAAAAAAAAAAA==	2-[[2-[(2-formamido-4-methylsulfanyl-butanoyl)amino]-4-methyl-pentanoyl]amino]-3-phenyl-propanoic acid	2-[[2-[[2-formamido-4-(methylthio)-1-oxobutyl]amino]-4-methyl-1-oxopentyl]amino]-3-phenylpropanoic acid	2-[[2-[(2-formamido-4-methylsulfanylbutanoyl)amino]-4-methylpentanoyl]amino]-3-phenylpropanoic acid	2-[[2-[(2-formamido-4-methylsulfanylbutanoyl)amino]-4-methylpentanoyl]amino]-3-phenylpropanoic acid	2-[[2-[(2-formamido-4-methylsulfanyl-butanoyl)amino]-4-methyl-pentanoyl]amino]-3-phenyl-propanoic acid	2-[[2-[[2-formamido-4-(methylthio)butanoyl]amino]-4-methyl-pentanoyl]amino]-3-phenyl-propionic acid	InChI=1S/C21H31N3O5S/c1-14(2)11-17(23-19(26)16(22-13-25)9-10-30-3)20(27)24-18(21(28)29)12-15-7-5-4-6-8-15/h4-8,13-14,16-18H,9-12H2,1-3H3,(H,22,25)(H,23,26)(H,24,27)(H,28,29)	PRQROPMIIGLWRP-UHFFFAOYSA-N		437.198	C21H31N3O5S	437.600	CC(C)CC(C(=O)NC(CC1=CC=CC=C1)C(=O)O)NC(=O)C(CCSC)NC=O	CC(C)CC(C(=O)NC(CC1=CC=CC=C1)C(=O)O)NC(=O)C(CCSC)NC=O	150	437.198	0	30	0	3	0	0	0	1	-1	1 5 255	10 11 3 16 19 3 17 20 3 22 24 8 22 25 8 24 27 8 25 28 8 27 29 8 28 29 8	TRUE	0	C:\Users\qiang\Documents\Schrodinger\glide-dock_XP_346	glide-dock_XP_346_pv.maegz	1
103617654	1887	PubChem_substance_text_Polyporusterone B_records.14																								0									1 3	1 27 5 13 31 5 14 34 6 17 32 6 19 35 6 2 28 5 22 26 6 5 29 5 6 30 5 9 33 6	TRUE	0	C:\Users\qiang\Documents\Schrodinger\glide-dock_XP_346	glide-dock_XP_346_pv.maegz	14	0	103617654	8	ChEMBL	CHEMBL479518	Polyporusterone D CHEMBL479518	CHEMBL479518	https://www.ebi.ac.uk/chembl/
71070	1888	Structure2D_COMPOUND_CID_71070.1	71070	1	176	4	4	5	AAADccBjsAAAAAAAAAAAAAAAAAAAAAAAAAAAAAAAAAAAAAAAAAAAHgAQCAAACCjBgAQBCAJAAgAoAACQLAAAAAEAAAAAAIGAAAACABIAgAAAQAAEEAAAAACYEQAAAAAAAAAAAAAAAAAAAAAAAAAAAAAAAA==	(2R)-2-amino-5-guanidino-pentanoic acid	(2R)-2-amino-5-(diaminomethylideneamino)pentanoic acid	(2<I>R</I>)-2-amino-5-(diaminomethylideneamino)pentanoic acid	(2R)-2-amino-5-(diaminomethylideneamino)pentanoic acid	(2R)-2-azanyl-5-[bis(azanyl)methylideneamino]pentanoic acid	(2R)-2-amino-5-guanidino-valeric acid	InChI=1S/C6H14N4O2/c7-4(5(11)12)2-1-3-10-6(8)9/h4H,1-3,7H2,(H,11,12)(H4,8,9,10)/t4-/m1/s1	ODKSFYDXXFIFQN-SCSAIBSYSA-N		174.112	C6H14N4O2	174.200	C(CC(C(=O)O)N)CN=C(N)N	C(C[C@H](C(=O)O)N)CN=C(N)N	128	174.112	0	12	1	0	0	0	0	1	-1	1 5 255	9 3 5	TRUE	0	C:\Users\qiang\Documents\Schrodinger\glide-dock_XP_346	glide-dock_XP_346_pv.maegz	1
188661	1889	Structure2D_COMPOUND_CID_188661.1	188661	1	765	6	3	5	AAADceB4OAAEAAAAAAAAAAAAAABgAYAAAAAwQAAAAAAQAEABAAAAGgIACAAADxagmCIyDoAABgCIAiDSCAACCAAkJEAAiAEGC8gMNzeHNhqCcWAl4BUIuQeI7PzPoCABKAAZCABAQAJQADIQAQAACAAAAA==	[(2R,4S,4aR,7aS,7bR)-4-hydroxy-3-(hydroxymethyl)-6,6,7b-trimethyl-2,4,4a,5,7,7a-hexahydro-1H-cyclobuta[e]inden-2-yl] 3-chloro-6-hydroxy-4-methoxy-2-methyl-benzoate	3-chloro-6-hydroxy-4-methoxy-2-methylbenzoic acid [(2R,4S,4aR,7aS,7bR)-4-hydroxy-3-(hydroxymethyl)-6,6,7b-trimethyl-2,4,4a,5,7,7a-hexahydro-1H-cyclobuta[e]inden-2-yl] ester	[(2<I>R</I>,4<I>S</I>,4<I>a</I><I>R</I>,7<I>a</I><I>S</I>,7<I>b</I><I>R</I>)-4-hydroxy-3-(hydroxymethyl)-6,6,7<I>b</I>-trimethyl-2,4,4<I>a</I>,5,7,7<I>a</I>-hexahydro-1<I>H</I>-cyclobuta[e]inden-2-yl] 3-chloro-6-hydroxy-4-methoxy-2-methylbenzoate	[(2R,4S,4aR,7aS,7bR)-4-hydroxy-3-(hydroxymethyl)-6,6,7b-trimethyl-2,4,4a,5,7,7a-hexahydro-1H-cyclobuta[e]inden-2-yl] 3-chloro-6-hydroxy-4-methoxy-2-methylbenzoate	[(2R,4S,4aR,7aS,7bR)-3-(hydroxymethyl)-6,6,7b-trimethyl-4-oxidanyl-2,4,4a,5,7,7a-hexahydro-1H-cyclobuta[e]inden-2-yl] 3-chloranyl-4-methoxy-2-methyl-6-oxidanyl-benzoate	3-chloro-6-hydroxy-4-methoxy-2-methyl-benzoic acid [(2R,4S,4aR,7aS,7bR)-4-hydroxy-6,6,7b-trimethyl-3-methylol-2,4,4a,5,7,7a-hexahydro-1H-cyclobut[e]inden-2-yl] ester	InChI=1S/C24H31ClO6/c1-11-18(15(27)6-16(30-5)20(11)25)22(29)31-17-9-24(4)14-8-23(2,3)7-12(14)21(28)13(10-26)19(17)24/h6,12,14,17,21,26-28H,7-10H2,1-5H3/t12-,14+,17-,21+,24-/m1/s1	OMAGQTXDHXASNM-RNNQDMPLSA-N	4.400	450.181	C24H31ClO6	450.900	CC1=C(C(=CC(=C1Cl)OC)O)C(=O)OC2CC3(C2=C(C(C4C3CC(C4)(C)C)O)CO)C	CC1=C(C(=CC(=C1Cl)OC)O)C(=O)O[C@@H]2C[C@]3(C2=C([C@H]([C@H]4[C@@H]3CC(C4)(C)C)O)CO)C		450.181	0	31	5	0	0	0	0	1	9	1 5 255	10 33 6 16 2 6 24 25 8 24 26 8 25 27 8 26 28 8 27 30 8 28 30 8 17 3 6 8 32 6 9 19 5	TRUE	0	C:\Users\qiang\Documents\Schrodinger\glide-dock_XP_346	glide-dock_XP_346_pv.maegz	1
6834	1890	Structure2D_COMPOUND_CID_6834.1	6834	1	249	2	0	5	AAADceB7AAAAEAAAAAAAAAAAAAAAAAAAAAA8QAAAAAAAAAABwAAAHABAAAABrQjBHgQ+gJMIEACgAzRnRACCgCAxAiQI2CA4ZLgIIOLAkZGEIAhggADIyhcQgMAOggAAAAAAAAAEAAAAAAAAAAAAAAAAAA==	3-(4-bromophenyl)-N,N-dimethyl-3-(2-pyridyl)propan-1-amine	3-(4-bromophenyl)-N,N-dimethyl-3-(2-pyridinyl)-1-propanamine	3-(4-bromophenyl)-<I>N</I>,<I>N</I>-dimethyl-3-pyridin-2-ylpropan-1-amine	3-(4-bromophenyl)-N,N-dimethyl-3-pyridin-2-ylpropan-1-amine	3-(4-bromophenyl)-N,N-dimethyl-3-pyridin-2-yl-propan-1-amine	[3-(4-bromophenyl)-3-(2-pyridyl)propyl]-dimethyl-amine	InChI=1S/C16H19BrN2/c1-19(2)12-10-15(16-5-3-4-11-18-16)13-6-8-14(17)9-7-13/h3-9,11,15H,10,12H2,1-2H3	ZDIGNSYAACHWNL-UHFFFAOYSA-N		318.073	C16H19BrN2	319.240	CN(C)CCC(C1=CC=C(C=C1)Br)C2=CC=CC=N2	CN(C)CCC(C1=CC=C(C=C1)Br)C2=CC=CC=N2		318.073	0	19	0	1	0	0	0	1	-1	1 5 255	10 15 8 11 16 8 14 17 8 15 17 8 16 19 8 18 19 8 3 18 8 3 8 8 4 5 3 7 10 8 7 9 8 8 11 8 9 14 8	TRUE	0	C:\Users\qiang\Documents\Schrodinger\glide-dock_XP_346	glide-dock_XP_346_pv.maegz	1
53997579	1891	Structure2D_COMPOUND_CID_53997579.1	53997579	1	595	5	5	9	AAADceB7uAAAAAAAAAAAAAAAAAAAAWAAAAAwAAAAAAAAAFgB8AAAHgAQCAAADSjBngQ+yPLJkgCoAzX3XACCgCAxAiAI2aG4ZJgKYPLAkbGUYAhklgDYyAcYicCOgAAAAAACAAAAAAAAAAQAAAAAAAAAAA==	(2S)-2-[[(2S)-2-[[(2S)-2-amino-3-methyl-butanoyl]amino]-3-(1H-indol-3-yl)propanoyl]amino]-3-methyl-butanoic acid	(2S)-2-[[(2S)-2-[[(2S)-2-amino-3-methyl-1-oxobutyl]amino]-3-(1H-indol-3-yl)-1-oxopropyl]amino]-3-methylbutanoic acid	(2<I>S</I>)-2-[[(2<I>S</I>)-2-[[(2<I>S</I>)-2-amino-3-methylbutanoyl]amino]-3-(1<I>H</I>-indol-3-yl)propanoyl]amino]-3-methylbutanoic acid	(2S)-2-[[(2S)-2-[[(2S)-2-amino-3-methylbutanoyl]amino]-3-(1H-indol-3-yl)propanoyl]amino]-3-methylbutanoic acid	(2S)-2-[[(2S)-2-[[(2S)-2-azanyl-3-methyl-butanoyl]amino]-3-(1H-indol-3-yl)propanoyl]amino]-3-methyl-butanoic acid	(2S)-2-[[(2S)-2-[[(2S)-2-amino-3-methyl-butanoyl]amino]-3-(1H-indol-3-yl)propanoyl]amino]-3-methyl-butyric acid	InChI=1S/C21H30N4O4/c1-11(2)17(22)20(27)24-16(19(26)25-18(12(3)4)21(28)29)9-13-10-23-15-8-6-5-7-14(13)15/h5-8,10-12,16-18,23H,9,22H2,1-4H3,(H,24,27)(H,25,26)(H,28,29)/t16-,17-,18-/m0/s1	KJFBXCFOPAKPTM-BZSNNMDCSA-N		402.227	C21H30N4O4	402.500	CC(C)C(C(=O)NC(CC1=CNC2=CC=CC=C21)C(=O)NC(C(C)C)C(=O)O)N	CC(C)[C@@H](C(=O)N[C@@H](CC1=CNC2=CC=CC=C21)C(=O)N[C@@H](C(C)C)C(=O)O)N	137	402.227	0	29	3	0	0	0	0	1	-1	1 5 255	12 18 8 12 20 8 18 19 8 18 26 8 19 27 8 26 28 8 27 29 8 28 29 8 9 5 5 11 6 6 7 19 8 7 20 8 14 8 5	TRUE	0	C:\Users\qiang\Documents\Schrodinger\glide-dock_XP_346	glide-dock_XP_346_pv.maegz	1
90479478	1892	PubChem_compound_text_Lauryl hydrogen sulfate_records.31	90479478	1	993	12	2	23	AAADcfB/vABgAAAAAAAAAAAAAAAAAAAAAAA8YIAAAAAAAAAB0AAAHgQQCAAADAjh2wY/uJdIFIioAjb3/DCCgCk1ALAJ2CE4TNiILrLgfViGNQgsxgPoqaeIyKCOAAAAAAAAAAAAAAAAAAAAAAAAAAAAAA==	[(Z)-4-[(4-amino-2-methyl-pyrimidin-5-yl)methyl-formyl-amino]-3-benzoylsulfanyl-pent-3-enyl] benzoate;dodecyl hydrogen sulfate	benzoic acid [(Z)-4-[(4-amino-2-methyl-5-pyrimidinyl)methyl-formylamino]-3-(benzoylthio)pent-3-enyl] ester;sulfuric acid dodecyl ester	[(<I>Z</I>)-4-[(4-amino-2-methylpyrimidin-5-yl)methyl-formylamino]-3-benzoylsulfanylpent-3-enyl] benzoate;dodecyl hydrogen sulfate	[(Z)-4-[(4-amino-2-methylpyrimidin-5-yl)methyl-formylamino]-3-benzoylsulfanylpent-3-enyl] benzoate;dodecyl hydrogen sulfate	[(Z)-4-[(4-azanyl-2-methyl-pyrimidin-5-yl)methyl-methanoyl-amino]-3-(phenylcarbonylsulfanyl)pent-3-enyl] benzoate;dodecyl hydrogen sulfate	benzoic acid [(Z)-4-[(4-amino-2-methyl-pyrimidin-5-yl)methyl-formyl-amino]-3-(benzoylthio)pent-3-enyl] ester;sulfuric acid lauryl ester	InChI=1S/C26H26N4O4S.C12H26O4S/c1-18(30(17-31)16-22-15-28-19(2)29-24(22)27)23(35-26(33)21-11-7-4-8-12-21)13-14-34-25(32)20-9-5-3-6-10-20;1-2-3-4-5-6-7-8-9-10-11-12-16-17(13,14)15/h3-12,15,17H,13-14,16H2,1-2H3,(H2,27,28,29);2-12H2,1H3,(H,13,14,15)/b23-18-;	OLTVHXMQBFXARO-XTMYEIJHSA-N		756.323	C38H52N4O8S2	757.000	CCCCCCCCCCCCOS(=O)(=O)O.CC1=NC=C(C(=N1)N)CN(C=O)C(=C(CCOC(=O)C2=CC=CC=C2)SC(=O)C3=CC=CC=C3)C	CCCCCCCCCCCCOS(=O)(=O)O.CC1=NC=C(C(=N1)N)CN(C=O)/C(=C(/CCOC(=O)C2=CC=CC=C2)\SC(=O)C3=CC=CC=C3)/C		756.323	0	52	0	0	1	0	0	2	3	1 5 255	12 34 8 12 37 8 13 36 8 13 37 8 31 34 8 31 36 8 39 43 8 39 44 8 42 45 8 42 46 8 43 47 8 44 48 8 45 50 8 46 51 8 47 49 8 48 49 8 50 52 8 51 52 8	FALSE	0	C:\Users\qiang\Documents\Schrodinger\glide-dock_XP_346	glide-dock_XP_346_pv.maegz	31
85375228	1893	PubChem_substance_text_Polyporusterone B_records.11																								0									1 3	8 1 6 10 36 6 11 23 5 17 37 5 18 2 5 25 3 5 30 32 6 26 4 6 27 6 5 7 19 5 9 35 6	TRUE	0	C:\Users\qiang\Documents\Schrodinger\glide-dock_XP_346	glide-dock_XP_346_pv.maegz	11	0	85375228	3	ChEBI	CHEBI:176164	Polyporusterone A (2S,3R,5R,9R,10R,13R,14S,17S)-17-[(2R,3R,5S)-2,3-dihydroxy-5,6-dimethylheptan-2-yl]-2,3,14-trihydroxy-10,13-dimethyl-2,3,4,5,9,11,12,15,16,17-decahydro-1H-cyclopenta[a]phenanthren-6-one CHEBI:176164	CHEBI:176164	http://www.ebi.ac.uk/chebi/
73419	1894	Structure2D_COMPOUND_CID_73419.1	73419	1	730	4	3	0	AAADcfB7MAAAAAAAAAAAAAAAAAAAAYAAAAA8aMECAAAAAGjwAAAAHgAQCAAADzzhgAYCCALABgAAAAAAAAAAAAAAAAAAAIAIAAASAAIAgAAHQAAEEACUAAGw4PQPgAAAAAAAAACQAASAACAAAYAADAAAAA==	(1S,2R,5S,7S,10S,11S,14S,15R,16S,17R,20R,22S,24R)-7-amino-10,14,16,20-tetramethyl-23-oxa-18-azahexacyclo[12.11.0.02,11.05,10.015,24.017,22]pentacosan-22-ol	(1S,2R,5S,7S,10S,11S,14S,15R,16S,17R,20R,22S,24R)-7-amino-10,14,16,20-tetramethyl-23-oxa-18-azahexacyclo[12.11.0.02,11.05,10.015,24.017,22]pentacosan-22-ol	(1<I>S</I>,2<I>R</I>,5<I>S</I>,7<I>S</I>,10<I>S</I>,11<I>S</I>,14<I>S</I>,15<I>R</I>,16<I>S</I>,17<I>R</I>,20<I>R</I>,22<I>S</I>,24<I>R</I>)-7-amino-10,14,16,20-tetramethyl-23-oxa-18-azahexacyclo[12.11.0.0<SUP>2,11</SUP>.0<SUP>5,10</SUP>.0<SUP>15,24</SUP>.0<SUP>17,22</SUP>]pentacosan-22-ol	(1S,2R,5S,7S,10S,11S,14S,15R,16S,17R,20R,22S,24R)-7-amino-10,14,16,20-tetramethyl-23-oxa-18-azahexacyclo[12.11.0.02,11.05,10.015,24.017,22]pentacosan-22-ol	(1S,2R,5S,7S,10S,11S,14S,15R,16S,17R,20R,22S,24R)-7-azanyl-10,14,16,20-tetramethyl-23-oxa-18-azahexacyclo[12.11.0.02,11.05,10.015,24.017,22]pentacosan-22-ol	(1S,2R,5S,7S,10S,11S,14S,15R,16S,17R,20R,22S,24R)-7-amino-10,14,16,20-tetramethyl-23-oxa-18-azahexacyclo[12.11.0.02,11.05,10.015,24.017,22]pentacosan-22-ol	InChI=1S/C27H46N2O2/c1-15-13-27(30)24(29-14-15)16(2)23-22(31-27)12-21-19-6-5-17-11-18(28)7-9-25(17,3)20(19)8-10-26(21,23)4/h15-24,29-30H,5-14,28H2,1-4H3/t15-,16+,17+,18+,19-,20+,21+,22-,23+,24-,25+,26+,27+/m1/s1	ZPTJKUUQUDRHTL-QAQRTNARSA-N		430.356	C27H46N2O2	430.700	CC1CC2(C(C(C3C(O2)CC4C3(CCC5C4CCC6C5(CCC(C6)N)C)C)C)NC1)O	C[C@@H]1C[C@]2([C@@H]([C@H]([C@H]3[C@H](O2)C[C@@H]4[C@@]3(CC[C@H]5[C@H]4CC[C@@H]6[C@@]5(CC[C@@H](C6)N)C)C)C)NC1)O		430.356	0	31	13	0	0	0	0	1	1	1 5 255	10 24 6 11 36 6 15 43 5 16 27 5 22 2 6 20 52 5 29 31 5 26 4 6 5 19 6 6 32 5 7 33 6 8 34 5 9 35 5	TRUE	0	C:\Users\qiang\Documents\Schrodinger\glide-dock_XP_346	glide-dock_XP_346_pv.maegz	1
14825849	1895	PubChem_compound_text_Hypolaetin 8,3'-dimethyl ether_records.1	14825849	1	505	7	3	3	AAADccB4OAAAAAAAAAAAAAAAAAAAAAAAAAAwYIAAAAAAAACBQAAAGgAACAAADASAmAIyBoAABgCIAqBSAAACCAAkIAAIiAEGiMgNJzaGNRqCeWOl4BULuQfK7LzOIQABCAAIQABCAAIQABCAAAAAAAAAAA==	5,7-dihydroxy-2-(4-hydroxy-3-methoxy-phenyl)-8-methoxy-chromen-4-one	5,7-dihydroxy-2-(4-hydroxy-3-methoxyphenyl)-8-methoxy-1-benzopyran-4-one	5,7-dihydroxy-2-(4-hydroxy-3-methoxyphenyl)-8-methoxychromen-4-one	5,7-dihydroxy-2-(4-hydroxy-3-methoxyphenyl)-8-methoxychromen-4-one	8-methoxy-2-(3-methoxy-4-oxidanyl-phenyl)-5,7-bis(oxidanyl)chromen-4-one	5,7-dihydroxy-2-(4-hydroxy-3-methoxy-phenyl)-8-methoxy-chromone	InChI=1S/C17H14O7/c1-22-14-5-8(3-4-9(14)18)13-7-11(20)15-10(19)6-12(21)16(23-2)17(15)24-13/h3-7,18-19,21H,1-2H3	XHBFGFPZSKMOQP-UHFFFAOYSA-N	2.600	330.074	C17H14O7	330.290	COC1=C(C=CC(=C1)C2=CC(=O)C3=C(O2)C(=C(C=C3O)O)OC)O	COC1=C(C=CC(=C1)C2=CC(=O)C3=C(O2)C(=C(C=C3O)O)OC)O	105	330.074	0	24	0	0	0	0	0	1	-1	1 5 255	1 10 8 1 9 8 10 15 8 11 18 8 11 19 8 12 16 8 13 15 8 14 17 8 16 17 8 18 20 8 19 21 8 20 22 8 21 22 8 8 13 8 8 14 8 8 9 8 9 12 8	FALSE	0	C:\Users\qiang\Documents\Schrodinger\glide-dock_XP_346	glide-dock_XP_346_pv.maegz	1
53491908	1896	Structure2D_COMPOUND_CID_53491908.1	53491908	1	472	6	4	10	AAADcfB7uAAAAAAAAAAAAAAAAAAAAWAAAAAAAAAAAAAAAAAAAAAAHgAQCAAADSjBgAQCCAPAAgAIAAGQGAAAAAAAAAAAAIGIAAACQBIAgCAUQAAEFgCQAAGYSQAKAAAAAAAAAAAAAAAAAAAAAAAAAAAAAA==	(2S)-6-amino-2-[[(2S)-1-[(2S,3S)-2-amino-3-methyl-pentanoyl]pyrrolidine-2-carbonyl]amino]hexanoic acid	(2S)-6-amino-2-[[[(2S)-1-[(2S,3S)-2-amino-3-methyl-1-oxopentyl]-2-pyrrolidinyl]-oxomethyl]amino]hexanoic acid	(2<I>S</I>)-6-amino-2-[[(2<I>S</I>)-1-[(2<I>S</I>,3<I>S</I>)-2-amino-3-methylpentanoyl]pyrrolidine-2-carbonyl]amino]hexanoic acid	(2S)-6-amino-2-[[(2S)-1-[(2S,3S)-2-amino-3-methylpentanoyl]pyrrolidine-2-carbonyl]amino]hexanoic acid	(2S)-6-azanyl-2-[[(2S)-1-[(2S,3S)-2-azanyl-3-methyl-pentanoyl]pyrrolidin-2-yl]carbonylamino]hexanoic acid	(2S)-6-amino-2-[[(2S)-1-[(2S,3S)-2-amino-3-methyl-pentanoyl]prolyl]amino]hexanoic acid	InChI=1S/C17H32N4O4/c1-3-11(2)14(19)16(23)21-10-6-8-13(21)15(22)20-12(17(24)25)7-4-5-9-18/h11-14H,3-10,18-19H2,1-2H3,(H,20,22)(H,24,25)/t11-,12-,13-,14-/m0/s1	NLZVTPYXYXMCIP-XUXIUFHCSA-N		356.242	C17H32N4O4	356.500	CCC(C)C(C(=O)N1CCCC1C(=O)NC(CCCCN)C(=O)O)N	CC[C@H](C)[C@@H](C(=O)N1CCC[C@H]1C(=O)N[C@@H](CCCCN)C(=O)O)N	139	356.242	0	25	4	0	0	0	0	1	-1	1 5 255	15 19 5 18 6 6 14 7 6 9 16 5	TRUE	0	C:\Users\qiang\Documents\Schrodinger\glide-dock_XP_346	glide-dock_XP_346_pv.maegz	1
463933453	1897	PubChem_substance_text_Polyporusterone B_records.23																								0											TRUE	0	C:\Users\qiang\Documents\Schrodinger\glide-dock_XP_346	glide-dock_XP_346_pv.maegz	23	0	463933453	1	12043	TN6909	141360-89-6 Polyporusterone B	TN6909	https://www.targetmol.com/contact-us
33478	1898	Structure2D_COMPOUND_CID_33478.1	33478	1	774	8	2	9	AAADceB7OABAAAAAAAAAAAAAAABYAWAAAAAwAAAABYAAAAABAAAAHgQQAAAADijF2AeyCIPABAiIAiHSGACCAABgABAIiIGIBIgaYDqglTG1IABklgC8iAcYiICOAAAAAAAAAAAAAAAAAAAAAAAAAAAAAA==	2,2-dimethylpropanoyloxymethyl (2S,5R,6R)-6-[[(2R)-2-amino-2-phenyl-acetyl]amino]-3,3-dimethyl-7-oxo-4-thia-1-azabicyclo[3.2.0]heptane-2-carboxylate	(2S,5R,6R)-6-[[(2R)-2-amino-1-oxo-2-phenylethyl]amino]-3,3-dimethyl-7-oxo-4-thia-1-azabicyclo[3.2.0]heptane-2-carboxylic acid (2,2-dimethyl-1-oxopropoxy)methyl ester	2,2-dimethylpropanoyloxymethyl (2<I>S</I>,5<I>R</I>,6<I>R</I>)-6-[[(2<I>R</I>)-2-amino-2-phenylacetyl]amino]-3,3-dimethyl-7-oxo-4-thia-1-azabicyclo[3.2.0]heptane-2-carboxylate	2,2-dimethylpropanoyloxymethyl (2S,5R,6R)-6-[[(2R)-2-amino-2-phenylacetyl]amino]-3,3-dimethyl-7-oxo-4-thia-1-azabicyclo[3.2.0]heptane-2-carboxylate	2,2-dimethylpropanoyloxymethyl (2S,5R,6R)-6-[[(2R)-2-azanyl-2-phenyl-ethanoyl]amino]-3,3-dimethyl-7-oxidanylidene-4-thia-1-azabicyclo[3.2.0]heptane-2-carboxylate	(2S,5R,6R)-6-[[(2R)-2-amino-2-phenyl-acetyl]amino]-7-keto-3,3-dimethyl-4-thia-1-azabicyclo[3.2.0]heptane-2-carboxylic acid pivaloyloxymethyl ester	InChI=1S/C22H29N3O6S/c1-21(2,3)20(29)31-11-30-19(28)15-22(4,5)32-18-14(17(27)25(15)18)24-16(26)13(23)12-9-7-6-8-10-12/h6-10,13-15,18H,11,23H2,1-5H3,(H,24,26)/t13-,14-,15+,18-/m1/s1	ZEMIJUDPLILVNQ-ZXFNITATSA-N		463.178	C22H29N3O6S	463.500	CC1(C(N2C(S1)C(C2=O)NC(=O)C(C3=CC=CC=C3)N)C(=O)OCOC(=O)C(C)(C)C)C	CC1([C@@H](N2[C@H](S1)[C@@H](C2=O)NC(=O)[C@@H](C3=CC=CC=C3)N)C(=O)OCOC(=O)C(C)(C)C)C	153	463.178	0	32	4	0	0	0	0	1	4	1 5 255	20 10 5 11 33 6 13 18 6 22 24 8 22 25 8 24 30 8 25 31 8 30 32 8 31 32 8 14 9 5	TRUE	0	C:\Users\qiang\Documents\Schrodinger\glide-dock_XP_346	glide-dock_XP_346_pv.maegz	1
145458422	1899	Structure2D_COMPOUND_CID_145458422.1	145458422	1	610	5	5	10	AAADcfB7uAAAAAAAAAAAAAAAAAAAAWAAAAAwAAAAAAAAAFgB8AAAHgAQCAAADSjBngQ+yPLJkgCoAzX3XACCgCAxAiAI2aG4ZJgKYPLAkbGUYAhklgDYyAcYicCOgAAAAAACAAAAAAAAAAQAAAAAAAAAAA==	(2S)-2-[[(2S)-2-[[(2S)-2-amino-3-(1H-indol-3-yl)propanoyl]amino]-4-methyl-pentanoyl]amino]-3-methyl-butanoic acid	(2S)-2-[[(2S)-2-[[(2S)-2-amino-3-(1H-indol-3-yl)-1-oxopropyl]amino]-4-methyl-1-oxopentyl]amino]-3-methylbutanoic acid	(2<I>S</I>)-2-[[(2<I>S</I>)-2-[[(2<I>S</I>)-2-amino-3-(1<I>H</I>-indol-3-yl)propanoyl]amino]-4-methylpentanoyl]amino]-3-methylbutanoic acid	(2S)-2-[[(2S)-2-[[(2S)-2-amino-3-(1H-indol-3-yl)propanoyl]amino]-4-methylpentanoyl]amino]-3-methylbutanoic acid	(2S)-2-[[(2S)-2-[[(2S)-2-azanyl-3-(1H-indol-3-yl)propanoyl]amino]-4-methyl-pentanoyl]amino]-3-methyl-butanoic acid	(2S)-2-[[(2S)-2-[[(2S)-2-amino-3-(1H-indol-3-yl)propanoyl]amino]-4-methyl-pentanoyl]amino]-3-methyl-butyric acid	InChI=1S/C22H32N4O4/c1-12(2)9-18(21(28)26-19(13(3)4)22(29)30)25-20(27)16(23)10-14-11-24-17-8-6-5-7-15(14)17/h5-8,11-13,16,18-19,24H,9-10,23H2,1-4H3,(H,25,27)(H,26,28)(H,29,30)/t16-,18-,19-/m0/s1	WMBFONUKQXGLMU-WDSOQIARSA-N		416.242	C22H32N4O4	416.500	CC(C)CC(C(=O)NC(C(C)C)C(=O)O)NC(=O)C(CC1=CNC2=CC=CC=C21)N	CC(C)C[C@@H](C(=O)N[C@@H](C(C)C)C(=O)O)NC(=O)[C@H](CC1=CNC2=CC=CC=C21)N	137	416.242	0	30	3	0	0	0	0	1	-1	1 5 255	20 23 8 20 26 8 23 25 8 23 27 8 25 28 8 27 29 8 28 30 8 29 30 8 9 5 5 12 6 5 15 7 5 8 25 8 8 26 8	TRUE	0	C:\Users\qiang\Documents\Schrodinger\glide-dock_XP_346	glide-dock_XP_346_pv.maegz	1
441970	1900	Structure2D_COMPOUND_CID_441970.1	441970	1	469	5	1	2	AAADceB4OAAAAAAAAAAAAAAAAAAAASAAAAAwQAAAAAAAAEiBAAAAGgAACAAADFSgmAIyBoAABgCIAqBSAAACCAAkIAAAiAEGCMgNJzaENRqCeWCl4BULqQfI7PzOIAACCAAIAABAAAQQABAAAAAAAAAAAA==	(2S)-2-(1-hydroxy-1-methyl-ethyl)-4-methoxy-7-methyl-2,3-dihydrofuro[3,2-g]chromen-5-one	(2S)-2-(2-hydroxypropan-2-yl)-4-methoxy-7-methyl-2,3-dihydrofuro[3,2-g][1]benzopyran-5-one	(2<I>S</I>)-2-(2-hydroxypropan-2-yl)-4-methoxy-7-methyl-2,3-dihydrofuro[3,2-g]chromen-5-one	(2S)-2-(2-hydroxypropan-2-yl)-4-methoxy-7-methyl-2,3-dihydrofuro[3,2-g]chromen-5-one	(2S)-4-methoxy-7-methyl-2-(2-oxidanylpropan-2-yl)-2,3-dihydrofuro[3,2-g]chromen-5-one	(2S)-2-(1-hydroxy-1-methyl-ethyl)-4-methoxy-7-methyl-2,3-dihydrofuro[3,2-g]chromen-5-one	InChI=1S/C16H18O5/c1-8-5-10(17)14-12(20-8)7-11-9(15(14)19-4)6-13(21-11)16(2,3)18/h5,7,13,18H,6H2,1-4H3/t13-/m0/s1	DGFLRNOCLJGHLY-ZDUSSCGKSA-N	1.900	290.115	C16H18O5	290.310	CC1=CC(=O)C2=C(C3=C(C=C2O1)OC(C3)C(C)(C)O)OC	CC1=CC(=O)C2=C(C3=C(C=C2O1)O[C@@H](C3)C(C)(C)O)OC	65	290.115	0	21	1	0	0	0	0	1	3	1 5 255	10 14 8 13 15 8 14 16 8 15 16 8 15 17 8 17 19 8 18 19 8 4 16 8 4 18 8 6 22 6 9 10 8 9 13 8	TRUE	0	C:\Users\qiang\Documents\Schrodinger\glide-dock_XP_346	glide-dock_XP_346_pv.maegz	1
4086	1901	Structure2D_COMPOUND_CID_4086.1	4086	1	177	4	4	4	AAADceByMAAAAAAAAAAAAAAAAAAAAAAAAAAwAAAAAAAAAAABAAAAHgAQCAAADDzhmAYyBoLAAgCAAiBCAAACAAAgIAAAiIAOCIgKNyKCkROEcAAl0BWYmAfQ8LYOAAABCAAAAAAAAAIQAAAAAAAAAAAAAA==	5-[1-hydroxy-2-(isopropylamino)ethyl]benzene-1,3-diol	5-[1-hydroxy-2-(propan-2-ylamino)ethyl]benzene-1,3-diol	5-[1-hydroxy-2-(propan-2-ylamino)ethyl]benzene-1,3-diol	5-[1-hydroxy-2-(propan-2-ylamino)ethyl]benzene-1,3-diol	5-[1-oxidanyl-2-(propan-2-ylamino)ethyl]benzene-1,3-diol	5-[1-hydroxy-2-(isopropylamino)ethyl]resorcinol	InChI=1S/C11H17NO3/c1-7(2)12-6-11(15)8-3-9(13)5-10(14)4-8/h3-5,7,11-15H,6H2,1-2H3	LMOINURANNBYCM-UHFFFAOYSA-N		211.121	C11H17NO3	211.260	CC(C)NCC(C1=CC(=CC(=C1)O)O)O	CC(C)NCC(C1=CC(=CC(=C1)O)O)O		211.121	0	15	0	1	0	0	0	1	15	1 5 255	11 14 8 12 13 8 13 15 8 14 15 8 5 16 3 8 11 8 8 12 8	TRUE	0	C:\Users\qiang\Documents\Schrodinger\glide-dock_XP_346	glide-dock_XP_346_pv.maegz	1
60961	1902	Structure2D_COMPOUND_CID_60961.1	60961	1	335	8	4	2	AAADccBzuAAAAAAAAAAAAAAAAAAAAWJAAAAsAAAAAAAAAFgB+AAAHgAQCAAACBzhlwYF8L9MFgCgAQZhZACAgC0REKABUCAoVBCDWAJAyEAeRAgPAALTACDwMAIAAAAAAAAAAAAAAAAAAAAAAAAAAAAAAA==	(2R,3R,4S,5R)-2-(6-aminopurin-9-yl)-5-(hydroxymethyl)tetrahydrofuran-3,4-diol	(2R,3R,4S,5R)-2-(6-aminopurin-9-yl)-5-(hydroxymethyl)oxolane-3,4-diol	(2<I>R</I>,3<I>R</I>,4<I>S</I>,5<I>R</I>)-2-(6-aminopurin-9-yl)-5-(hydroxymethyl)oxolane-3,4-diol	(2R,3R,4S,5R)-2-(6-aminopurin-9-yl)-5-(hydroxymethyl)oxolane-3,4-diol	(2R,3R,4S,5R)-2-(6-aminopurin-9-yl)-5-(hydroxymethyl)oxolane-3,4-diol	(2R,3R,4S,5R)-2-adenin-9-yl-5-methylol-tetrahydrofuran-3,4-diol	InChI=1S/C10H13N5O4/c11-8-5-9(13-2-12-8)15(3-14-5)10-7(18)6(17)4(1-16)19-10/h2-4,6-7,10,16-18H,1H2,(H2,11,12,13)/t4-,6-,7-,10-/m1/s1	OIRDTQYFTABQOQ-KQYNXXCUSA-N		267.097	C10H13N5O4	267.240	C1=NC(=C2C(=N1)N(C=N2)C3C(C(C(O3)CO)O)O)N	C1=NC(=C2C(=N1)N(C=N2)[C@H]3[C@@H]([C@@H]([C@H](O3)CO)O)O)N	140	267.097	0	19	4	0	0	0	0	1	3	1 5 255	13 14 5 15 17 8 17 18 8 10 2 6 12 3 6 11 5 5 5 15 8 5 16 8 6 16 8 6 17 8 7 15 8 7 19 8 8 18 8 8 19 8	TRUE	0	C:\Users\qiang\Documents\Schrodinger\glide-dock_XP_346	glide-dock_XP_346_pv.maegz	1
94230	1903	Structure2D_COMPOUND_CID_94230.1	94230	1	332	2	3	4	AAADccBzMAAAAAAAAAAAAAAAAAAAAWAAAAAwAAAAAAAAAFgB8AAAHgAQAAAADCjBngQ+wPLJkACoAzV3VACCgCAxAiAI2aG4ZJgIYPLAkbGUIAhglgDIyAcYicCOgAAAAAACAAAAAAAAAAQAAAAAAAAAAA==	(2S)-2-acetamido-3-(1H-indol-3-yl)propanamide	(2S)-2-acetamido-3-(1H-indol-3-yl)propanamide	(2<I>S</I>)-2-acetamido-3-(1<I>H</I>-indol-3-yl)propanamide	(2S)-2-acetamido-3-(1H-indol-3-yl)propanamide	(2S)-2-acetamido-3-(1H-indol-3-yl)propanamide	(2S)-2-acetamido-3-(1H-indol-3-yl)propionamide	InChI=1S/C13H15N3O2/c1-8(17)16-12(13(14)18)6-9-7-15-11-5-3-2-4-10(9)11/h2-5,7,12,15H,6H2,1H3,(H2,14,18)(H,16,17)/t12-/m0/s1	HNGIZKAMDMBRKJ-LBPRGKRZSA-N		245.116	C13H15N3O2	245.280	CC(=O)NC(CC1=CNC2=CC=CC=C21)C(=O)N	CC(=O)N[C@@H](CC1=CNC2=CC=CC=C21)C(=O)N	88	245.116	0	18	1	0	0	0	0	1	6	1 5 255	10 14 8 12 15 8 14 16 8 15 16 8 3 10 8 3 11 8 8 4 6 7 11 8 7 9 8 9 10 8 9 12 8	TRUE	0	C:\Users\qiang\Documents\Schrodinger\glide-dock_XP_346	glide-dock_XP_346_pv.maegz	1
3129	1904	Structure2D_COMPOUND_CID_3129.1	3129	1	407	4	2	13	AAADcfB7MAAAAAAAAAAAAAAAAAAAAAAAAAA8QAAAAAAAAAABAAAAHgAQCAAADDzhmAYyAIPABgCIAiFSEAACAAAgAAAIiIEICIgKdjKAkRGXcAAm1gGYmAeYyKCOAAAAAAAAAAAAAAAAAAAAAAAAAAAAAA==	N-[2-hydroxy-1-(morpholinomethyl)-2-phenyl-ethyl]decanamide	N-[1-hydroxy-3-(4-morpholinyl)-1-phenylpropan-2-yl]decanamide	<I>N</I>-(1-hydroxy-3-morpholin-4-yl-1-phenylpropan-2-yl)decanamide	N-(1-hydroxy-3-morpholin-4-yl-1-phenylpropan-2-yl)decanamide	N-(3-morpholin-4-yl-1-oxidanyl-1-phenyl-propan-2-yl)decanamide	N-[2-hydroxy-1-(morpholinomethyl)-2-phenyl-ethyl]capramide	InChI=1S/C23H38N2O3/c1-2-3-4-5-6-7-11-14-22(26)24-21(19-25-15-17-28-18-16-25)23(27)20-12-9-8-10-13-20/h8-10,12-13,21,23,27H,2-7,11,14-19H2,1H3,(H,24,26)	UYNCFCUHRNOSCN-UHFFFAOYSA-N	4.200	390.288	C23H38N2O3	390.600	CCCCCCCCCC(=O)NC(CN1CCOCC1)C(C2=CC=CC=C2)O	CCCCCCCCCC(=O)NC(CN1CCOCC1)C(C2=CC=CC=C2)O		390.288	0	28	0	2	0	0	0	1	-1	1 5 255	15 22 8 15 23 8 8 2 3 22 25 8 23 26 8 25 27 8 26 27 8 6 7 3	TRUE	0	C:\Users\qiang\Documents\Schrodinger\glide-dock_XP_346	glide-dock_XP_346_pv.maegz	1
101039147	1905	Structure2D_COMPOUND_CID_101039147.1	101039147	1	287	8	6	5	AAADceByOAAAAAAAAAAAAAAAAAAAASAAAAAAAAAAAAAAAAAAAAAAHgAQCAAACDzhgAYCCALABgAIAACQCAAAAAAAAAAAAIGIAAATEAIAgCAHQAAHEACXAAHwcAYAAAAAAAAAAAAAAAAAAAAAAAAAAAAAAA==	(2S)-2-[[(3S,4S,5R)-2,3,4-trihydroxy-5-(hydroxymethyl)tetrahydrofuran-2-yl]methylamino]propanoic acid	(2S)-2-[[(3S,4S,5R)-2,3,4-trihydroxy-5-(hydroxymethyl)-2-oxolanyl]methylamino]propanoic acid	(2<I>S</I>)-2-[[(3<I>S</I>,4<I>S</I>,5<I>R</I>)-2,3,4-trihydroxy-5-(hydroxymethyl)oxolan-2-yl]methylamino]propanoic acid	(2S)-2-[[(3S,4S,5R)-2,3,4-trihydroxy-5-(hydroxymethyl)oxolan-2-yl]methylamino]propanoic acid	(2S)-2-[[(3S,4S,5R)-5-(hydroxymethyl)-2,3,4-tris(oxidanyl)oxolan-2-yl]methylamino]propanoic acid	(2S)-2-[[(3S,4S,5R)-2,3,4-trihydroxy-5-methylol-tetrahydrofuran-2-yl]methylamino]propionic acid	InChI=1S/C9H17NO7/c1-4(8(14)15)10-3-9(16)7(13)6(12)5(2-11)17-9/h4-7,10-13,16H,2-3H2,1H3,(H,14,15)/t4-,5+,6+,7-,9?/m0/s1	BDMCSTCUMFCYDF-MBGOVIFWSA-N	-4.300	251.101	C9H17NO7	251.230	CC(C(=O)O)NCC1(C(C(C(O1)CO)O)O)O	C[C@@H](C(=O)O)NCC1([C@H]([C@@H]([C@H](O1)CO)O)O)O	140	251.101	0	17	4	1	0	0	0	1	-1	1 5 255	12 14 6 10 3 6 11 4 5 15 8 5 9 13 3	TRUE	0	C:\Users\qiang\Documents\Schrodinger\glide-dock_XP_346	glide-dock_XP_346_pv.maegz	1
92751	1906	Structure2D_COMPOUND_CID_92751.1	92751	1	490	8	5	3	AAADccBzPAAAAAAAAAAAAAAAAAAAASAAAAAgAAAAAAAAAAAAAAAAHgAQCAAACBzhgAYBCAPABgCIACXSWACAAAAAAgAACACIAECDFAIAgCAOUAAPFyKTEcDwMAIAAAAAAAAAAAAAAAAAAAAAAAAAAAAAAA==	3-[(2R,3R,4S,5R)-3,4-dihydroxy-5-(hydroxymethyl)tetrahydrofuran-2-yl]-2,6-dioxo-pyrimidine-4-carboxylic acid	3-[(2R,3R,4S,5R)-3,4-dihydroxy-5-(hydroxymethyl)-2-oxolanyl]-2,6-dioxo-4-pyrimidinecarboxylic acid	3-[(2<I>R</I>,3<I>R</I>,4<I>S</I>,5<I>R</I>)-3,4-dihydroxy-5-(hydroxymethyl)oxolan-2-yl]-2,6-dioxopyrimidine-4-carboxylic acid	3-[(2R,3R,4S,5R)-3,4-dihydroxy-5-(hydroxymethyl)oxolan-2-yl]-2,6-dioxopyrimidine-4-carboxylic acid	3-[(2R,3R,4S,5R)-5-(hydroxymethyl)-3,4-bis(oxidanyl)oxolan-2-yl]-2,6-bis(oxidanylidene)pyrimidine-4-carboxylic acid	3-[(2R,3R,4S,5R)-3,4-dihydroxy-5-methylol-tetrahydrofuran-2-yl]-2,6-diketo-pyrimidine-4-carboxylic acid	InChI=1S/C10H12N2O8/c13-2-4-6(15)7(16)8(20-4)12-3(9(17)18)1-5(14)11-10(12)19/h1,4,6-8,13,15-16H,2H2,(H,17,18)(H,11,14,19)/t4-,6-,7-,8-/m1/s1	FKCRAVPPBFWEJD-XVFCMESISA-N	-2.600	288.059	C10H12N2O8	288.210	C1=C(N(C(=O)NC1=O)C2C(C(C(O2)CO)O)O)C(=O)O	C1=C(N(C(=O)NC1=O)[C@H]2[C@@H]([C@@H]([C@H](O2)CO)O)O)C(=O)O	157	288.059	0	20	4	0	0	0	0	1	3	1 5 255	10 17 8 10 19 8 14 15 5 16 18 8 18 19 8 11 2 6 12 3 6 13 9 5 9 16 8 9 17 8	TRUE	0	C:\Users\qiang\Documents\Schrodinger\glide-dock_XP_346	glide-dock_XP_346_pv.maegz	1
71307583	1907	Structure2D_COMPOUND_CID_71307583.1	71307583	1	535	8	2	5	AAADceB4OYAAAAAAAAAAAAAAAAAAAaIAAAAwAAAAAAASAAABAAAAGwAACAAADRSgmBIwDoAABgCIAiDSCAACCAAgIAAIiAEGCIgNNjKEMRqCeCClwBELuAfK7LzOgAABAAAAAAAAAAIAAAAAAIQADAAAAA==	(3aS,4R,5R,6aR)-5-hydroxy-4-[(E,3R)-3-hydroxy-4-[3-(trifluoromethyl)phenoxy]but-1-enyl]-3,3a,4,5,6,6a-hexahydrocyclopenta[b]furan-2-one	(3aS,4R,5R,6aR)-5-hydroxy-4-[(E,3R)-3-hydroxy-4-[3-(trifluoromethyl)phenoxy]but-1-enyl]-3,3a,4,5,6,6a-hexahydrocyclopenta[b]furan-2-one	(3<I>a</I><I>S</I>,4<I>R</I>,5<I>R</I>,6<I>a</I><I>R</I>)-5-hydroxy-4-[(<I>E</I>,3<I>R</I>)-3-hydroxy-4-[3-(trifluoromethyl)phenoxy]but-1-enyl]-3,3<I>a</I>,4,5,6,6<I>a</I>-hexahydrocyclopenta[b]furan-2-one	(3aS,4R,5R,6aR)-5-hydroxy-4-[(E,3R)-3-hydroxy-4-[3-(trifluoromethyl)phenoxy]but-1-enyl]-3,3a,4,5,6,6a-hexahydrocyclopenta[b]furan-2-one	(3aS,4R,5R,6aR)-5-oxidanyl-4-[(E,3R)-3-oxidanyl-4-[3-(trifluoromethyl)phenoxy]but-1-enyl]-3,3a,4,5,6,6a-hexahydrocyclopenta[b]furan-2-one	(3aS,4R,5R,6aR)-5-hydroxy-4-[(E,3R)-3-hydroxy-4-[3-(trifluoromethyl)phenoxy]but-1-enyl]-3,3a,4,5,6,6a-hexahydrocyclopenta[b]furan-2-one	InChI=1S/C18H19F3O5/c19-18(20,21)10-2-1-3-12(6-10)25-9-11(22)4-5-13-14-7-17(24)26-16(14)8-15(13)23/h1-6,11,13-16,22-23H,7-9H2/b5-4+/t11-,13-,14+,15-,16-/m1/s1	XYSPYIAAWRUEML-GYQXSDTBSA-N	2.100	372.118	C18H19F3O5	372.300	C1C(C(C2C1OC(=O)C2)C=CC(COC3=CC=CC(=C3)C(F)(F)F)O)O	C1[C@H]([C@@H]([C@H]2[C@@H]1OC(=O)C2)/C=C/[C@H](COC3=CC=CC(=C3)C(F)(F)F)O)O	76	372.118	0	26	5	0	1	0	0	1	-1	1 5 255	10 15 6 11 29 5 20 21 8 20 22 8 21 23 8 22 24 8 23 25 8 24 25 8 12 5 5 18 7 6 9 27 5	TRUE	0	C:\Users\qiang\Documents\Schrodinger\glide-dock_XP_346	glide-dock_XP_346_pv.maegz	1
7099	1908	Structure2D_COMPOUND_CID_7099.1	7099	1	232	3	2	0	AAADccBzAAAAAAAAAAAAAAAAAAAAAAAAAAA8YIAAAAAAAACx/AAAHAAQAAAADAiBHgAwwPJIEACgAyRiRACCgCAhAiAImCAwZJgIIOLA0dGEJAhgkADIyAcQgMAOCAAAAAQCAAAQAAAACAQAAAAAAAAAAA==	acridine-3,6-diamine	acridine-3,6-diamine	acridine-3,6-diamine	acridine-3,6-diamine	acridine-3,6-diamine	(6-aminoacridin-3-yl)amine	InChI=1S/C13H11N3/c14-10-3-1-8-5-9-2-4-11(15)7-13(9)16-12(8)6-10/h1-7H,14-15H2	WDVSHHCDHLJJJR-UHFFFAOYSA-N		209.095	C13H11N3	209.250	C1=CC(=CC2=NC3=C(C=CC(=C3)N)C=C21)N	C1=CC(=CC2=NC3=C(C=CC(=C3)N)C=C21)N		209.095	0	16	0	0	0	0	0	1	-1	1 5 255	1 6 8 1 7 8 10 16 8 11 13 8 12 14 8 13 15 8 14 16 8 4 6 8 4 8 8 4 9 8 5 10 8 5 7 8 5 8 8 6 11 8 7 12 8 9 15 8	FALSE	0	C:\Users\qiang\Documents\Schrodinger\glide-dock_XP_346	glide-dock_XP_346_pv.maegz	1
44258657	1909	Structure2D_COMPOUND_CID_44258657.1	44258657	1	549	8	3	4	AAADceB4PAAAAAAAAAAAAAAAAAAAAAAAAAAwYIAAAAAAAACBQAAAGgAACAAADASAmAIyBoAABgCIAqBSAAACCAAkIAAIiAEGiMgNJzaGNRqCeWOl4BULuQfK7LzOIQABCAAIQABCAAIQABCAAAAAAAAAAA==	2-(2,4-dihydroxyphenyl)-5-hydroxy-6,7,8-trimethoxy-chromen-4-one	2-(2,4-dihydroxyphenyl)-5-hydroxy-6,7,8-trimethoxy-1-benzopyran-4-one	2-(2,4-dihydroxyphenyl)-5-hydroxy-6,7,8-trimethoxychromen-4-one	2-(2,4-dihydroxyphenyl)-5-hydroxy-6,7,8-trimethoxychromen-4-one	2-[2,4-bis(oxidanyl)phenyl]-6,7,8-trimethoxy-5-oxidanyl-chromen-4-one	2-(2,4-dihydroxyphenyl)-5-hydroxy-6,7,8-trimethoxy-chromone	InChI=1S/C18H16O8/c1-23-16-14(22)13-11(21)7-12(9-5-4-8(19)6-10(9)20)26-15(13)17(24-2)18(16)25-3/h4-7,19-20,22H,1-3H3	HAJJOCMWAKZDQM-UHFFFAOYSA-N	2.600	360.085	C18H16O8	360.300	COC1=C(C(=C2C(=C1O)C(=O)C=C(O2)C3=C(C=C(C=C3)O)O)OC)OC	COC1=C(C(=C2C(=C1O)C(=O)C=C(O2)C3=C(C=C(C=C3)O)O)OC)OC	115	360.085	0	26	0	0	0	0	0	1	-1	1 5 255	1 10 8 1 13 8 10 11 8 11 14 8 12 15 8 13 17 8 14 15 8 16 17 8 18 19 8 18 20 8 19 21 8 20 22 8 21 23 8 22 23 8 9 10 8 9 12 8 9 16 8	FALSE	0	C:\Users\qiang\Documents\Schrodinger\glide-dock_XP_346	glide-dock_XP_346_pv.maegz	1
15559187	1910	Structure2D_COMPOUND_CID_15559187.1	15559187	1	919	7	3	3	AAADcfB4OAAAAAAAAAAAAAAAAAAAAYIAAAA0YMEAAAAAAGDAAAAAGgAACAAAD1SwgAMCCAAABgCIAiDSCAAAAAAgAAAACAAAAEgRFAIAIQAiUAAFgAAPIQPA4PwPgAAAAAAAAADAAAYAADAAAYAADAAAAA==	3-[3-(4,5-dihydroxy-6-methyl-tetrahydropyran-2-yl)oxy-14-hydroxy-10,13-dimethyl-1,2,3,4,5,6,7,8,9,11,12,15,16,17-tetradecahydrocyclopenta[a]phenanthren-17-yl]-2H-furan-5-one	3-[3-[(4,5-dihydroxy-6-methyl-2-oxanyl)oxy]-14-hydroxy-10,13-dimethyl-1,2,3,4,5,6,7,8,9,11,12,15,16,17-tetradecahydrocyclopenta[a]phenanthren-17-yl]-2H-furan-5-one	3-[3-(4,5-dihydroxy-6-methyloxan-2-yl)oxy-14-hydroxy-10,13-dimethyl-1,2,3,4,5,6,7,8,9,11,12,15,16,17-tetradecahydrocyclopenta[a]phenanthren-17-yl]-2<I>H</I>-furan-5-one	3-[3-(4,5-dihydroxy-6-methyloxan-2-yl)oxy-14-hydroxy-10,13-dimethyl-1,2,3,4,5,6,7,8,9,11,12,15,16,17-tetradecahydrocyclopenta[a]phenanthren-17-yl]-2H-furan-5-one	3-[10,13-dimethyl-3-[6-methyl-4,5-bis(oxidanyl)oxan-2-yl]oxy-14-oxidanyl-1,2,3,4,5,6,7,8,9,11,12,15,16,17-tetradecahydrocyclopenta[a]phenanthren-17-yl]-2H-furan-5-one	3-[3-(4,5-dihydroxy-6-methyl-tetrahydropyran-2-yl)oxy-14-hydroxy-10,13-dimethyl-1,2,3,4,5,6,7,8,9,11,12,15,16,17-tetradecahydrocyclopenta[a]phenanthren-17-yl]-2H-furan-5-one	InChI=1S/C29H44O7/c1-16-26(32)23(30)14-25(35-16)36-19-6-9-27(2)18(13-19)4-5-22-21(27)7-10-28(3)20(8-11-29(22,28)33)17-12-24(31)34-15-17/h12,16,18-23,25-26,30,32-33H,4-11,13-15H2,1-3H3	NQOMDNMTNVQXRR-UHFFFAOYSA-N		504.309	C29H44O7	504.700	CC1C(C(CC(O1)OC2CCC3(C(C2)CCC4C3CCC5(C4(CCC5C6=CC(=O)OC6)O)C)C)O)O	CC1C(C(CC(O1)OC2CCC3(C(C2)CCC4C3CCC5(C4(CCC5C6=CC(=O)OC6)O)C)C)O)O	105	504.309	0	36	0	12	0	0	0	1	-1	1 5 255	8 1 3 10 14 3 11 23 3 12 24 3 13 19 3 16 27 3 26 2 3 30 2 3 34 36 3 33 6 3 35 7 3 9 17 3	TRUE	0	C:\Users\qiang\Documents\Schrodinger\glide-dock_XP_346	glide-dock_XP_346_pv.maegz	1
312247914	1911	DepositedStructure_SUBSTANCE_SID_312247914_Version_2.1																								0									1 3		FALSE	0	C:\Users\qiang\Documents\Schrodinger\glide-dock_XP_346	glide-dock_XP_346_pv.maegz	1	0	312247914	2			Quinoline-3-carboxamides 1-(4-fluorophenyl)-4-oxo-7-(4-pyridyl)quinoline-3-carboxamide AC1L9EJB C11694 SureCN10474454 CHEMBL41434		http://www.metabolomicsworkbench.org
151108	1912	Structure2D_COMPOUND_CID_151108.1	151108	1	158	6	5	1	AAADccBgOAAAAAAAAAAAAAAAAAAAAAAAAAAwAAAAAAAAAAAAAAAAGgAACAAACBSggAICAAAABgAAAAAAAAAAAAAAAAAAAAAAAAABEAIAAAAAQAAFAAADAAHAYAwAAAAAAAAAAAACAAAQAACAAAAAAAAAAA==	(1R,2S,4S,5R)-6-methoxycyclohexane-1,2,3,4,5-pentol	(1R,2S,4S,5R)-6-methoxycyclohexane-1,2,3,4,5-pentol	(1<I>R</I>,2<I>S</I>,4<I>S</I>,5<I>R</I>)-6-methoxycyclohexane-1,2,3,4,5-pentol	(1R,2S,4S,5R)-6-methoxycyclohexane-1,2,3,4,5-pentol	(1R,2S,4S,5R)-6-methoxycyclohexane-1,2,3,4,5-pentol	(1R,2S,4S,5R)-6-methoxycyclohexane-1,2,3,4,5-pentol	InChI=1S/C7H14O6/c1-13-7-5(11)3(9)2(8)4(10)6(7)12/h2-12H,1H3/t2?,3-,4-,5+,6+,7?/m0/s1	DSCFFEYYQKSRSV-MBXCVVGISA-N	-3.200	194.079	C7H14O6	194.180	COC1C(C(C(C(C1O)O)O)O)O	COC1[C@@H]([C@H](C([C@@H]([C@H]1O)O)O)O)O	110	194.079	0	13	4	0	0	0	0	1	-1	1 5 255	8 2 5 9 3 6 10 4 5 11 5 6	TRUE	0	C:\Users\qiang\Documents\Schrodinger\glide-dock_XP_346	glide-dock_XP_346_pv.maegz	1
247955	1913	Structure2D_COMPOUND_CID_247955.1	247955	1	443	8	4	2	AAADccBzuAAAAAAAAAAAAAAAAAAAAWJAAAAsAAAAAAAAAFgB+AAAHgAQCAAADBThmwYtsN9MFgCwBhJnZACigCkxAKAB2CAoRJiLuEJAyMEORAhPAALTQCjwMAIIgAAAAAAAAAAAAAAAAAAAAAAAAAAAAA==	4-amino-7-[3,4-dihydroxy-5-(hydroxymethyl)tetrahydrofuran-2-yl]pyrrolo[2,3-d]pyrimidine-5-carbonitrile	4-amino-7-[3,4-dihydroxy-5-(hydroxymethyl)-2-oxolanyl]-5-pyrrolo[2,3-d]pyrimidinecarbonitrile	4-amino-7-[3,4-dihydroxy-5-(hydroxymethyl)oxolan-2-yl]pyrrolo[2,3-d]pyrimidine-5-carbonitrile	4-amino-7-[3,4-dihydroxy-5-(hydroxymethyl)oxolan-2-yl]pyrrolo[2,3-d]pyrimidine-5-carbonitrile	4-azanyl-7-[5-(hydroxymethyl)-3,4-bis(oxidanyl)oxolan-2-yl]pyrrolo[2,3-d]pyrimidine-5-carbonitrile	4-amino-7-(3,4-dihydroxy-5-methylol-tetrahydrofuran-2-yl)pyrrolo[2,3-d]pyrimidine-5-carbonitrile	InChI=1S/C12H13N5O4/c13-1-5-2-17(11-7(5)10(14)15-4-16-11)12-9(20)8(19)6(3-18)21-12/h2,4,6,8-9,12,18-20H,3H2,(H2,14,15,16)	XOKJUSAYZUAMGJ-UHFFFAOYSA-N	-1.600	291.097	C12H13N5O4	291.260	C1=C(C2=C(N=CN=C2N1C3C(C(C(O3)CO)O)O)N)C#N	C1=C(C2=C(N=CN=C2N1C3C(C(C(O3)CO)O)O)N)C#N	150	291.097	0	21	0	4	0	0	0	1	-1	1 5 255	13 14 3 15 17 8 16 18 8 17 18 8 17 19 8 11 2 3 12 3 3 10 5 3 5 15 8 5 16 8 6 15 8 6 20 8 7 19 8 7 20 8	TRUE	0	C:\Users\qiang\Documents\Schrodinger\glide-dock_XP_346	glide-dock_XP_346_pv.maegz	1
274147427	1914	PubChem_substance_text_Polyporusterone B_records.6																								0											TRUE	0	C:\Users\qiang\Documents\Schrodinger\glide-dock_XP_346	glide-dock_XP_346_pv.maegz	6	0	274147427	2	11834	J459.848B	141360-91-0 Polyporusterone D	J459.848B	http://doi.org/10.15079/NIKKAJI
78171387	1915	Structure2D_COMPOUND_CID_78171387.1	78171387	1	237	7	5	4	AAADceBwOAAAAAAAAAAAAAAAAAAAAAAAAAAkAAAAAAAAAAAAAAAAGgAACAAACBSwgAMCCAAABgAAAAAAAAAAAAAAAAAAAAAAAAAREAIAAAAiQAAFAAAHAAHAYAwAAAAAAAAAAAAAAAAAAAAAAAAAAAAAAA==	2-(hydroxymethyl)-6-(2-hydroxy-1-methyl-propoxy)tetrahydropyran-3,4,5-triol	2-(3-hydroxybutan-2-yloxy)-6-(hydroxymethyl)oxane-3,4,5-triol	2-(3-hydroxybutan-2-yloxy)-6-(hydroxymethyl)oxane-3,4,5-triol	2-(3-hydroxybutan-2-yloxy)-6-(hydroxymethyl)oxane-3,4,5-triol	2-(hydroxymethyl)-6-(3-oxidanylbutan-2-yloxy)oxane-3,4,5-triol	2-(2-hydroxy-1-methyl-propoxy)-6-methylol-tetrahydropyran-3,4,5-triol	InChI=1S/C10H20O7/c1-4(12)5(2)16-10-9(15)8(14)7(13)6(3-11)17-10/h4-15H,3H2,1-2H3	ZLXYJEYKAQYNPV-UHFFFAOYSA-N	-1.900	252.121	C10H20O7	252.260	CC(C(C)OC1C(C(C(C(O1)CO)O)O)O)O	CC(C(C)OC1C(C(C(C(O1)CO)O)O)O)O	120	252.121	0	17	0	7	0	0	0	1	-1	1 5 255	11 13 3 14 16 3 12 2 3 8 3 3 9 4 3 10 5 3 15 7 3	TRUE	0	C:\Users\qiang\Documents\Schrodinger\glide-dock_XP_346	glide-dock_XP_346_pv.maegz	1
135926548	1916	Structure2D_COMPOUND_CID_135926548.1	135926548	1	815	13	4	2	AAADccBzuAJgAAAAAEAAAAAAAAAAAQAAAAAgQIAAAAAAAEiAAAAAHgQQACAACDzhwAYBAALABRCoQAVQdICAAAEgAAABCICIAEmDRAAAKCAfEAAAUQKaIEIAAAAAAAAAAAAAAAAAAAAAAAAAAAAAAAAAAA==	[(5aR,8R,9aR)-2-amino-4-oxo-6,7-disulfido-3,5,5a,8,9a,10-hexahydropyrano[3,2-g]pteridin-8-yl]methyl phosphate;oxo(thioxo)molybdenum(2+)	[(5aR,8R,9aR)-2-amino-4-oxo-6,7-disulfido-3,5,5a,8,9a,10-hexahydropyrano[3,2-g]pteridin-8-yl]methyl phosphate;oxo(sulfanylidene)molybdenum(2+)	[(5<I>a</I><I>R</I>,8<I>R</I>,9<I>a</I><I>R</I>)-2-amino-4-oxo-6,7-disulfido-3,5,5<I>a</I>,8,9<I>a</I>,10-hexahydropyrano[3,2-g]pteridin-8-yl]methyl phosphate;oxo(sulfanylidene)molybdenum(2+)	[(5aR,8R,9aR)-2-amino-4-oxo-6,7-disulfido-3,5,5a,8,9a,10-hexahydropyrano[3,2-g]pteridin-8-yl]methyl phosphate;oxo(sulfanylidene)molybdenum(2+)	[(5aR,8R,9aR)-2-azanyl-4-oxidanylidene-6,7-bis(sulfanidyl)-3,5,5a,8,9a,10-hexahydropyrano[3,2-g]pteridin-8-yl]methyl phosphate;oxidanylidene(sulfanylidene)molybdenum(2+)	[(5aR,8R,9aR)-2-amino-4-keto-6,7-disulfido-3,5,5a,8,9a,10-hexahydropyrano[3,2-g]pteridin-8-yl]methyl phosphate;keto(thioxo)molybdenum(2+)	InChI=1S/C10H14N5O6PS2.Mo.O.S/c11-10-14-7-4(8(16)15-10)12-3-6(24)5(23)2(21-9(3)13-7)1-20-22(17,18)19;;;/h2-3,9,12,23-24H,1H2,(H2,17,18,19)(H4,11,13,14,15,16);;;/q;+2;;/p-4/t2-,3+,9-;;;/m1.../s1	QNGJROMMAHOOFQ-JSUDGWJLSA-J		536.853	C10H10MoN5O7PS3-2	535.300	C(C1C(=C(C2C(O1)NC3=C(N2)C(=O)NC(=N3)N)[S-])[S-])OP(=O)([O-])[O-].O=[Mo+2]=S	C([C@@H]1C(=C([C@H]2[C@@H](O1)NC3=C(N2)C(=O)NC(=N3)N)[S-])[S-])OP(=O)([O-])[O-].O=[Mo+2]=S	224	536.853	-2	27	3	0	0	0	0	2	-1	1 5 255	15 24 8 15 27 8 16 26 8 16 27 8 18 28 6 19 29 6 21 25 5 23 24 8 23 26 8	TRUE	0	C:\Users\qiang\Documents\Schrodinger\glide-dock_XP_346	glide-dock_XP_346_pv.maegz	1
72968	1917	Structure2D_COMPOUND_CID_72968.1	72968	1	379	7	4	2	AAADccBzsAAAAAAAAAAAAAAAAAAAAWIAAAAsAAAAAAAAAFgB+AAAHgAQCAAADDzhlwYF8L9MEgCgAyZjZACAgC0xEKABWCAoVBiDXAJAyUAUVAgPwALZECPQUAMAAAAAAAAAAAAAAAAAAAAAAAAAAAAAAA==	(1S,2R,5R)-5-(6-aminopurin-9-yl)-3-(hydroxymethyl)cyclopent-3-ene-1,2-diol	(1S,2R,5R)-5-(6-aminopurin-9-yl)-3-(hydroxymethyl)cyclopent-3-ene-1,2-diol	(1<I>S</I>,2<I>R</I>,5<I>R</I>)-5-(6-aminopurin-9-yl)-3-(hydroxymethyl)cyclopent-3-ene-1,2-diol	(1S,2R,5R)-5-(6-aminopurin-9-yl)-3-(hydroxymethyl)cyclopent-3-ene-1,2-diol	(1S,2R,5R)-5-(6-aminopurin-9-yl)-3-(hydroxymethyl)cyclopent-3-ene-1,2-diol	(1S,2R,5R)-5-adenin-9-yl-3-methylol-cyclopent-3-ene-1,2-diol	InChI=1S/C11H13N5O3/c12-10-7-11(14-3-13-10)16(4-15-7)6-1-5(2-17)8(18)9(6)19/h1,3-4,6,8-9,17-19H,2H2,(H2,12,13,14)/t6-,8-,9+/m1/s1	XUGWUUDOWNZAGW-VDAHYXPESA-N		263.102	C11H13N5O3	263.250	C1=C(C(C(C1N2C=NC3=C(N=CN=C32)N)O)O)CO	C1=C([C@H]([C@H]([C@@H]1N2C=NC3=C(N=CN=C32)N)O)O)CO	130	263.102	0	19	3	0	0	0	0	1	3	1 5 255	10 1 5 14 17 8 17 18 8 11 2 5 4 14 8 4 16 8 9 4 6 5 16 8 5 17 8 6 14 8 6 19 8 7 18 8 7 19 8	TRUE	0	C:\Users\qiang\Documents\Schrodinger\glide-dock_XP_346	glide-dock_XP_346_pv.maegz	1
135926548	1918	Structure2D_COMPOUND_CID_135926548.1	135926548	1	815	13	4	2	AAADccBzuAJgAAAAAEAAAAAAAAAAAQAAAAAgQIAAAAAAAEiAAAAAHgQQACAACDzhwAYBAALABRCoQAVQdICAAAEgAAABCICIAEmDRAAAKCAfEAAAUQKaIEIAAAAAAAAAAAAAAAAAAAAAAAAAAAAAAAAAAA==	[(5aR,8R,9aR)-2-amino-4-oxo-6,7-disulfido-3,5,5a,8,9a,10-hexahydropyrano[3,2-g]pteridin-8-yl]methyl phosphate;oxo(thioxo)molybdenum(2+)	[(5aR,8R,9aR)-2-amino-4-oxo-6,7-disulfido-3,5,5a,8,9a,10-hexahydropyrano[3,2-g]pteridin-8-yl]methyl phosphate;oxo(sulfanylidene)molybdenum(2+)	[(5<I>a</I><I>R</I>,8<I>R</I>,9<I>a</I><I>R</I>)-2-amino-4-oxo-6,7-disulfido-3,5,5<I>a</I>,8,9<I>a</I>,10-hexahydropyrano[3,2-g]pteridin-8-yl]methyl phosphate;oxo(sulfanylidene)molybdenum(2+)	[(5aR,8R,9aR)-2-amino-4-oxo-6,7-disulfido-3,5,5a,8,9a,10-hexahydropyrano[3,2-g]pteridin-8-yl]methyl phosphate;oxo(sulfanylidene)molybdenum(2+)	[(5aR,8R,9aR)-2-azanyl-4-oxidanylidene-6,7-bis(sulfanidyl)-3,5,5a,8,9a,10-hexahydropyrano[3,2-g]pteridin-8-yl]methyl phosphate;oxidanylidene(sulfanylidene)molybdenum(2+)	[(5aR,8R,9aR)-2-amino-4-keto-6,7-disulfido-3,5,5a,8,9a,10-hexahydropyrano[3,2-g]pteridin-8-yl]methyl phosphate;keto(thioxo)molybdenum(2+)	InChI=1S/C10H14N5O6PS2.Mo.O.S/c11-10-14-7-4(8(16)15-10)12-3-6(24)5(23)2(21-9(3)13-7)1-20-22(17,18)19;;;/h2-3,9,12,23-24H,1H2,(H2,17,18,19)(H4,11,13,14,15,16);;;/q;+2;;/p-4/t2-,3+,9-;;;/m1.../s1	QNGJROMMAHOOFQ-JSUDGWJLSA-J		536.853	C10H10MoN5O7PS3-2	535.300	C(C1C(=C(C2C(O1)NC3=C(N2)C(=O)NC(=N3)N)[S-])[S-])OP(=O)([O-])[O-].O=[Mo+2]=S	C([C@@H]1C(=C([C@H]2[C@@H](O1)NC3=C(N2)C(=O)NC(=N3)N)[S-])[S-])OP(=O)([O-])[O-].O=[Mo+2]=S	224	536.853	-2	27	3	0	0	0	0	2	-1	1 5 255	15 24 8 15 27 8 16 26 8 16 27 8 18 28 6 19 29 6 21 25 5 23 24 8 23 26 8	TRUE	0	C:\Users\qiang\Documents\Schrodinger\glide-dock_XP_346	glide-dock_XP_346_pv.maegz	1
154035	1919	Structure2D_COMPOUND_CID_154035.1	154035	1	340	7	4	3	AAADceBwOAAAAAAAAAAAAAAAAAAAAAAAAAA0QAAAAAAAAAABAAAAGgAACAAADBSwmAMyDoAABgCIAiDSCAICCAAgIAAIiAFGCIgdNjaEMR6ieCCl4BEPqAfK7AxOIAAAAAAAAABAAAAAAAAAAAAAAAAAAA==	(2S,3S,4S,5R,6S)-3,4,5-trihydroxy-6-(4-methylphenoxy)tetrahydropyran-2-carboxylic acid	(2S,3S,4S,5R,6S)-3,4,5-trihydroxy-6-(4-methylphenoxy)-2-oxanecarboxylic acid	(2<I>S</I>,3<I>S</I>,4<I>S</I>,5<I>R</I>,6<I>S</I>)-3,4,5-trihydroxy-6-(4-methylphenoxy)oxane-2-carboxylic acid	(2S,3S,4S,5R,6S)-3,4,5-trihydroxy-6-(4-methylphenoxy)oxane-2-carboxylic acid	(2S,3S,4S,5R,6S)-6-(4-methylphenoxy)-3,4,5-tris(oxidanyl)oxane-2-carboxylic acid	(2S,3S,4S,5R,6S)-3,4,5-trihydroxy-6-(4-methylphenoxy)tetrahydropyran-2-carboxylic acid	InChI=1S/C13H16O7/c1-6-2-4-7(5-3-6)19-13-10(16)8(14)9(15)11(20-13)12(17)18/h2-5,8-11,13-16H,1H3,(H,17,18)/t8-,9-,10+,11-,13+/m0/s1	JPAUCQAJHLSMQW-XPORZQOISA-N	0.400	284.090	C13H16O7	284.260	CC1=CC=C(C=C1)OC2C(C(C(C(O2)C(=O)O)O)O)O	CC1=CC=C(C=C1)O[C@H]2[C@@H]([C@H]([C@@H]([C@H](O2)C(=O)O)O)O)O	116	284.090	0	20	5	0	0	0	0	1	1	1 5 255	11 13 5 14 15 8 14 16 8 15 18 8 16 19 8 17 18 8 17 19 8 12 2 5 8 3 5 9 4 6 10 5 6	TRUE	0	C:\Users\qiang\Documents\Schrodinger\glide-dock_XP_346	glide-dock_XP_346_pv.maegz	1
44258471	1920	PubChem_compound_text_Scutellarein 6,4'-dimethyl ether 7-(6''-acetylglucoside)_records.1	44258471	1	840	12	4	8	AAADceB4PAAAAAAAAAAAAAAAAAAAAAAAAAA0YIEAAAAAAACBQAAAGgAACAAADBSwmAMyDoAABgCIAqDSCAACCAAkIAAIiAEGiMgdNzaGNRqieWOl4BUPuQfK7LzOIQABCAAIQABCAAIQABCAAAAAAAAAAA==	[(3S,4S,6S)-3,4,5-trihydroxy-6-[5-hydroxy-6-methoxy-2-(4-methoxyphenyl)-4-oxo-chromen-7-yl]oxy-tetrahydropyran-2-yl]methyl acetate	acetic acid [(3S,4S,6S)-3,4,5-trihydroxy-6-[[5-hydroxy-6-methoxy-2-(4-methoxyphenyl)-4-oxo-1-benzopyran-7-yl]oxy]-2-oxanyl]methyl ester	[(3<I>S</I>,4<I>S</I>,6<I>S</I>)-3,4,5-trihydroxy-6-[5-hydroxy-6-methoxy-2-(4-methoxyphenyl)-4-oxochromen-7-yl]oxyoxan-2-yl]methyl acetate	[(3S,4S,6S)-3,4,5-trihydroxy-6-[5-hydroxy-6-methoxy-2-(4-methoxyphenyl)-4-oxochromen-7-yl]oxyoxan-2-yl]methyl acetate	[(3S,4S,6S)-6-[6-methoxy-2-(4-methoxyphenyl)-5-oxidanyl-4-oxidanylidene-chromen-7-yl]oxy-3,4,5-tris(oxidanyl)oxan-2-yl]methyl ethanoate	acetic acid [(3S,4S,6S)-3,4,5-trihydroxy-6-[5-hydroxy-4-keto-6-methoxy-2-(4-methoxyphenyl)chromen-7-yl]oxy-tetrahydropyran-2-yl]methyl ester	InChI=1S/C25H26O12/c1-11(26)34-10-18-20(28)22(30)23(31)25(37-18)36-17-9-16-19(21(29)24(17)33-3)14(27)8-15(35-16)12-4-6-13(32-2)7-5-12/h4-9,18,20,22-23,25,28-31H,10H2,1-3H3/t18?,20-,22+,23?,25-/m1/s1	FHBWUJAADRENKL-YYBMTHDGSA-N	1.200	518.142	C25H26O12	518.500	CC(=O)OCC1C(C(C(C(O1)OC2=C(C(=C3C(=C2)OC(=CC3=O)C4=CC=C(C=C4)OC)O)OC)O)O)O	CC(=O)OCC1[C@H]([C@@H](C([C@@H](O1)OC2=C(C(=C3C(=C2)OC(=CC3=O)C4=CC=C(C=C4)OC)O)OC)O)O)O	170	518.142	0	37	3	2	0	0	0	1	-1	1 5 255	15 18 3 19 20 8 19 21 8 17 2 5 20 24 8 21 22 8 22 23 8 23 24 8 23 26 8 26 29 8 27 29 8 13 3 6 30 32 8 30 33 8 32 34 8 33 35 8 34 36 8 35 36 8 14 4 5 16 5 3 7 22 8 7 27 8	TRUE	0	C:\Users\qiang\Documents\Schrodinger\glide-dock_XP_346	glide-dock_XP_346_pv.maegz	1
83856	1921	PubChem_compound_text_Lauryl hydrogen sulfate_records.32	83856	1	651	9	1	18	AAADcfB+PABAAAAAAAAAAAAAAAAAAAAAAAA8YIAAAAAAAACx9AAAHgAACAAADAzhngY+htIIFICgAzRnRDCCiCAxIiAI2CA+7JgNJuLEsZuEMCpkwBHK6Aew0PMOoAABAAAQQABAAAIAACCAAAAAAAAAAA==	1-[(3,4-dimethoxyphenyl)methyl]-6,7-dimethoxy-isoquinoline;dodecyl hydrogen sulfate	1-[(3,4-dimethoxyphenyl)methyl]-6,7-dimethoxyisoquinoline;sulfuric acid dodecyl ester	1-[(3,4-dimethoxyphenyl)methyl]-6,7-dimethoxyisoquinoline;dodecyl hydrogen sulfate	1-[(3,4-dimethoxyphenyl)methyl]-6,7-dimethoxyisoquinoline;dodecyl hydrogen sulfate	1-[(3,4-dimethoxyphenyl)methyl]-6,7-dimethoxy-isoquinoline;dodecyl hydrogen sulfate	6,7-dimethoxy-1-veratryl-isoquinoline;sulfuric acid lauryl ester	InChI=1S/C20H21NO4.C12H26O4S/c1-22-17-6-5-13(10-18(17)23-2)9-16-15-12-20(25-4)19(24-3)11-14(15)7-8-21-16;1-2-3-4-5-6-7-8-9-10-11-12-16-17(13,14)15/h5-8,10-12H,9H2,1-4H3;2-12H2,1H3,(H,13,14,15)	VXTZBUZHTLVWHW-UHFFFAOYSA-N		605.302	C32H47NO8S	605.800	CCCCCCCCCCCCOS(=O)(=O)O.COC1=C(C=C(C=C1)CC2=NC=CC3=CC(=C(C=C32)OC)OC)OC	CCCCCCCCCCCCOS(=O)(=O)O.COC1=C(C=C(C=C1)CC2=NC=CC3=CC(=C(C=C32)OC)OC)OC		605.302	0	42	0	0	0	0	0	2	1	1 5 255	10 24 8 10 35 8 23 24 8 23 26 8 23 28 8 26 29 8 26 31 8 27 33 8 27 34 8 28 30 8 29 32 8 30 32 8 31 35 8 33 36 8 34 37 8 36 38 8 37 38 8	FALSE	0	C:\Users\qiang\Documents\Schrodinger\glide-dock_XP_346	glide-dock_XP_346_pv.maegz	32
5326317	1922	Structure2D_COMPOUND_CID_5326317.1	5326317	1	202	4	3	2	AAADccBwOAAAAAAAAAAAAAAAAAAAAAAAAAAwAAAAAAAAAAABAAAAGgAACAAADQSAmAAyBoAAAgCIAqBSAAACAAAkIAAAiAEGCMgIJzaCFRKAcUAl4BUImQeI7OTOIAAACAAIAABAAAAQABAAAAAAAAAAAA==	2-methyl-1-(2,4,6-trihydroxyphenyl)propan-1-one	2-methyl-1-(2,4,6-trihydroxyphenyl)-1-propanone	2-methyl-1-(2,4,6-trihydroxyphenyl)propan-1-one	2-methyl-1-(2,4,6-trihydroxyphenyl)propan-1-one	2-methyl-1-[2,4,6-tris(oxidanyl)phenyl]propan-1-one	2-methyl-1-(2,4,6-trihydroxyphenyl)propan-1-one	InChI=1S/C10H12O4/c1-5(2)10(14)9-7(12)3-6(11)4-8(9)13/h3-5,11-13H,1-2H3	BNEBXEZRBLYBCZ-UHFFFAOYSA-N	2.100	196.074	C10H12O4	196.200	CC(C)C(=O)C1=C(C=C(C=C1O)O)O	CC(C)C(=O)C1=C(C=C(C=C1O)O)O		196.074	0	14	0	0	0	0	0	1	-1	1 5 255	10 12 8 11 13 8 12 14 8 13 14 8 7 10 8 7 11 8	FALSE	0	C:\Users\qiang\Documents\Schrodinger\glide-dock_XP_346	glide-dock_XP_346_pv.maegz	1
14507160	1923	Structure2D_COMPOUND_CID_14507160.1	14507160	1	548	7	1	3	AAADccB4OAAAAAAAAAAAAAAAAAAAASAAAAAwYIAAAAAAAEiBQAAAGgAACAAADASgmAMyDoAABgCIAqBSAAACCAAkIAAIiAEGiMgdJzaGNRqgcWMl4BUPuYfK7PzOIQABCAAIQABCAAIQABCAAAAAAAAAAA==	7-(3,4-dimethoxyphenyl)-9-hydroxy-[1,3]dioxolo[4,5-g]chromen-8-one	7-(3,4-dimethoxyphenyl)-9-hydroxy-[1,3]dioxolo[4,5-g][1]benzopyran-8-one	7-(3,4-dimethoxyphenyl)-9-hydroxy-[1,3]dioxolo[4,5-g]chromen-8-one	7-(3,4-dimethoxyphenyl)-9-hydroxy-[1,3]dioxolo[4,5-g]chromen-8-one	7-(3,4-dimethoxyphenyl)-9-oxidanyl-[1,3]dioxolo[4,5-g]chromen-8-one	7-(3,4-dimethoxyphenyl)-9-hydroxy-[1,3]dioxolo[4,5-g]chromen-8-one	InChI=1S/C18H14O7/c1-21-11-4-3-9(5-12(11)22-2)10-7-23-13-6-14-18(25-8-24-14)17(20)15(13)16(10)19/h3-7,20H,8H2,1-2H3	ZXWGLCIRUZGYPA-UHFFFAOYSA-N	3.100	342.074	C18H14O7	342.300	COC1=C(C=C(C=C1)C2=COC3=CC4=C(C(=C3C2=O)O)OCO4)OC	COC1=C(C=C(C=C1)C2=COC3=CC4=C(C(=C3C2=O)O)OCO4)OC		342.074	0	25	0	0	0	0	0	1	-1	1 5 255	1 17 8 1 9 8 10 11 8 10 13 8 12 14 8 12 17 8 13 15 8 16 19 8 16 20 8 19 21 8 20 23 8 21 22 8 22 23 8 8 11 8 8 14 8 8 9 8 9 15 8	FALSE	0	C:\Users\qiang\Documents\Schrodinger\glide-dock_XP_346	glide-dock_XP_346_pv.maegz	1
892	1924	Structure2D_COMPOUND_CID_892.1	892	1	104	6	6	0	AAADccBgOAAAAAAAAAAAAAAAAAAAAAAAAAAwAAAAAAAAAAAAAAAAGgAACAAACBSggAIAAAAAAgAAAAAAAAAAAAAAAAAAAAAAAAABEAIAAAAAQAAFAAABAAHAYAQAAAAAAAAAAAACAAAQAACAAAAAAAAAAA==	cyclohexane-1,2,3,4,5,6-hexol	cyclohexane-1,2,3,4,5,6-hexol	cyclohexane-1,2,3,4,5,6-hexol	cyclohexane-1,2,3,4,5,6-hexol	cyclohexane-1,2,3,4,5,6-hexol	cyclohexane-1,2,3,4,5,6-hexol	InChI=1S/C6H12O6/c7-1-2(8)4(10)6(12)5(11)3(1)9/h1-12H	CDAISMWEOUEBRE-UHFFFAOYSA-N	-3.700	180.063	C6H12O6	180.160	C1(C(C(C(C(C1O)O)O)O)O)O	C1(C(C(C(C(C1O)O)O)O)O)O	121	180.063	0	12	0	0	0	0	0	1	-1	1 5 255	7 1 5 8 2 6 9 3 6 10 4 6 11 5 6 12 6 6	FALSE	0	C:\Users\qiang\Documents\Schrodinger\glide-dock_XP_346	glide-dock_XP_346_pv.maegz	1
168948	1925	Structure2D_COMPOUND_CID_168948 (1).1	168948	1	321	7	3	3	AAADccBzsAAAAAAAAAAAAAAAAAAAAWJAAAAsAAAAAAAAAFgB+AAAHgAQCAAACBzhlwYH8L/MFgCgAQZhZACAgC0REKABUKAoVBCBWAJAyEAeRAgPAALDACCwMAIAAAAAAAAAAAAAAAAAAAAAAAAAAAAAAA==	(2R,3S,5R)-2-(hydroxymethyl)-5-[6-(methylamino)purin-9-yl]tetrahydrofuran-3-ol	(2R,3S,5R)-2-(hydroxymethyl)-5-[6-(methylamino)-9-purinyl]-3-oxolanol	(2<I>R</I>,3<I>S</I>,5<I>R</I>)-2-(hydroxymethyl)-5-[6-(methylamino)purin-9-yl]oxolan-3-ol	(2R,3S,5R)-2-(hydroxymethyl)-5-[6-(methylamino)purin-9-yl]oxolan-3-ol	(2R,3S,5R)-2-(hydroxymethyl)-5-[6-(methylamino)purin-9-yl]oxolan-3-ol	(2R,3S,5R)-5-[6-(methylamino)purin-9-yl]-2-methylol-tetrahydrofuran-3-ol	InChI=1S/C11H15N5O3/c1-12-10-9-11(14-4-13-10)16(5-15-9)8-2-6(18)7(3-17)19-8/h4-8,17-18H,2-3H2,1H3,(H,12,13,14)/t6-,7+,8+/m0/s1	DYSDOYRQWBDGQQ-XLPZGREQSA-N		265.117	C11H15N5O3	265.270	CNC1=C2C(=NC=N1)N(C=N2)C3CC(C(O3)CO)O	CNC1=C2C(=NC=N1)N(C=N2)[C@H]3C[C@@H]([C@H](O3)CO)O	105	265.117	0	19	3	0	0	0	0	1	3	1 5 255	12 13 5 14 16 8 16 17 8 10 2 6 4 14 8 4 15 8 9 4 5 5 15 8 5 16 8 6 14 8 6 18 8 7 17 8 7 18 8	TRUE	0	C:\Users\qiang\Documents\Schrodinger\glide-dock_XP_346	glide-dock_XP_346_pv.maegz	1
168948	1926	Structure2D_COMPOUND_CID_168948.1	168948	1	321	7	3	3	AAADccBzsAAAAAAAAAAAAAAAAAAAAWJAAAAsAAAAAAAAAFgB+AAAHgAQCAAACBzhlwYH8L/MFgCgAQZhZACAgC0REKABUKAoVBCBWAJAyEAeRAgPAALDACCwMAIAAAAAAAAAAAAAAAAAAAAAAAAAAAAAAA==	(2R,3S,5R)-2-(hydroxymethyl)-5-[6-(methylamino)purin-9-yl]tetrahydrofuran-3-ol	(2R,3S,5R)-2-(hydroxymethyl)-5-[6-(methylamino)-9-purinyl]-3-oxolanol	(2<I>R</I>,3<I>S</I>,5<I>R</I>)-2-(hydroxymethyl)-5-[6-(methylamino)purin-9-yl]oxolan-3-ol	(2R,3S,5R)-2-(hydroxymethyl)-5-[6-(methylamino)purin-9-yl]oxolan-3-ol	(2R,3S,5R)-2-(hydroxymethyl)-5-[6-(methylamino)purin-9-yl]oxolan-3-ol	(2R,3S,5R)-5-[6-(methylamino)purin-9-yl]-2-methylol-tetrahydrofuran-3-ol	InChI=1S/C11H15N5O3/c1-12-10-9-11(14-4-13-10)16(5-15-9)8-2-6(18)7(3-17)19-8/h4-8,17-18H,2-3H2,1H3,(H,12,13,14)/t6-,7+,8+/m0/s1	DYSDOYRQWBDGQQ-XLPZGREQSA-N		265.117	C11H15N5O3	265.270	CNC1=C2C(=NC=N1)N(C=N2)C3CC(C(O3)CO)O	CNC1=C2C(=NC=N1)N(C=N2)[C@H]3C[C@@H]([C@H](O3)CO)O	105	265.117	0	19	3	0	0	0	0	1	3	1 5 255	12 13 5 14 16 8 16 17 8 10 2 6 4 14 8 4 15 8 9 4 5 5 15 8 5 16 8 6 14 8 6 18 8 7 17 8 7 18 8	TRUE	0	C:\Users\qiang\Documents\Schrodinger\glide-dock_XP_346	glide-dock_XP_346_pv.maegz	1
103565301	1927	PubChem_substance_text_Polyporusterone B_records.4																								0									1 3	1 27 5 13 31 5 14 34 6 17 32 6 18 20 6 19 35 6 2 28 5 5 29 5 6 30 5 9 33 6	TRUE	0	C:\Users\qiang\Documents\Schrodinger\glide-dock_XP_346	glide-dock_XP_346_pv.maegz	4	0	103565301	8	ChEMBL	CHEMBL409505	Polyporusterone G CHEMBL409505	CHEMBL409505	https://www.ebi.ac.uk/chembl/
637541	1928	Structure2D_COMPOUND_CID_637541.1	637541	1	186	3	2	2	AAADccBwMAAAAAAAAAAAAAAAAAAAAAAAAAAwAAAAAAAAAAABAAAAGgAACAAADASAmAAwDoAAAgCIAiDSCAACAAAgIAAIiAAGCMgIJiKCERKAcAAkwBEImYeAwBAOAAABAAAAAAAAAAIAAAAAAAAAAAAAAA==	(E)-3-(3-hydroxyphenyl)prop-2-enoic acid	(E)-3-(3-hydroxyphenyl)-2-propenoic acid	(<I>E</I>)-3-(3-hydroxyphenyl)prop-2-enoic acid	(E)-3-(3-hydroxyphenyl)prop-2-enoic acid	(E)-3-(3-hydroxyphenyl)prop-2-enoic acid	(E)-3-(3-hydroxyphenyl)acrylic acid	InChI=1S/C9H8O3/c10-8-3-1-2-7(6-8)4-5-9(11)12/h1-6,10H,(H,11,12)/b5-4+	KKSDGJDHHZEWEP-SNAWJCMRSA-N		164.047	C9H8O3	164.160	C1=CC(=CC(=C1)O)C=CC(=O)O	C1=CC(=CC(=C1)O)/C=C/C(=O)O		164.047	0	12	0	0	1	0	0	1	3	1 5 255	4 5 8 4 6 8 5 7 8 6 8 8 7 10 8 8 10 8	FALSE	0	C:\Users\qiang\Documents\Schrodinger\glide-dock_XP_346	glide-dock_XP_346_pv.maegz	1
157010667	1929	PubChem_compound_text_Lauryl hydrogen sulfate_records.13	157010667	1	502	7	4	24	AAADcfB6OABAAAAAAAAAAAAAAAAAAAAAAAAwAAAAAAAAAAABAAAAHgAQCAAADIihmAIyAIBAAoCAAiBCADACAAAgAAAIiAAAAIgKMCKAkRCAYAAlkAAIiAeQwPAOQAAAAAAAAACAAAAAAAAAAAAAAAAAAA==	2-amino-2-[2-(4-octylphenyl)ethyl]propane-1,3-diol;dodecyl hydrogen sulfate	2-amino-2-[2-(4-octylphenyl)ethyl]propane-1,3-diol;sulfuric acid dodecyl ester	2-amino-2-[2-(4-octylphenyl)ethyl]propane-1,3-diol;dodecyl hydrogen sulfate	2-amino-2-[2-(4-octylphenyl)ethyl]propane-1,3-diol;dodecyl hydrogen sulfate	2-azanyl-2-[2-(4-octylphenyl)ethyl]propane-1,3-diol;dodecyl hydrogen sulfate	2-amino-2-[2-(4-octylphenyl)ethyl]propane-1,3-diol;sulfuric acid lauryl ester	InChI=1S/C19H33NO2.C12H26O4S/c1-2-3-4-5-6-7-8-17-9-11-18(12-10-17)13-14-19(20,15-21)16-22;1-2-3-4-5-6-7-8-9-10-11-12-16-17(13,14)15/h9-12,21-22H,2-8,13-16,20H2,1H3;2-12H2,1H3,(H,13,14,15)	XTLZVNMZICNQBB-UHFFFAOYSA-N		573.406	C31H59NO6S	573.900	CCCCCCCCCCCCOS(=O)(=O)O.CCCCCCCCC1=CC=C(C=C1)CCC(CO)(CO)N	CCCCCCCCCCCCOS(=O)(=O)O.CCCCCCCCC1=CC=C(C=C1)CCC(CO)(CO)N		573.406	0	39	0	0	0	0	0	2	-1	1 5 255	20 30 8 20 31 8 27 33 8 27 34 8 30 33 8 31 34 8	FALSE	0	C:\Users\qiang\Documents\Schrodinger\glide-dock_XP_346	glide-dock_XP_346_pv.maegz	13
52931396	1930	Structure2D_COMPOUND_CID_52931396.1	52931396	1	810	1	1	6	AAADcfB4IAAAAAAAAAAAAAAAAAAAAQAAAAAwQIAAAAAAAECAAAAAGgAACAAADxSggAICAAAAAgCAAiBCAAAAAAAgAAAACAAAAAgIFAIAAQAAQAAEgAAIkAOAwPAPgAAAAAAAAABAAAIAACAAAAAAAAAAAA==	(3S,5R,10S,13R,17R)-17-[(1R,4S)-4-ethyl-1,5-dimethyl-hexyl]-10,13-dimethyl-4-methylene-1,2,3,5,6,12,16,17-octahydrocyclopenta[a]phenanthren-3-ol	(3S,5R,10S,13R,17R)-17-[(2R,5S)-5-ethyl-6-methylheptan-2-yl]-10,13-dimethyl-4-methylene-1,2,3,5,6,12,16,17-octahydrocyclopenta[a]phenanthren-3-ol	(3<I>S</I>,5<I>R</I>,10<I>S</I>,13<I>R</I>,17<I>R</I>)-17-[(2<I>R</I>,5<I>S</I>)-5-ethyl-6-methylheptan-2-yl]-10,13-dimethyl-4-methylidene-1,2,3,5,6,12,16,17-octahydrocyclopenta[a]phenanthren-3-ol	(3S,5R,10S,13R,17R)-17-[(2R,5S)-5-ethyl-6-methylheptan-2-yl]-10,13-dimethyl-4-methylidene-1,2,3,5,6,12,16,17-octahydrocyclopenta[a]phenanthren-3-ol	(3S,5R,10S,13R,17R)-17-[(2R,5S)-5-ethyl-6-methyl-heptan-2-yl]-10,13-dimethyl-4-methylidene-1,2,3,5,6,12,16,17-octahydrocyclopenta[a]phenanthren-3-ol	(3S,5R,10S,13R,17R)-17-[(1R,4S)-4-ethyl-1,5-dimethyl-hexyl]-10,13-dimethyl-4-methylene-1,2,3,5,6,12,16,17-octahydrocyclopenta[a]phenanthren-3-ol	InChI=1S/C30H46O/c1-8-22(19(2)3)10-9-20(4)24-13-14-26-23-11-12-25-21(5)28(31)16-18-30(25,7)27(23)15-17-29(24,26)6/h11,14-15,19-20,22,24-25,28,31H,5,8-10,12-13,16-18H2,1-4,6-7H3/t20-,22+,24-,25+,28+,29-,30+/m1/s1	GCDLGQKWZFXBSJ-RWSIXSPXSA-N	7.600	422.355	C30H46O	422.700	CCC(CCC(C)C1CC=C2C1(CC=C3C2=CCC4C3(CCC(C4=C)O)C)C)C(C)C	CC[C@@H](CC[C@@H](C)[C@H]1CC=C2[C@@]1(CC=C3C2=CC[C@@H]4[C@@]3(CC[C@@H](C4=C)O)C)C)C(C)C		422.355	0	31	7	0	0	0	0	1	-1	1 5 255	22 1 5 10 23 6 2 16 5 25 24 5 3 32 6 4 20 5 6 33 6	TRUE	0	C:\Users\qiang\Documents\Schrodinger\glide-dock_XP_346	glide-dock_XP_346_pv.maegz	1
158980	1931	Structure2D_COMPOUND_CID_158980.1	158980	1	148	5	2	4	AAADccBiMABAAAAAAAAAAAAAAAAAAAAAAAAAAAAAAAAAAAAAAAAAHgQQCAAACCjFwASCCABAAgoIAACQCEBAAAAAABAAAIGAAAACABAgAAAAQAAEEAAAAAAAAAAAAAAAAAAAAAAAAAAAAAAAAAAAAAAAAA==	(2S)-2-amino-4-methylsulfinyl-butanoic acid	(2S)-2-amino-4-methylsulfinylbutanoic acid	(2<I>S</I>)-2-amino-4-methylsulfinylbutanoic acid	(2S)-2-amino-4-methylsulfinylbutanoic acid	(2S)-2-azanyl-4-methylsulfinyl-butanoic acid	(2S)-2-amino-4-methylsulfinyl-butyric acid	InChI=1S/C5H11NO3S/c1-10(9)3-2-4(6)5(7)8/h4H,2-3,6H2,1H3,(H,7,8)/t4-,10?/m0/s1	QEFRNWWLZKMPFJ-YGVKFDHGSA-N		165.046	C5H11NO3S	165.210	CS(=O)CCC(C(=O)O)N	CS(=O)CC[C@@H](C(=O)O)N		165.046	0	10	1	1	0	0	0	1	1	1 5 255	1 10 3 7 5 6	TRUE	0	C:\Users\qiang\Documents\Schrodinger\glide-dock_XP_346	glide-dock_XP_346_pv.maegz	1
16218957	1932	Structure2D_COMPOUND_CID_16218957.1	16218957	1	759	3	1	15	AAADcfB6MAAAAAAAAAAAAAAAAAAAAAAAAAAwQAAAAAAAAACBAAAAHgAQAAAADAyBmAAyzoLABACIAiXSWACCCAAhIgAIiAEGbMgMJjLEsZuGOijm1BnI6QeY0KMOCAAAAgAIAAAQAAAEABAAAAAAAAAAAA==	(5Z,8Z,11Z,14Z)-N-(4-methyl-2-oxo-chromen-7-yl)icosa-5,8,11,14-tetraenamide	(5Z,8Z,11Z,14Z)-N-(4-methyl-2-oxo-1-benzopyran-7-yl)eicosa-5,8,11,14-tetraenamide	(5<I>Z</I>,8<I>Z</I>,11<I>Z</I>,14<I>Z</I>)-<I>N</I>-(4-methyl-2-oxochromen-7-yl)icosa-5,8,11,14-tetraenamide	(5Z,8Z,11Z,14Z)-N-(4-methyl-2-oxochromen-7-yl)icosa-5,8,11,14-tetraenamide	(5Z,8Z,11Z,14Z)-N-(4-methyl-2-oxidanylidene-chromen-7-yl)icosa-5,8,11,14-tetraenamide	(5Z,8Z,11Z,14Z)-N-(2-keto-4-methyl-chromen-7-yl)eicosa-5,8,11,14-tetraenamide	InChI=1S/C30H39NO3/c1-3-4-5-6-7-8-9-10-11-12-13-14-15-16-17-18-19-20-29(32)31-26-21-22-27-25(2)23-30(33)34-28(27)24-26/h7-8,10-11,13-14,16-17,21-24H,3-6,9,12,15,18-20H2,1-2H3,(H,31,32)/b8-7-,11-10-,14-13-,17-16-	IQPBUDMTXHWSHB-ZKWNWVNESA-N		461.293	C30H39NO3	461.600	CCCCCC=CCC=CCC=CCC=CCCCC(=O)NC1=CC2=C(C=C1)C(=CC(=O)O2)C	CCCCC/C=C\C/C=C\C/C=C\C/C=C\CCCC(=O)NC1=CC2=C(C=C1)C(=CC(=O)O2)C		461.293	0	34	0	0	4	0	0	1	-1	1 5 255	1 17 8 1 30 8 14 17 8 14 19 8 14 22 8 15 18 8 15 23 8 17 18 8 19 26 8 22 23 8 26 30 8	FALSE	0	C:\Users\qiang\Documents\Schrodinger\glide-dock_XP_346	glide-dock_XP_346_pv.maegz	1
41648	1933	Structure2D_COMPOUND_CID_41648.1	41648	1	235	3	1	2	AAADceBzMAAAAAAAAAAAAAAAAAAAAWAAAAAAAAAAAAAAAAABgAAAHgAUAAAADgSBkgQztJPQAACpAKJycgCAAAAlIgAhGCE+bFqAJApAkICEAIhqlwpISGIQAAANAAAAAAAAAAAAAAAAAAAAAAAAAAAAAA==	3-(5-tert-butylisoxazol-3-yl)-1,1-dimethyl-urea	3-(5-tert-butyl-3-isoxazolyl)-1,1-dimethylurea	3-(5-<I>tert</I>-butyl-1,2-oxazol-3-yl)-1,1-dimethylurea	3-(5-tert-butyl-1,2-oxazol-3-yl)-1,1-dimethylurea	3-(5-tert-butyl-1,2-oxazol-3-yl)-1,1-dimethyl-urea	3-(5-tert-butylisoxazol-3-yl)-1,1-dimethyl-urea	InChI=1S/C10H17N3O2/c1-10(2,3)7-6-8(12-15-7)11-9(14)13(4)5/h6H,1-5H3,(H,11,12,14)	JLLJHQLUZAKJFH-UHFFFAOYSA-N	1.600	211.132	C10H17N3O2	211.260	CC(C)(C)C1=CC(=NO1)NC(=O)N(C)C	CC(C)(C)C1=CC(=NO1)NC(=O)N(C)C		211.132	0	15	0	0	0	0	0	1	3	1 5 255	1 3 8 1 7 8 11 12 8 3 12 8 7 11 8	FALSE	0	C:\Users\qiang\Documents\Schrodinger\glide-dock_XP_346	glide-dock_XP_346_pv.maegz	1
5280682	1934	Structure2D_COMPOUND_CID_5280682.1	5280682	1	532	7	2	4	AAADceB4OAAAAAAAAAAAAAAAAAAAAAAAAAAwYIAAAAAAAACBQAAAGgAACAAADASAmAIyBoAABgCIAqBSAAICCAAkIAAIiAFGiMgNJzaGNR6CeWOl4BULuQfI7LzOIAABCAAIQABAAAIQABCAAAAAAAAAAA==	5-hydroxy-2-(3-hydroxy-4-methoxy-phenyl)-3,7-dimethoxy-chromen-4-one	5-hydroxy-2-(3-hydroxy-4-methoxyphenyl)-3,7-dimethoxy-1-benzopyran-4-one	5-hydroxy-2-(3-hydroxy-4-methoxyphenyl)-3,7-dimethoxychromen-4-one	5-hydroxy-2-(3-hydroxy-4-methoxyphenyl)-3,7-dimethoxychromen-4-one	3,7-dimethoxy-2-(4-methoxy-3-oxidanyl-phenyl)-5-oxidanyl-chromen-4-one	5-hydroxy-2-(3-hydroxy-4-methoxy-phenyl)-3,7-dimethoxy-chromone	InChI=1S/C18H16O7/c1-22-10-7-12(20)15-14(8-10)25-17(18(24-3)16(15)21)9-4-5-13(23-2)11(19)6-9/h4-8,19-20H,1-3H3	KPCRYSMUMBNTCK-UHFFFAOYSA-N	3.100	344.090	C18H16O7	344.300	COC1=C(C=C(C=C1)C2=C(C(=O)C3=C(C=C(C=C3O2)OC)O)OC)O	COC1=C(C=C(C=C1)C2=C(C(=O)C3=C(C=C(C=C3O2)OC)O)OC)O		344.090	0	25	0	0	0	0	0	1	15	1 5 255	1 10 8 1 9 8 10 15 8 11 13 8 12 18 8 12 19 8 14 17 8 15 16 8 16 17 8 18 20 8 19 21 8 20 22 8 21 22 8 8 10 8 8 13 8 8 14 8 9 11 8	FALSE	0	C:\Users\qiang\Documents\Schrodinger\glide-dock_XP_346	glide-dock_XP_346_pv.maegz	1
6029	1935	Structure2D_COMPOUND_CID_6029.1	6029	1	371	6	4	2	AAADccBzOAAAAAAAAAAAAAAAAAAAASAAAAAgAAAAAAAAAAAAAAAAHgAQCAAACBThgAYBAAPABgCIACFWUACAAAAAAgAIAAAIAECDEAIAgAAOQAAPFyITAMDwMAIAAAAAAAAAAAAAAAAAAAAAAAAAAAAAAA==	1-[(2R,3R,4S,5R)-3,4-dihydroxy-5-(hydroxymethyl)tetrahydrofuran-2-yl]pyrimidine-2,4-dione	1-[(2R,3R,4S,5R)-3,4-dihydroxy-5-(hydroxymethyl)-2-oxolanyl]pyrimidine-2,4-dione	1-[(2<I>R</I>,3<I>R</I>,4<I>S</I>,5<I>R</I>)-3,4-dihydroxy-5-(hydroxymethyl)oxolan-2-yl]pyrimidine-2,4-dione	1-[(2R,3R,4S,5R)-3,4-dihydroxy-5-(hydroxymethyl)oxolan-2-yl]pyrimidine-2,4-dione	1-[(2R,3R,4S,5R)-5-(hydroxymethyl)-3,4-bis(oxidanyl)oxolan-2-yl]pyrimidine-2,4-dione	1-[(2R,3R,4S,5R)-3,4-dihydroxy-5-methylol-tetrahydrofuran-2-yl]pyrimidine-2,4-quinone	InChI=1S/C9H12N2O6/c12-3-4-6(14)7(15)8(17-4)11-2-1-5(13)10-9(11)16/h1-2,4,6-8,12,14-15H,3H2,(H,10,13,16)/t4-,6-,7-,8-/m1/s1	DRTQHJPVMGBUCF-XVFCMESISA-N		244.070	C9H12N2O6	244.200	C1=CN(C(=O)NC1=O)C2C(C(C(O2)CO)O)O	C1=CN(C(=O)NC1=O)[C@H]2[C@@H]([C@@H]([C@H](O2)CO)O)O	119	244.070	0	17	4	0	0	0	0	1	3	1 5 255	12 13 6 15 16 8 16 17 8 9 2 5 10 3 5 11 7 6 7 14 8 7 15 8 8 14 8 8 17 8	TRUE	0	C:\Users\qiang\Documents\Schrodinger\glide-dock_XP_346	glide-dock_XP_346_pv.maegz	1
9914412	1936	Structure2D_COMPOUND_CID_9914412.1	9914412	1	709	8	2	10	AAADceB7uAAAAAAAAAAAAAAAAAAAAAAAAAA8eMECAAAAAACx9AAAHgAQAAAADAzhngY39vfIFACoAydzdACCiCk1IqAJ2CE+7NiPLvLE/duHPSru1Bva6ae42BOOIECBAgACQABAgQIEAASAAAAAAAAAAA==	N-[4-[[6-methoxy-7-(3-morpholinopropoxy)quinazolin-4-yl]amino]phenyl]benzamide	N-[4-[[6-methoxy-7-[3-(4-morpholinyl)propoxy]-4-quinazolinyl]amino]phenyl]benzamide	<I>N</I>-[4-[[6-methoxy-7-(3-morpholin-4-ylpropoxy)quinazolin-4-yl]amino]phenyl]benzamide	N-[4-[[6-methoxy-7-(3-morpholin-4-ylpropoxy)quinazolin-4-yl]amino]phenyl]benzamide	N-[4-[[6-methoxy-7-(3-morpholin-4-ylpropoxy)quinazolin-4-yl]amino]phenyl]benzamide	N-[4-[[6-methoxy-7-(3-morpholinopropoxy)quinazolin-4-yl]amino]phenyl]benzamide	InChI=1S/C29H31N5O4/c1-36-26-18-24-25(19-27(26)38-15-5-12-34-13-16-37-17-14-34)30-20-31-28(24)32-22-8-10-23(11-9-22)33-29(35)21-6-3-2-4-7-21/h2-4,6-11,18-20H,5,12-17H2,1H3,(H,33,35)(H,30,31,32)	OGNYUTNQZVRGMN-UHFFFAOYSA-N	4.200	513.238	C29H31N5O4	513.600	COC1=C(C=C2C(=C1)C(=NC=N2)NC3=CC=C(C=C3)NC(=O)C4=CC=CC=C4)OCCCN5CCOCC5	COC1=C(C=C2C(=C1)C(=NC=N2)NC3=CC=C(C=C3)NC(=O)C4=CC=CC=C4)OCCCN5CCOCC5		513.238	0	38	0	0	0	0	0	1	6	1 5 255	17 18 8 17 19 8 18 22 8 19 21 8 20 21 8 20 22 8 20 23 8 24 26 8 24 27 8 26 30 8 27 31 8 28 30 8 28 31 8 33 34 8 33 35 8 34 36 8 35 37 8 36 38 8 37 38 8 7 21 8 7 25 8 8 23 8 8 25 8	FALSE	0	C:\Users\qiang\Documents\Schrodinger\glide-dock_XP_346	glide-dock_XP_346_pv.maegz	1
90479478	1937	PubChem_compound_text_Lauryl hydrogen sulfate_records.31	90479478	1	993	12	2	23	AAADcfB/vABgAAAAAAAAAAAAAAAAAAAAAAA8YIAAAAAAAAAB0AAAHgQQCAAADAjh2wY/uJdIFIioAjb3/DCCgCk1ALAJ2CE4TNiILrLgfViGNQgsxgPoqaeIyKCOAAAAAAAAAAAAAAAAAAAAAAAAAAAAAA==	[(Z)-4-[(4-amino-2-methyl-pyrimidin-5-yl)methyl-formyl-amino]-3-benzoylsulfanyl-pent-3-enyl] benzoate;dodecyl hydrogen sulfate	benzoic acid [(Z)-4-[(4-amino-2-methyl-5-pyrimidinyl)methyl-formylamino]-3-(benzoylthio)pent-3-enyl] ester;sulfuric acid dodecyl ester	[(<I>Z</I>)-4-[(4-amino-2-methylpyrimidin-5-yl)methyl-formylamino]-3-benzoylsulfanylpent-3-enyl] benzoate;dodecyl hydrogen sulfate	[(Z)-4-[(4-amino-2-methylpyrimidin-5-yl)methyl-formylamino]-3-benzoylsulfanylpent-3-enyl] benzoate;dodecyl hydrogen sulfate	[(Z)-4-[(4-azanyl-2-methyl-pyrimidin-5-yl)methyl-methanoyl-amino]-3-(phenylcarbonylsulfanyl)pent-3-enyl] benzoate;dodecyl hydrogen sulfate	benzoic acid [(Z)-4-[(4-amino-2-methyl-pyrimidin-5-yl)methyl-formyl-amino]-3-(benzoylthio)pent-3-enyl] ester;sulfuric acid lauryl ester	InChI=1S/C26H26N4O4S.C12H26O4S/c1-18(30(17-31)16-22-15-28-19(2)29-24(22)27)23(35-26(33)21-11-7-4-8-12-21)13-14-34-25(32)20-9-5-3-6-10-20;1-2-3-4-5-6-7-8-9-10-11-12-16-17(13,14)15/h3-12,15,17H,13-14,16H2,1-2H3,(H2,27,28,29);2-12H2,1H3,(H,13,14,15)/b23-18-;	OLTVHXMQBFXARO-XTMYEIJHSA-N		756.323	C38H52N4O8S2	757.000	CCCCCCCCCCCCOS(=O)(=O)O.CC1=NC=C(C(=N1)N)CN(C=O)C(=C(CCOC(=O)C2=CC=CC=C2)SC(=O)C3=CC=CC=C3)C	CCCCCCCCCCCCOS(=O)(=O)O.CC1=NC=C(C(=N1)N)CN(C=O)/C(=C(/CCOC(=O)C2=CC=CC=C2)\SC(=O)C3=CC=CC=C3)/C		756.323	0	52	0	0	1	0	0	2	3	1 5 255	12 34 8 12 37 8 13 36 8 13 37 8 31 34 8 31 36 8 39 43 8 39 44 8 42 45 8 42 46 8 43 47 8 44 48 8 45 50 8 46 51 8 47 49 8 48 49 8 50 52 8 51 52 8	FALSE	0	C:\Users\qiang\Documents\Schrodinger\glide-dock_XP_346	glide-dock_XP_346_pv.maegz	31
95549476	1938	Structure2D_COMPOUND_CID_95549476.1	95549476	1	703	7	3	8	AAADceB4OYAAAAAAAAAAAAAAAAAAAaIAAAAAAAAAAAASAAAAAAAAGwAACAAADRSggBICCAAABgDIECDSCAgACAAgIAAICAEAAAgAFBIAAQACUAAFwAAIEAPI4KwOgAAAAAAAAAAAAAAAAAAAAIQADAAAAA==	(5E)-5-[(3aR,4R,5R,6aS)-3,3-difluoro-5-hydroxy-4-[(E,3S,4S)-3-hydroxy-4-methyl-non-1-en-6-ynyl]-4,5,6,6a-tetrahydro-3aH-cyclopenta[b]furan-2-ylidene]pentanoic acid	(5E)-5-[(3aR,4R,5R,6aS)-3,3-difluoro-5-hydroxy-4-[(E,3S,4S)-3-hydroxy-4-methylnon-1-en-6-ynyl]-4,5,6,6a-tetrahydro-3aH-cyclopenta[b]furan-2-ylidene]pentanoic acid	(5<I>E</I>)-5-[(3<I>a</I><I>R</I>,4<I>R</I>,5<I>R</I>,6<I>a</I><I>S</I>)-3,3-difluoro-5-hydroxy-4-[(<I>E</I>,3<I>S</I>,4<I>S</I>)-3-hydroxy-4-methylnon-1-en-6-ynyl]-4,5,6,6<I>a</I>-tetrahydro-3<I>a</I><I>H</I>-cyclopenta[b]furan-2-ylidene]pentanoic acid	(5E)-5-[(3aR,4R,5R,6aS)-3,3-difluoro-5-hydroxy-4-[(E,3S,4S)-3-hydroxy-4-methylnon-1-en-6-ynyl]-4,5,6,6a-tetrahydro-3aH-cyclopenta[b]furan-2-ylidene]pentanoic acid	(5E)-5-[(3aR,4R,5R,6aS)-3,3-bis(fluoranyl)-4-[(E,3S,4S)-4-methyl-3-oxidanyl-non-1-en-6-ynyl]-5-oxidanyl-4,5,6,6a-tetrahydro-3aH-cyclopenta[b]furan-2-ylidene]pentanoic acid	(5E)-5-[(3aR,4R,5R,6aS)-3,3-difluoro-5-hydroxy-4-[(E,3S,4S)-3-hydroxy-4-methyl-non-1-en-6-ynyl]-4,5,6,6a-tetrahydro-3aH-cyclopenta[b]furan-2-ylidene]valeric acid	InChI=1S/C22H30F2O5/c1-3-4-5-8-14(2)16(25)12-11-15-17(26)13-18-21(15)22(23,24)19(29-18)9-6-7-10-20(27)28/h9,11-12,14-18,21,25-26H,3,6-8,10,13H2,1-2H3,(H,27,28)/b12-11+,19-9+/t14-,15-,16+,17+,18-,21+/m0/s1	PVHIRYQSPDZLLG-HBXWYSCUSA-N	3.100	412.206	C22H30F2O5	412.500	CCC#CCC(C)C(C=CC1C(CC2C1C(C(=CCCCC(=O)O)O2)(F)F)O)O	CCC#CC[C@H](C)[C@@H](/C=C/[C@H]1[C@@H](C[C@H]2[C@@H]1C(/C(=C\CCCC(=O)O)/O2)(F)F)O)O	87	412.206	0	29	6	0	2	0	0	1	-1	1 5 255	10 15 6 20 23 5 11 4 5 18 5 6 8 30 6 9 31 6	TRUE	0	C:\Users\qiang\Documents\Schrodinger\glide-dock_XP_346	glide-dock_XP_346_pv.maegz	1
11369918	1939	Structure2D_COMPOUND_CID_11369918.1	11369918	1	392	3	1	1	AAADceB7AABAAAAAAAAAAAAAAAAAAAAAAAA8YIAABAAAAAABQAAAHAQQAAAADAjBWAQxwYPAAAigAiZiZACCAAEgChAJiJwoZJgIYKKgmZGUIAhgkACoyAcQgAAOAAAAAAAEAQAAAAAAAAgCAAAAAAAAAA==	6-piperazin-1-ylbenzo[b][1,4]benzothiazepine	6-(1-piperazinyl)benzo[b][1,4]benzothiazepine	6-piperazin-1-ylbenzo[b][1,4]benzothiazepine	6-piperazin-1-ylbenzo[b][1,4]benzothiazepine	6-piperazin-1-ylbenzo[b][1,4]benzothiazepine	6-piperazinobenzo[b][1,4]benzothiazepine	InChI=1S/C17H17N3S/c1-3-7-15-13(5-1)17(20-11-9-18-10-12-20)19-14-6-2-4-8-16(14)21-15/h1-8,18H,9-12H2	JLOAJISUHPIQOX-UHFFFAOYSA-N	2.500	295.114	C17H17N3S	295.400	C1CN(CCN1)C2=NC3=CC=CC=C3SC4=CC=CC=C42	C1CN(CCN1)C2=NC3=CC=CC=C3SC4=CC=CC=C42		295.114	0	21	0	0	0	0	0	1	-1	1 5 255	10 11 8 10 13 8 11 15 8 12 14 8 12 17 8 13 16 8 14 19 8 15 18 8 16 18 8 17 20 8 19 21 8 20 21 8	FALSE	0	C:\Users\qiang\Documents\Schrodinger\glide-dock_XP_346	glide-dock_XP_346_pv.maegz	1
42608142	1940	Structure2D_COMPOUND_CID_42608142 (1).1	42608142	1	366	4	2	3	AAADceB4OAAAAAAAAAAAAAAAAAAAAAAAAAAwYAAAAAAAAADBAAAAGgAACAAADVSgmAIyAIAABgCIAqBSAAICAAAkAAAIiAFACMgINjKANRiAcQAlwAEIqQeK6PyOwAACAAAQAADAAAYAADAAAAAAAAAAAA==	(2R,3S)-2-hydroxy-3-(1-hydroxy-1-methyl-ethyl)-8-(methoxymethyl)-5-methyl-tetralin-1-one	(2R,3S)-2-hydroxy-3-(2-hydroxypropan-2-yl)-8-(methoxymethyl)-5-methyl-3,4-dihydro-2H-naphthalen-1-one	(2<I>R</I>,3<I>S</I>)-2-hydroxy-3-(2-hydroxypropan-2-yl)-8-(methoxymethyl)-5-methyl-3,4-dihydro-2<I>H</I>-naphthalen-1-one	(2R,3S)-2-hydroxy-3-(2-hydroxypropan-2-yl)-8-(methoxymethyl)-5-methyl-3,4-dihydro-2H-naphthalen-1-one	(2R,3S)-8-(methoxymethyl)-5-methyl-2-oxidanyl-3-(2-oxidanylpropan-2-yl)-3,4-dihydro-2H-naphthalen-1-one	(2R,3S)-2-hydroxy-3-(1-hydroxy-1-methyl-ethyl)-8-(methoxymethyl)-5-methyl-tetralin-1-one	InChI=1S/C16H22O4/c1-9-5-6-10(8-20-4)13-11(9)7-12(16(2,3)19)14(17)15(13)18/h5-6,12,14,17,19H,7-8H2,1-4H3/t12-,14+/m0/s1	GRTATZFIZSZURL-GXTWGEPZSA-N	1.900	278.152	C16H22O4	278.340	CC1=C2CC(C(C(=O)C2=C(C=C1)COC)O)C(C)(C)O	CC1=C2C[C@@H]([C@H](C(=O)C2=C(C=C1)COC)O)C(C)(C)O		278.152	0	20	2	0	0	0	0	1	-1	1 5 255	10 15 8 14 16 8 15 17 8 16 17 8 8 2 6 5 21 6 9 10 8 9 14 8	TRUE	0	C:\Users\qiang\Documents\Schrodinger\glide-dock_XP_346	glide-dock_XP_346_pv.maegz	1
42608142	1941	Structure2D_COMPOUND_CID_42608142.1	42608142	1	366	4	2	3	AAADceB4OAAAAAAAAAAAAAAAAAAAAAAAAAAwYAAAAAAAAADBAAAAGgAACAAADVSgmAIyAIAABgCIAqBSAAICAAAkAAAIiAFACMgINjKANRiAcQAlwAEIqQeK6PyOwAACAAAQAADAAAYAADAAAAAAAAAAAA==	(2R,3S)-2-hydroxy-3-(1-hydroxy-1-methyl-ethyl)-8-(methoxymethyl)-5-methyl-tetralin-1-one	(2R,3S)-2-hydroxy-3-(2-hydroxypropan-2-yl)-8-(methoxymethyl)-5-methyl-3,4-dihydro-2H-naphthalen-1-one	(2<I>R</I>,3<I>S</I>)-2-hydroxy-3-(2-hydroxypropan-2-yl)-8-(methoxymethyl)-5-methyl-3,4-dihydro-2<I>H</I>-naphthalen-1-one	(2R,3S)-2-hydroxy-3-(2-hydroxypropan-2-yl)-8-(methoxymethyl)-5-methyl-3,4-dihydro-2H-naphthalen-1-one	(2R,3S)-8-(methoxymethyl)-5-methyl-2-oxidanyl-3-(2-oxidanylpropan-2-yl)-3,4-dihydro-2H-naphthalen-1-one	(2R,3S)-2-hydroxy-3-(1-hydroxy-1-methyl-ethyl)-8-(methoxymethyl)-5-methyl-tetralin-1-one	InChI=1S/C16H22O4/c1-9-5-6-10(8-20-4)13-11(9)7-12(16(2,3)19)14(17)15(13)18/h5-6,12,14,17,19H,7-8H2,1-4H3/t12-,14+/m0/s1	GRTATZFIZSZURL-GXTWGEPZSA-N	1.900	278.152	C16H22O4	278.340	CC1=C2CC(C(C(=O)C2=C(C=C1)COC)O)C(C)(C)O	CC1=C2C[C@@H]([C@H](C(=O)C2=C(C=C1)COC)O)C(C)(C)O		278.152	0	20	2	0	0	0	0	1	-1	1 5 255	10 15 8 14 16 8 15 17 8 16 17 8 8 2 6 5 21 6 9 10 8 9 14 8	TRUE	0	C:\Users\qiang\Documents\Schrodinger\glide-dock_XP_346	glide-dock_XP_346_pv.maegz	1
5317559	1942	Structure2D_COMPOUND_CID_5317559.1	5317559	1	163	3	1	0	AAADccByMAAAAAAAAAAAAAAAAAAAAAAAAAAsSAAAAAAAAACxgAAAHgAACAAADAjxngc+iJIIFgCgAzRnRACCgCAxAiAI2CA4bJgYNmLAsZmGcAhmwAHM+AeQcAMOgAAAAAAAAAAAAAAAAAAAAAAAAAAAAA==	8-methyl-3,4-dihydro-1H-pyrano[3,4-c]pyridin-1-ol	8-methyl-3,4-dihydro-1H-pyrano[3,4-c]pyridin-1-ol	8-methyl-3,4-dihydro-1<I>H</I>-pyrano[3,4-c]pyridin-1-ol	8-methyl-3,4-dihydro-1H-pyrano[3,4-c]pyridin-1-ol	8-methyl-3,4-dihydro-1H-pyrano[3,4-c]pyridin-1-ol	8-methyl-3,4-dihydro-1H-pyrano[3,4-c]pyridin-1-ol	InChI=1S/C9H11NO2/c1-6-8-7(2-4-10-6)3-5-12-9(8)11/h2,4,9,11H,3,5H2,1H3	HCBOYQSYWSEVID-UHFFFAOYSA-N	0.400	165.079	C9H11NO2	165.190	CC1=NC=CC2=C1C(OCC2)O	CC1=NC=CC2=C1C(OCC2)O		165.079	0	12	0	1	0	0	0	1	-1	1 5 255	10 11 8 7 2 3 3 11 8 3 9 8 4 5 8 4 9 8 5 10 8	TRUE	0	C:\Users\qiang\Documents\Schrodinger\glide-dock_XP_346	glide-dock_XP_346_pv.maegz	1
235905	1943	Structure2D_COMPOUND_CID_235905.1	235905	1	492	1	1	2	AAADcfB4IAAAAAAAAAAAAAAAAAAAAYAAAAAwYIAAAAAAAGDAAAAAGgAACAAAD0SAgAACAAAAAgCAAiBCAAAAAAAgAAAICAAAAAgAAAIAAQAAQAAEwAAIAAOAwPAPgAAAAAAAAACAAAQAACAAAYAADAAAAA==	(8R,9S,10R,13S,14S,17R)-17-allyl-13-methyl-2,3,6,7,8,9,10,11,12,14,15,16-dodecahydro-1H-cyclopenta[a]phenanthren-17-ol	(8R,9S,10R,13S,14S,17R)-13-methyl-17-prop-2-enyl-2,3,6,7,8,9,10,11,12,14,15,16-dodecahydro-1H-cyclopenta[a]phenanthren-17-ol	(8<I>R</I>,9<I>S</I>,10<I>R</I>,13<I>S</I>,14<I>S</I>,17<I>R</I>)-13-methyl-17-prop-2-enyl-2,3,6,7,8,9,10,11,12,14,15,16-dodecahydro-1<I>H</I>-cyclopenta[a]phenanthren-17-ol	(8R,9S,10R,13S,14S,17R)-13-methyl-17-prop-2-enyl-2,3,6,7,8,9,10,11,12,14,15,16-dodecahydro-1H-cyclopenta[a]phenanthren-17-ol	(8R,9S,10R,13S,14S,17R)-13-methyl-17-prop-2-enyl-2,3,6,7,8,9,10,11,12,14,15,16-dodecahydro-1H-cyclopenta[a]phenanthren-17-ol	(8R,9S,10R,13S,14S,17R)-17-allyl-13-methyl-2,3,6,7,8,9,10,11,12,14,15,16-dodecahydro-1H-cyclopenta[a]phenanthren-17-ol	InChI=1S/C21H32O/c1-3-12-21(22)14-11-19-18-9-8-15-6-4-5-7-16(15)17(18)10-13-20(19,21)2/h3,6,16-19,22H,1,4-5,7-14H2,2H3/t16-,17+,18+,19-,20-,21-/m0/s1	ATXHVCQZZJYMCF-XUDSTZEESA-N	5.300	300.245	C21H32O	300.500	CC12CCC3C(C1CCC2(CC=C)O)CCC4=CCCCC34	C[C@]12CC[C@H]3[C@H]([C@@H]1CC[C@]2(CC=C)O)CCC4=CCCC[C@H]34		300.245	0	22	6	0	0	0	0	1	1	1 5 255	6 1 5 11 34 5 2 13 5 3 23 6 4 24 5 5 25 6	TRUE	0	C:\Users\qiang\Documents\Schrodinger\glide-dock_XP_346	glide-dock_XP_346_pv.maegz	1
15613266	1944	Structure2D_COMPOUND_CID_15613266.1	15613266	1	197	6	4	3	AAADceBwOAAAAAAAAAAAAAAAAAAAAAAAAAAkAAAAAAAAAAAAAAAAGgAACAAACBSwgAMCCAAABgAAAAAAAAAAAAAAAAAAAAAAAAAREAIAAAAiQAAFAAAHAAHAYAwAAAAAAAAAAAAAAAAAAAAAAAAAAAAAAA==	2-(hydroxymethyl)-6-isopropoxy-tetrahydropyran-3,4,5-triol	2-(hydroxymethyl)-6-propan-2-yloxyoxane-3,4,5-triol	2-(hydroxymethyl)-6-propan-2-yloxyoxane-3,4,5-triol	2-(hydroxymethyl)-6-propan-2-yloxyoxane-3,4,5-triol	2-(hydroxymethyl)-6-propan-2-yloxy-oxane-3,4,5-triol	2-isopropoxy-6-methylol-tetrahydropyran-3,4,5-triol	InChI=1S/C9H18O6/c1-4(2)14-9-8(13)7(12)6(11)5(3-10)15-9/h4-13H,3H2,1-2H3	UOEFDXYUEPHESS-UHFFFAOYSA-N		222.110	C9H18O6	222.240	CC(C)OC1C(C(C(C(O1)CO)O)O)O	CC(C)OC1C(C(C(C(O1)CO)O)O)O		222.110	0	15	0	5	0	0	0	1	-1	1 5 255	10 12 3 11 2 3 7 3 3 8 4 3 9 5 3	TRUE	0	C:\Users\qiang\Documents\Schrodinger\glide-dock_XP_346	glide-dock_XP_346_pv.maegz	1
159134	1945	Structure2D_COMPOUND_CID_159134.1	159134	1	1580	20	5	17	AAADcfB8PgAAAAAAAAAAAAAAAAAAAAAAAAA0aJECAAAAAACBQAAAGgAACAAADRSwmAMyDoAABgCIAiDSCAACCAAkIAAIiAEGiMgdNzaGNRqieWOl4BEPuYfK7DyOgAABAAAIQAAAAAIAABCAAAAAAAAAAA==	[(2R,3R,4S,5R,6S)-4-acetoxy-2-(acetoxymethyl)-6-[[(3S,4R,4aS)-8-oxo-4-vinyl-4,4a,5,6-tetrahydro-3H-pyrano[3,4-c]pyran-3-yl]oxy]-5-benzoyloxy-tetrahydropyran-3-yl] 2-hydroxy-3-[(2S,3R,4S,5S,6R)-3,4,5-trihydroxy-6-(hydroxymethyl)tetrahydropyran-2-yl]oxy-benzoate	2-hydroxy-3-[[(2S,3R,4S,5S,6R)-3,4,5-trihydroxy-6-(hydroxymethyl)-2-oxanyl]oxy]benzoic acid [(2R,3R,4S,5R,6S)-4-acetyloxy-2-(acetyloxymethyl)-6-[[(3S,4R,4aS)-4-ethenyl-8-oxo-4,4a,5,6-tetrahydro-3H-pyrano[3,4-c]pyran-3-yl]oxy]-5-benzoyloxy-3-oxanyl] ester	[(2<I>R</I>,3<I>R</I>,4<I>S</I>,5<I>R</I>,6<I>S</I>)-4-acetyloxy-2-(acetyloxymethyl)-6-[[(3<I>S</I>,4<I>R</I>,4<I>a</I><I>S</I>)-4-ethenyl-8-oxo-4,4<I>a</I>,5,6-tetrahydro-3<I>H</I>-pyrano[3,4-c]pyran-3-yl]oxy]-5-benzoyloxyoxan-3-yl] 2-hydroxy-3-[(2<I>S</I>,3<I>R</I>,4<I>S</I>,5<I>S</I>,6<I>R</I>)-3,4,5-trihydroxy-6-(hydroxymethyl)oxan-2-yl]oxybenzoate	[(2R,3R,4S,5R,6S)-4-acetyloxy-2-(acetyloxymethyl)-6-[[(3S,4R,4aS)-4-ethenyl-8-oxo-4,4a,5,6-tetrahydro-3H-pyrano[3,4-c]pyran-3-yl]oxy]-5-benzoyloxyoxan-3-yl] 2-hydroxy-3-[(2S,3R,4S,5S,6R)-3,4,5-trihydroxy-6-(hydroxymethyl)oxan-2-yl]oxybenzoate	[(2R,3R,4S,5R,6S)-4-acetyloxy-2-(acetyloxymethyl)-6-[[(3S,4R,4aS)-4-ethenyl-8-oxidanylidene-4,4a,5,6-tetrahydro-3H-pyrano[3,4-c]pyran-3-yl]oxy]-5-(phenylcarbonyloxy)oxan-3-yl] 3-[(2S,3R,4S,5S,6R)-6-(hydroxymethyl)-3,4,5-tris(oxidanyl)oxan-2-yl]oxy-2-oxidanyl-benzoate	2-hydroxy-3-[(2S,3R,4S,5S,6R)-3,4,5-trihydroxy-6-methylol-tetrahydropyran-2-yl]oxy-benzoic acid [(2R,3R,4S,5R,6S)-4-acetoxy-2-(acetoxymethyl)-6-[[(3S,4R,4aS)-8-keto-4-vinyl-4,4a,5,6-tetrahydro-3H-pyrano[3,4-c]pyran-3-yl]oxy]-5-benzoyloxy-tetrahydropyran-3-yl] ester	InChI=1S/C40H44O20/c1-4-21-22-13-14-51-36(49)24(22)16-53-38(21)60-40-34(59-35(48)20-9-6-5-7-10-20)33(54-19(3)43)32(27(57-40)17-52-18(2)42)58-37(50)23-11-8-12-25(28(23)44)55-39-31(47)30(46)29(45)26(15-41)56-39/h4-12,16,21-22,26-27,29-34,38-41,44-47H,1,13-15,17H2,2-3H3/t21-,22+,26-,27-,29-,30+,31-,32-,33+,34-,38+,39-,40+/m1/s1	SABFJVXXJPRXKP-CFWZQYDDSA-N	2.200	844.243	C40H44O20	844.800	CC(=O)OCC1C(C(C(C(O1)OC2C(C3CCOC(=O)C3=CO2)C=C)OC(=O)C4=CC=CC=C4)OC(=O)C)OC(=O)C5=C(C(=CC=C5)OC6C(C(C(C(O6)CO)O)O)O)O	CC(=O)OC[C@@H]1[C@H]([C@@H]([C@H]([C@@H](O1)O[C@H]2[C@@H]([C@@H]3CCOC(=O)C3=CO2)C=C)OC(=O)C4=CC=CC=C4)OC(=O)C)OC(=O)C5=C(C(=CC=C5)O[C@H]6[C@@H]([C@H]([C@@H]([C@H](O6)CO)O)O)O)O	279	844.243	0	60	13	0	0	0	0	1	4	1 5 255	40 10 5 36 12 5 37 13 6 38 14 6 24 2 5 28 2 6 25 65 6 26 33 5 27 31 5 39 45 5 21 4 5 46 50 8 46 52 8 47 55 8 47 56 8 48 50 8 48 53 8 22 5 6 52 54 8 53 54 8 55 58 8 56 59 8 58 60 8 59 60 8 23 6 6	TRUE	0	C:\Users\qiang\Documents\Schrodinger\glide-dock_XP_346	glide-dock_XP_346_pv.maegz	1
13650	1946	Structure2D_COMPOUND_CID_13650.1	13650	1	232	3	1	0	AAADcYBwMAAAAAAAAAAAAAAAAAAAAAAAAAAwQAAAAAAAAACBAAAAGgAACAAADASAmAAwDoAABgCIAiDSCAICCAAgIAAIiABGCMgNJiKEMRqCOiCkwBELqYeAwCAOAAAAAAAIAAAAAAAAABAAAAAAAAAAAA==	3-hydroxychromen-2-one	3-hydroxy-1-benzopyran-2-one	3-hydroxychromen-2-one	3-hydroxychromen-2-one	3-oxidanylchromen-2-one	3-hydroxycoumarin	InChI=1S/C9H6O3/c10-7-5-6-3-1-2-4-8(6)12-9(7)11/h1-5,10H	MJKVTPMWOKAVMS-UHFFFAOYSA-N	1.800	162.032	C9H6O3	162.140	C1=CC=C2C(=C1)C=C(C(=O)O2)O	C1=CC=C2C(=C1)C=C(C(=O)O2)O		162.032	0	12	0	0	0	0	0	1	-1	1 5 255	1 12 8 1 5 8 10 11 8 4 5 8 4 6 8 4 7 8 5 8 8 6 9 8 7 10 8 8 11 8 9 12 8	FALSE	0	C:\Users\qiang\Documents\Schrodinger\glide-dock_XP_346	glide-dock_XP_346_pv.maegz	1
7407	1947	Structure2D_COMPOUND_CID_7407.1	7407	1		0	0	1	AAADccBwAAAAAAAAAAAAAAAAAAAAAAAAAAAwAAAAAAAAAAABAAAAGAAAAAAADACAGAAyAIAAAACAAiBCAAACAAAgAAAIiAAAAIgIICKAERCAIAAggAAIiAcAgIAOAAAAAAAAAAAAAAAAAAAAAAAAAAAAAA==	isopropenylbenzene	1-methylethenylbenzene	prop-1-en-2-ylbenzene	prop-1-en-2-ylbenzene	prop-1-en-2-ylbenzene	isopropenylbenzene	InChI=1S/C9H10/c1-8(2)9-6-4-3-5-7-9/h3-7H,1H2,2H3	XYLMUPLGERFSHI-UHFFFAOYSA-N		118.078	C9H10	118.180	CC(=C)C1=CC=CC=C1	CC(=C)C1=CC=CC=C1	0	118.078	0	9	0	0	0	0	0	1	1	1 5 255	1 3 8 1 4 8 3 5 8 4 6 8 5 8 8 6 8 8	FALSE	0	C:\Users\qiang\Documents\Schrodinger\glide-dock_XP_346	glide-dock_XP_346_pv.maegz	1
82100931	1948	Structure2D_COMPOUND_CID_82100931.1	82100931	1	232	4	1	5	AAADceByMAAAAAAAAAAAAAAAAAAAAAAAAAAwAAAAAAAAAAABAAAAHgAQAAAADCzBmAYyBoLABACIAqBSAAACCAAkIAAIiIGOiMgNJjKEtTuEMSIk0BEKqYea3LPOIAABAAAAQABAAAIAAACAAAAAAAAAAA==	1-(3,4-dimethoxyphenyl)-2-(methylamino)propan-1-one	1-(3,4-dimethoxyphenyl)-2-(methylamino)-1-propanone	1-(3,4-dimethoxyphenyl)-2-(methylamino)propan-1-one	1-(3,4-dimethoxyphenyl)-2-(methylamino)propan-1-one	1-(3,4-dimethoxyphenyl)-2-(methylamino)propan-1-one	1-(3,4-dimethoxyphenyl)-2-(methylamino)propan-1-one	InChI=1S/C12H17NO3/c1-8(13-2)12(14)9-5-6-10(15-3)11(7-9)16-4/h5-8,13H,1-4H3	VFOPXGBJCFJIFX-UHFFFAOYSA-N	1.600	223.121	C12H17NO3	223.270	CC(C(=O)C1=CC(=C(C=C1)OC)OC)NC	CC(C(=O)C1=CC(=C(C=C1)OC)OC)NC		223.121	0	16	0	1	0	0	0	1	-1	1 5 255	10 13 8 11 12 8 12 13 8 5 8 3 7 10 8 7 9 8 9 11 8	TRUE	0	C:\Users\qiang\Documents\Schrodinger\glide-dock_XP_346	glide-dock_XP_346_pv.maegz	1
12305725	1949	Structure2D_COMPOUND_CID_12305725.1	12305725	1	844	3	3	1	AAADcfB4MAAAAAAAAAAAAAAAAAAAAAAAAAAwYMGCAAAAAADAAAAAGgAACAAADxSggAICAAAAAgCAAiBCAAAAAAAgAAAACAAAAAgAEAIAAQAAQAAFgAAIAAOAwPAPgAAAAAAAAADAAAYAADAAAAAAAAAAAA==	(3S,4aR,6aR,6bS,8S,8aS,12aS,14aR,14bR)-8a-(hydroxymethyl)-4,4,6a,6b,11,11,14b-heptamethyl-1,2,3,4a,5,6,7,8,9,10,12,12a,14,14a-tetradecahydropicene-3,8-diol	(3S,4aR,6aR,6bS,8S,8aS,12aS,14aR,14bR)-8a-(hydroxymethyl)-4,4,6a,6b,11,11,14b-heptamethyl-1,2,3,4a,5,6,7,8,9,10,12,12a,14,14a-tetradecahydropicene-3,8-diol	(3<I>S</I>,4<I>a</I><I>R</I>,6<I>a</I><I>R</I>,6<I>b</I><I>S</I>,8<I>S</I>,8<I>a</I><I>S</I>,12<I>a</I><I>S</I>,14<I>a</I><I>R</I>,14<I>b</I><I>R</I>)-8<I>a</I>-(hydroxymethyl)-4,4,6<I>a</I>,6<I>b</I>,11,11,14<I>b</I>-heptamethyl-1,2,3,4<I>a</I>,5,6,7,8,9,10,12,12<I>a</I>,14,14<I>a</I>-tetradecahydropicene-3,8-diol	(3S,4aR,6aR,6bS,8S,8aS,12aS,14aR,14bR)-8a-(hydroxymethyl)-4,4,6a,6b,11,11,14b-heptamethyl-1,2,3,4a,5,6,7,8,9,10,12,12a,14,14a-tetradecahydropicene-3,8-diol	(3S,4aR,6aR,6bS,8S,8aS,12aS,14aR,14bR)-8a-(hydroxymethyl)-4,4,6a,6b,11,11,14b-heptamethyl-1,2,3,4a,5,6,7,8,9,10,12,12a,14,14a-tetradecahydropicene-3,8-diol	(3S,4aR,6aR,6bS,8S,8aS,12aS,14aR,14bR)-4,4,6a,6b,11,11,14b-heptamethyl-8a-methylol-1,2,3,4a,5,6,7,8,9,10,12,12a,14,14a-tetradecahydropicene-3,8-diol	InChI=1S/C30H50O3/c1-25(2)14-15-30(18-31)20(16-25)19-8-9-22-27(5)12-11-23(32)26(3,4)21(27)10-13-28(22,6)29(19,7)17-24(30)33/h8,20-24,31-33H,9-18H2,1-7H3/t20-,21-,22+,23-,24-,27-,28+,29+,30+/m0/s1	YHGVYECWZWIVJC-MZGFOBBZSA-N		458.376	C30H50O3	458.700	CC1(CCC2(C(C1)C3=CCC4C5(CCC(C(C5CCC4(C3(CC2O)C)C)(C)C)O)C)CO)C	C[C@]12CC[C@@H](C([C@@H]1CC[C@@]3([C@@H]2CC=C4[C@]3(C[C@@H]([C@@]5([C@H]4CC(CC5)(C)C)CO)O)C)C)(C)C)O		458.376	0	33	9	0	0	0	0	1	-1	1 5 255	18 1 6 11 38 6 12 29 6 21 2 6 4 19 6 5 34 5 6 22 6 7 23 5 8 35 5	TRUE	0	C:\Users\qiang\Documents\Schrodinger\glide-dock_XP_346	glide-dock_XP_346_pv.maegz	1
85355631	1950	PubChem_substance_text_Polyporusterone B_records.35																								0									1 3	7 1 6 10 22 5 16 36 5 17 27 6 24 2 5 29 31 5 25 3 5 26 5 5 6 18 5 8 34 6 9 35 6	TRUE	0	C:\Users\qiang\Documents\Schrodinger\glide-dock_XP_346	glide-dock_XP_346_pv.maegz	35	0	85355631	3	ChEBI	CHEBI:156164	Polyporusterone F (2S,3R,5R,9R,10R,13R,14S,17R)-2,3,14-trihydroxy-17-[(2S,3R,5S)-3-hydroxy-5,6-dimethylheptan-2-yl]-10,13-dimethyl-2,3,4,5,9,11,12,15,16,17-decahydro-1H-cyclopenta[a]phenanthren-6-one CHEBI:156164	CHEBI:156164	http://www.ebi.ac.uk/chebi/
7254	1951	Structure2D_COMPOUND_CID_7254.1	7254	1		0	0	0	AAADcYBgAAAGAAAAAAAAAAAAAAAAAAAAAAAwAAAAAAAAAAABAAAAGAIAAAAADAKAGCAyAIAAAACAAiBCAAACAAAgBQAIiAAAAogIICKBExCAIAAggAAIiAcAgAAOBAAAAACBAAAIAAAAAQIAAAAAAAAAAA==	2,4-dichloro-1-methyl-benzene	2,4-dichloro-1-methylbenzene	2,4-dichloro-1-methylbenzene	2,4-dichloro-1-methylbenzene	2,4-bis(chloranyl)-1-methyl-benzene	2,4-dichloro-1-methyl-benzene	InChI=1S/C7H6Cl2/c1-5-2-3-6(8)4-7(5)9/h2-4H,1H3	FUNUTBJJKQIVSY-UHFFFAOYSA-N		159.985	C7H6Cl2	161.030	CC1=C(C=C(C=C1)Cl)Cl	CC1=C(C=C(C=C1)Cl)Cl	0	159.985	0	9	0	0	0	0	0	1	1	1 5 255	3 4 8 3 5 8 4 7 8 5 8 8 7 9 8 8 9 8	FALSE	0	C:\Users\qiang\Documents\Schrodinger\glide-dock_XP_346	glide-dock_XP_346_pv.maegz	1
14704626	1952	Structure2D_COMPOUND_CID_14704626 (1).1	14704626	1		4	0	4	AAADccBgIABgAAAAAAAAAAAAAAAAAAAAAAAAAAAAAAAAAAAAAAAAGAQAAAAACACEQACCAAAAAAoAAAAAAEBAAQAAABAAAAAAAAAAAAAgAAAAAAAAAAAAAAAAAAAAAAAAAAAAAAAAAAAAAAAAAAAAAAAAAA==	1-(methyldisulfanyl)-1-methylsulfinyl-propane	1-(methyldisulfanyl)-1-methylsulfinylpropane	1-(methyldisulfanyl)-1-methylsulfinylpropane	1-(methyldisulfanyl)-1-methylsulfinylpropane	1-(methyldisulfanyl)-1-methylsulfinyl-propane	1-(methyldisulfanyl)-1-methylsulfinyl-propane	InChI=1S/C5H12OS3/c1-4-5(8-7-2)9(3)6/h5H,4H2,1-3H3	BBBAHSPHKVIDRN-UHFFFAOYSA-N		184.005	C5H12OS3	184.400	CCC(SSC)S(=O)C	CCC(SSC)S(=O)C		184.005	0	9	0	2	0	0	0	1	-1	1 5 255	1 8 3 5 6 3	TRUE	0	C:\Users\qiang\Documents\Schrodinger\glide-dock_XP_346	glide-dock_XP_346_pv.maegz	1
14704626	1953	Structure2D_COMPOUND_CID_14704626.1	14704626	1		4	0	4	AAADccBgIABgAAAAAAAAAAAAAAAAAAAAAAAAAAAAAAAAAAAAAAAAGAQAAAAACACEQACCAAAAAAoAAAAAAEBAAQAAABAAAAAAAAAAAAAgAAAAAAAAAAAAAAAAAAAAAAAAAAAAAAAAAAAAAAAAAAAAAAAAAA==	1-(methyldisulfanyl)-1-methylsulfinyl-propane	1-(methyldisulfanyl)-1-methylsulfinylpropane	1-(methyldisulfanyl)-1-methylsulfinylpropane	1-(methyldisulfanyl)-1-methylsulfinylpropane	1-(methyldisulfanyl)-1-methylsulfinyl-propane	1-(methyldisulfanyl)-1-methylsulfinyl-propane	InChI=1S/C5H12OS3/c1-4-5(8-7-2)9(3)6/h5H,4H2,1-3H3	BBBAHSPHKVIDRN-UHFFFAOYSA-N		184.005	C5H12OS3	184.400	CCC(SSC)S(=O)C	CCC(SSC)S(=O)C		184.005	0	9	0	2	0	0	0	1	-1	1 5 255	1 8 3 5 6 3	TRUE	0	C:\Users\qiang\Documents\Schrodinger\glide-dock_XP_346	glide-dock_XP_346_pv.maegz	1
442088	1954	Structure2D_COMPOUND_CID_442088.1	442088	1	495	2	1	0	AAADceB7IAAAAAAAAAAAAAAAAAAAAWAAAAA8eIEAAAAAAFix9AAAHgAQAAAADAjBngQzwPPJkACoAyVyVACCgCAlAiAImSE4ZNiIYPrA1ZGUIYholwLIyecYiMCOgAAAAAACAAAAAAAAAAQAAAAAAAAAAA==	(1S)-21-methyl-3,13,21-triazapentacyclo[11.8.0.02,10.04,9.015,20]henicosa-2(10),4,6,8,15,17,19-heptaen-14-one	(1S)-21-methyl-3,13,21-triazapentacyclo[11.8.0.02,10.04,9.015,20]heneicosa-2(10),4,6,8,15,17,19-heptaen-14-one	(1<I>S</I>)-21-methyl-3,13,21-triazapentacyclo[11.8.0.0<SUP>2,10</SUP>.0<SUP>4,9</SUP>.0<SUP>15,20</SUP>]henicosa-2(10),4,6,8,15,17,19-heptaen-14-one	(1S)-21-methyl-3,13,21-triazapentacyclo[11.8.0.02,10.04,9.015,20]henicosa-2(10),4,6,8,15,17,19-heptaen-14-one	(1S)-21-methyl-3,13,21-triazapentacyclo[11.8.0.02,10.04,9.015,20]henicosa-2(10),4,6,8,15,17,19-heptaen-14-one	(13bS)-14-methyl-7,8,13,13b-tetrahydroquinazolino[2,3-a]beta-carbolin-5-one	InChI=1S/C19H17N3O/c1-21-16-9-5-3-7-14(16)19(23)22-11-10-13-12-6-2-4-8-15(12)20-17(13)18(21)22/h2-9,18,20H,10-11H2,1H3/t18-/m0/s1	TXDUTHBFYKGSAH-SFHVURJKSA-N	3.100	303.137	C19H17N3O	303.400	CN1C2C3=C(CCN2C(=O)C4=CC=CC=C41)C5=CC=CC=C5N3	CN1[C@@H]2C3=C(CCN2C(=O)C4=CC=CC=C41)C5=CC=CC=C5N3		303.137	0	23	1	0	0	0	0	1	-1	1 5 255	10 13 8 10 16 8 12 14 8 12 17 8 13 18 8 14 19 8 16 20 8 17 22 8 18 21 8 19 23 8 20 21 8 22 23 8 4 13 8 4 6 8 5 24 5 6 7 8 7 10 8	TRUE	0	C:\Users\qiang\Documents\Schrodinger\glide-dock_XP_346	glide-dock_XP_346_pv.maegz	1
704473	1955	Structure2D_COMPOUND_CID_704473.1	704473	1	281	4	1	3	AAADccBzAABAAAAAAAAAAAAAAAAAAWAAAAA8QAAAAAAAAAAB8AAAHAQQAAAADAjFXgS/0ZLIEAikAzRnZACC8KlxCjkJ2DQ4ZJiIIOLgmZGEIAhokALIyCcQgAAOAAAAQAAAAAAAAACAAAAAAAAAAAAAAA==	N-(m-tolyl)-4-(4-pyridyl)thiazol-2-amine	N-(3-methylphenyl)-4-pyridin-4-yl-2-thiazolamine	<I>N</I>-(3-methylphenyl)-4-pyridin-4-yl-1,3-thiazol-2-amine	N-(3-methylphenyl)-4-pyridin-4-yl-1,3-thiazol-2-amine	N-(3-methylphenyl)-4-pyridin-4-yl-1,3-thiazol-2-amine	m-tolyl-[4-(4-pyridyl)thiazol-2-yl]amine	InChI=1S/C15H13N3S/c1-11-3-2-4-13(9-11)17-15-18-14(10-19-15)12-5-7-16-8-6-12/h2-10H,1H3,(H,17,18)	KATNUHQNJGNLPW-UHFFFAOYSA-N	3.800	267.083	C15H13N3S	267.400	CC1=CC(=CC=C1)NC2=NC(=CS2)C3=CC=NC=C3	CC1=CC(=CC=C1)NC2=NC(=CS2)C3=CC=NC=C3	66	267.083	0	19	0	0	0	0	0	1	-1	1 5 255	1 14 8 1 9 8 10 16 8 10 17 8 11 13 8 12 13 8 16 18 8 17 19 8 3 8 8 3 9 8 4 18 8 4 19 8 5 11 8 5 7 8 6 12 8 6 7 8 8 14 8	FALSE	0	C:\Users\qiang\Documents\Schrodinger\glide-dock_XP_346	glide-dock_XP_346_pv.maegz	1
9914412	1956	Structure2D_COMPOUND_CID_9914412.1	9914412	1	709	8	2	10	AAADceB7uAAAAAAAAAAAAAAAAAAAAAAAAAA8eMECAAAAAACx9AAAHgAQAAAADAzhngY39vfIFACoAydzdACCiCk1IqAJ2CE+7NiPLvLE/duHPSru1Bva6ae42BOOIECBAgACQABAgQIEAASAAAAAAAAAAA==	N-[4-[[6-methoxy-7-(3-morpholinopropoxy)quinazolin-4-yl]amino]phenyl]benzamide	N-[4-[[6-methoxy-7-[3-(4-morpholinyl)propoxy]-4-quinazolinyl]amino]phenyl]benzamide	<I>N</I>-[4-[[6-methoxy-7-(3-morpholin-4-ylpropoxy)quinazolin-4-yl]amino]phenyl]benzamide	N-[4-[[6-methoxy-7-(3-morpholin-4-ylpropoxy)quinazolin-4-yl]amino]phenyl]benzamide	N-[4-[[6-methoxy-7-(3-morpholin-4-ylpropoxy)quinazolin-4-yl]amino]phenyl]benzamide	N-[4-[[6-methoxy-7-(3-morpholinopropoxy)quinazolin-4-yl]amino]phenyl]benzamide	InChI=1S/C29H31N5O4/c1-36-26-18-24-25(19-27(26)38-15-5-12-34-13-16-37-17-14-34)30-20-31-28(24)32-22-8-10-23(11-9-22)33-29(35)21-6-3-2-4-7-21/h2-4,6-11,18-20H,5,12-17H2,1H3,(H,33,35)(H,30,31,32)	OGNYUTNQZVRGMN-UHFFFAOYSA-N	4.200	513.238	C29H31N5O4	513.600	COC1=C(C=C2C(=C1)C(=NC=N2)NC3=CC=C(C=C3)NC(=O)C4=CC=CC=C4)OCCCN5CCOCC5	COC1=C(C=C2C(=C1)C(=NC=N2)NC3=CC=C(C=C3)NC(=O)C4=CC=CC=C4)OCCCN5CCOCC5		513.238	0	38	0	0	0	0	0	1	6	1 5 255	17 18 8 17 19 8 18 22 8 19 21 8 20 21 8 20 22 8 20 23 8 24 26 8 24 27 8 26 30 8 27 31 8 28 30 8 28 31 8 33 34 8 33 35 8 34 36 8 35 37 8 36 38 8 37 38 8 7 21 8 7 25 8 8 23 8 8 25 8	FALSE	0	C:\Users\qiang\Documents\Schrodinger\glide-dock_XP_346	glide-dock_XP_346_pv.maegz	1
441964	1957	Structure2D_COMPOUND_CID_441964.1	441964	1	352	2	0	3	AAADccB4MAAAAAAAAAAAAAAAAAAAAAAAAAAwYIAAAAAAAACBQAAAGgAAAAAADASAmAAwBoAABACIAqBSAAACCAAkIAAIiAEGCMgMJjaENRqCOWCk4BEIqYeIyKCOAAAAAAAIAAAAAAAAABAAAAAAAAAAAA==	2-(2-phenylethyl)chromen-4-one	2-(2-phenylethyl)-1-benzopyran-4-one	2-(2-phenylethyl)chromen-4-one	2-(2-phenylethyl)chromen-4-one	2-(2-phenylethyl)chromen-4-one	2-phenethylchromone	InChI=1S/C17H14O2/c18-16-12-14(11-10-13-6-2-1-3-7-13)19-17-9-5-4-8-15(16)17/h1-9,12H,10-11H2	VNZNWFQJBFLELF-UHFFFAOYSA-N		250.099	C17H14O2	250.290	C1=CC=C(C=C1)CCC2=CC(=O)C3=CC=CC=C3O2	C1=CC=C(C=C1)CCC2=CC(=O)C3=CC=CC=C3O2		250.099	0	19	0	0	0	0	0	1	3	1 5 255	1 5 8 1 8 8 11 17 8 12 18 8 13 15 8 14 16 8 15 16 8 17 19 8 18 19 8 5 9 8 6 11 8 6 12 8 7 10 8 7 13 8 7 8 8 8 14 8 9 10 8	FALSE	0	C:\Users\qiang\Documents\Schrodinger\glide-dock_XP_346	glide-dock_XP_346_pv.maegz	1
9579050	1958	Structure2D_COMPOUND_CID_9579050.1	9579050	1	476	8	0	4	AAADceBzuAAAAAAAAAAAAAAAAAAAAWJAAAAsAAAAAAAAAAABgAAAHgAMAAAACBThkAYwjIMQRECpALFzWwSSCAAsIgA6iAEubNoOJrKE9ZuPGSDkzhGY6Ya8AAAAAAAAAAAAAAAAAAAAAAAAAAAAAAAAAA==	(5S)-5-(morpholinomethyl)-3-[(E)-(5-nitro-2-furyl)methyleneamino]oxazolidin-2-one	(5S)-5-(4-morpholinylmethyl)-3-[(E)-(5-nitro-2-furanyl)methylideneamino]-2-oxazolidinone	(5<I>S</I>)-5-(morpholin-4-ylmethyl)-3-[(<I>E</I>)-(5-nitrofuran-2-yl)methylideneamino]-1,3-oxazolidin-2-one	(5S)-5-(morpholin-4-ylmethyl)-3-[(E)-(5-nitrofuran-2-yl)methylideneamino]-1,3-oxazolidin-2-one	(5S)-5-(morpholin-4-ylmethyl)-3-[(E)-(5-nitrofuran-2-yl)methylideneamino]-1,3-oxazolidin-2-one	(5S)-5-(morpholinomethyl)-3-[(E)-(5-nitro-2-furyl)methyleneamino]oxazolidin-2-one	InChI=1S/C13H16N4O6/c18-13-16(14-7-10-1-2-12(22-10)17(19)20)9-11(23-13)8-15-3-5-21-6-4-15/h1-2,7,11H,3-6,8-9H2/b14-7+/t11-/m0/s1	YVQVOQKFMFRVGR-NGPAHMQLSA-N	0.800	324.107	C13H16N4O6	324.290	C1COCCN1CC2CN(C(=O)O2)N=CC3=CC=C(O3)[N+](=O)[O-]	C1COCCN1C[C@H]2CN(C(=O)O2)/N=C/C3=CC=C(O3)[N+](=O)[O-]	113	324.107	0	23	1	0	1	0	0	1	1	1 5 255	12 11 5 20 21 8 21 22 8 22 23 8 4 20 8 4 23 8	TRUE	0	C:\Users\qiang\Documents\Schrodinger\glide-dock_XP_346	glide-dock_XP_346_pv.maegz	1
337776	1959	Structure2D_COMPOUND_CID_337776.1	337776	1	484	5	0	0	AAADccB4OAAAAAAAAAAAAAAAAAAAASJEgAA0YIAAAAAAAEiR9AAAGgAAAAAADRSgmAMwDsAABECIAqhSgAACCAAkIAAIiAEGiMgdJzaENRqiOWKl4BUOqYfI7PzOoQADCAAIQABCAAYQABCAAAAAAAAAAA==	(1R,13R)-7,11,17,19,23-pentaoxahexacyclo[11.10.0.02,10.04,8.014,22.016,20]tricosa-2(10),3,5,8,14,16(20),21-heptaene	(1R,13R)-7,11,17,19,23-pentaoxahexacyclo[11.10.0.02,10.04,8.014,22.016,20]tricosa-2(10),3,5,8,14,16(20),21-heptaene	(1<I>R</I>,13<I>R</I>)-7,11,17,19,23-pentaoxahexacyclo[11.10.0.0<SUP>2,10</SUP>.0<SUP>4,8</SUP>.0<SUP>14,22</SUP>.0<SUP>16,20</SUP>]tricosa-2(10),3,5,8,14,16(20),21-heptaene	(1R,13R)-7,11,17,19,23-pentaoxahexacyclo[11.10.0.02,10.04,8.014,22.016,20]tricosa-2(10),3,5,8,14,16(20),21-heptaene	(1R,13R)-7,11,17,19,23-pentaoxahexacyclo[11.10.0.02,10.04,8.014,22.016,20]tricosa-2(10),3,5,8,14,16(20),21-heptaene	(1R,13R)-7,11,17,19,23-pentaoxahexacyclo[11.10.0.02,10.04,8.014,22.016,20]tricosa-2(10),3,5,8,14,16(20),21-heptaene	InChI=1S/C18H12O5/c1-2-19-13-5-14-11(3-9(1)13)18-12(7-20-14)10-4-16-17(22-8-21-16)6-15(10)23-18/h1-6,12,18H,7-8H2/t12-,18-/m0/s1	VZDPNKZCXYBWLM-SGTLLEGYSA-N	3.200	308.068	C18H12O5	308.300	C1C2C(C3=C(O1)C=C4C(=C3)C=CO4)OC5=CC6=C(C=C25)OCO6	C1[C@@H]2[C@H](C3=C(O1)C=C4C(=C3)C=CO4)OC5=CC6=C(C=C25)OCO6		308.068	0	23	2	0	0	0	0	1	1	1 5 255	10 12 8 10 14 8 11 15 8 12 18 8 13 16 8 14 19 8 15 17 8 16 17 8 18 20 8 19 20 8 19 21 8 21 23 8 5 20 8 5 23 8 6 24 5 7 25 5 8 11 8 8 13 8	TRUE	0	C:\Users\qiang\Documents\Schrodinger\glide-dock_XP_346	glide-dock_XP_346_pv.maegz	1
441575	1960	Structure2D_COMPOUND_CID_441575.1	441575	1	127	2	0	0	AAADccBgMAAAAAAAAAAAAAAAAAAAAAAAAAAgAAAAAAAAAAAAAAAAGgAAAAAACBSggAICCAAABACIACDSCAAAAAAgAAAICAAAAEgABAAAIQACEAAAwAAIIYIAAAAAAAAAAAAAAAAAAAAAAAAAAAAAAAAAAA==	(2S)-2-methyl-2,3-dihydropyran-6-one	(2S)-2-methyl-2,3-dihydropyran-6-one	(2<I>S</I>)-2-methyl-2,3-dihydropyran-6-one	(2S)-2-methyl-2,3-dihydropyran-6-one	(2S)-2-methyl-2,3-dihydropyran-6-one	(2S)-2-methyl-2,3-dihydropyran-6-one	InChI=1S/C6H8O2/c1-5-3-2-4-6(7)8-5/h2,4-5H,3H2,1H3/t5-/m0/s1	DYNKRGCMLGUEMN-YFKPBYRVSA-N	1.100	112.052	C6H8O2	112.130	CC1CC=CC(=O)O1	C[C@H]1CC=CC(=O)O1		112.052	0	8	1	0	0	0	0	1	1	1 5 255	3 5 5	TRUE	0	C:\Users\qiang\Documents\Schrodinger\glide-dock_XP_346	glide-dock_XP_346_pv.maegz	1
5318562	1961	Structure2D_COMPOUND_CID_5318562.1	5318562	1	310	4	2	0	AAADccBwOAAAAAAAAAAAAAAAAAAAAAAAAAAwQAAAAAAAAACBAAAAGgAACAAADASAmAAyBoAABgCIAqBSAAACCAAkIAAAiAEGCMgMJzaGNRqCeWCl4BUIuQeI7OzOIAACCAAIAABAAAQQABAAAAAAAAAAAA==	5,7-dihydroxy-2,8-dimethyl-chromen-4-one	5,7-dihydroxy-2,8-dimethyl-1-benzopyran-4-one	5,7-dihydroxy-2,8-dimethylchromen-4-one	5,7-dihydroxy-2,8-dimethylchromen-4-one	2,8-dimethyl-5,7-bis(oxidanyl)chromen-4-one	5,7-dihydroxy-2,8-dimethyl-chromone	InChI=1S/C11H10O4/c1-5-3-8(13)10-9(14)4-7(12)6(2)11(10)15-5/h3-4,12,14H,1-2H3	XSSGQRFNGHRFBC-UHFFFAOYSA-N	2.100	206.058	C11H10O4	206.190	CC1=CC(=O)C2=C(C=C(C(=C2O1)C)O)O	CC1=CC(=O)C2=C(C=C(C(=C2O1)C)O)O		206.058	0	15	0	0	0	0	0	1	-1	1 5 255	1 12 8 1 5 8 10 13 8 12 13 8 5 6 8 5 7 8 6 10 8 6 8 8 7 9 8 8 11 8 9 11 8	FALSE	0	C:\Users\qiang\Documents\Schrodinger\glide-dock_XP_346	glide-dock_XP_346_pv.maegz	1
108	1962	Structure2D_COMPOUND_CID_108.1	108	1	125	3	1	2	AAADcYBiMAAAAAAAAAAAAAAAAAAAAAAAAAAsAAAAAAAAAAABgAAAHgAACAAADADBmgQ8iJIIEgCoAjD3TACCgCAxAiAI2CE4ZJgIIPLAlZGEYAhkwAHIyAe8SAAOAAAAAAAAAAAAAAAAAAAAAAAAAAAAAA==	2-(3-pyridyl)acetic acid	2-(3-pyridinyl)acetic acid	2-pyridin-3-ylacetic acid	2-pyridin-3-ylacetic acid	2-pyridin-3-ylethanoic acid	2-(3-pyridyl)acetic acid	InChI=1S/C7H7NO2/c9-7(10)4-6-2-1-3-8-5-6/h1-3,5H,4H2,(H,9,10)	WGNUNYPERJMVRM-UHFFFAOYSA-N		137.048	C7H7NO2	137.140	C1=CC(=CN=C1)CC(=O)O	C1=CC(=CN=C1)CC(=O)O		137.048	0	10	0	0	0	0	0	1	-1	1 5 255	3 10 8 3 7 8 4 6 8 4 7 8 6 8 8 8 10 8	FALSE	0	C:\Users\qiang\Documents\Schrodinger\glide-dock_XP_346	glide-dock_XP_346_pv.maegz	1
3366	1963	Structure2D_COMPOUND_CID_3366.1	3366	1	208	3	2	0	AAADcYBjIQAAAAAAAAAAAAAAAAAAAAAAAAAgAAAAAAAAAAAAAAAAHwAQAAAACADBAAQBAALAAACoABBhVAAAAAAAAAAAAAAAABCAAAAAAAAAAAAAAQAAAAAAAAAAAAAAAAAAAAAAAAAAAAAAAAAAAAAAAA==	6-amino-5-fluoro-1H-pyrimidin-2-one	6-amino-5-fluoro-1H-pyrimidin-2-one	6-amino-5-fluoro-1<I>H</I>-pyrimidin-2-one	6-amino-5-fluoro-1H-pyrimidin-2-one	6-azanyl-5-fluoranyl-1H-pyrimidin-2-one	6-amino-5-fluoro-1H-pyrimidin-2-one	InChI=1S/C4H4FN3O/c5-2-1-7-4(9)8-3(2)6/h1H,(H3,6,7,8,9)	XRECTZIEBJDKEO-UHFFFAOYSA-N	-0.900	129.034	C4H4FN3O	129.090	C1=NC(=O)NC(=C1F)N	C1=NC(=O)NC(=C1F)N		129.034	0	9	0	0	0	0	0	1	9	1 5 255	3 6 8 3 8 8 5 8 8 5 9 8 6 7 8 7 9 8	FALSE	0	C:\Users\qiang\Documents\Schrodinger\glide-dock_XP_346	glide-dock_XP_346_pv.maegz	1
16	1964	Structure2D_COMPOUND_CID_16.1	16	1	205	2	2	0	AAADceBzMAAAAAAAAAAAAAAAAAAAAAAAAAAAAAAAAAAAAAAAAAAAHgAQAAAACADBgAQAAALAAAAIAAEQEAAAAAAAAAAAAIEIAAAAABIAgAAEAAAAFgCAAAEYCAAAAAAAAAAAAAAAAAAAAAAAAAAAAAAAAA==	1,8-diazacyclotetradecane-2,9-dione	1,8-diazacyclotetradecane-2,9-dione	1,8-diazacyclotetradecane-2,9-dione	1,8-diazacyclotetradecane-2,9-dione	1,8-diazacyclotetradecane-2,9-dione	1,8-diazacyclotetradecane-2,9-quinone	InChI=1S/C12H22N2O2/c15-11-7-3-1-5-9-13-12(16)8-4-2-6-10-14-11/h1-10H2,(H,13,16)(H,14,15)	HERSSAVMHCMYSQ-UHFFFAOYSA-N	0.600	226.168	C12H22N2O2	226.320	C1CCC(=O)NCCCCCC(=O)NCC1	C1CCC(=O)NCCCCCC(=O)NCC1		226.168	0	16	0	0	0	0	0	1	6	1 5 255		FALSE	0	C:\Users\qiang\Documents\Schrodinger\glide-dock_XP_346	glide-dock_XP_346_pv.maegz	1
9907532	1965	Structure2D_COMPOUND_CID_9907532 (1).1	9907532	1	528	3	2	3	AAADceB7IQAEAAAAAAAAAAAAAAAAAWAAAAA8eLECAAAAAFgB/AAAHwAQAAAADQzhngYwxvPJlACgAyRiRACCiCAhIiAImSA+bJgMJuLEsZuGOCjm0BnI6AeQ0PMOoAAAAgACAABAAAAEAAQAAAAAAAAAAA==	2-(2-fluoro-2-quinuclidin-3-ylidene-ethoxy)-9H-carbazole;hydrochloride	2-[2-(1-azabicyclo[2.2.2]octan-3-ylidene)-2-fluoroethoxy]-9H-carbazole;hydrochloride	2-[2-(1-azabicyclo[2.2.2]octan-3-ylidene)-2-fluoroethoxy]-9<I>H</I>-carbazole;hydrochloride	2-[2-(1-azabicyclo[2.2.2]octan-3-ylidene)-2-fluoroethoxy]-9H-carbazole;hydrochloride	2-[2-(1-azabicyclo[2.2.2]octan-3-ylidene)-2-fluoranyl-ethoxy]-9H-carbazole;hydrochloride	2-(2-fluoro-2-quinuclidin-3-ylidene-ethoxy)-9H-carbazole;hydrochloride	InChI=1S/C21H21FN2O.ClH/c22-19(18-12-24-9-7-14(18)8-10-24)13-25-15-5-6-17-16-3-1-2-4-20(16)23-21(17)11-15;/h1-6,11,14,23H,7-10,12-13H2;1H	JWXYVHMBPISIJQ-UHFFFAOYSA-N		372.140	C21H22ClFN2O	372.900	C1CN2CCC1C(=C(COC3=CC4=C(C=C3)C5=CC=CC=C5N4)F)C2.Cl	C1CN2CCC1C(=C(COC3=CC4=C(C=C3)C5=CC=CC=C5N4)F)C2.Cl		372.140	0	26	0	0	0	1	0	2	-1	1 5 255	11 13 1 15 19 8 15 21 8 16 17 8 16 19 8 17 18 8 17 22 8 18 20 8 18 23 8 20 24 8 21 22 8 23 25 8 24 26 8 25 26 8 5 16 8 5 20 8	FALSE	0	C:\Users\qiang\Documents\Schrodinger\glide-dock_XP_346	glide-dock_XP_346_pv.maegz	1
9907532	1966	Structure2D_COMPOUND_CID_9907532.1	9907532	1	528	3	2	3	AAADceB7IQAEAAAAAAAAAAAAAAAAAWAAAAA8eLECAAAAAFgB/AAAHwAQAAAADQzhngYwxvPJlACgAyRiRACCiCAhIiAImSA+bJgMJuLEsZuGOCjm0BnI6AeQ0PMOoAAAAgACAABAAAAEAAQAAAAAAAAAAA==	2-(2-fluoro-2-quinuclidin-3-ylidene-ethoxy)-9H-carbazole;hydrochloride	2-[2-(1-azabicyclo[2.2.2]octan-3-ylidene)-2-fluoroethoxy]-9H-carbazole;hydrochloride	2-[2-(1-azabicyclo[2.2.2]octan-3-ylidene)-2-fluoroethoxy]-9<I>H</I>-carbazole;hydrochloride	2-[2-(1-azabicyclo[2.2.2]octan-3-ylidene)-2-fluoroethoxy]-9H-carbazole;hydrochloride	2-[2-(1-azabicyclo[2.2.2]octan-3-ylidene)-2-fluoranyl-ethoxy]-9H-carbazole;hydrochloride	2-(2-fluoro-2-quinuclidin-3-ylidene-ethoxy)-9H-carbazole;hydrochloride	InChI=1S/C21H21FN2O.ClH/c22-19(18-12-24-9-7-14(18)8-10-24)13-25-15-5-6-17-16-3-1-2-4-20(16)23-21(17)11-15;/h1-6,11,14,23H,7-10,12-13H2;1H	JWXYVHMBPISIJQ-UHFFFAOYSA-N		372.140	C21H22ClFN2O	372.900	C1CN2CCC1C(=C(COC3=CC4=C(C=C3)C5=CC=CC=C5N4)F)C2.Cl	C1CN2CCC1C(=C(COC3=CC4=C(C=C3)C5=CC=CC=C5N4)F)C2.Cl		372.140	0	26	0	0	0	1	0	2	-1	1 5 255	11 13 1 15 19 8 15 21 8 16 17 8 16 19 8 17 18 8 17 22 8 18 20 8 18 23 8 20 24 8 21 22 8 23 25 8 24 26 8 25 26 8 5 16 8 5 20 8	FALSE	0	C:\Users\qiang\Documents\Schrodinger\glide-dock_XP_346	glide-dock_XP_346_pv.maegz	1
7405	1967	Structure2D_COMPOUND_CID_7405.1	7405	1	154	3	2	1	AAADcYBiMAAAAAAAAAAAAAAAAAAAAWAAAAAAAAAAAAAAAAAAAAAAHgAQCAAACCjBgAQACALAAgAIAAGQGAAAAAAAAAAAAIGIAAACABIAgCAEQAAEFgCQAACcFwAAAAAAAAAAAAAAAAAAAAAAAAAAAAAAAA==	(2S)-5-oxopyrrolidine-2-carboxylic acid	(2S)-5-oxo-2-pyrrolidinecarboxylic acid	(2<I>S</I>)-5-oxopyrrolidine-2-carboxylic acid	(2S)-5-oxopyrrolidine-2-carboxylic acid	(2S)-5-oxidanylidenepyrrolidine-2-carboxylic acid	(2S)-5-ketoproline	InChI=1S/C5H7NO3/c7-4-2-1-3(6-4)5(8)9/h3H,1-2H2,(H,6,7)(H,8,9)/t3-/m0/s1	ODHCTXKNWHHXJC-VKHMYHEASA-N	-0.800	129.043	C5H7NO3	129.110	C1CC(=O)NC1C(=O)O	C1CC(=O)N[C@@H]1C(=O)O		129.043	0	9	1	0	0	0	0	1	3	1 5 255	5 9 5	TRUE	0	C:\Users\qiang\Documents\Schrodinger\glide-dock_XP_346	glide-dock_XP_346_pv.maegz	1
52924197	1968	Structure2D_COMPOUND_CID_52924197.1	52924197	1	881	9	2	40	AAADcfB+PAIAAAAAAAAAAAAAAAAAAAAAAAAAAAAAAAAAAAAAAAAAHgAQCCAACBThgAYCCABABRCIQCDSCIAAAAAgAAAICIEAAAgDABIAAQACAAAFkAAKAAOIyKCAAAAAAAAAAAAAAAAAAAAAAAAAAAAAAA==	[(1R)-1-[[2-aminoethoxy(hydroxy)phosphoryl]oxymethyl]-2-[(Z)-pentadec-9-enoyl]oxy-ethyl] (Z)-icos-11-enoate	(Z)-11-eicosenoic acid [(2R)-1-[2-aminoethoxy(hydroxy)phosphoryl]oxy-3-[(Z)-1-oxopentadec-9-enoxy]propan-2-yl] ester	[(2<I>R</I>)-1-[2-aminoethoxy(hydroxy)phosphoryl]oxy-3-[(<I>Z</I>)-pentadec-9-enoyl]oxypropan-2-yl] (<I>Z</I>)-icos-11-enoate	[(2R)-1-[2-aminoethoxy(hydroxy)phosphoryl]oxy-3-[(Z)-pentadec-9-enoyl]oxypropan-2-yl] (Z)-icos-11-enoate	[(2R)-1-[2-azanylethoxy(oxidanyl)phosphoryl]oxy-3-[(Z)-pentadec-9-enoyl]oxy-propan-2-yl] (Z)-icos-11-enoate	(Z)-eicos-11-enoic acid [(1R)-1-[[2-aminoethoxy(hydroxy)phosphoryl]oxymethyl]-2-[(Z)-pentadec-9-enoyl]oxy-ethyl] ester	InChI=1S/C40H76NO8P/c1-3-5-7-9-11-13-15-17-18-19-20-21-23-25-27-29-31-33-40(43)49-38(37-48-50(44,45)47-35-34-41)36-46-39(42)32-30-28-26-24-22-16-14-12-10-8-6-4-2/h12,14,17-18,38H,3-11,13,15-16,19-37,41H2,1-2H3,(H,44,45)/b14-12-,18-17-/t38-/m1/s1	NTYJEMKAEOZSIT-GHGQKOEXSA-N		729.531	C40H76NO8P	730.000	CCCCCCCCC=CCCCCCCCCCC(=O)OC(COC(=O)CCCCCCCC=CCCCCC)COP(=O)(O)OCCN	CCCCCCCC/C=C\CCCCCCCCCC(=O)O[C@H](COC(=O)CCCCCCC/C=C\CCCCC)COP(=O)(O)OCCN	134	729.531	0	50	1	0	2	0	0	1	-1	1 5 255	37 2 5	TRUE	0	C:\Users\qiang\Documents\Schrodinger\glide-dock_XP_346	glide-dock_XP_346_pv.maegz	1
95877	1969	Structure2D_COMPOUND_CID_95877.1	95877	1	229	3	1	1	AAADccByMAAAAAAAAAAAAAAAAAAAAAAAAAA8QAAAAAAAAACx8AAAHgAACAAADAzBngQ+xvIIEgCoA7R3RASCgCA1YiAI2CE/bNgKJvLSlZOEcQhkwBHY2YeczLDOoAABQAASEABAAAKAACQgAAAAAAAAAA==	1-(8-hydroxy-5-quinolyl)ethanone	1-(8-hydroxy-5-quinolinyl)ethanone	1-(8-hydroxyquinolin-5-yl)ethanone	1-(8-hydroxyquinolin-5-yl)ethanone	1-(8-oxidanylquinolin-5-yl)ethanone	1-(8-hydroxy-5-quinolyl)ethanone	InChI=1S/C11H9NO2/c1-7(13)8-4-5-10(14)11-9(8)3-2-6-12-11/h2-6,14H,1H3	HZTCLDNADGMACV-UHFFFAOYSA-N		187.063	C11H9NO2	187.190	CC(=O)C1=C2C=CC=NC2=C(C=C1)O	CC(=O)C1=C2C=CC=NC2=C(C=C1)O		187.063	0	14	0	0	0	0	0	1	7	1 5 255	12 13 8 3 13 8 3 6 8 4 5 8 4 6 8 4 9 8 5 8 8 6 7 8 7 10 8 8 10 8 9 12 8	FALSE	0	C:\Users\qiang\Documents\Schrodinger\glide-dock_XP_346	glide-dock_XP_346_pv.maegz	1
10459878	1970	Structure2D_COMPOUND_CID_10459878.1	10459878	1	916	12	7	11	AAADceB4PAAAAAAAAAAAAAAAAAAAAAAAAAAwYMAAAAAAAAABUAAAGgAACAAADBSgmAIwDoAABgCIAiDSCAICCAAgIAAIiAFGiMgNJjKGMR6CeCOkwBELuYeI6LyOIAABAAAAQABAAAIAAACAAAAAAAAAAA==	2-[(E)-3-[4-[(Z)-1-carboxy-2-(3,4-dihydroxyphenyl)vinyloxy]-3-hydroxy-phenyl]prop-2-enoyl]oxy-3-(3,4-dihydroxyphenyl)propanoic acid	2-[(E)-3-[4-[(Z)-1-carboxy-2-(3,4-dihydroxyphenyl)ethenoxy]-3-hydroxyphenyl]-1-oxoprop-2-enoxy]-3-(3,4-dihydroxyphenyl)propanoic acid	2-[(<I>E</I>)-3-[4-[(<I>Z</I>)-1-carboxy-2-(3,4-dihydroxyphenyl)ethenoxy]-3-hydroxyphenyl]prop-2-enoyl]oxy-3-(3,4-dihydroxyphenyl)propanoic acid	2-[(E)-3-[4-[(Z)-1-carboxy-2-(3,4-dihydroxyphenyl)ethenoxy]-3-hydroxyphenyl]prop-2-enoyl]oxy-3-(3,4-dihydroxyphenyl)propanoic acid	3-[3,4-bis(oxidanyl)phenyl]-2-[(E)-3-[4-[(Z)-1-[3,4-bis(oxidanyl)phenyl]-3-oxidanyl-3-oxidanylidene-prop-1-en-2-yl]oxy-3-oxidanyl-phenyl]prop-2-enoyl]oxy-propanoic acid	2-[(E)-3-[4-[(Z)-1-carboxy-2-(3,4-dihydroxyphenyl)vinyloxy]-3-hydroxy-phenyl]acryloyl]oxy-3-(3,4-dihydroxyphenyl)propionic acid	InChI=1S/C27H22O12/c28-17-5-1-15(10-19(17)30)12-23(26(34)35)38-22-7-3-14(9-21(22)32)4-8-25(33)39-24(27(36)37)13-16-2-6-18(29)20(31)11-16/h1-12,24,28-32H,13H2,(H,34,35)(H,36,37)/b8-4+,23-12-	MZSGWZGPESCJAN-JKXXRSRDSA-N	3.700	538.111	C27H22O12	538.500	C1=CC(=C(C=C1CC(C(=O)O)OC(=O)C=CC2=CC(=C(C=C2)OC(=CC3=CC(=C(C=C3)O)O)C(=O)O)O)O)O	C1=CC(=C(C=C1CC(C(=O)O)OC(=O)/C=C/C2=CC(=C(C=C2)O/C(=C\C3=CC(=C(C=C3)O)O)/C(=O)O)O)O)O	211	538.111	0	39	0	1	2	0	0	1	-1	1 5 255	14 13 3 15 16 8 15 17 8 16 19 8 17 20 8 19 21 8 20 21 8 23 27 8 23 28 8 25 29 8 25 30 8 27 29 8 28 30 8 31 34 8 31 35 8 34 36 8 35 37 8 36 38 8 37 38 8	TRUE	0	C:\Users\qiang\Documents\Schrodinger\glide-dock_XP_346	glide-dock_XP_346_pv.maegz	1
52926248	1971	Structure2D_COMPOUND_CID_52926248.1	52926248	1	1000	10	3	42	AAADcfB+PAIAAAAAAAAAAAAAAAAAAAAAAAAAAAAAAAAAAAAAAAAAHgAQCCAACDzhgAYCCABABxCIQCDSCIAACAAgIAAICIGAAAgDABYAAQACQAAFsAAKAAOIyKCAAAAAAAAAAAAAAAAAAAAAAAAAAAAAAA==	(2S)-2-amino-3-[[(2R)-2-[(9Z,12Z)-heptadeca-9,12-dienoyl]oxy-3-[(Z)-icos-1-enoxy]propoxy]-hydroxy-phosphoryl]oxy-propanoic acid	(2S)-2-amino-3-[[(2R)-3-[(Z)-eicos-1-enoxy]-2-[(9Z,12Z)-1-oxoheptadeca-9,12-dienoxy]propoxy]-hydroxyphosphoryl]oxypropanoic acid	(2<I>S</I>)-2-amino-3-[[(2<I>R</I>)-2-[(9<I>Z</I>,12<I>Z</I>)-heptadeca-9,12-dienoyl]oxy-3-[(<I>Z</I>)-icos-1-enoxy]propoxy]-hydroxyphosphoryl]oxypropanoic acid	(2S)-2-amino-3-[[(2R)-2-[(9Z,12Z)-heptadeca-9,12-dienoyl]oxy-3-[(Z)-icos-1-enoxy]propoxy]-hydroxyphosphoryl]oxypropanoic acid	(2S)-2-azanyl-3-[[(2R)-2-[(9Z,12Z)-heptadeca-9,12-dienoyl]oxy-3-[(Z)-icos-1-enoxy]propoxy]-oxidanyl-phosphoryl]oxy-propanoic acid	(2S)-2-amino-3-[[(2R)-3-[(Z)-eicos-1-enoxy]-2-[(9Z,12Z)-heptadeca-9,12-dienoyl]oxy-propoxy]-hydroxy-phosphoryl]oxy-propionic acid	InChI=1S/C43H80NO9P/c1-3-5-7-9-11-13-15-17-19-20-21-22-24-26-28-30-32-34-36-50-37-40(38-51-54(48,49)52-39-41(44)43(46)47)53-42(45)35-33-31-29-27-25-23-18-16-14-12-10-8-6-4-2/h10,12,16,18,34,36,40-41H,3-9,11,13-15,17,19-33,35,37-39,44H2,1-2H3,(H,46,47)(H,48,49)/b12-10-,18-16-,36-34-/t40-,41+/m1/s1	QPGZOKDJJCDLTE-ZMQHXYENSA-N	11.500	785.557	C43H80NO9P	786.100	CCCCCCCCCCCCCCCCCCC=COCC(COP(=O)(O)OCC(C(=O)O)N)OC(=O)CCCCCCCC=CCC=CCCCC	CCCCCCCCCCCCCCCCCC/C=C\OC[C@H](COP(=O)(O)OC[C@@H](C(=O)O)N)OC(=O)CCCCCCC/C=C\C/C=C\CCCC	155	785.557	0	54	2	0	3	0	0	1	-1	1 5 255	52 11 6 39 3 5	TRUE	0	C:\Users\qiang\Documents\Schrodinger\glide-dock_XP_346	glide-dock_XP_346_pv.maegz	1
[truncated: 277 more columns]

## Sheet: Table s8
Title	XP GScore
439606	-12.391
446495	-11.698
445937	-11.608
50909794	-11.245
94448	-11.242
94448	-11.242
101039148	-10.68
443363	-10.459
44258591	-10.372
67309075	-9.956
73981596	-9.944
44258423	-9.809
145457927	-9.708
6441498	-9.302
50909833	-9.273
16681750	-9.231
439512	-9.118
439512	-9.118
44257153	-9.037
44257153	-9.037
44347795	-8.783
101635263	-8.742
85183002	-8.714
441472	-8.684
5281793	-8.65
5281793	-8.65
5281266	-8.648
145458479	-8.588
9907532	-8.574
131752247	-8.53
9907532	-8.472
45139032	-8.413
53491908	-8.38
9548805	-8.311
441314	-8.226
21582559	-8.142
11782294	-8.132
67309075	-8.11
656512	-8.01
10508871	-8.003
25128229	-7.918
11765414	-7.856
103565340	-7.832
440772	-7.81
481576269	-7.794
14312558	-7.78
145458422	-7.698
10559369	-7.692
50909833	-7.665
78187444	-7.648
365614	-7.643
53491908	-7.597
102153520	-7.557
131751338	-7.557
160355	-7.511
75046985	-7.467
6440659	-7.425
461510965	-7.409
463567041	-7.409
145457451	-7.276
443000	-7.18
5281879	-7.163
3129	-7.119
439999	-7.08
439999	-7.08
3356	-7.045
145458422	-7.045
85173339	-7.03
33478	-7.03
145457466	-6.987
133741	-6.985
131751466	-6.968
439514	-6.861
83856	-6.818
4364	-6.737
53997579	-6.73
103617654	-6.721
71070	-6.718
188661	-6.7
90479478	-6.678
6834	-6.66
135926548	-6.622
90479478	-6.615
85375228	-6.466
14825849	-6.454
73419	-6.423
463933453	-6.357
135926548	-6.349
441970	-6.295
4086	-6.263
60961	-6.231
94230	-6.218
101039147	-6.177
5326317	-6.138
7099	-6.123
92751	-6.122
71307583	-6.114
44258657	-6.08
15559187	-6.056
312247914	-6.056
151108	-5.986
247955	-5.971
274147427	-5.97
78171387	-5.959
72968	-5.833
154035	-5.771
44258471	-5.736
9914412	-5.578
14507160	-5.572
892	-5.549
157010667	-5.511
168948	-5.489
168948	-5.489
103565301	-5.48
637541	-5.471
52931396	-5.452
158980	-5.395
16218957	-5.379
41648	-5.295
5280682	-5.29
6029	-5.276
5317559	-5.138
95549476	-5.131
11369918	-5.114
82100931	-5.087
42608142	-5.071
42608142	-5.071
235905	-4.989
159134	-4.937
15613266	-4.935
13650	-4.92
7407	-4.913
9914412	-4.796
12305725	-4.694
85355631	-4.57
7254	-4.54
14704626	-4.466
14704626	-4.466
442088	-4.447
704473	-4.437
95877	-4.399
441964	-4.302
9579050	-4.229
9907532	-4.224
9907532	-4.224
337776	-4.193
5318562	-4.186
441575	-4.18
108	-4.069
3366	-4.04
16	-3.91
7405	-3.674
52924197	-3.577
10459878	-2.682
52926248	-1.841
