# Supplementary material for: Unveiling the Antidiabetic Potential of Achyranthes aspera In Vitro and In Silico Efficacy Insights
Source: Research Square preprint supplement (doi:10.21203/rs.3.rs-5777722/v1), 2025-04-29
Supplement: Supplementary file 5 [file 8f1754bc35f8eeedf2a4e106.docx]

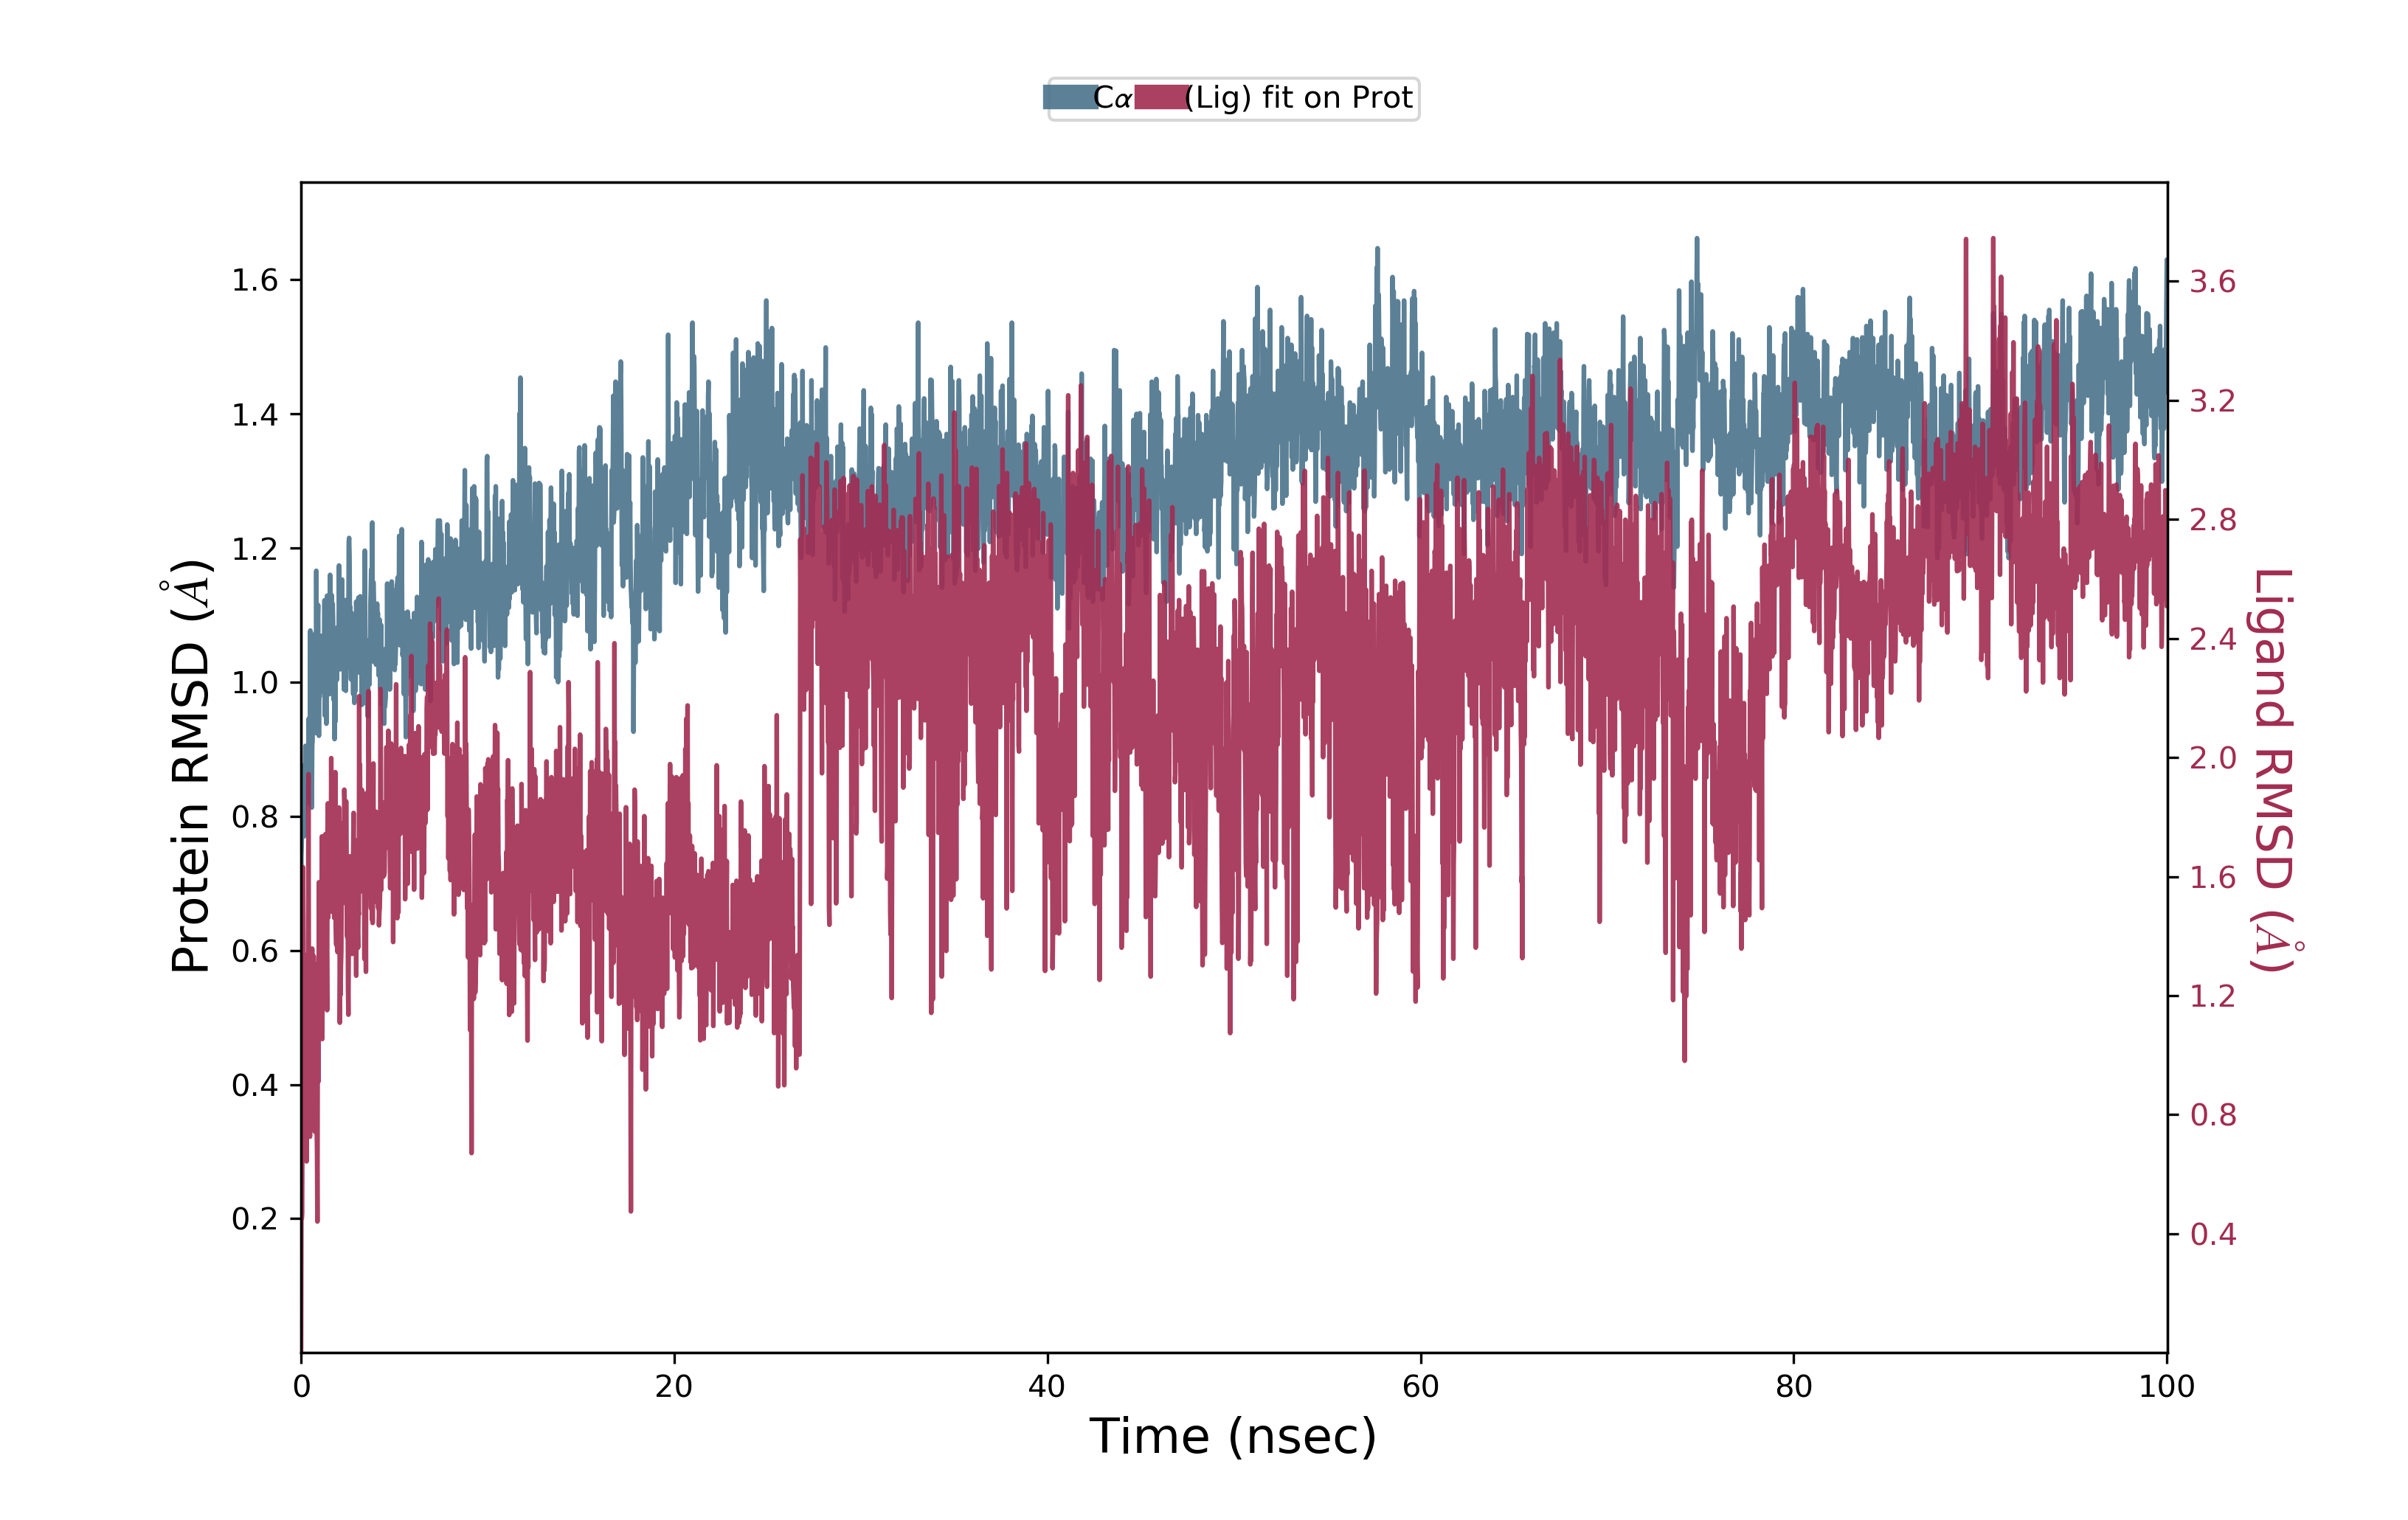


**Figure S7:** The RMSD trajectories and interaction of α-amylase (3DHP) protein-ligand (**Catechin 5-O-gallate).**


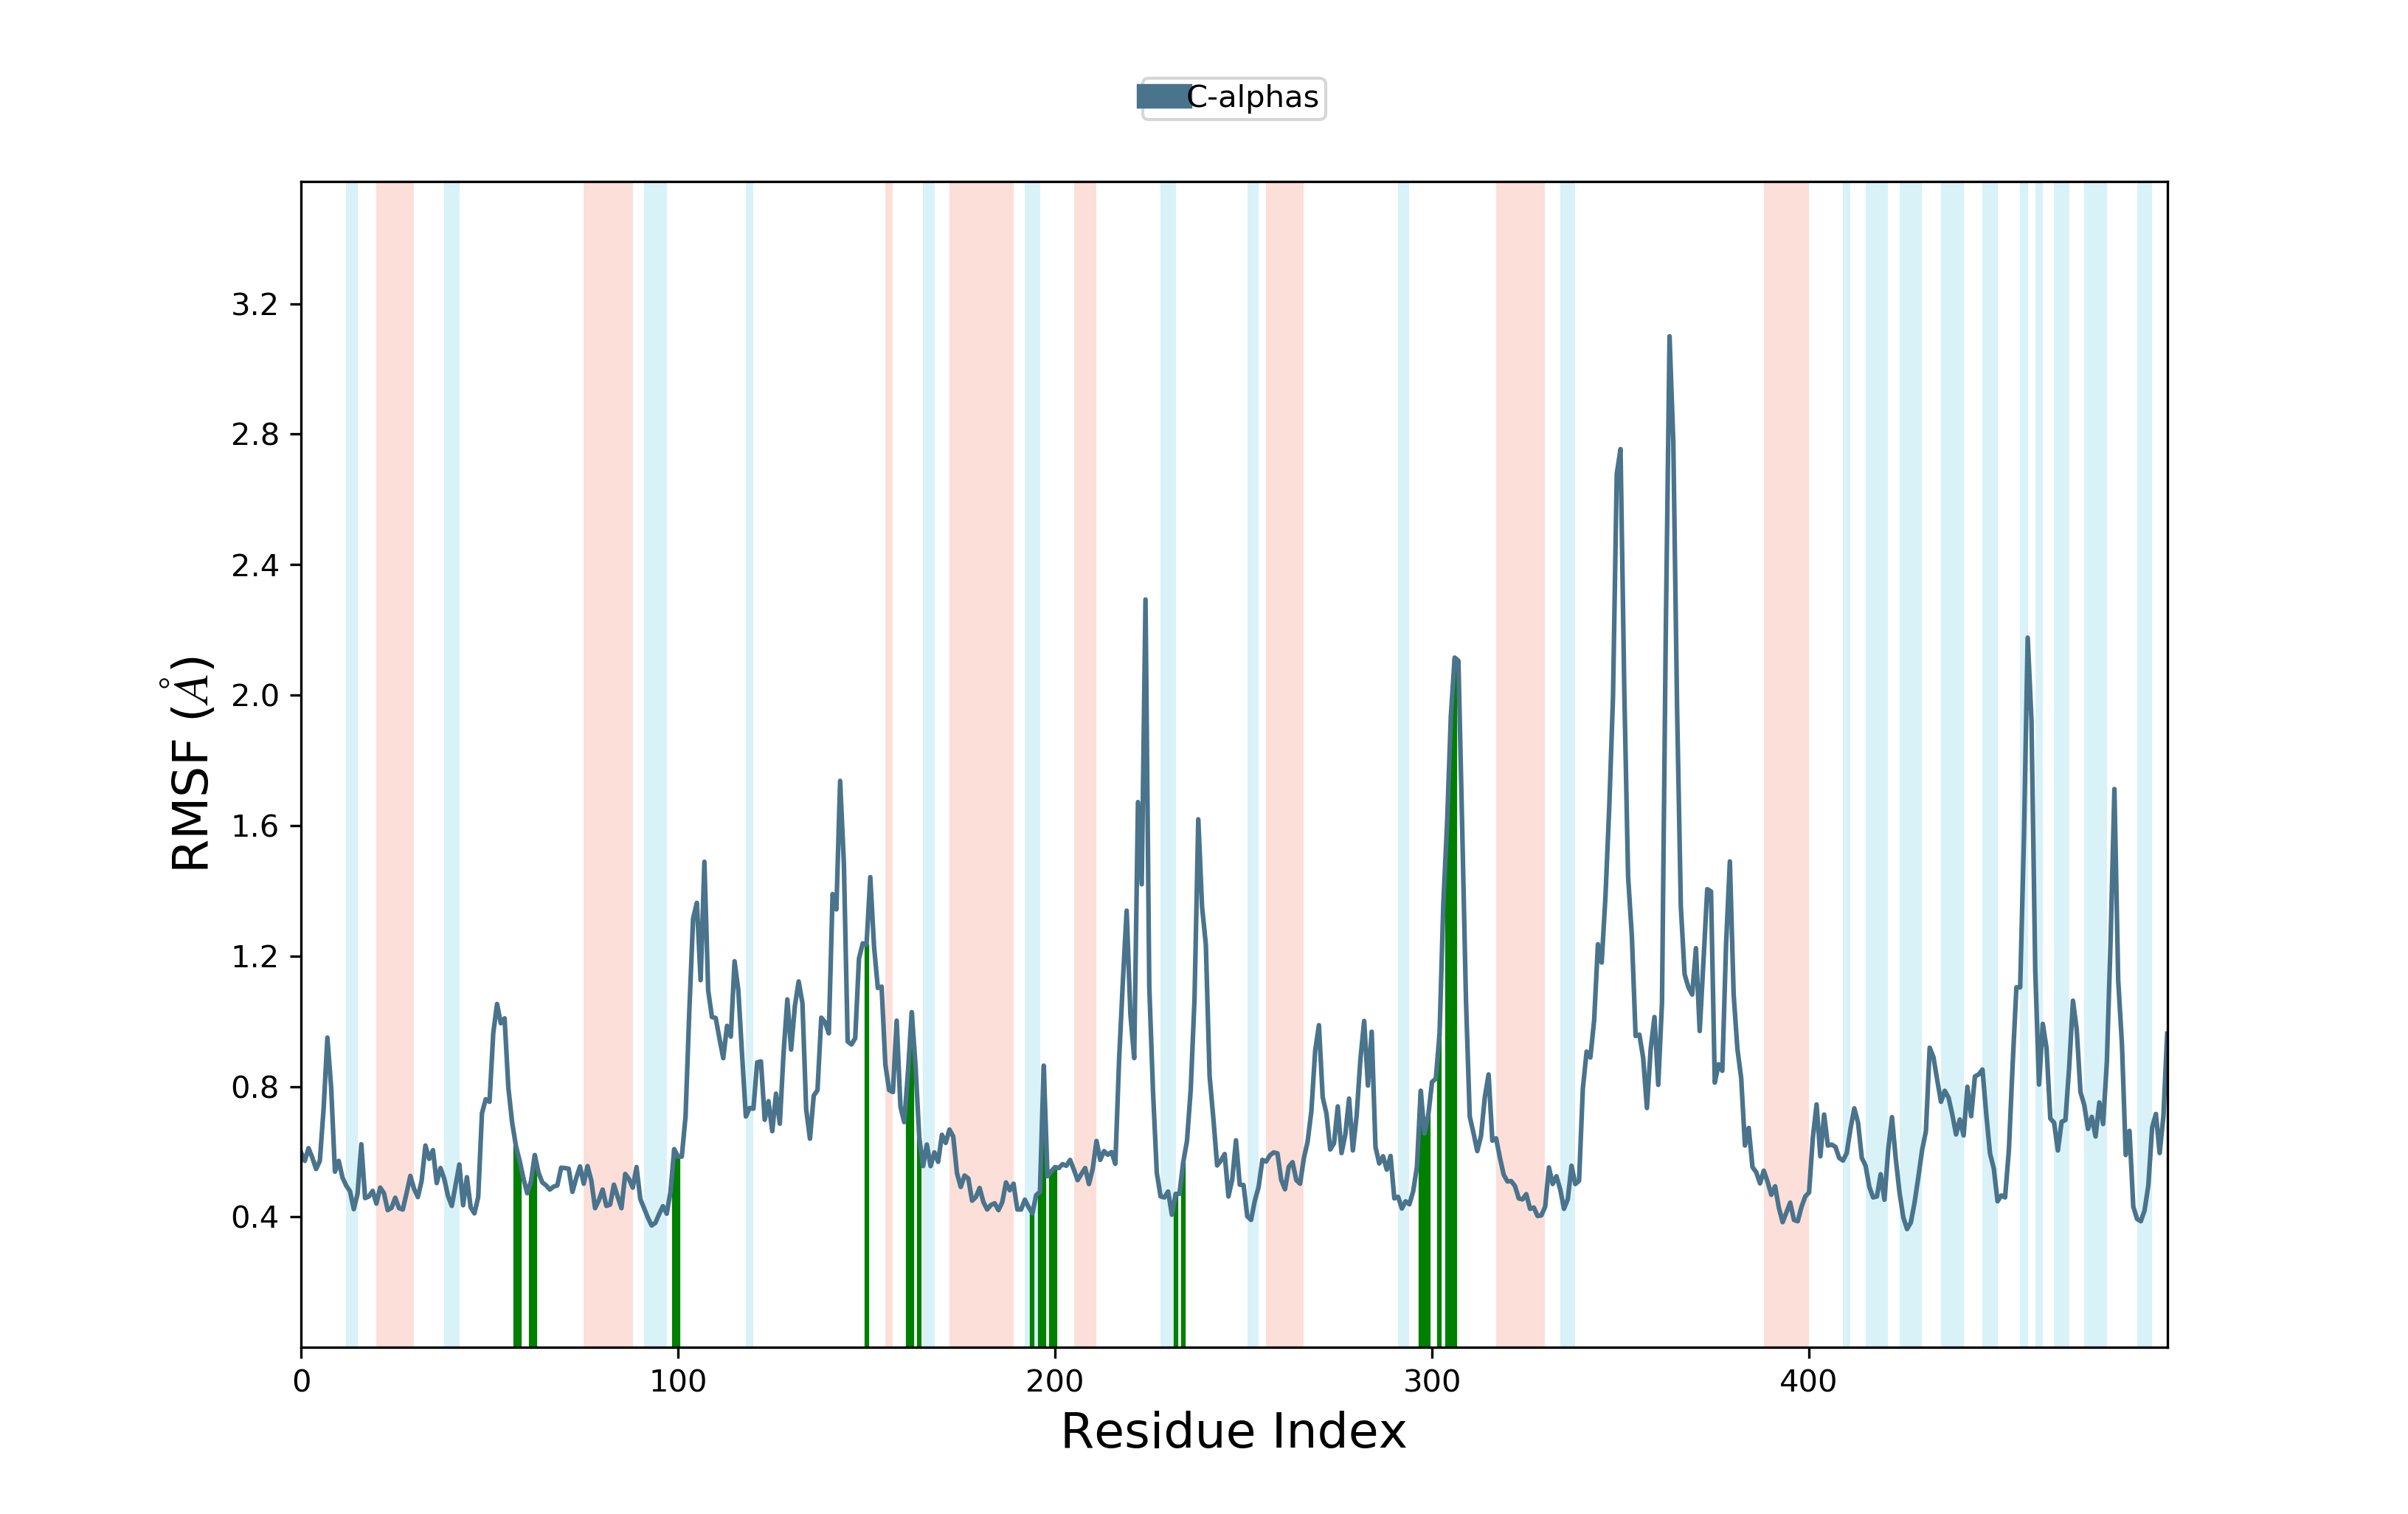


**Figure S8:** The RMSF trajectories and interaction of α-amylase (3DHP) protein-ligand (**Catechin 5-O-gallate).**

***Catechin 5-O-gallate***

**
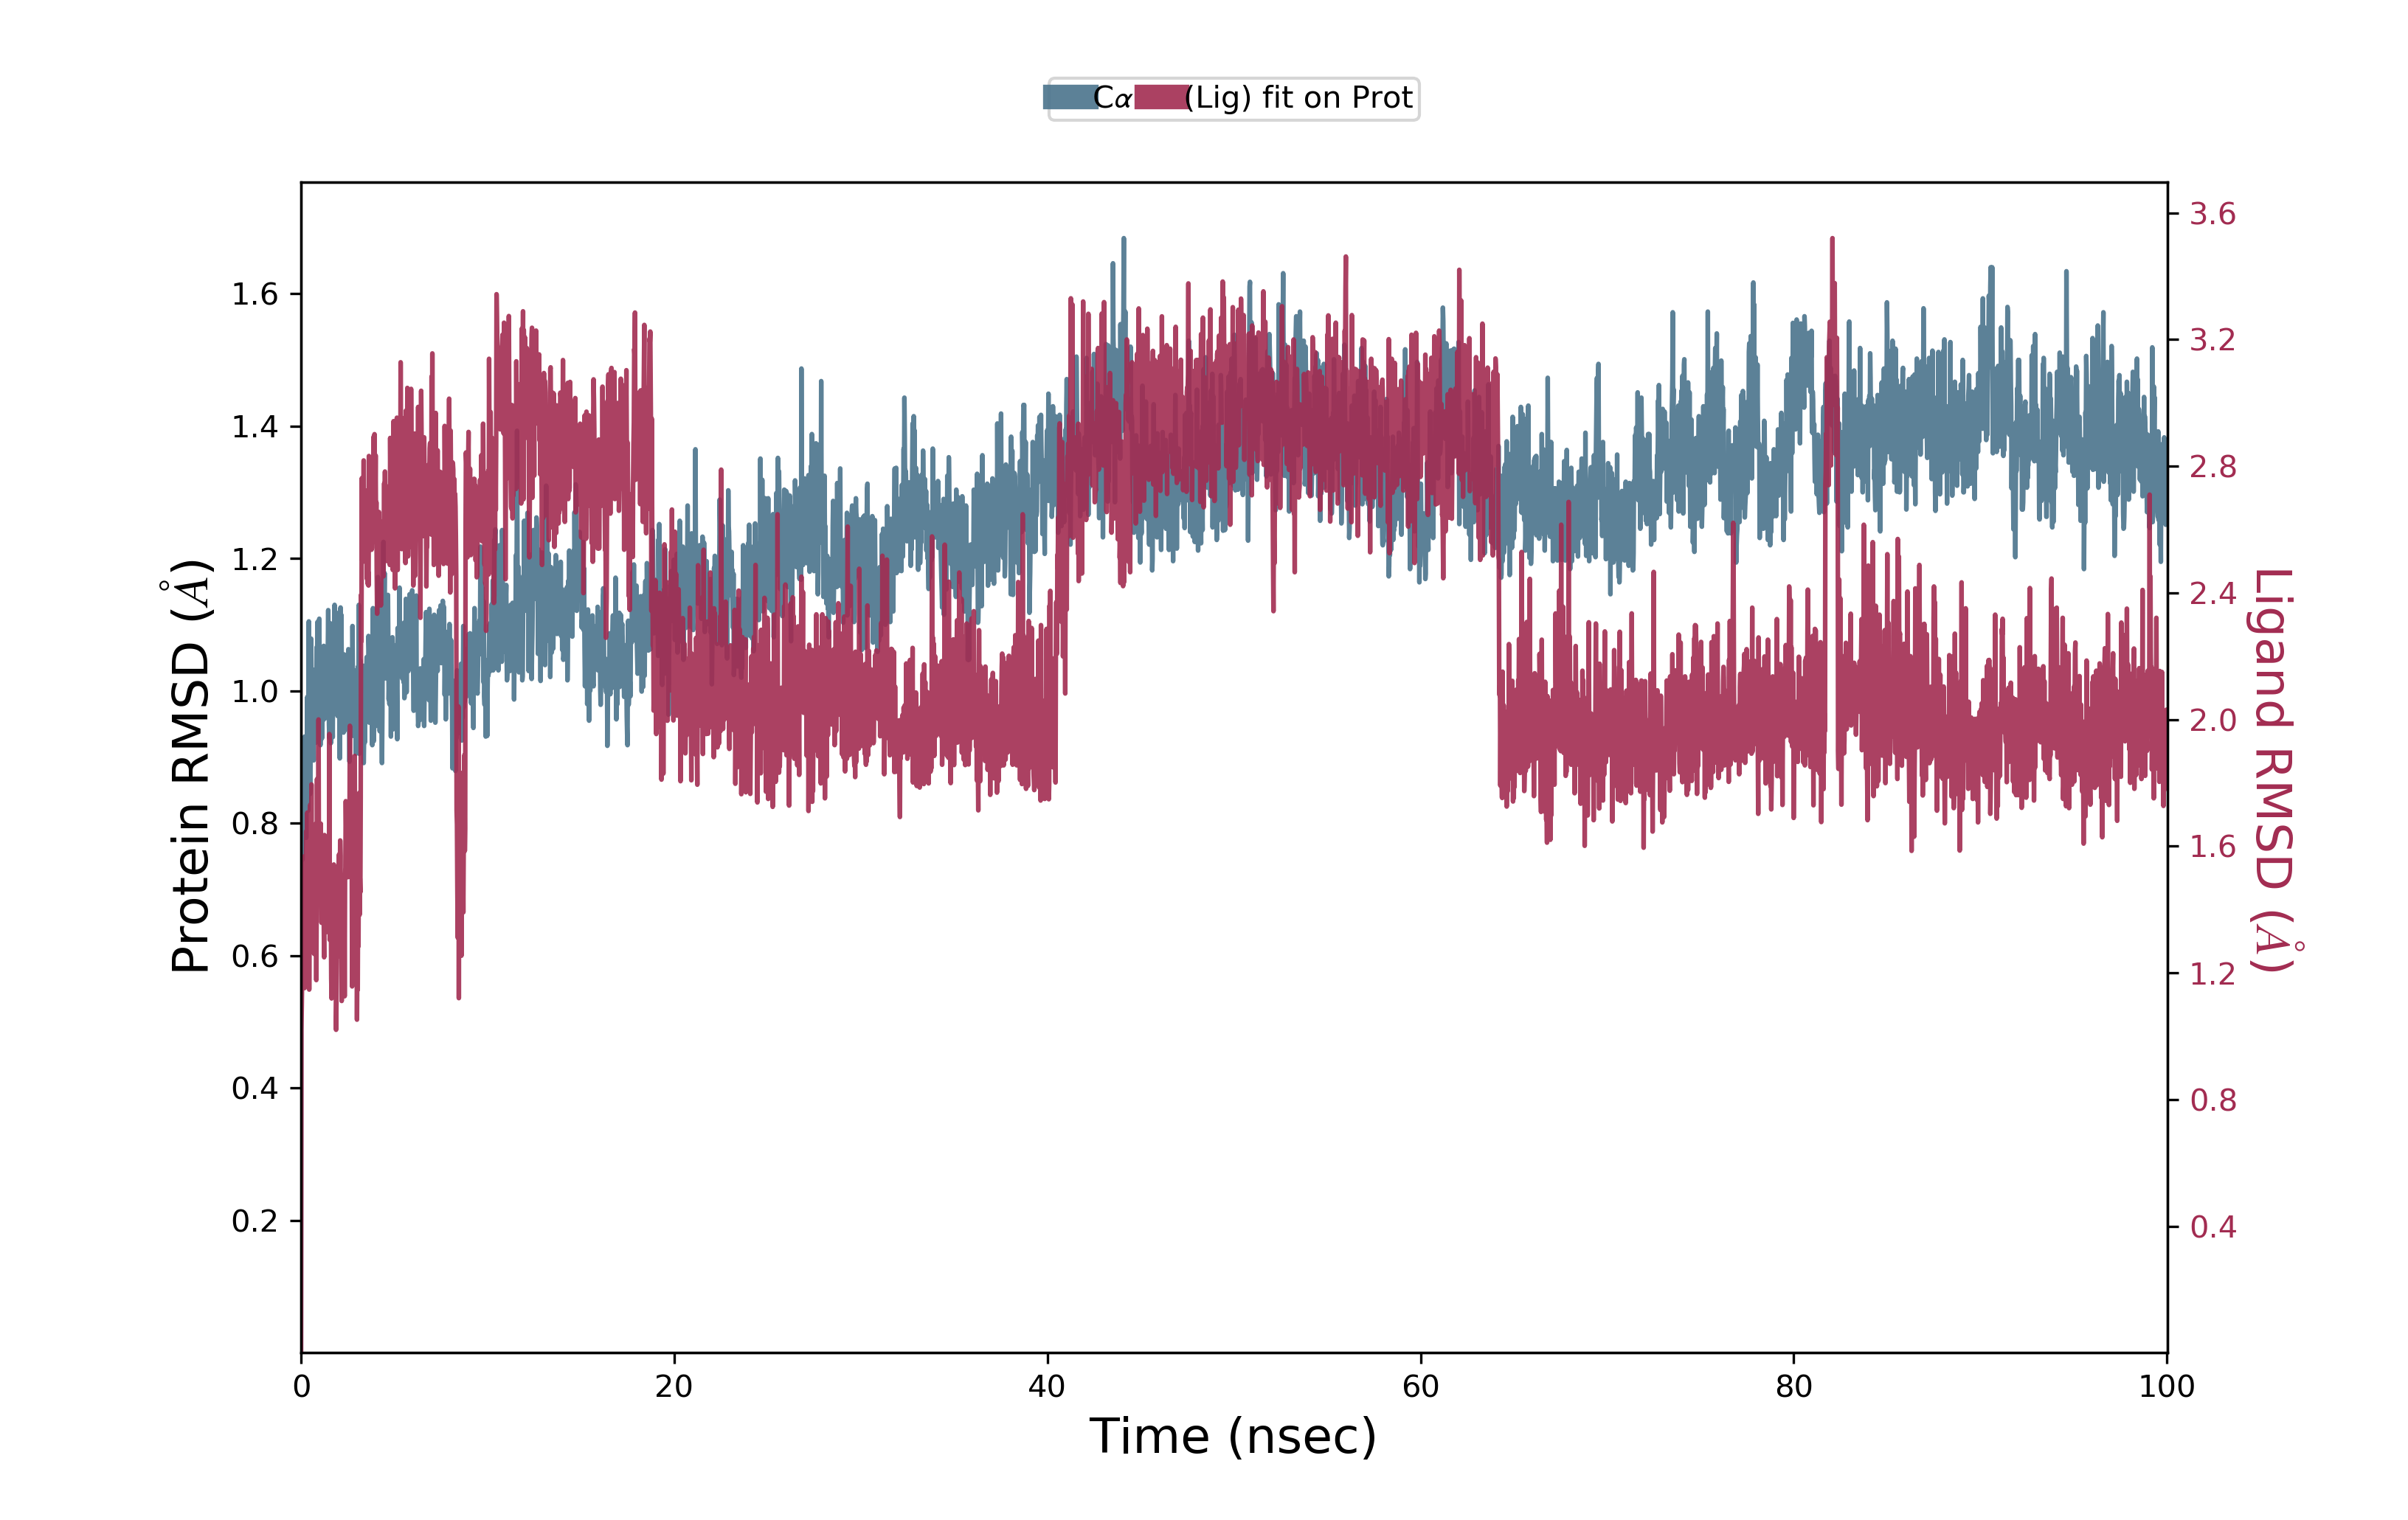
**

**Figure S9:** The RMSD trajectories and interaction of α-amylase (3DHP) protein-ligand ***Crosatoside B***


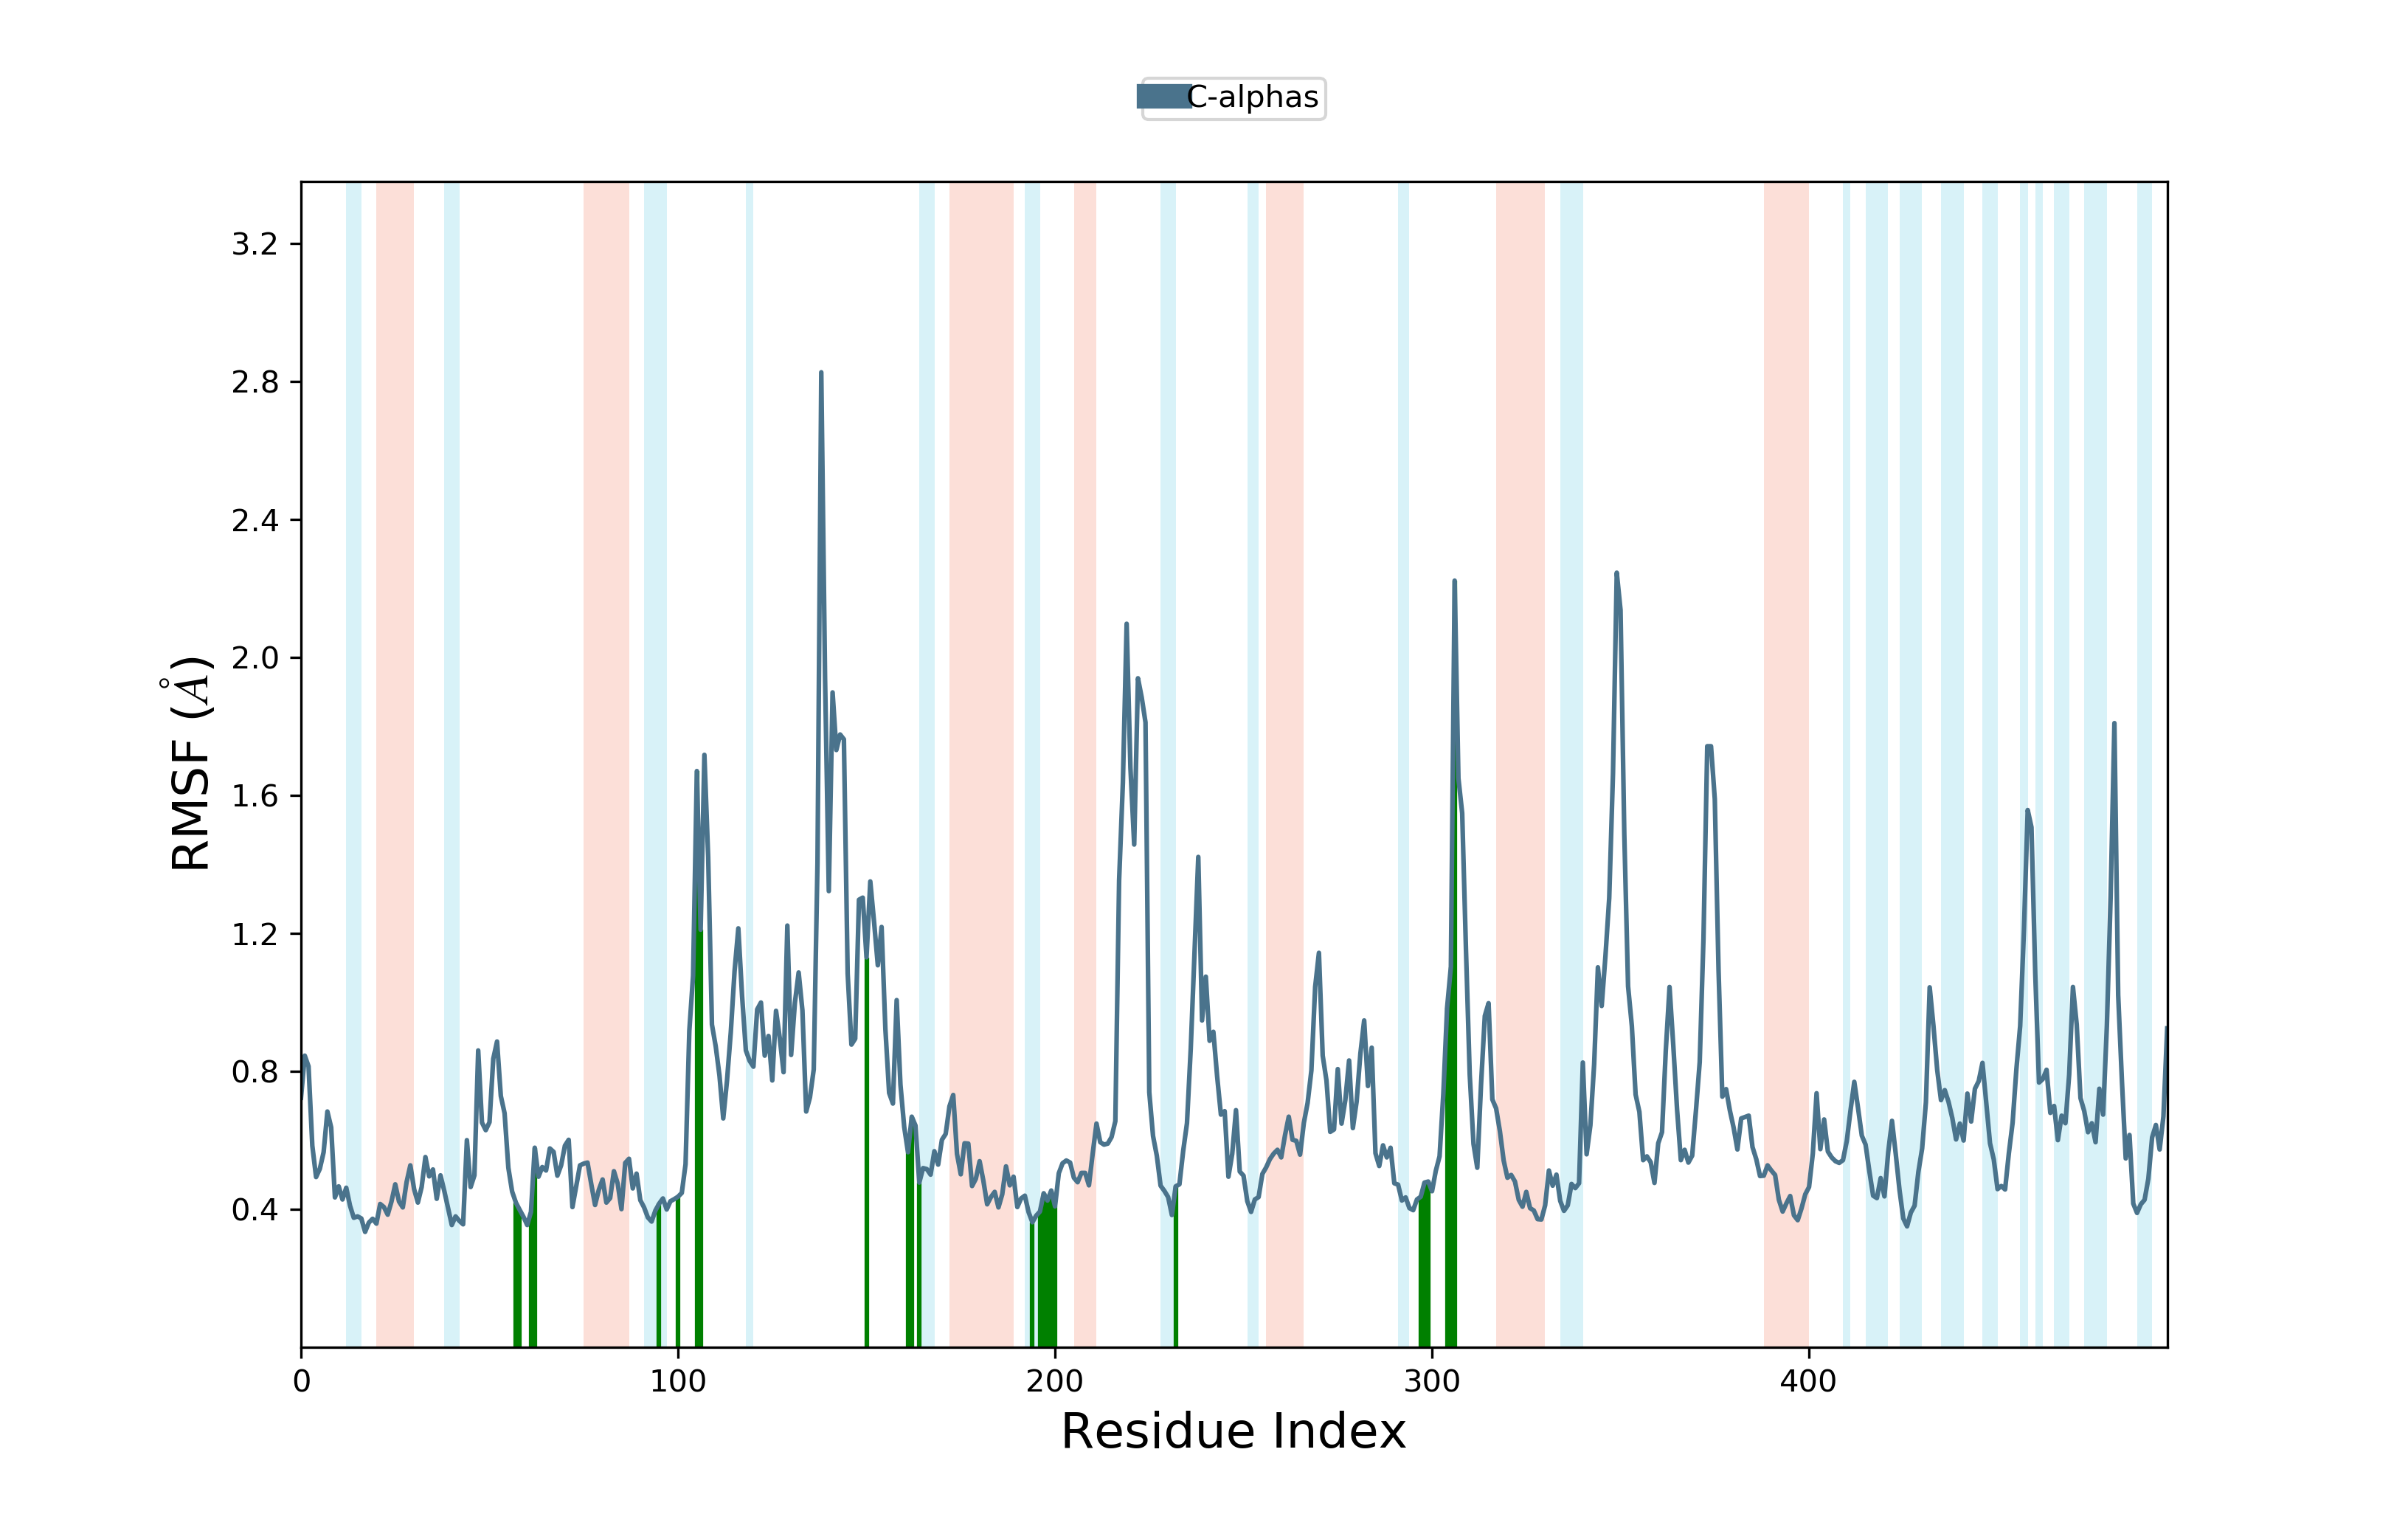


**Figure S10:** The RMSF trajectories and interaction of α-amylase (3DHP) protein-ligand ***Crosatoside B***


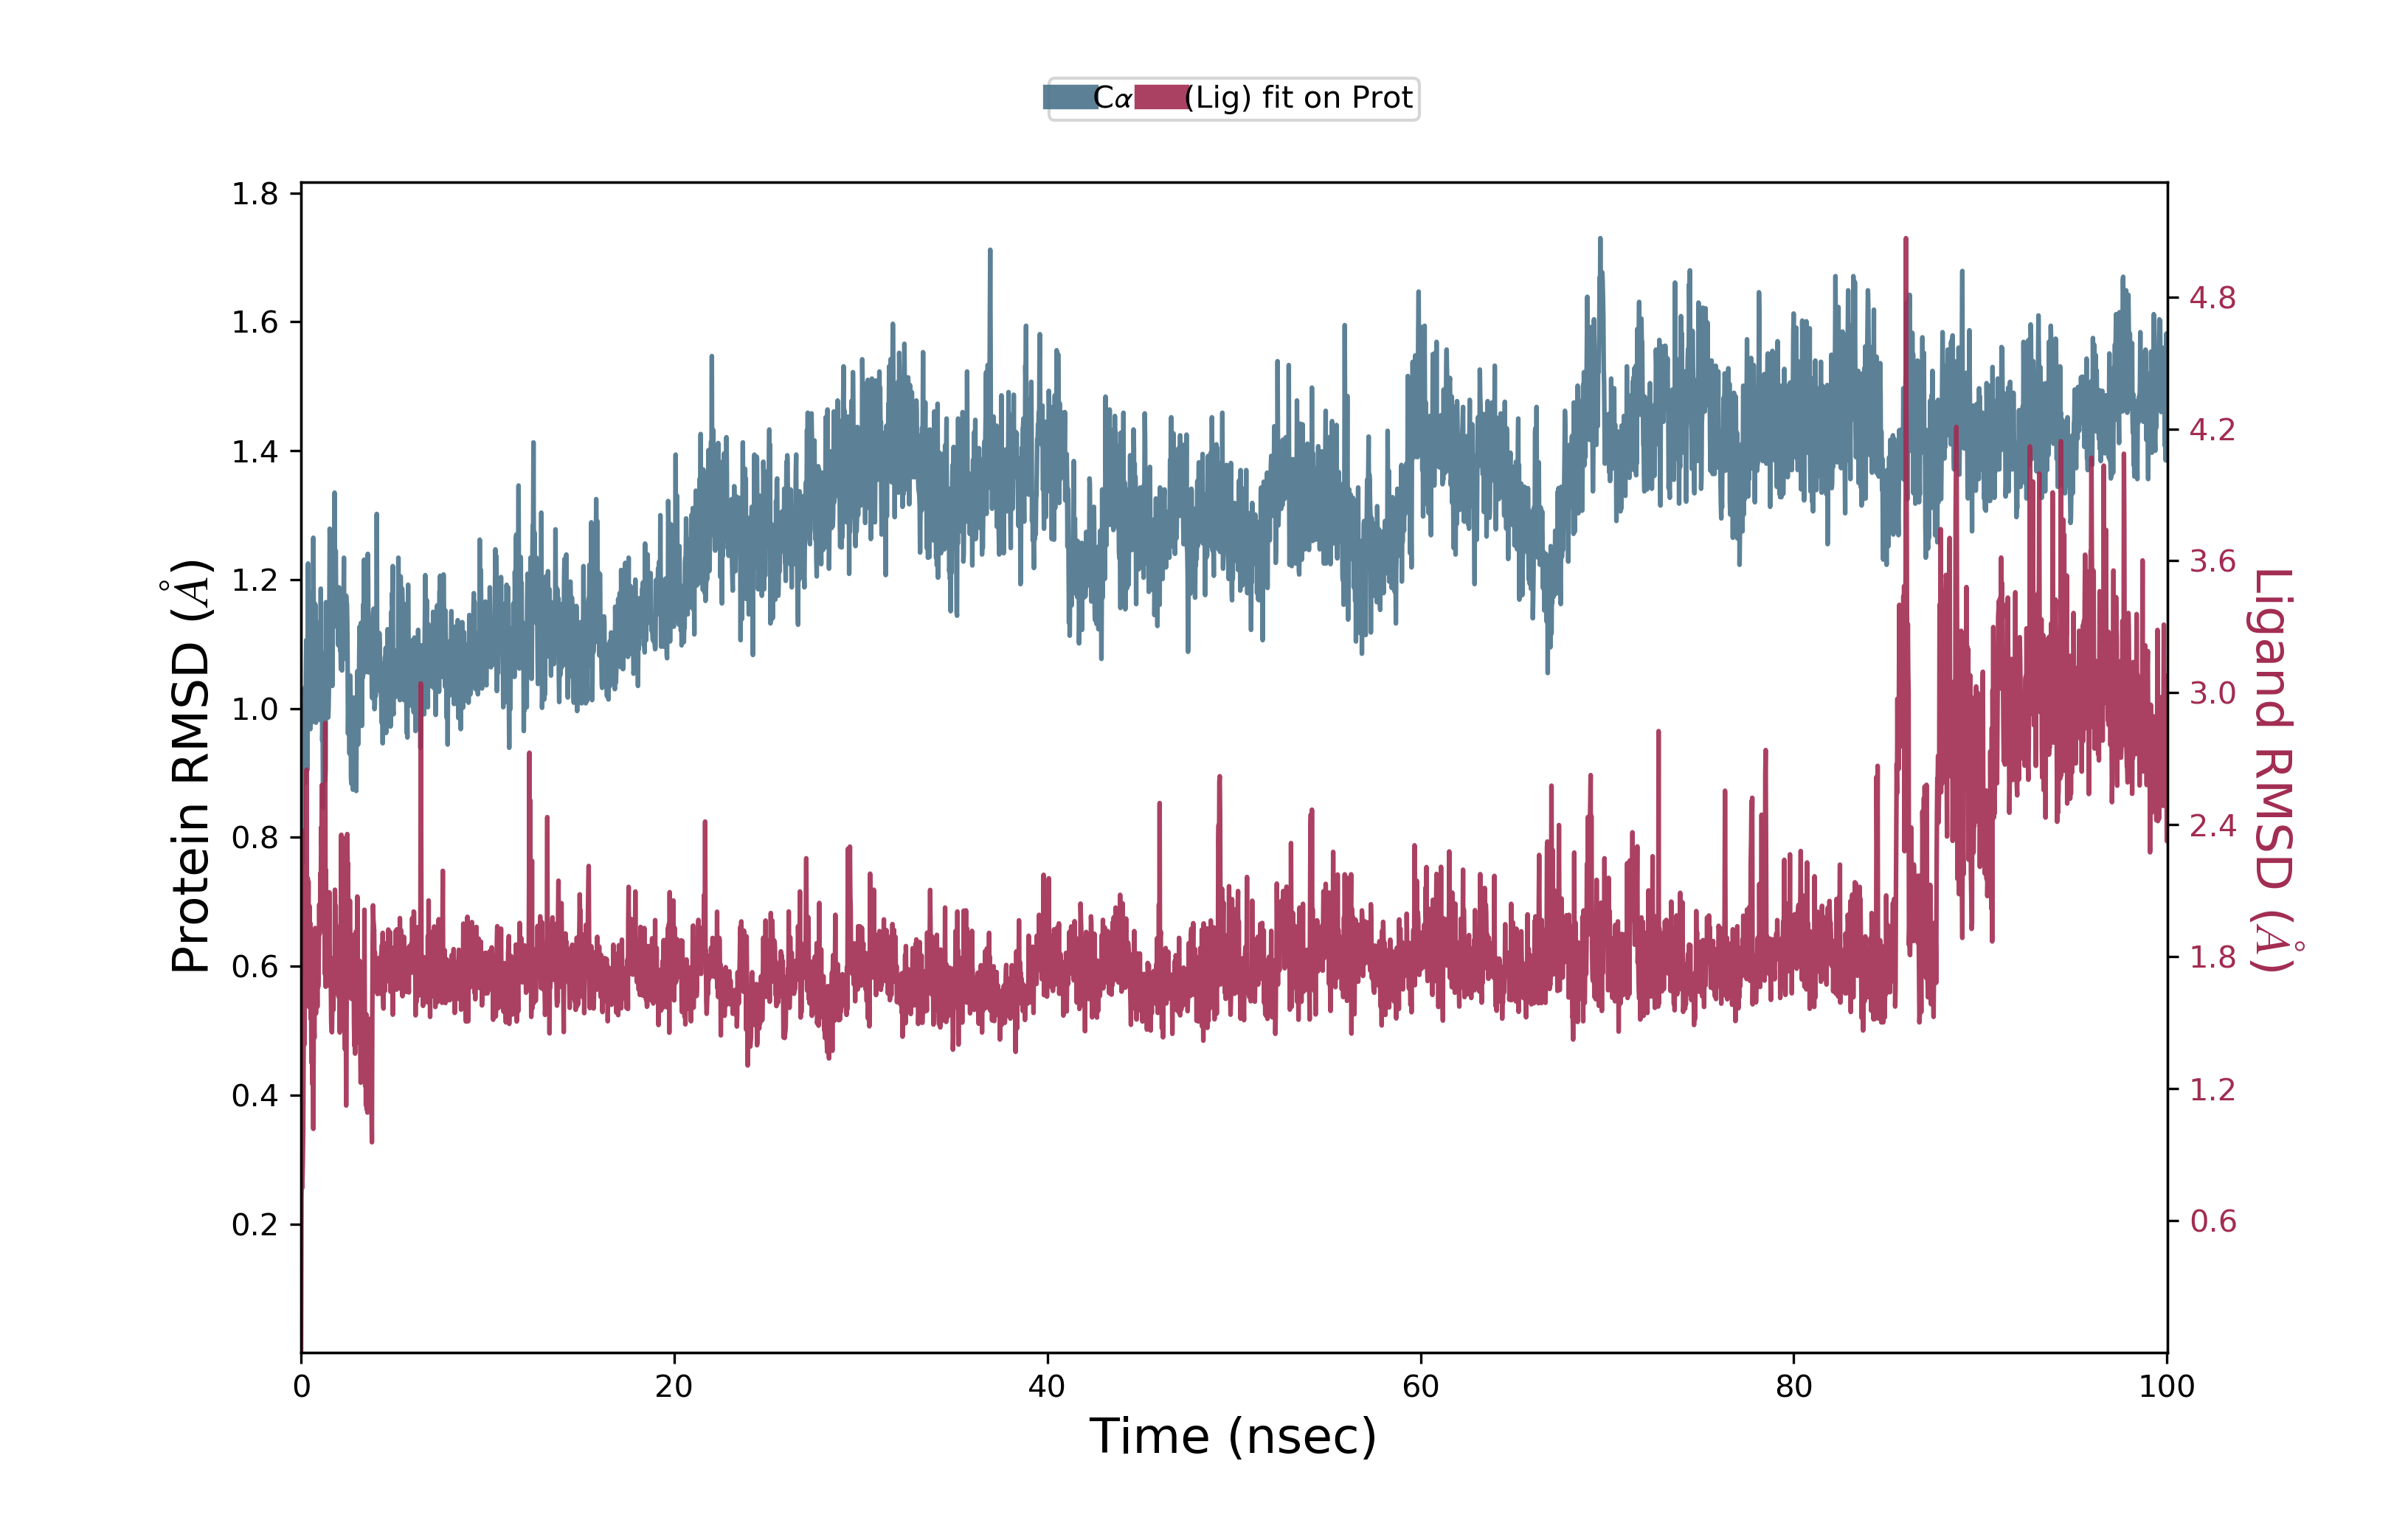


**Figure S11:** The RMSD trajectories and interaction of α-amylase (3DHP) protein-ligand ***Hypoglycin***


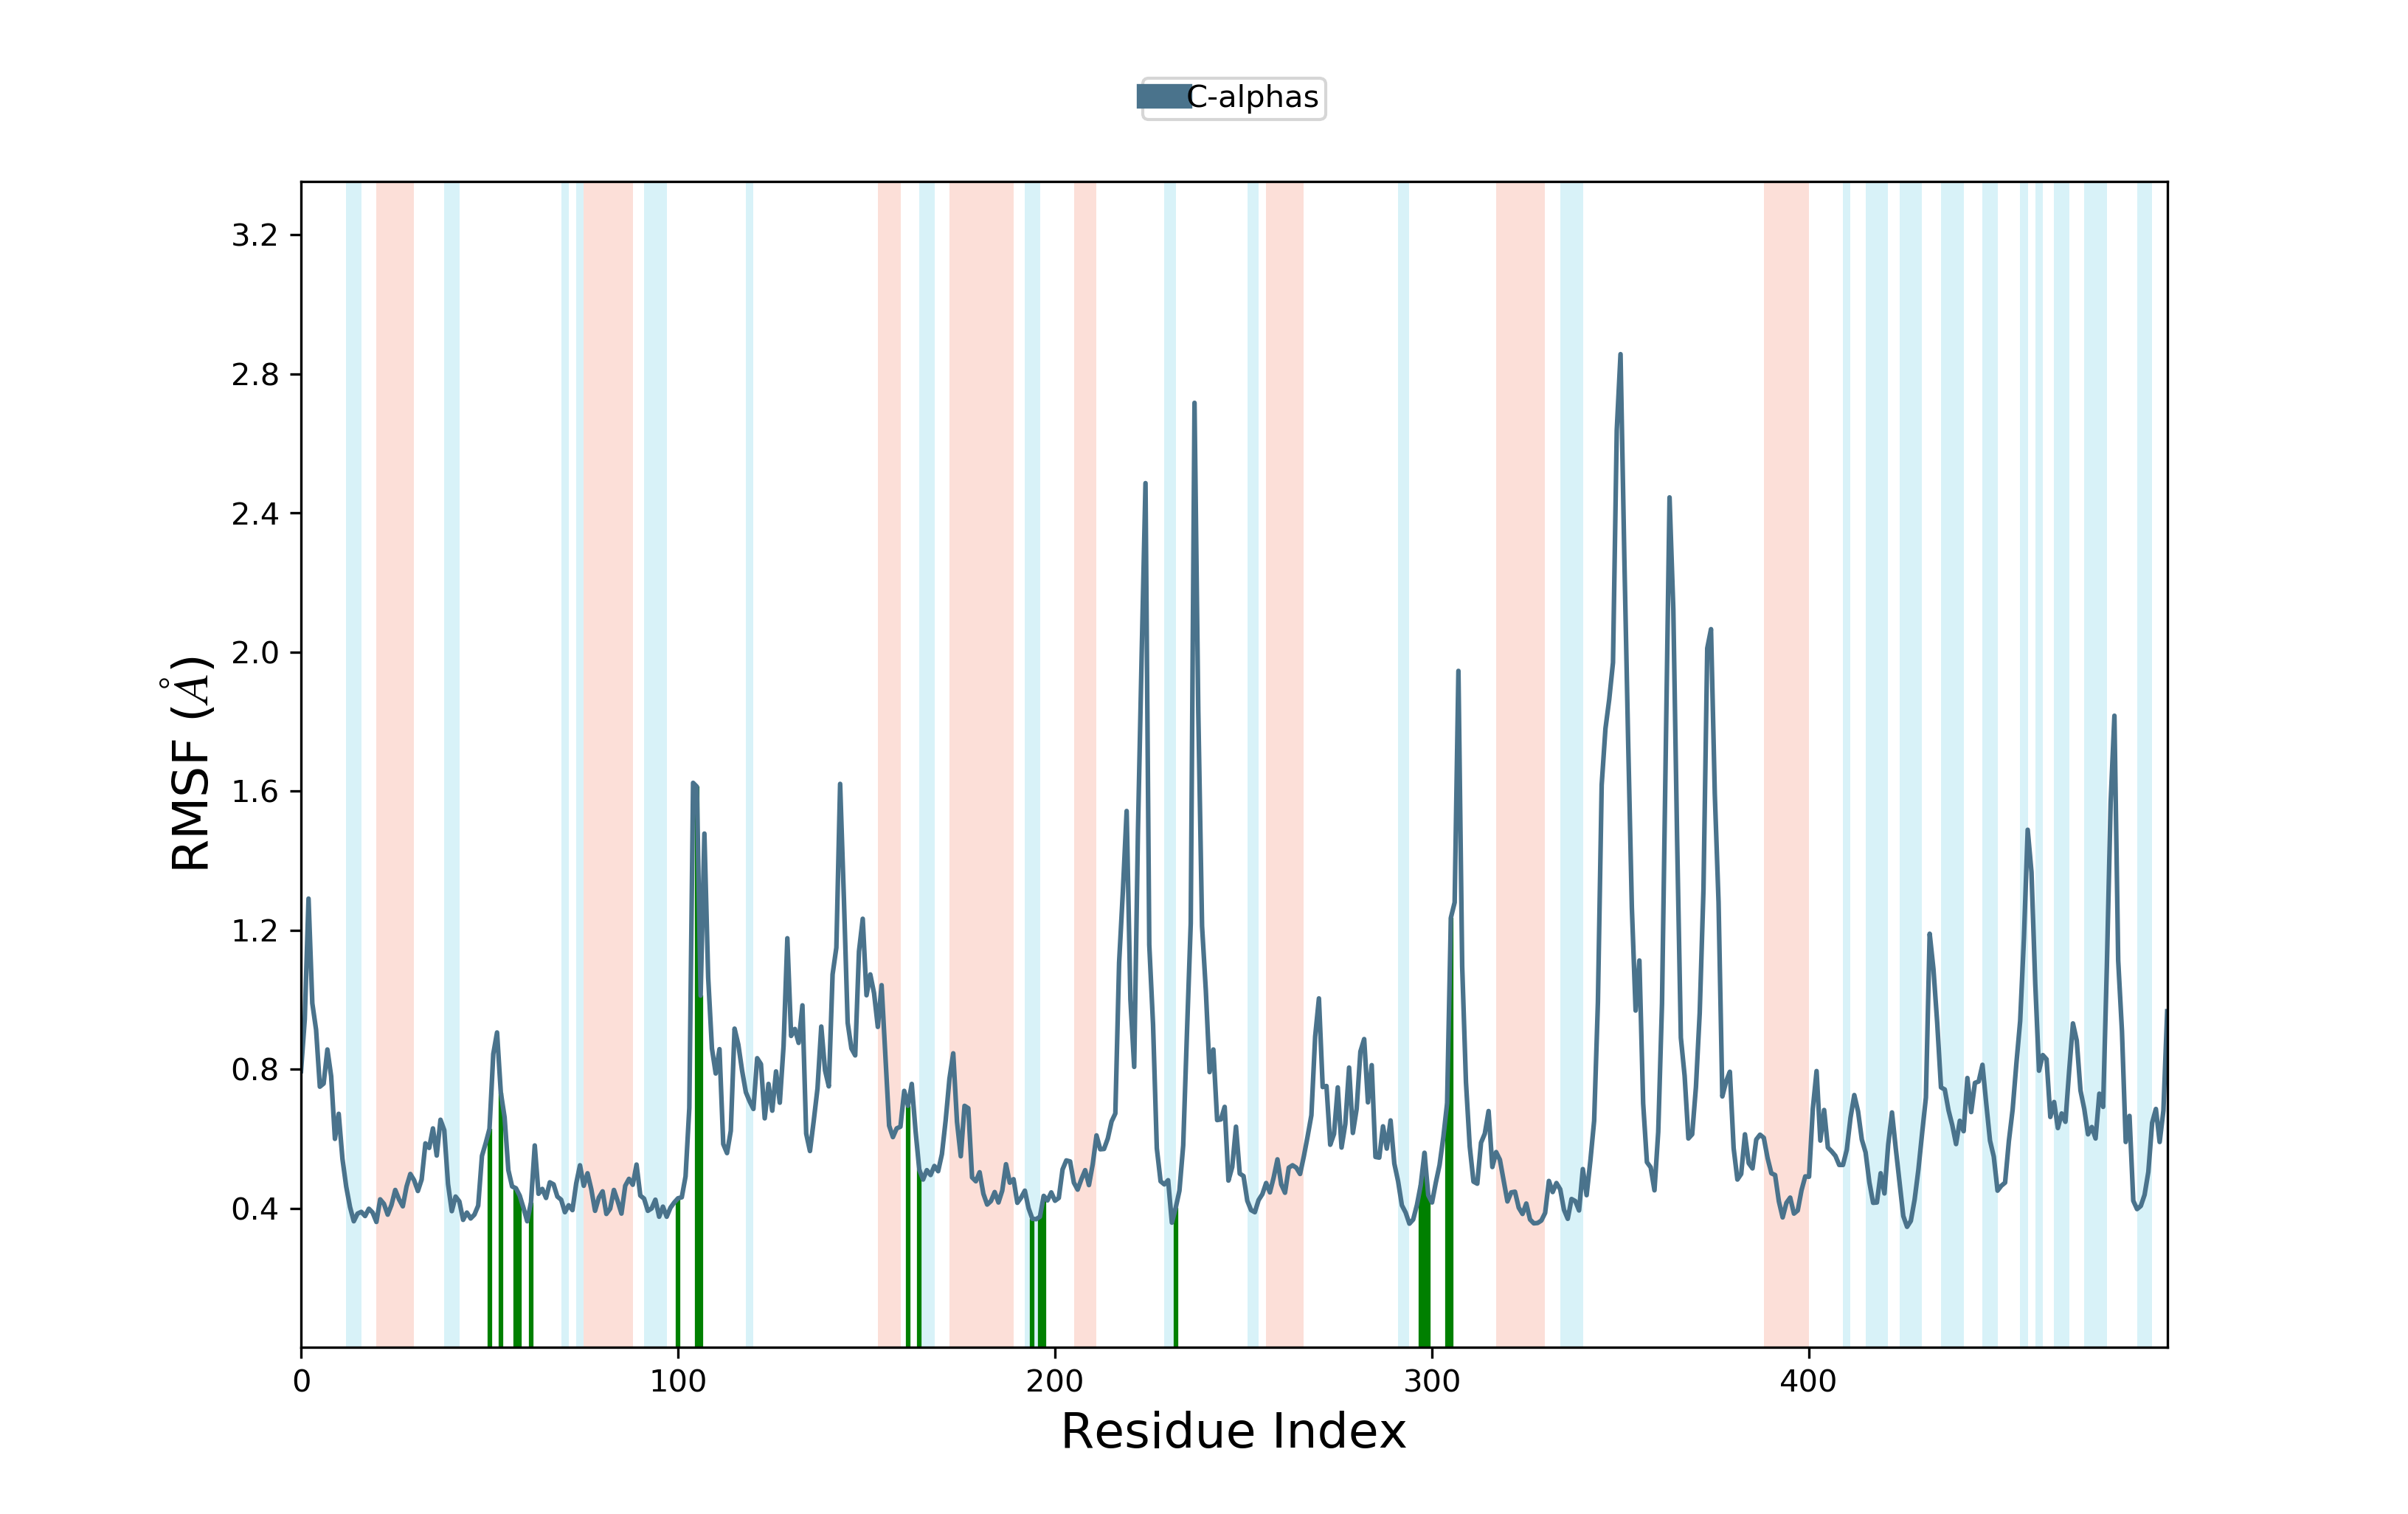


**Figure S8:** The RMSF trajectories and interaction of α-amylase (3DHP) protein-ligand ***Hypoglycin***
