# Supplementary material for: Unveiling the Antidiabetic Potential of Achyranthes aspera In Vitro and In Silico Efficacy Insights
Source: Research Square preprint supplement (doi:10.21203/rs.3.rs-5777722/v1), 2025-04-29
Supplement: Supplementary file 6 [file c8eb9103dd20253fca1329a6.docx]

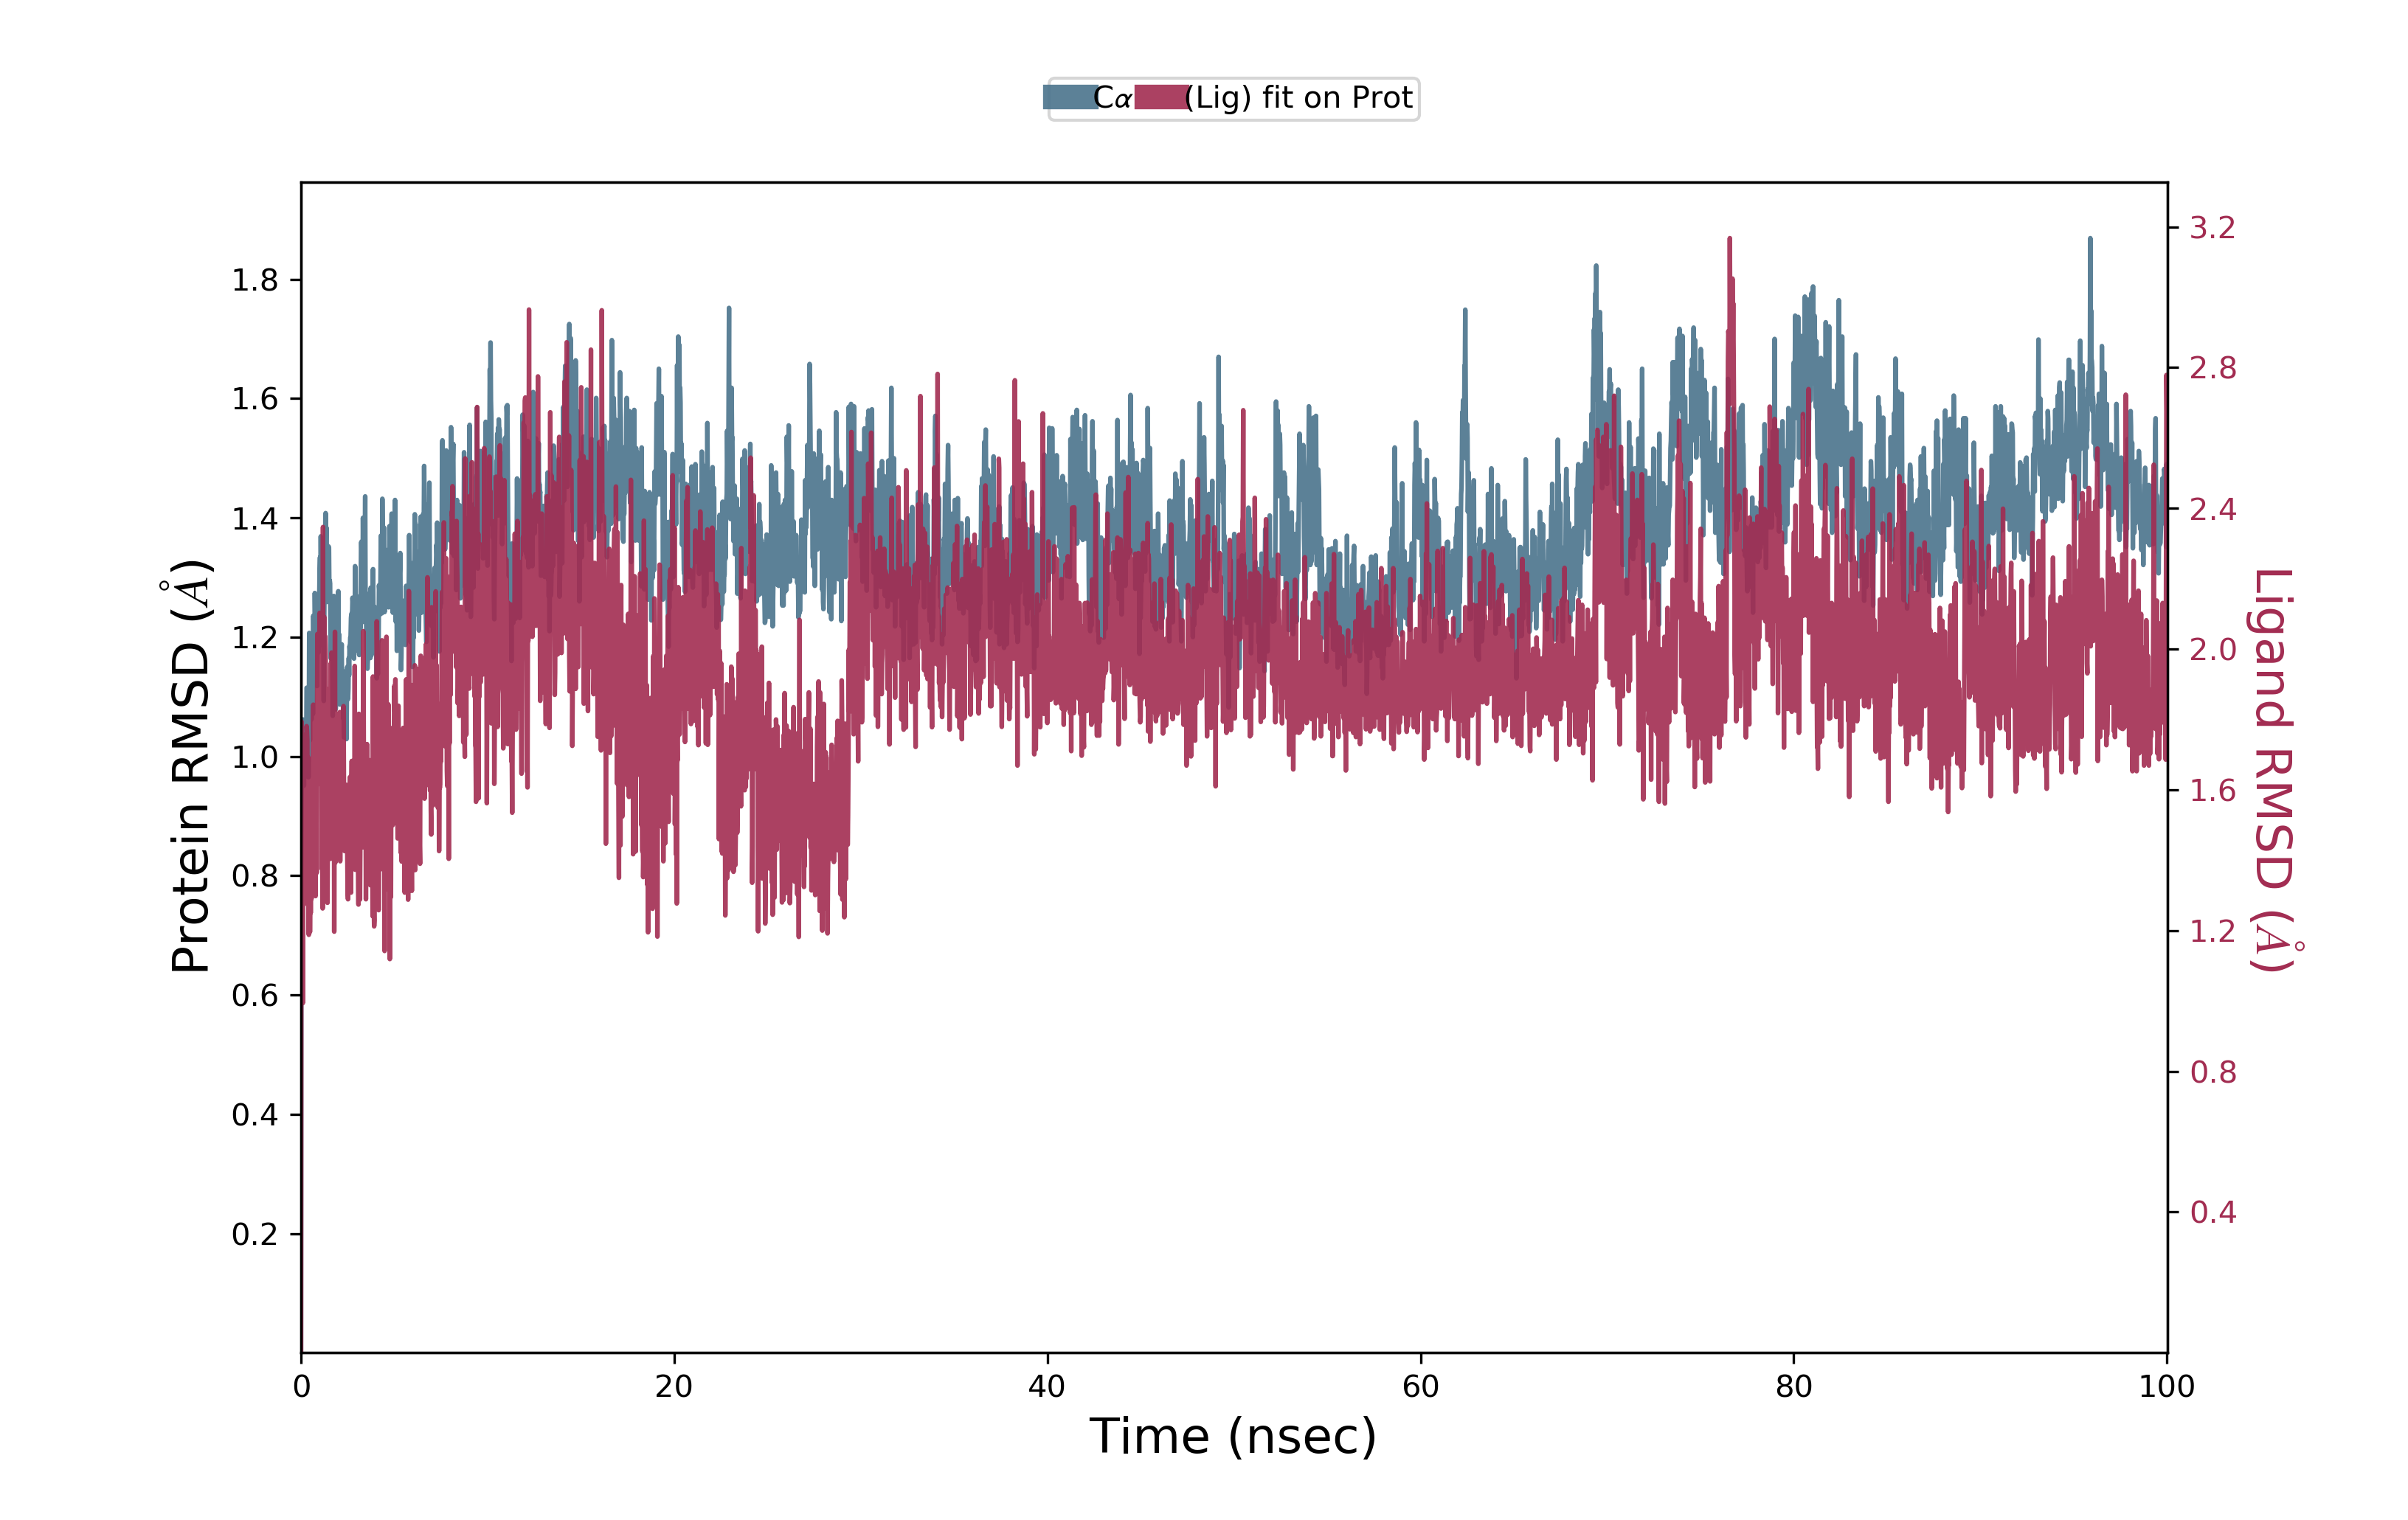


**Figure S13:** The RMSD trajectories and interaction of DPP4 protein-ligand (**Catechin 5-O-gallate).**


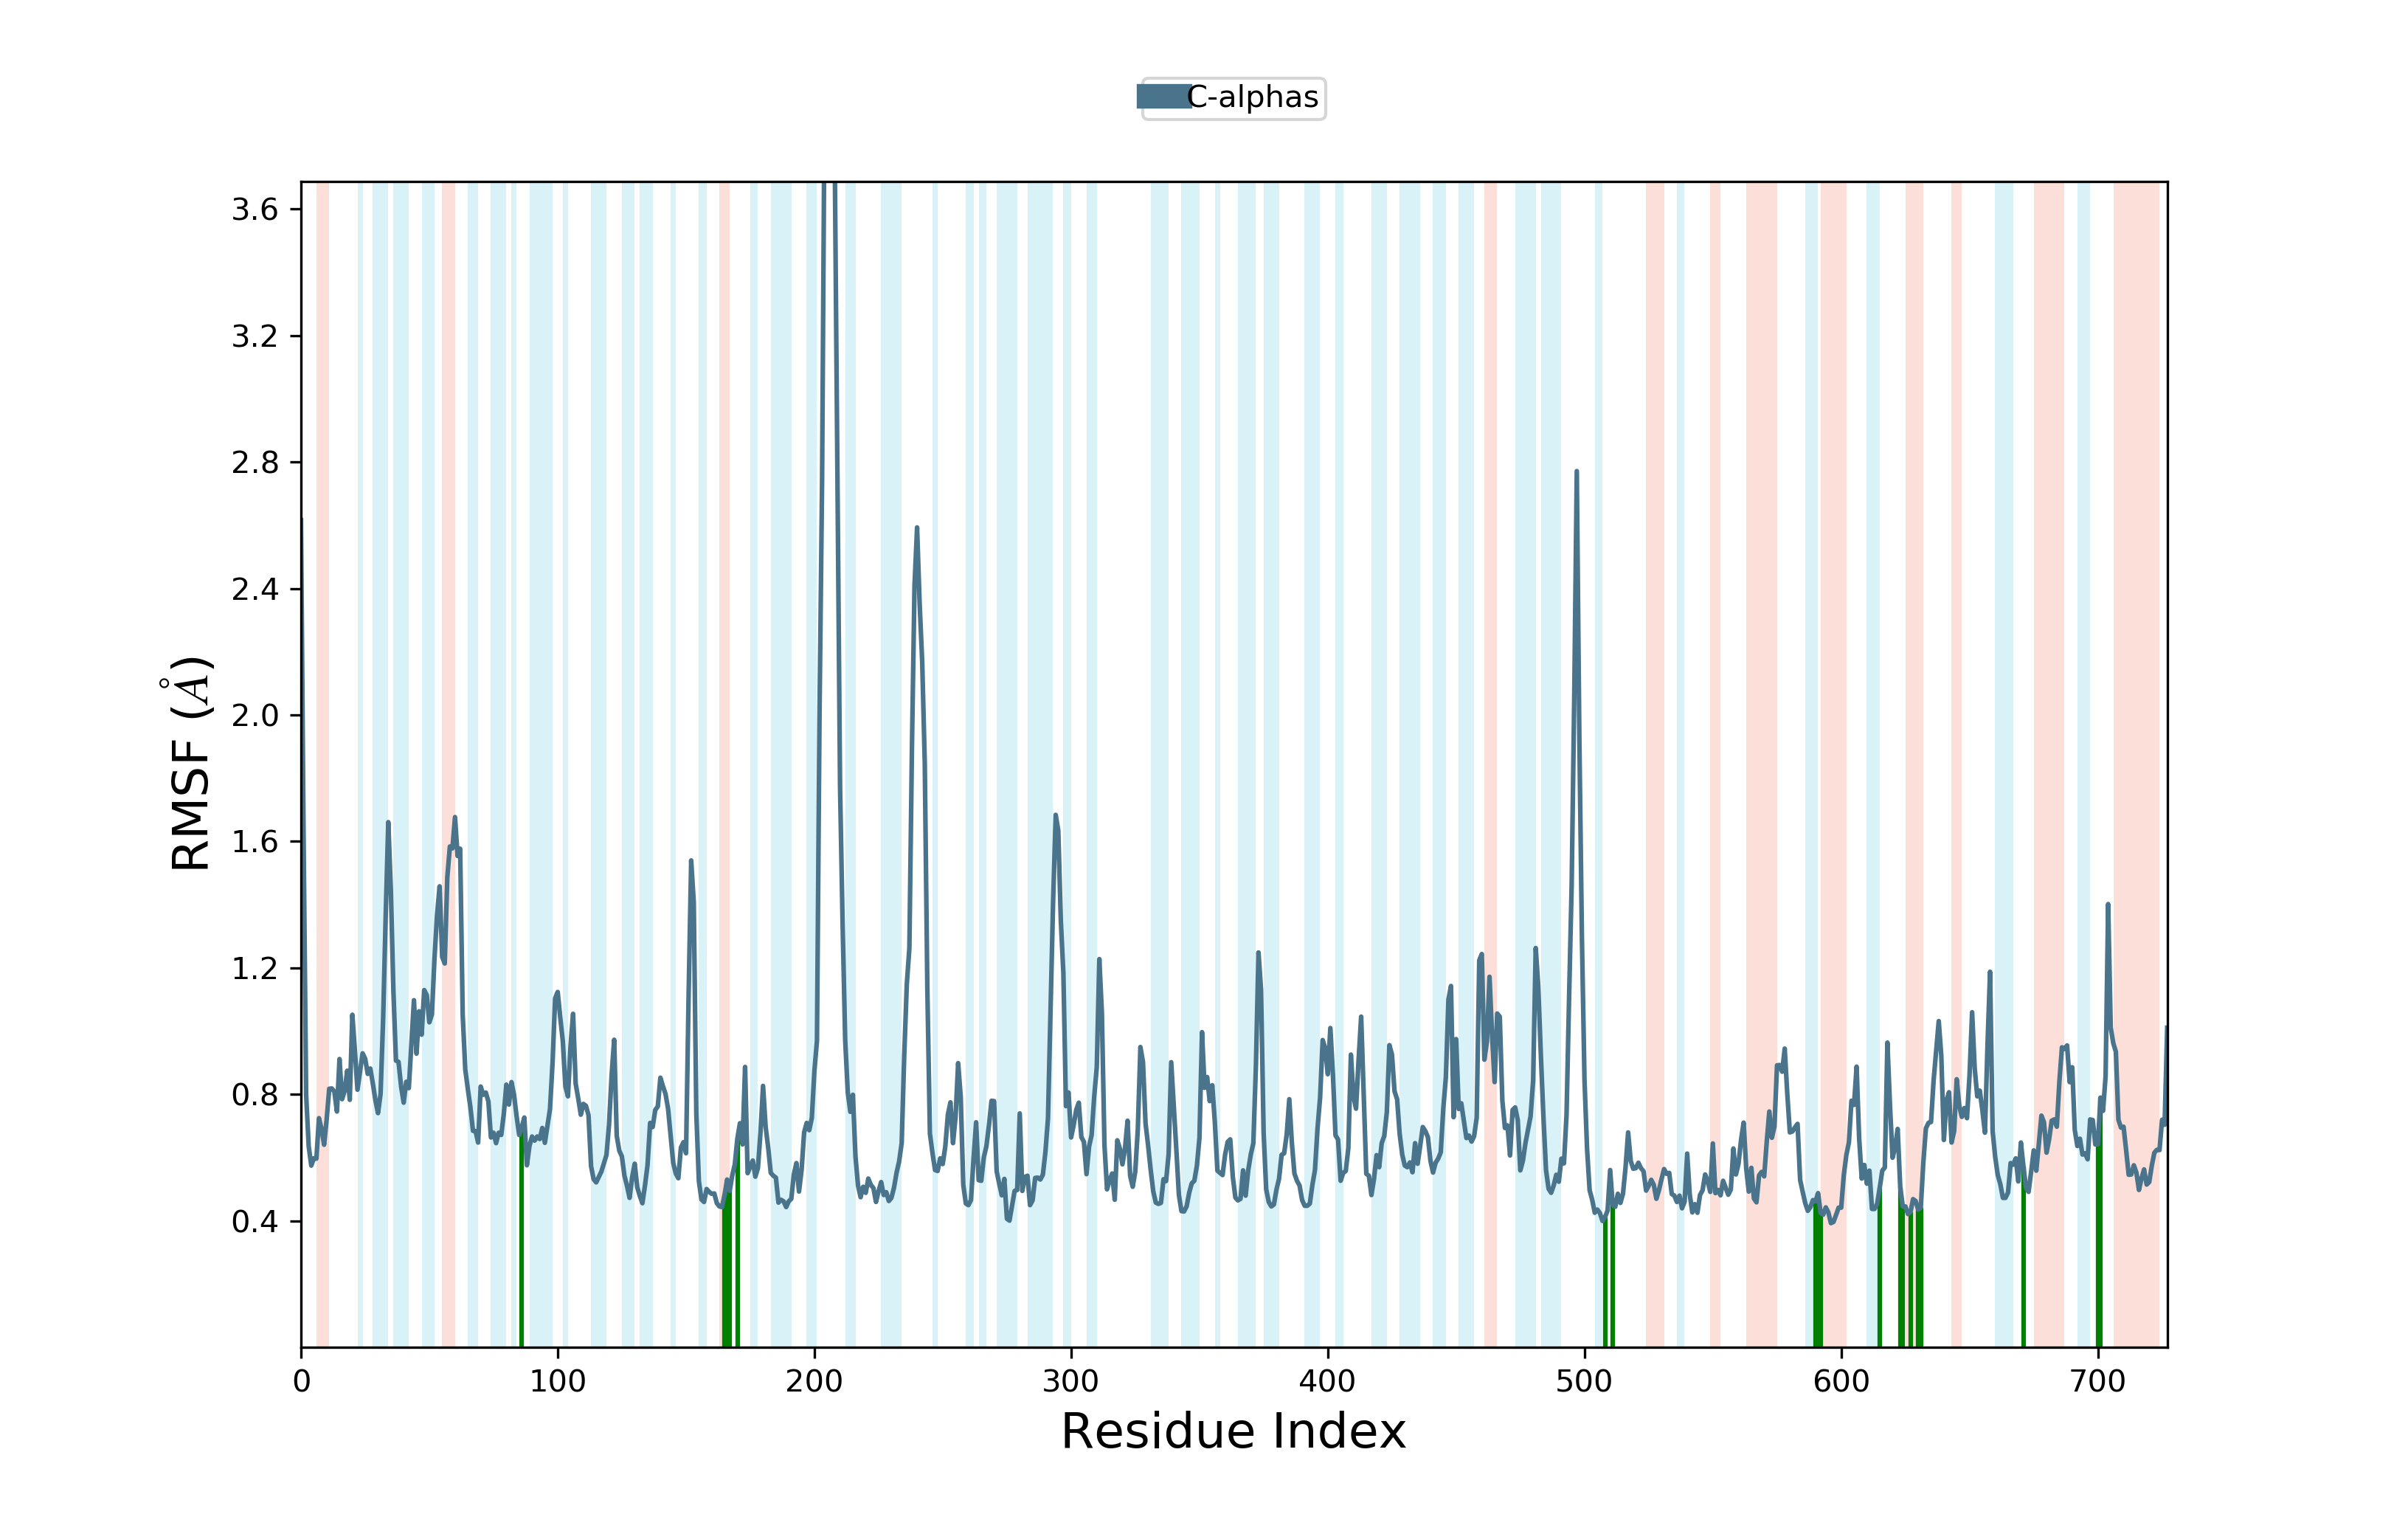


**Figure S14:** The RMSF trajectories and interaction of DPP4 protein-ligand (**Catechin 5-O-gallate).**


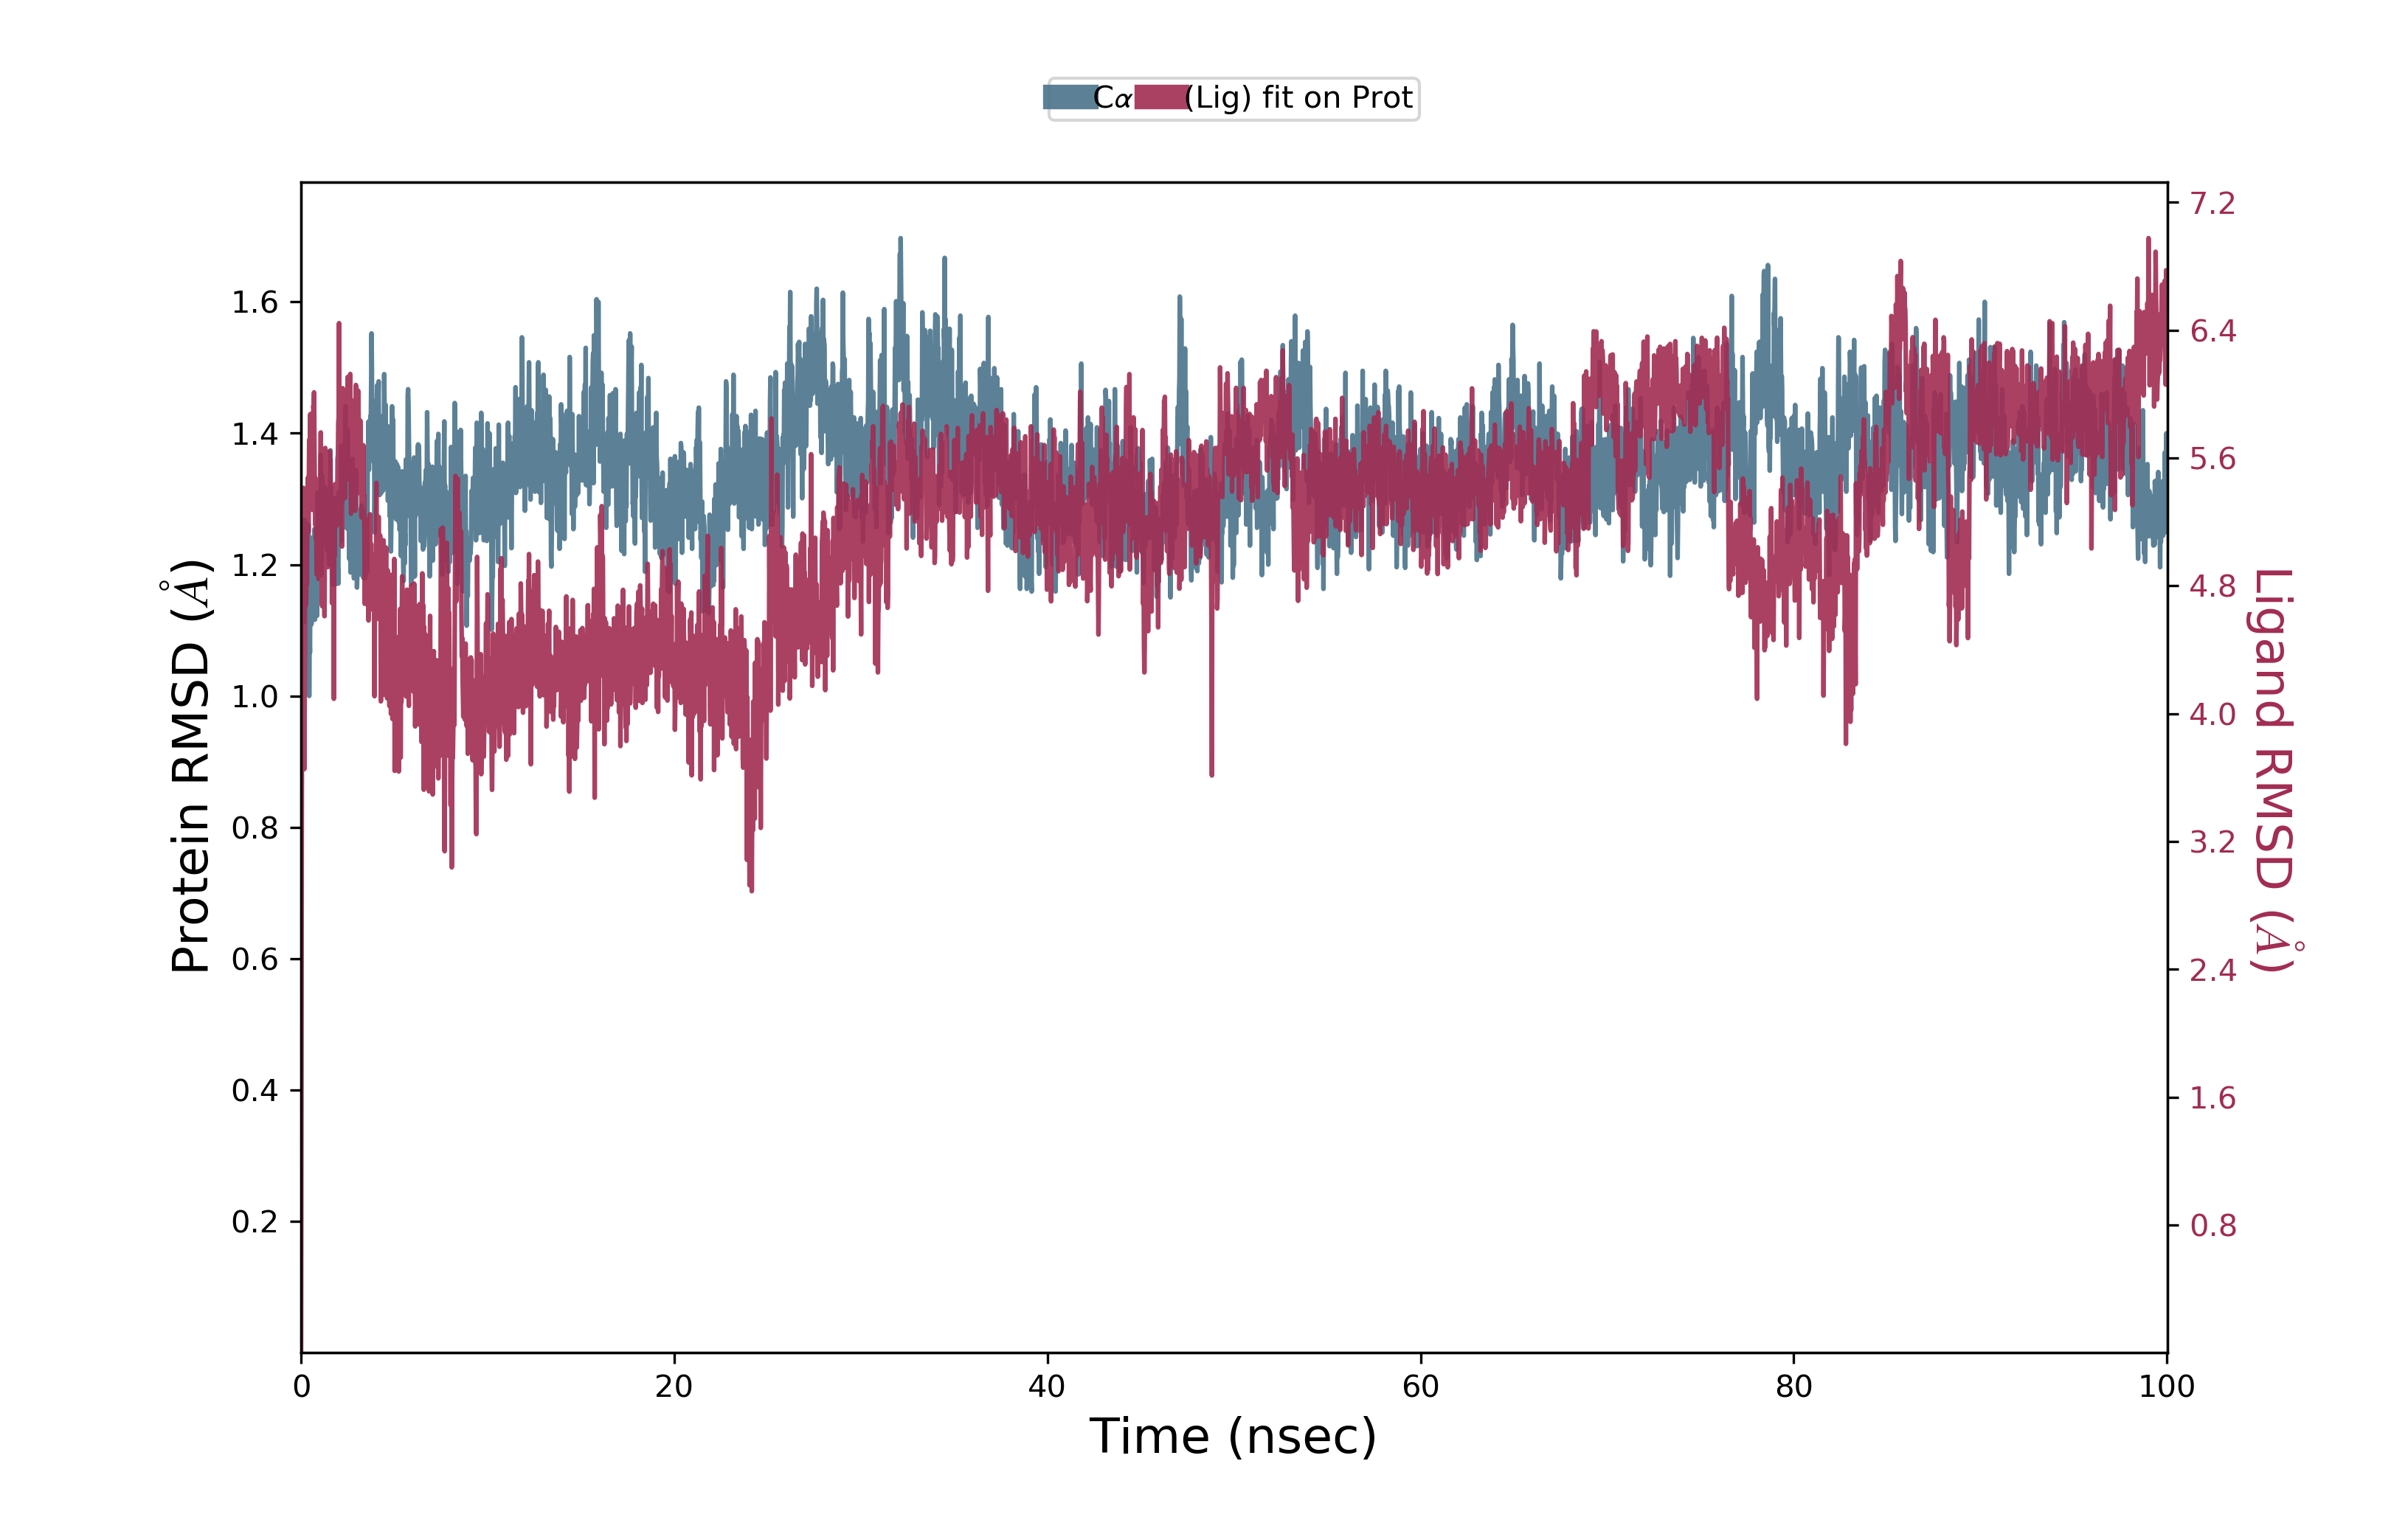


**Figure S15:** The RMSD trajectories and interaction of DPP4 protein-ligand (***Crosatoside B*).**


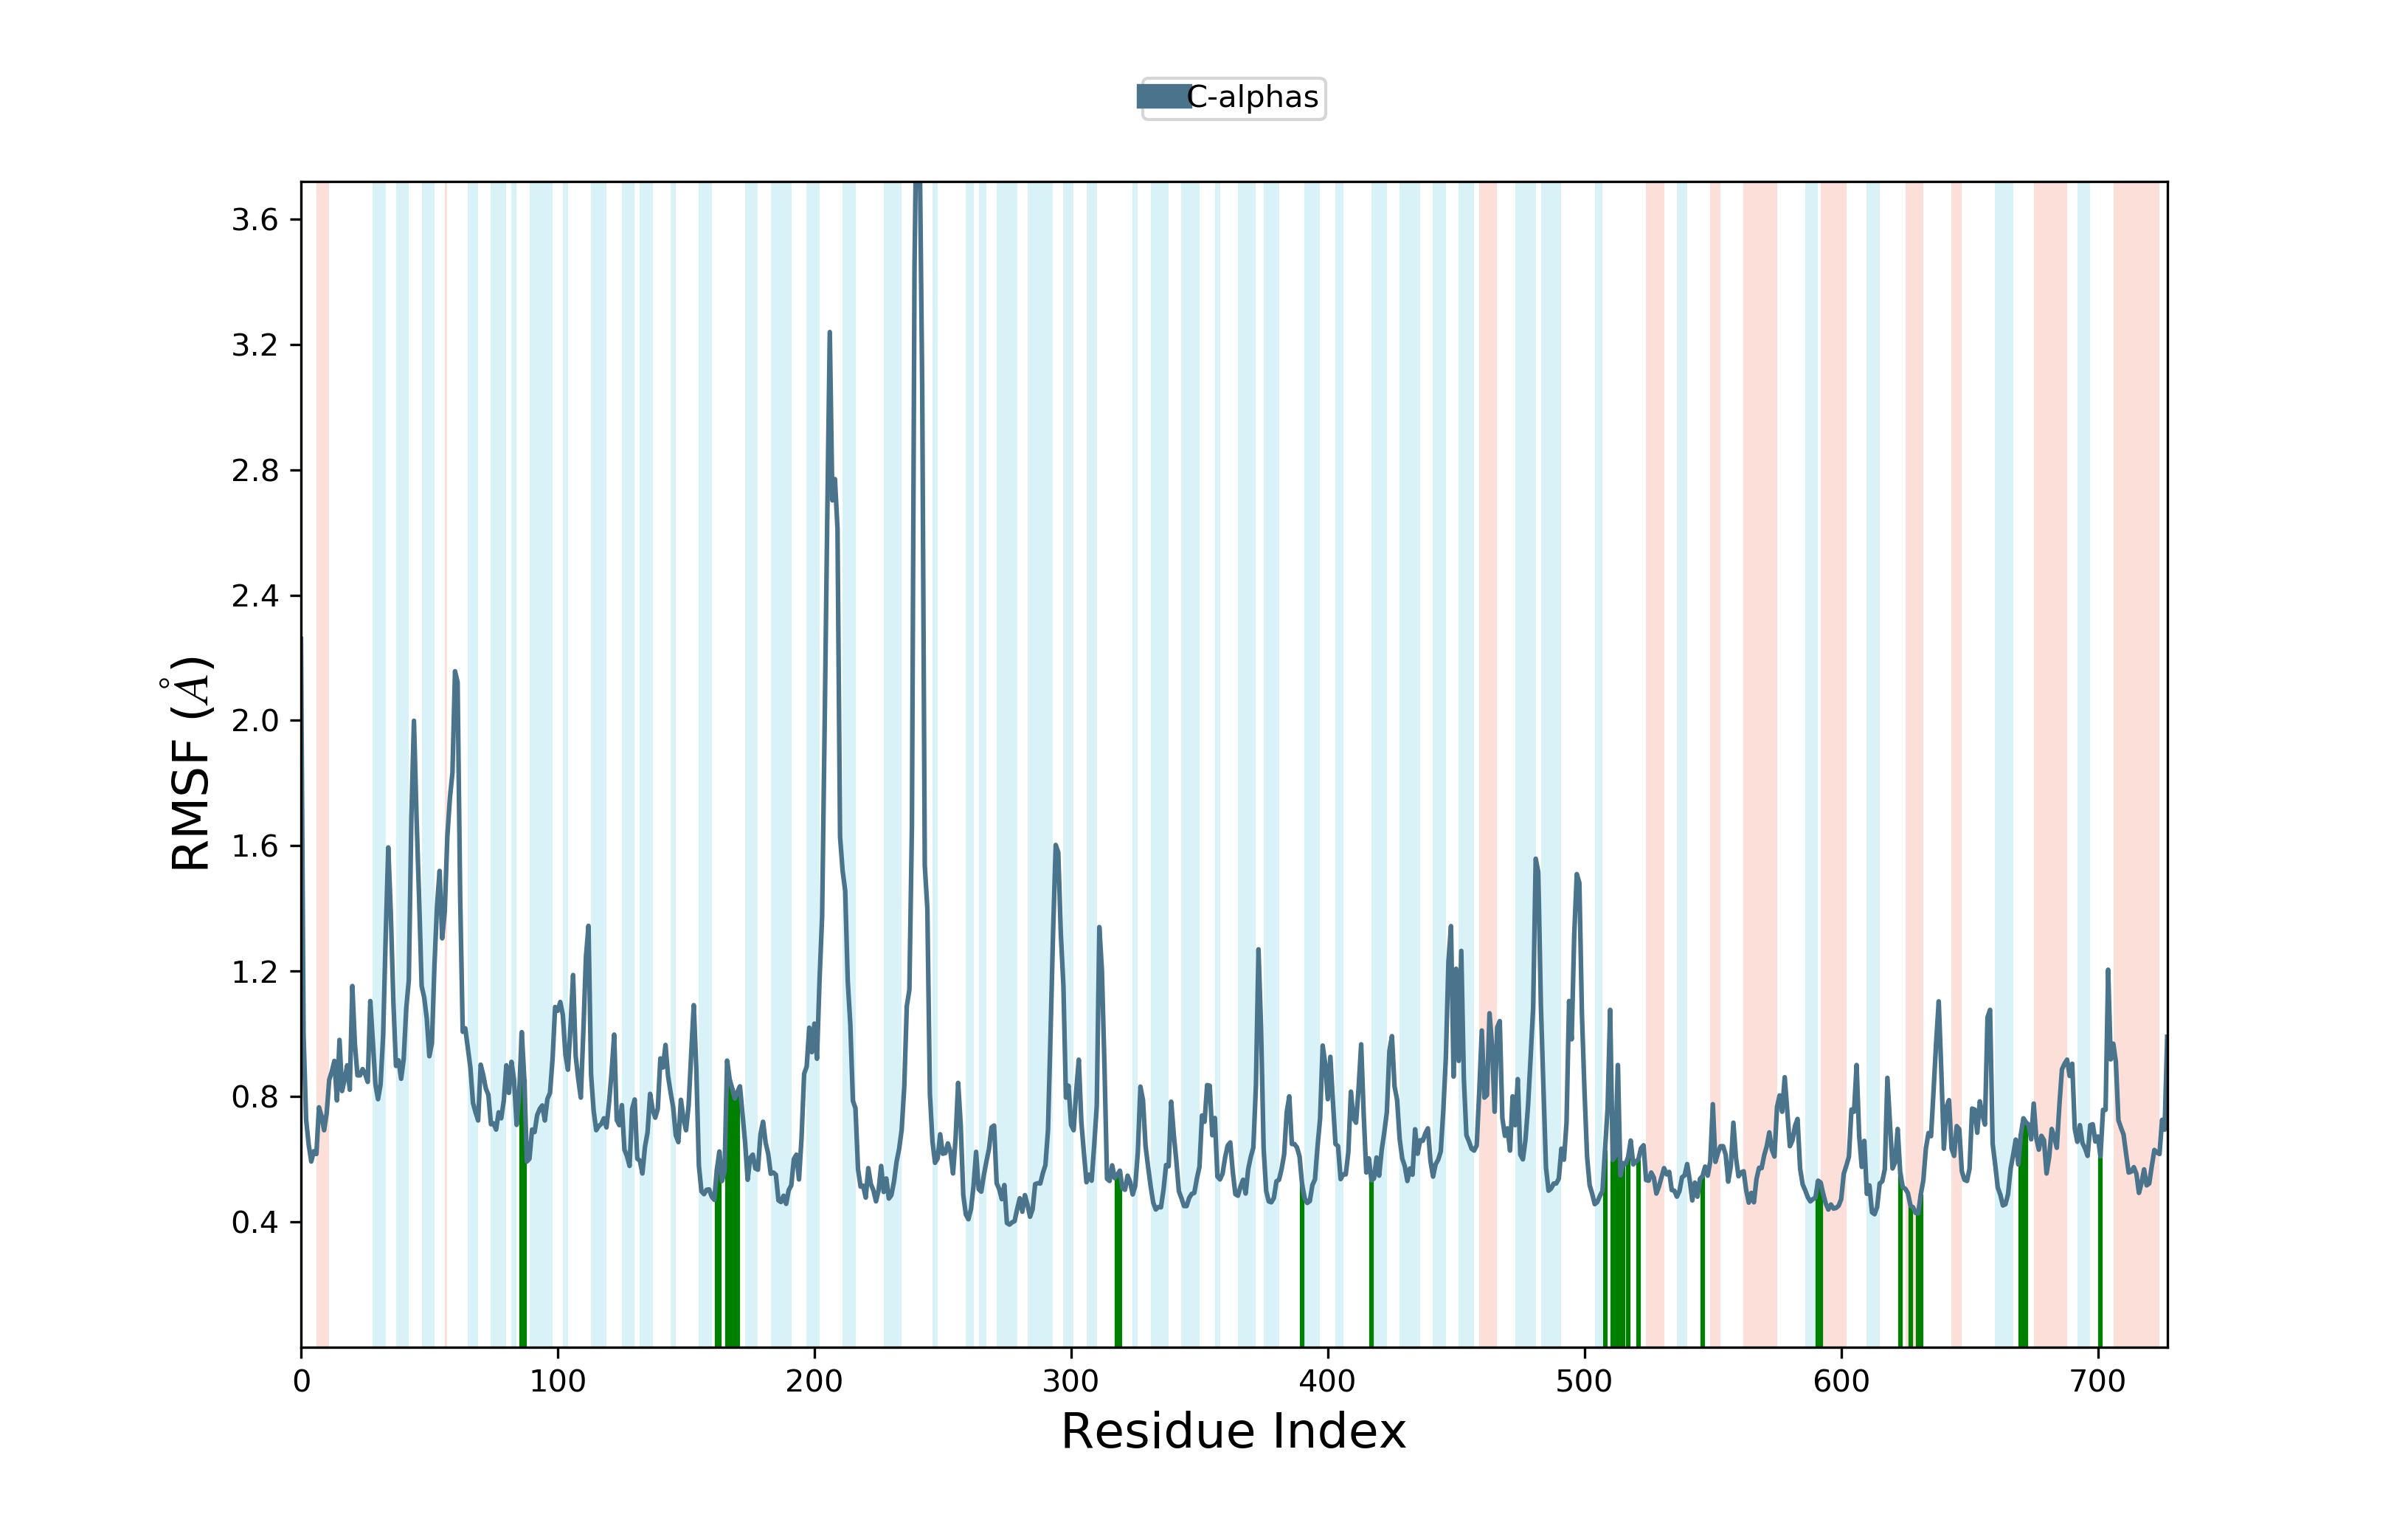


**Figure S16:** The RMSF trajectories and interaction of DPP4 protein-ligand (***Crosatoside B*).**


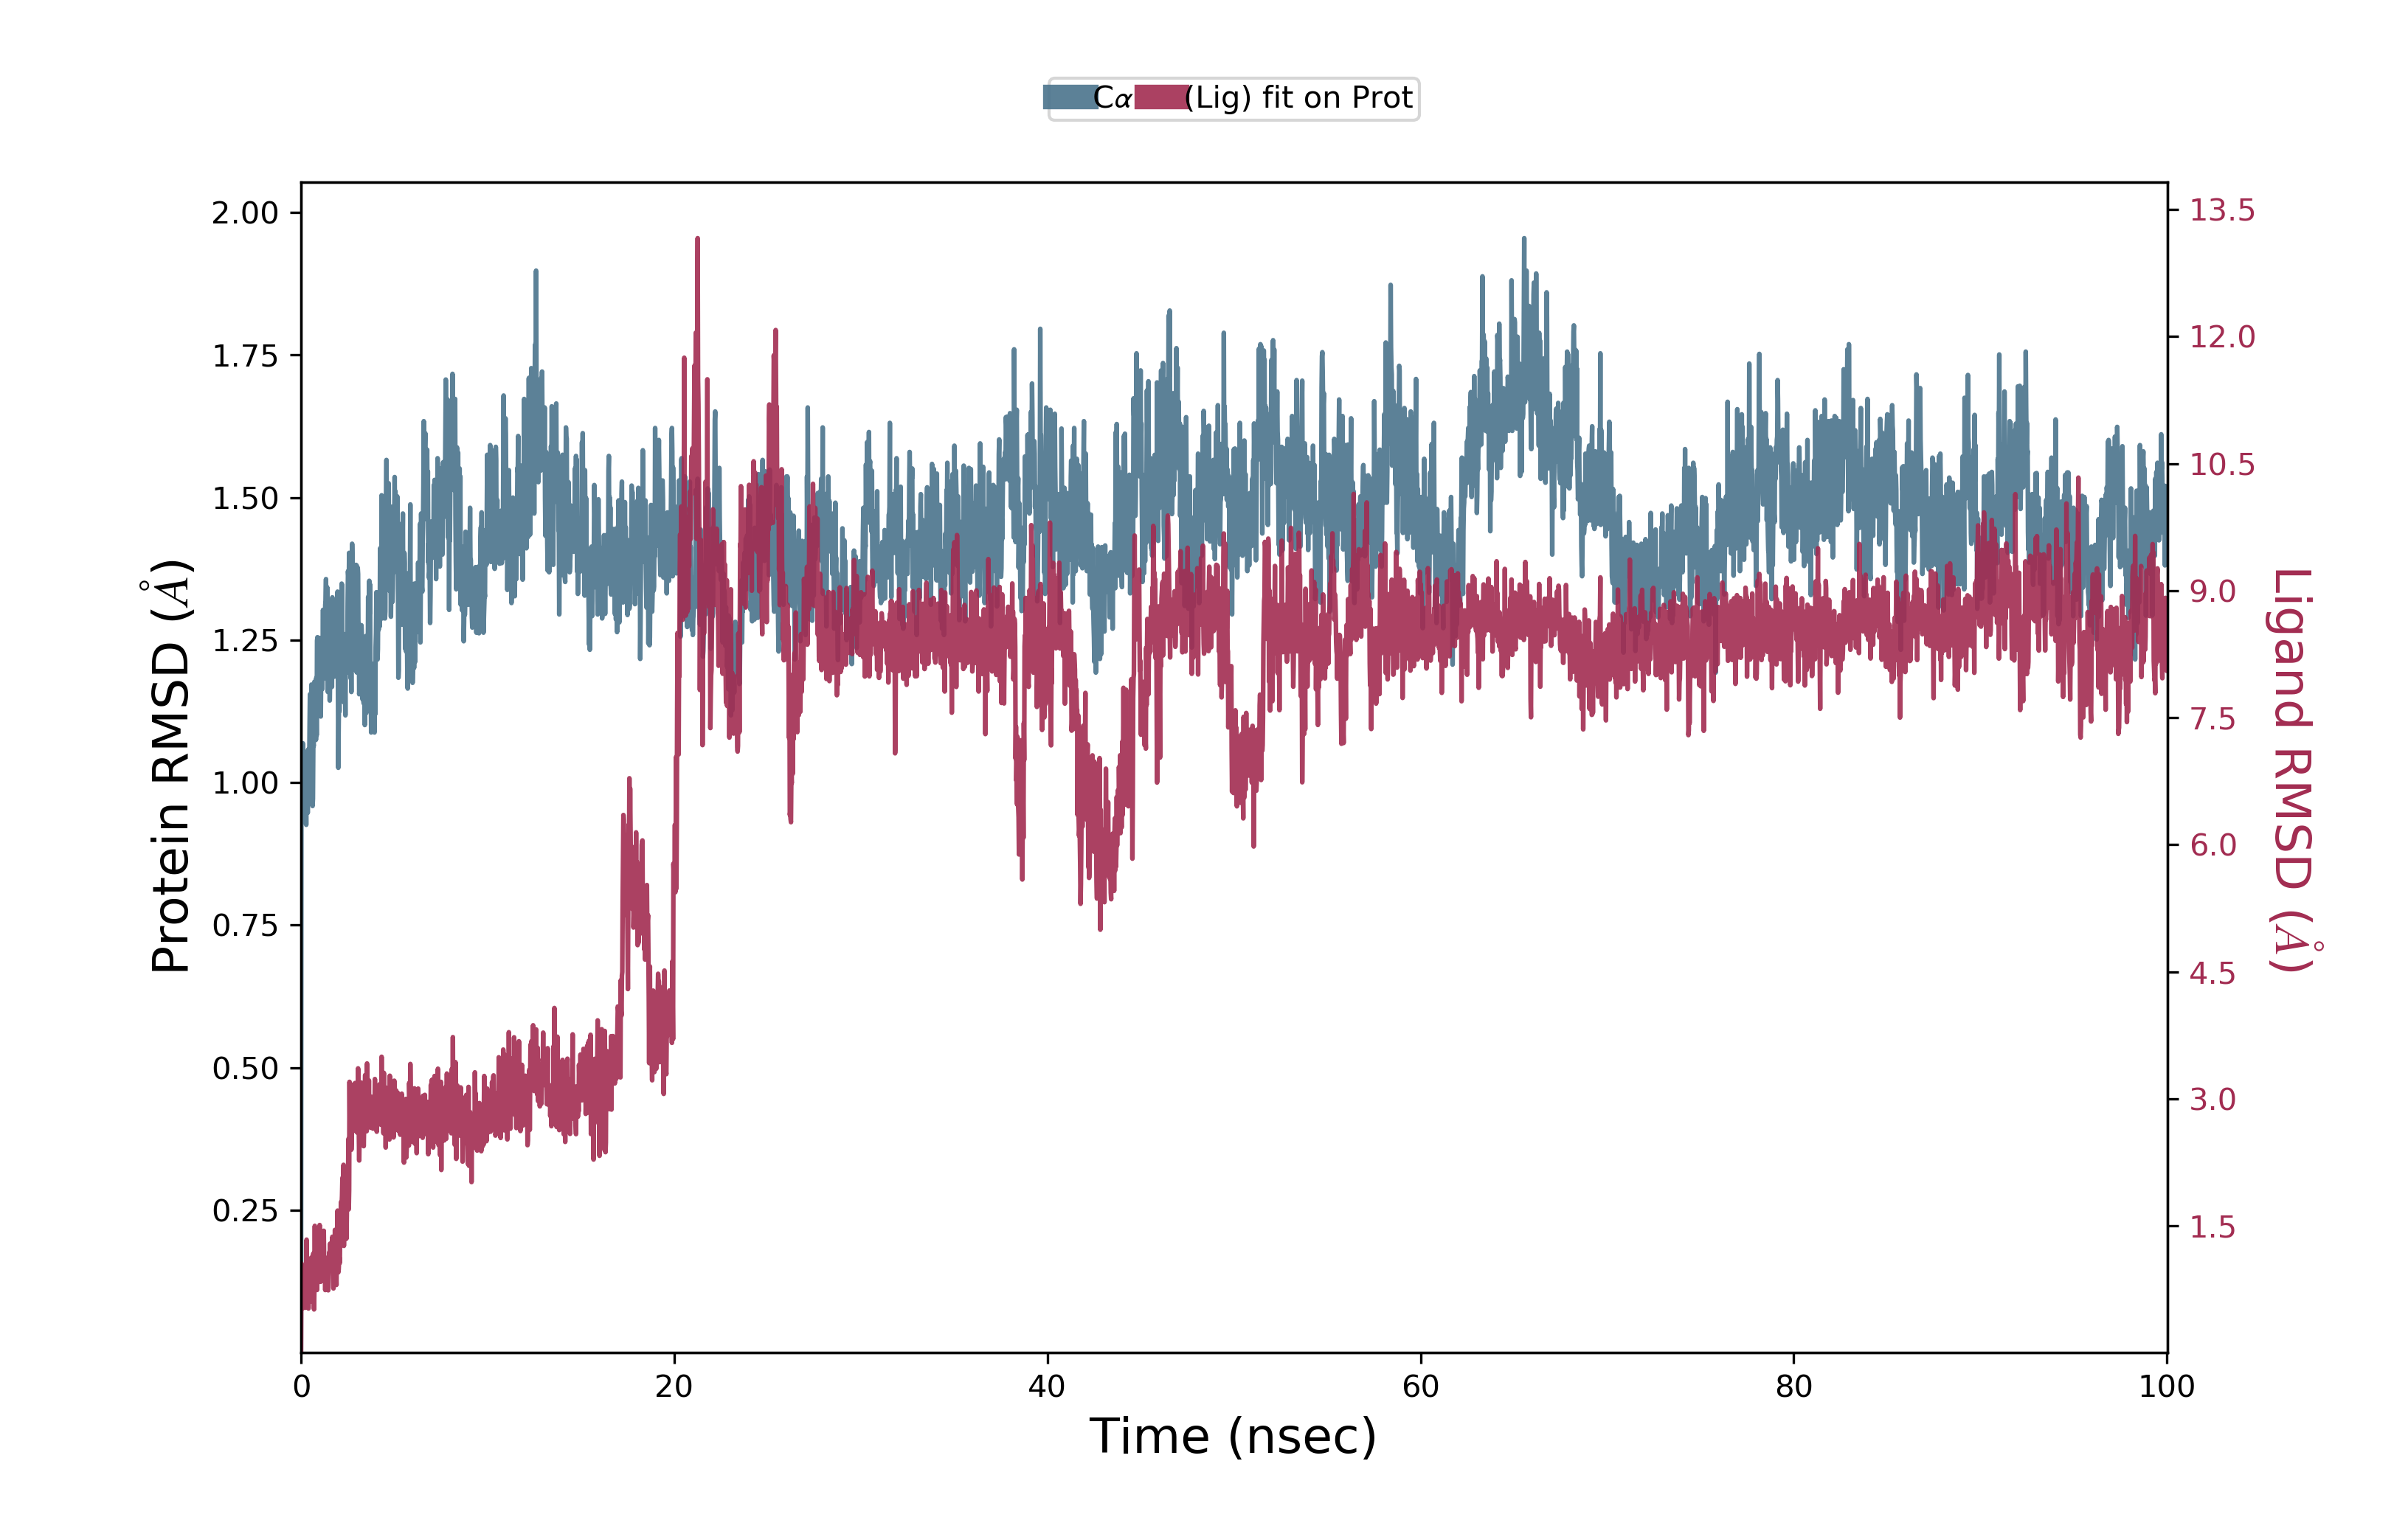


**Figure S17:** The RMSD trajectories and interaction of DPP4 protein-ligand ***Hypoglycin***


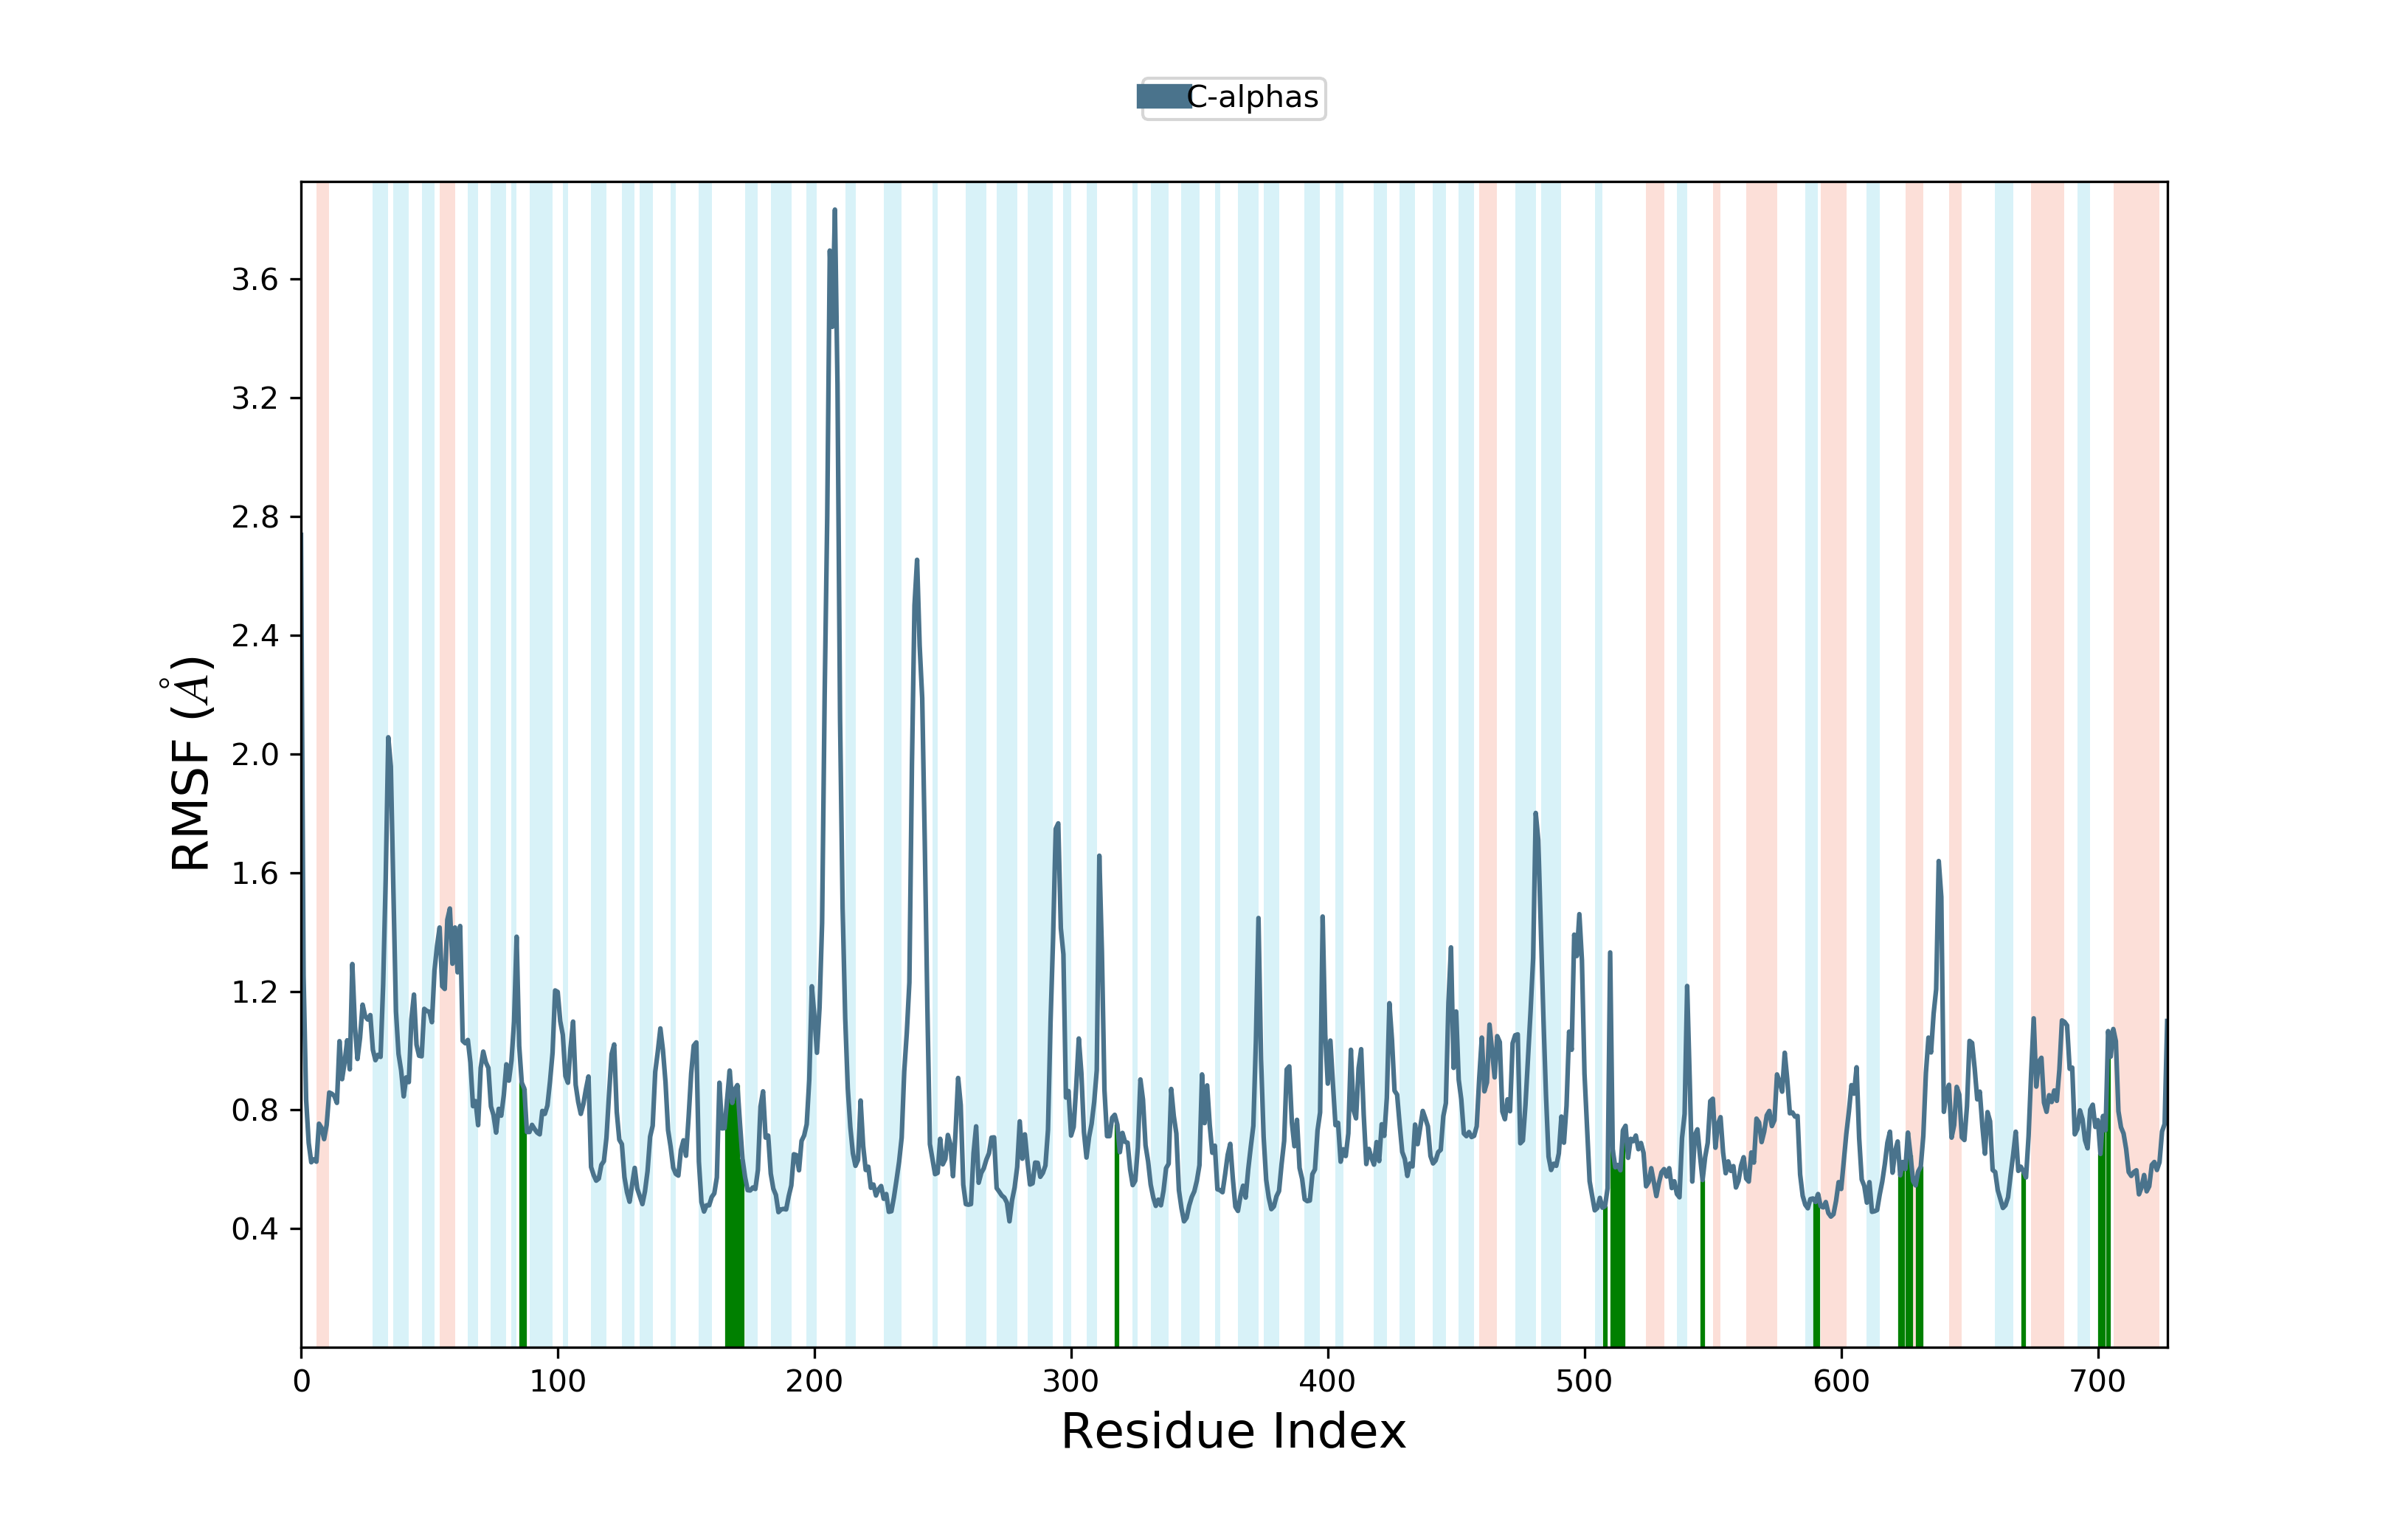


**Figure S18:** The RMSF trajectories and interaction of DPP4 protein-ligand ***Hypoglycin***
